# Supplementary material for: Regulation of stem/progenitor cell maintenance by BMP5 in prostate homeostasis and cancer initiation
Source: PubMed Central journal article supplement (PMC7525654; doi:10.7554/elife.54542), 2020-09-07

Full unedited gel for Figure 4S1B

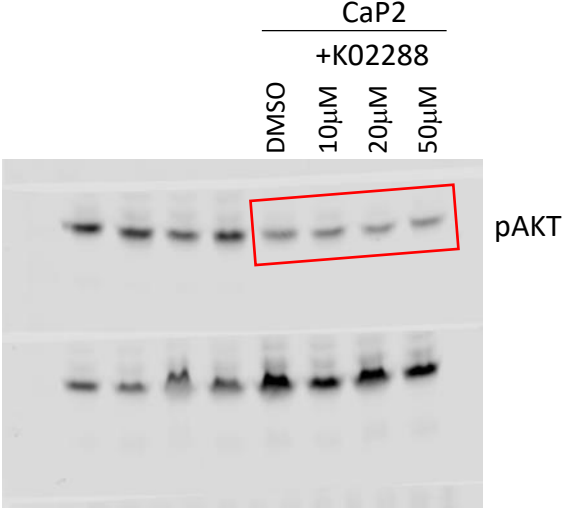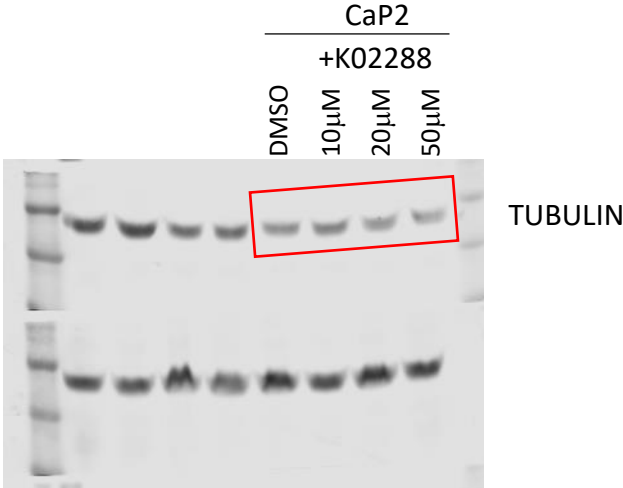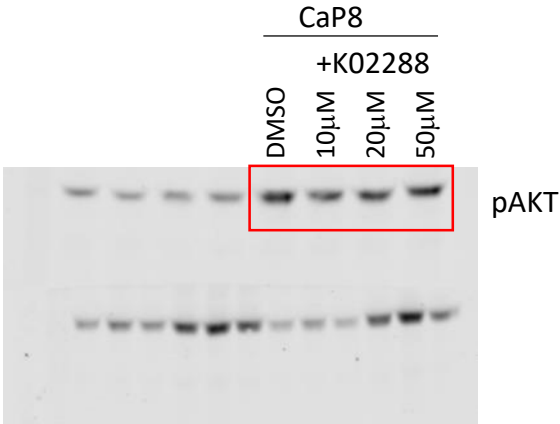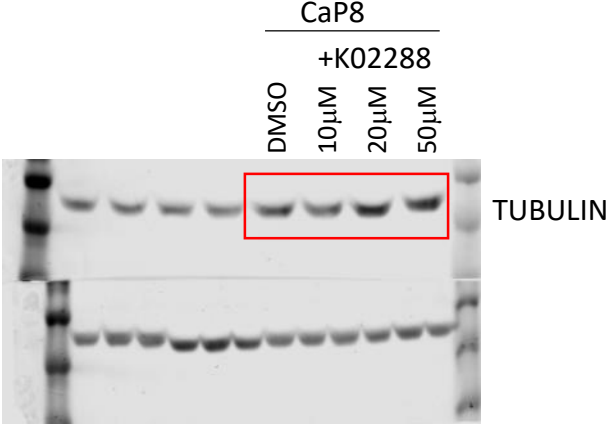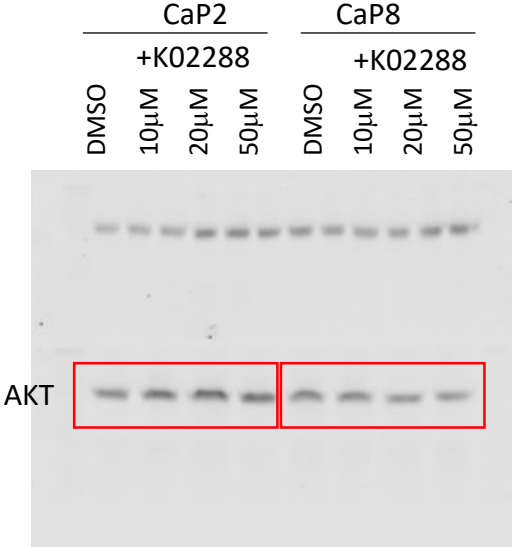

Supplement: elife-54542-fig4-figsupp2-data2.pdf [file elife-54542-fig4-figsupp2-data2.pdf]
