# Supplementary material for: Regulation of stem/progenitor cell maintenance by BMP5 in prostate homeostasis and cancer initiation
Source: eLife journal article supplement (doi:10.7554/elife.54542), 2020-09-07
Supplement: fig1-data1 [file elife-54542-fig1-data1-v2.pzfx]

<?xml version="1.0" encoding="UTF-8"?>
<GraphPadPrismFile xmlns="http://graphpad.com/prism/Prism.htm" PrismXMLVersion="5.00">
<Created>
<OriginalVersion CreatedByProgram="GraphPad Prism" CreatedByVersion="6.0.1.298" RegisteredTo="      " Login="Admin" DateTime="2020-07-16T13:45:38-05:00"/>
</Created>
<DefGraphButton ButtonID="101"/>
<InfoSequence>
<Ref ID="Info0" Selected="1"/>
</InfoSequence>
<Info ID="Info0">
<Title>Project info 1</Title>
<Notes>
</Notes>
<Constant><Name>Experiment Date</Name><Value>2020-04-14</Value></Constant>
<Constant><Name>Experiment ID</Name><Value/></Constant>
<Constant><Name>Notebook ID</Name><Value/></Constant>
<Constant><Name>Project</Name><Value/></Constant>
<Constant><Name>Experimenter</Name><Value/></Constant>
<Constant><Name>Protocol</Name><Value/></Constant>
</Info>

<TableSequence Selected="1">

<Ref ID="Table0"/>
<Ref ID="Table11"/>
<Ref ID="Table17"/>
<Ref ID="Table21" Selected="1"/>
</TableSequence>
<Table ID="Table0" XFormat="numbers" YFormat="replicates" Replicates="1" TableType="XY" EVFormat="AsteriskAfterNumber">
<Title>Fig1A</Title>
<RowTitlesColumn Width="39">
<Subcolumn>
<d>0</d>
<d>1</d>
<d>2</d>
<d>3</d>
<d>4</d>
<d>5</d>
<d>6</d>
</Subcolumn>
</RowTitlesColumn>
<XColumn Width="81" Decimals="0" Subcolumns="1">
<Title>Passage</Title>
<Subcolumn>
<d>0</d>
<d>1</d>
<d>2</d>
<d>3</d>
<d>4</d>
<d>5</d>
<d>6</d>
</Subcolumn>
</XColumn>
<YColumn Width="81" Decimals="2" Subcolumns="1">
<Title>Wild type</Title>
<Subcolumn>
<d>0.1</d>
<d>0.21</d>
<d>0.41</d>
<d>0.45</d>
<d>0.39</d>
<d>0.19</d>
<d>0.09</d>
</Subcolumn>
</YColumn>
<YColumn Width="85" Decimals="2" Subcolumns="1">
<Title>PbCreGata3f/f</Title>
<Subcolumn>
<d>0.1</d>
<d>0.4</d>
<d>0.52</d>
<d>0.5</d>
<d>0.86</d>
<d>1.3</d>
<d>1.43</d>
</Subcolumn>
</YColumn>
<YColumn Width="97" Decimals="2" Subcolumns="1">
<Title>PbCreR26G3G3</Title>
<Subcolumn>
<d>0.1</d>
<d>0.29</d>
<d>0.41</d>
<d>0.12</d>
<d>0.02</d>
<d>0</d>
<d>0</d>
</Subcolumn>
</YColumn>
</Table>
<Table ID="Table11" XFormat="none" YFormat="SDN" TableType="TwoWay" EVFormat="AsteriskAfterNumber">
<Title>Fig1A growth rate</Title>
<RowTitlesColumn Width="109">
<Subcolumn>
<d>growth rate (k)</d>
</Subcolumn>
</RowTitlesColumn>
<YColumn Width="243" Decimals="6" Subcolumns="3">
<Title>Wild type</Title>
<Subcolumn>
<d>-0.008481</d>
</Subcolumn>
<Subcolumn>
<d>0.1191</d>
</Subcolumn>
<Subcolumn>
<d>7</d>
</Subcolumn>
</YColumn>
<YColumn Width="243" Decimals="6" Subcolumns="3">
<Title>PbCreGata3f/f</Title>
<Subcolumn>
<d>0.3011</d>
</Subcolumn>
<Subcolumn>
<d>0.04122</d>
</Subcolumn>
<Subcolumn>
<d>7</d>
</Subcolumn>
</YColumn>
<YColumn Width="243" Decimals="6" Subcolumns="3">
<Title>PbCreR26G3G3</Title>
<Subcolumn>
<d>-0.2207</d>
</Subcolumn>
<Subcolumn>
<d>0.2266</d>
</Subcolumn>
<Subcolumn>
<d>7</d>
</Subcolumn>
</YColumn>
</Table>
<Table ID="Table17" XFormat="numbers" YFormat="replicates" Replicates="1" TableType="XY" EVFormat="AsteriskAfterNumber">
<Title>Fig1B</Title>
<RowTitlesColumn Width="39">
<Subcolumn>
<d>0.</d>
<d>1.</d>
<d>2.</d>
<d>3.</d>
<d>4.</d>
<d>5.</d>
<d>6</d>
</Subcolumn>
</RowTitlesColumn>
<XColumn Width="81" Decimals="0" Subcolumns="1">
<Title>Passage</Title>
<Subcolumn>
<d>0</d>
<d>1</d>
<d>2</d>
<d>3</d>
<d>4</d>
<d>5</d>
<d>6</d>
</Subcolumn>
</XColumn>
<YColumn Width="81" Decimals="6" Subcolumns="1">
<Title>Wild type</Title>
<Subcolumn>
<d>0.1</d>
<d>0.05</d>
<d>0.04</d>
<d>0.02</d>
<d>0.01</d>
<d>0</d>
<d>0</d>
</Subcolumn>
</YColumn>
<YColumn Width="125" Decimals="6" Subcolumns="1">
<Title>Krt5CreERT2Gata3f/f</Title>
<Subcolumn>
<d>0.1</d>
<d>0.12</d>
<d>0.73</d>
<d>1.3</d>
<d>1.56</d>
<d>2.4</d>
<d>3.49</d>
</Subcolumn>
</YColumn>
<YColumn Width="85" Decimals="6" Subcolumns="1">
<Title>PbCreGata3f/f</Title>
<Subcolumn>
<d>0.1</d>
<d>0.24</d>
<d>0.52</d>
<d>0.6</d>
<d>0.49</d>
<d>1.58</d>
<d>3.58</d>
</Subcolumn>
</YColumn>
<YColumn Width="125" Decimals="6" Subcolumns="1">
<Title>Krt8CreERT2Gata3f/f</Title>
<Subcolumn>
<d>0.1</d>
<d>0.01</d>
<d>0.06</d>
<d>0.06</d>
<d>0.08</d>
<d>0</d>
<d>0</d>
</Subcolumn>
</YColumn>
</Table>
<Table ID="Table21" XFormat="none" YFormat="SDN" TableType="TwoWay" EVFormat="AsteriskAfterNumber">
<Title>Fig1B growth rate</Title>
<RowTitlesColumn Width="109">
<Subcolumn>
<d>growth rate (k)</d>
</Subcolumn>
</RowTitlesColumn>
<YColumn Width="243" Decimals="5" Subcolumns="3">
<Title>Wild type</Title>
<Subcolumn>
<d>-0.5637</d>
</Subcolumn>
<Subcolumn>
<d>0.05552</d>
</Subcolumn>
<Subcolumn>
<d>7</d>
</Subcolumn>
</YColumn>
<YColumn Width="243" Decimals="5" Subcolumns="3">
<Title>Krt5CreERT2Gata3f/f</Title>
<Subcolumn>
<d>0.4131</d>
</Subcolumn>
<Subcolumn>
<d>0.04088</d>
</Subcolumn>
<Subcolumn>
<d>7</d>
</Subcolumn>
</YColumn>
<YColumn Width="243" Decimals="5" Subcolumns="3">
<Title>PbCreGata3f/f</Title>
<Subcolumn>
<d>0.7556</d>
</Subcolumn>
<Subcolumn>
<d>0.1015</d>
</Subcolumn>
<Subcolumn>
<d>7</d>
</Subcolumn>
</YColumn>
<YColumn Width="243" Decimals="5" Subcolumns="3">
<Title>Krt8CreERT2Gata3f/f</Title>
<Subcolumn>
<d>-0.2189</d>
</Subcolumn>
<Subcolumn>
<d>0.1809</d>
</Subcolumn>
<Subcolumn>
<d>7</d>
</Subcolumn>
</YColumn>
</Table>

<!--Analyses, graphs and layouts as compressed binary. Don't edit this part of the file.-->

<Template xmlns:dt="urn:schemas-microsoft-com:datatypes" dt:dt="bin.base64">eNrsvQtAVNe18L/PzPAU30DwhSP4FvGdmJdAEh/9fKEQH732SxAGmYhgeIhGHUmTWFNNfdBU
m97em/ZLrqT3tkl7YxMTSOynbew/D4PyV+qjSaw3sT4iKnIT9TrfXmfWHvYcz8AcGKgzrN3+
cl777LX22muts89jMP3hadOmz0+bqJRHMca2KdsUE/9vDltk+gUbzPcsMjGPIrYVzktxjMGm
qTx9GGMWvhbJsXFCOA28SgxfRuG2KBbEhK0ouL8LpydznUOFChUqVKhQCcwSxgnH6z8VKlSo
UKFCJfCKWXMPT4UKFSpUqFChQoUKFSpUqFChQoUKFSpUqFBpXTGzh/h/55sZm2VpWvpenLyc
VBQW4vrCzsJ+fId2NLQcPgUcyMLUDrtKWpE9K7+ZDsOnid2k7W2urwjNJiUB23HtWGAryskq
yPIqexinR7PtqB84sow1K5YW5rNm2+mt204vbMestrPQXrAsh1PcTL/667ZjwnZcJsm0r7AV
W+fYyqzzC1dkFdzWTiKna7P6wOucjSz13V99cuDopx9+wvTbGezVPkKfULUdaObDTz76L9ZM
O1HNthPmbkdVp9X6hKs7Hi4sLbLbisBCzFs7+uM1DtuJcNm5yLa0NDvPVmKdncF02hnC6d6s
/0Sq/VJt00w71hb71UXdkfpQVklWwTJmvB0x7lGucVcDzPpogT27MMcGjXmWUS3GV9cm/3F1
Tredlse9m6udT3558GLNH9857qWdkS3aubvazqzSbHtOlnV6UVZBjo3d3o62bFOa1l3t9JDi
3ZppX2YrYjrtgJ17NmtnPNpCO80VVzu91PWHCguXW9MKSuxPlmbptTPc63gJfXqrOdE17A8V
5udYv1OSlW/P1rRzgV805O0qk1afaKmdOVlFRYVlTKedBk07qE9YUzuuz7wzs/J4nDOv7Wjz
M+ojjXusK975uUuL7MzXdm73n7tcdi4qLc6zZmQX2VfyEMtkeu1Eatpxqu08hO3EueJ0dlb+
stIC6/TCkjxQJlsnvpr35z7qjnms+Xag1Ma5LndnX3A6H890X/uxnb7yuOdnZS9neu1caXHc
+6Ef5hQW2LllrA8X8ggrKLbleLQz1J05vflhf7c/87xsncsdMaNkTb6NebZTr9FnkUnbzgB1
xwxb/ipbiT07i+m303K8x+N42bOLCosLc0usi7Nm2OxM005z+Sc0db16VYafQzjcaz/GK5Fr
MFxbiseWyWPL7LFlwa3N6lo550VWG+aKGtjfem3pRxZUqFChQoXKP7rAhflnTDzm+BNbZXLN
BKhQ6dhiSr233DXJjlDv8eYUFuTbC6y59hJrYa51mn3ZuDR+59Nf8XwUqd5o4L3C1NUrCwts
/B6V32ks4/dhJXlWG79dLbEXFnSaOeh9eJcZosa2E+D3MW+rd4UmL+fc7743gPKAei8fgbZV
pPsEvfI6S8I7Urm2uZkzHlTv0Vw55hbfvoXn3cLjJmn9ZZYntSifcUunZdGKGG/tcdGy/IBa
LufcfRGZUUi2oEVDWdPPysBCKerdpMcPycMlv4T7OrXeVOGGTSeIk5gl2n1b5jqhp/pYYmm+
Dfy+yFZcml9SrJGkOn8cs5o8TgTtHi4tWmXT0yuOhZtbrO0u4U13gCa1ttqGfsUQXyuG+lox
zNeK4b5WjLi94jT2CGg+aB/72SHKvlSoBGs5a5ayZphr+Zh0rNlZibQO6cPpNON1Q75+QILB
60rq1lSPBvYthe2Xf/rT11I8W45L1dneN+HbS9Olpba0dFyn1Ke0VEMkRlhqr9zMy5WcSXOE
/ex6KDz9j+JWjg75PvtISXb/WMs1q/iXP2/Y4NoSayb3mtm9ZnGvhbjXQt1rYe61cPdahHst
0r3WRSPNUwNaozVao7WOXCt3rz2tc7Rjc2KUe62re62be627e62He62ne62Xe623ey3avRbj
Xot1r93lXotzr/Vxr/V1r/Vzr/V3rw1wr8W71wa616zuteHutQT3WqJ7bbB7bYh7bah7bZhO
KyPcayPda6Pca0nutdHutenlSdL9s1iO6sEiFc3dq7h6zigvkuYW6tVUvaIrLV+z1Xrqtxh8
TvHn5q/t8ixBXV+DXxeYXO7ndP23WP2aoOmutTxFvvKL7e+o5y5+cPHYkbbVK4cvH7loRNdI
lq7ebjX35OV3Lov8J5sF97V59mL3IWt2VoF1qc2al1WUYy0phEc9ydbMojXW3NLiYnvBMmuZ
nTdUkmez2gvsatursvJLbdbcwiLrzGT2pjqRgx7MY2+KuR0VKlSoBEiZ70qOGeqzscVj2XKe
Ij2+ExLlt+6vOaAcwOe5CiRn13Woy8cfzZriWt3CLkS4rkOZWaXsPOTwBaFsmeVY2a4f15bx
FD5uzMxRi0Yv6qxGHzdmeef2upl6O8FfHiksXZoPV174vJe5/WXWnOHjR3Ren8kvgO4vJ3+h
QoUKlX9scWo+ze2EzZg0rFO/vd/GtrPH+R15Amcye019m639AZN7FohFvmU2fsaM1AXlkW6N
oCzUnb0u0t27GL/lh0dkD0a+laKuWXv2/EVKpfpEwtSMBRSv+mqLPG9ur3YXoB0U15y89XZ4
+ac/3RsEdjC5njG13g5uHQLVDtNTf4JfM+3kUekqubh8PYSxRn7wY9U+nrLg1xLNf8fkp7Kr
vJeadhQutj8zuV+DJrX0QK9rstsUFaphDElN3VsOy3dYD5QoPo2x5tnyVzZzZocYhW5R/2El
Fcb/vvlTpz8mjfRjrpHuLLeoe1P/rv5YEfq5LZQnAx5oP0n9qTve/s0jQd7NXD9vhKO7WamX
RLZ4rJ/jafEPeldNT6txv3loEq1oai73dyjfsn024Bf/++n3hTc0idb2HB58+VX0wvgTL0U8
9b19Yv7VJFr7AYmng/pBdNp9de89U5CJos2SaHnSGOEaa/+K3j9rwIhNo6rFWEd4F83H2r+i
r495bOmWde+haEUSbdFcMv3ea+vRq9/5+Vc73xcymkSHaET7vdc/+qbilczEWuHhkuhQjWjw
cL+Kdr2ZvIRvp02S6LBmnxL6XbRZEh2uuenx+1hHDs3+t2fZaeHhpibRERrRfh/rZNPvdzzR
9YjwcEl0pEa038d6919TP3o9P0JkM0l0F41ov4914pzTGU/9qyKymUk/pcBV8BHbsiKbrVj9
+p+v5BSu8MtMMDpVyPAuer61mLdYZGN+E/2n/++VI5cWirFuRnTa0uLC/NISmzWjdAV0PUNV
pLj1ot88czj68xf+gKJNzYjOWJO8mvlT9G8+Wd/n9Pg/omizJDpKvsVzxbV/Rf+57Jeb3uv6
aYoQ0iS6q0Y0j2v/im60nr81YeoRFC3PUrppRKuzFH+K/t6/nDm/b3tkKsNnEU2iu2tEe8a1
H0SPOH74g58/YULRerMURXeW4gfRu8cN3bb461+JsY7wLtozh/tB9Pnlc/YO7fuqGGtJdA/J
4Ep79Lr23P/O/F+7qkWvpYtmT41ov/d6nf1re9L1g6LXkuheGtGeVy4/iO4SYf71iN1m4eGS
6N4a0X738Ge3Fo39jyk3sNfyLCVaEm1qj7E+NXH0uif21Imxli6aMRrRfh/r5K6fHZzX9bgY
a0l0rEa038fanm2ZXbkhWoy1JPoujWi/j/WrxywPf/RElMhmJv2U4mWW0jbR8ixF0Z2lKN5n
KW0TveqvZ159ZPDXYqybEe33Wcpn6VmNn2fsQdGmZkT7fZZyNGlZ3oHn9om4lkTHSRPhdpml
ZP3IlN74t0MpQkiT6D4a0X6fpSjmK6+VTvnofZcQeZbSVyPa77OUHhk1m9+09trH8E1Bk+h+
GtF+j+ufpgwYs3RQBIrWm6WY2muWsu78v580b3pfjHWEd9F+z+FZp0aWLlQ+RtHyLKW/ZPB2
maU89O3pb+/9zm/RzeRZygCNaL/3+s9/nV+b+ubfhYdLouM1ov1+5ZIfaJg8ZikDNaL97uGe
ouVZilXz8tjvY7343x5cltDvtPBw6aI5SCPa72O9453/vNVl5DHh4ZLoBI1ov491//dfuvzQ
+avoZvIsJVEj2u9j3e/IC7W9f34eRevNUkwdMUsx6c5STO01S3n5NyM27vvyUzHWzYj2+yzl
758uPPDCsioUbWpGtN9nKc9+9/LuR3vuR9HmKP2X0m7Rmtt97593aM8wGT7DbPgM0oq0Iq1I
K9KKtCKtSCvSirTqLFrdi3/mLoydUVv6ovxxduZ3ClvyO8VDl8F846Dmvp51QAEd5H9nIpHv
+EB+2RbD2B97MmadOnsa1Aa9o82e36dAEd+vpfLz67VCTltY+Wtm9bFAOL6wimJNf1ath9T/
LprtWKwbh2+bxPdyMbhuxu8n5A+M46VnubJt++A5YNohTW+ly+GX6jnN2ECcP8ijZ+Up+uv6
RZYn7CD3R+wTuos/HdDIXH+8fRjud//JgPp6j3Zhv7Yf15jrT3OLtv6bMdV//dUPb7rCHztY
+auW9eB7lJb0EGEAPjoRngZwPn2NMdEG/PFCsa4wq+oPcFznSZn4PxUqVIK85ObmniotLXWu
XLmSIIgABOIX4liOa5vNdnzr1q3OM2fOOK9evUoQRAAC8QtxDPEsYhvi/fTp084LFy44Dx06
RBBEAALxC3EM8SxiG67nEPc1NTUEQQQwEMcQz3JsNzQ0OA8fPkwQRAADcUyxTRAU2wRBBHZs
19bWEgQRwFBsE0Tnie1r1645jx49ShBEAANxTLFNEBTbBEEEdmzX1dURBBHAUGwTROeJ7cbG
Rufx48cJgghgII4ptgmCYpsgiMCO7RMnThAEEcBQbBMExTZBEIEf26dOnSIIIoCh2CaIzhPb
169fd54/f54giAAG4phimyAotgmCCOzYhr+BShBE4EKxTRAU2wRBBH5sX7x4kSCIAIZimyA6
T2zfuHHDeenSJYIgAhiIY4ptgqDYJggisGO7vr6eIIgAhmKbIDpXbF++fJkgiACGYpsgKLYJ
ggjs2L5586bzypUrBEEEMBDHcmyXlpY6z507p37TQvYhiMAE4hfiGOJZxPayZbknt2/f7jx7
9qwa9wRBBB4QvxDHEM9MKkuWLDlYVlamXs8Jggg8IH4hjhkVKlSCuszkpHLGckI4Vo6C9JDq
NXJG6WwP5fTnmHC/gsv9+/ezIXwZhcf6YXui3t24fRW3Rd0wxsqHS+cl4LqTl0F8Gc7phftA
ViyuQ5kPzwUV13nXeH25n1Uo2GxSEmazDN7PDJbFClixumZjRczOcg3YreT7m80Wvvzm84/C
YD1NbSGL5WvqMLZHORsTxSy4L2mRa99Nvq/h2eyyycoeZTjfB32BpajHyl3knFlatmXnbz9x
7R9iduE61o2ZlTe5QWbEutqyoE26cwvAftgGZqEeYCmoB+sz+L5w64+77DJ1N1d2y4+sT+xu
PjNgs7mB67WLtzf4LpfOb/D152sqVsE5OatU8zOxlMdX2N6sY/ttCtm+vWwPCom4WCrFRU9p
faYUyxDjMXjMolmfxonGtjLnpKeH8pPn8fV9nAisF4exHCHFHcP2gXTMJeWYV6BsZF+7jw+X
6irubKFfwI1SbjGfGIjLDZzr4IuYy0D/B0zG9L8A5yhNyexPbJMX/cNv03mcRv+k6FB2bPU9
7ITjfpbUK5SN7h3GjpROYl9tmcqOrZnMj4eztx+1shE9Q9jHBWPZyQ33s7q1k9mB7BHsD+9e
Ynb7t2xsbAQ/lszq1kxi1UsGsy+PHWGf7HmD2XIb2HvfHcQO5gxlr8/qyy7+7XN2uraGPbb0
a7ZpaCjbOT6SvTSxC3t+WBjbu+crtvB7X7K9VVfY+S8+Y+kL/8qmz6tlU2Z+yCZN3ceSUt5i
iff+mvWf8CqLTv456zZyJ1OUsXJRFGVMfHz8GFgiyXFxccmwREbLhW8n8fpJsERG8fqjYImM
lAvfHsHrj4AlMnTYsGFD+XI4Yh2UkJA4eIir8G2lb79+/QfExw/k5w3km72jY2Ji74qL68Pl
9FGUqK7dunfv0bOXqyihYeERkUoXxV3MlhDFo5g8trTxEKZ4Xo/k/Bfn9qd9LB63RVw2YJzF
SjEpX8P6aa618jUtk7MJ4h7beh11gvM2Zu1KKzjx+zRxLBLyze0xpJbHVd8s41lyDY+LNDaH
zWUL+DIMYwGWoZgHwnFfBK6Ht6Cjr3OIwXzHQZ1tOZfFSe3KdoxBOya0wY4HOIuxrXewXdmO
4lh0M3Ys4euzWSm/1pTwa85KvrTx/mazQraCb2WpV6JivgVXtwi0qQn7ZpK2Q3FfKBIurYu6
IdK+kHYeA9mvh0vjIc/FhD/3wX319fWqXYWtRnISOVM0dpXtOEuaA0L9wZwU3D8Mx1sct9vt
Ju08Q8iGY1rZzKBsRZKt126iwT4l6vRJr10F20vwsV1RP1Fqd0jT2HudLxfx5csWlz+Pkfoh
tnu4fcMpXYjLU/TWxZQO5lgToV3mShb610Wr6jvuiZdnJIn/B1XJzs522Gw25xNPPOFcvny5
LnC8uTZyc3MdTz75pPr8ZfXq1bdRWFjYotm4fAe8b1m7dq1z3bp1HhQXF/tk9oKCAsdTTz3l
LC8vdz799NNuQAdf7cF1cMD5GzdudP7gBz9QcTgchoad98EB52/evNm5ZcsW5zPPPGPYbbje
DjgXnlX/8Ic/bJXbPffcc45t27Y5X3jhhVa7LZftaMv5UPj5jmCKGfl+/Woz9+t693fGSpT7
nu4feu9Y3rZ7R5DZlntH+Toq5g6hOtf167/5jcd1PQWvHRk+XltT8BqYqbmum/F4fffuJu09
rHtOwY9pZTODshVJtl67iQb7lKjTJ712FWwvwcd2Rf1EqV2967pZc13PxPrdUC+4ns/RyOsl
2WKWdCmW+5GO96thLfiDdp6XiTrn+TgmmSjT7sUftPM8czPzvExcGpGtSLK9zfOM9ClRp0/e
5nl5OHZ5PvpDHrZvb6U/ZKI/ZOv4Q6aOP8j9AH8Y3wp/sKPO630cEzvKdPjBH+y4NCJbkWR7
8wcjfUrU6ZM3f1iPY7feR39Yj+07WukPdvSH1Tr+YNfxB7kf4A8TWuEPDtR5h49j4kCZFX7w
BzFBMiJbkWR78wcjfUrU6ZM3f9iBY7fDR3/Yge1XtNIfHOgPL+j4g0PHH+R+pOO9n1F/qECd
d/s4JhUos9IP/lCBSyOyFUm2N38w0qdEnT5584fdOHa7ffSH3dh+ZSv9oQL94Zc6/lCh4w9y
P8AfJrXCHypR5yofx6QSZVb7wR8qxf2FAdmKJNubPxjpU6JOn7z5QxWOXZWP/lCF7Ve30h8q
0R/e0vGHSh1/kPuRju91jfpDNer8gY9jUo0yD/vBH6pxaUS2Isn25g9G+pSo0ydv+srPon3x
hxps/3Ar/aEa/eEDHX+o1vEHuR/gD/egPwgfEM/0G7y8AzAZ8J1GbCNRuf2diJ49RP3pius5
f1t9x8hYTFVul+3LWLRH/6f6of+ybGZQttKMjzeivxnpU7SmT77YVXy3Ym7muxWz9M6lUfPd
ynTF+3crZowfoD/WG6jA8x3P/sRLthMxpPXRdHyXY9F8Y3G1mW8s6HmZf5+Xye8ly8vLm81P
MCyyL8egL4/w0ZdjcOxHauJTepXiEZ8WL/5u8ZJHtO1p493ix3yn7Ysvesrvf1vzvLJRvLNT
fHu3JuqDnilebK59Xmlp5nmlURtpZeu1K/dppIE+QfujWmh3ikFbTcF2UwyMqZwLR2IuvFcn
F47UyYWyfeRcqPf9k7cYTME+ZvjYxxSUmdlBMVjft693/+LHWutfj/AKD2r60hF6NuJ3V0Zs
Pg/1NaKn/P2DlDdMsTo5xOzjuvDVbzig7C30O7kP4pjsq9+g30zFPus9W9fq2ZLfZqIN83y0
YSaOtT0Irh3avrRFT6dOv90258dkm+cZtHke6mu/g/x2AfqtTcdvF+j4bSb2Ic/LM1+jfmtH
G6730YZ2HGtHEPitti8d5bfrDdp8PerruAP8Ngf9cDncW3GdntLx2+Viji/5rR37sB7bGcuS
OZNU37WgD7fFjx1o0x0+2tSBY18RBH6s7UtH+fEOgzbfgfq2Rk9v416BOuz2UYcKtFVlEIy7
ti8dNe67Ddp8N+pbeQfkr02Yj17EPryik7/gWKQmf1VgH6Avj6vfFdvU38VY2SPqL2JyeT7r
IuUxkdciULbA0oYcV4k6V/lo90r0j+og8HVtXzrK16sM2rwK9a32Y46rRh0+8FGHarTV4SAY
d21fOmLcjerZiO9uphrUs71y3GrMWe+DPB2/EcfCNDmuGvsAfVnCGa3O0ibw/96rPku3SHkt
TIO3vuj9Bses845J2Fr8VlXUFfc/OZLdr+GzJnHOf8MzbLXNeqmW/rfx3oo8Xt50gm/0V/6q
ZT1a+43+p68xJtoAnxHr4ht9OH57Cc5v9KlQoXJ7yc3NPQW/GaG/fUIQgQnEL8SxHNc2m+34
1q1bnWfOnHFevXqVIIgABOIX4hjiWcQ2xPvp06edFy5ccB46dIggiAAE4hfiWP4buXA9h7iv
qakhCCKAgTjW/rsVDQ0NzsOHDxMEEcBAHFNsEwTFNkEQgR3btbW1BEEEMBTbBNF5YvvatWvO
o0ePEgQRwEAcU2wTBMU2QRCBHdt1dXUEQQQwFNsE0Xliu7Gx0Xn8+HGCIAIYiGOKbYKg2CYI
IrBj+8SJEwRBBDAU2wRBsU0QRODH9qlTpwiCCGAotgmi88T29evXnefPnycIIoCBOKbYJgiK
bYIgAju24W+gEgQRuFBsEwTFNkEQgR/bFy9eJAgigKHYJojOE9s3btxwXrp0iSCIAAbimGKb
ICi2CYII7Niur68nCCKAodgmiM4V25cvXyYIIoCh2CYIim2CIAI7tm/evOm8cuUKQRABDMSx
HNulpaXOc+fOqd+0kH0IIjCB+IU4hngWsb1sWe7J7du3O8+ePavGPUEQgQfEL8QxxDOTypIl
Sw6WlZWp13OCIAIPiF+IY0aFCpWgLjM5qZyxnBCOlaMgPaR6jZxROttDOf05Ftyv4HL//v1s
CF9G4bF+2J4Jj9+N21dxW9QNY6x8uHReAq47eRnEl+GcXrgPZMXiOpT58FxQcZ13jdeX+1mF
gs0mJWE2y+D9zGBZrIAVq2s2VsTsLNeA3Uq+v9kMcr75/KMwWE9TW8hi+Zo6jO1RzsZEue2T
tMi17ybf1/BsdtlkZY8ynO+DvsBS1GPlLnLOLC3bsvO3n7j2DzG7cB3rxszKm9wgM2JdbVnQ
Jt25lWG/BW04C/UAS0E9WJ/B94Vbf9xll6m7ubJbfmR9YnfzmQGbzQ1cr128vcF3uXR+g68/
X1OxCs7JWaWan4mlPL7C9iE6tt+mkO3by/ZgbxEXS6W46Cmtz5RiGerHSOMmr0/jRGNbmXPS
00P5yfP4+j5OBNaLw1iOkOKOYftAOuaScswrUDayr93Hh0t1FXe20C/gRim3mE8MxOUGznXw
RcxloP8DJmP6X4BzlKZk9ie2yYv+4bfpPE6jf1J0KDu2+h52wnE/S+oVykb3DmNHSiexr7ZM
ZcfWTObHw9nbj1rZiJ4h7OOCsezkhvtZ3drJ7ED2CPaHdy8xu/1bNjY2gh9LZnVrJrHqJYPZ
l8eOsE/2vMFsuQ3sve8OYgdzhrLXZ/VlF//2OTtdW8MeW/o12zQ0lO0cH8lemtiFPT8sjO3d
8xVb+L0v2d6qK+z8F5+x9IV/ZdPn1bIpMz9kk6buY0kpb7HEe3/N+k94lUUn/5x1G7mTKcpY
uSiKMiY+Pn4MLJHkuLi4ZFgio+XCt5N4/SRYIqN4/VGwREbKhW+P4PVHwBIZOmzYsKF8ORyx
DkpISBw8xFX4ttK3X7/+A+LjB/LzBvLN3tExMbF3xcX14XL6KEpU127du/fo2ctVlNCw8IhI
pYviLmZLiOJRTB5b2ngIUzyvR3L+i3P70z4Wj9siLhswzmKlmJSvYf0011r5mpbJ2QRxj229
jjrBeRuzdqUVnPh9mjgWCfnm9hhSy+Oqb5bxLLmGx0Uam8PmsgV8GYaxAMtQ7Es47ovA9fAW
dPR1DjGY7ziosy3nsjipXdmOMWjHhDbY8QBnMbb1DrYr21Eci27GjiV8fTYr5deaEn7NWcmX
Nt7fbFbIVvCtLPVKVMy34OoWgTaFqYcZl6HS0ozLULRxqLTfhPYQ+0LaeQxkvx4ujYc8FxP+
3Af31dfXq3YFWw3mjIRrP2eKxq6yHWdh30R9mEem4P5hON7iOmy3203aeYaQDceE7AaDsht0
ZOu1Oxjbu2qgT1OwfdHukKYx8jqvFXXMOjaGa4isTwr2M8NHfVKwn5lebCym5LKNfdFZ6Klt
r75vX69jBseEHmDTBw30RdSX+9IWPZ06/XbbnB+TbQ76XTFg8wzU14iecixLOdAk75f9xJd1
kP823qOBsttwfiP3QRzrhbpasH4K+nEGzqXm8Jy3gs8wYbZu5fktl/83l+e7FTzf5XNsmO/g
OtIFl2GsaR4chjpZcCnqmSXEOd5s0VJsZKI/5fk4TpnoT/YOig0j+cxIXxp0+tJRsZGHvu6r
zfNQX/sdEBtRisvXF3DOcWw6sbEAr6VybGRiH6AvW7zEhv6MwMr3uGo1xc4an+MmzEs9OXbk
/dq29OKuLfFmRx9d7+PY29FHHXdgvBnpS4NOXzoq3tZjvPlq8/Wor+MOiLd8jJ/l+KzhKZ14
W47zTjne7NgH6Msi9XqVz+Moj0eQ6x5F6/+t9WcH+sAOH23rQB+ouAP92UhfGnT60lH+vAP9
2Veb70B9W6Ont3GvQFvt9lGHCrRV5R047kb60qDTl44a99047r7afDfqW3kH5LGTmJde5Ozl
vKKTx15EmXIeq8A+QF/WcR7lcwKYJxTx/9n4Wgn/bw6fG0xTZwx56kxhmDprmMXn4Y+45wl6
cwS9a364Tm60oE3l+uJZT2vzZiX6XJWPY1mJPld9B8aPkb406PSlo+KnCuPHV5tXob7Vfsyb
1WirD3zUoRptdfgOHHcjfWnQ6UtHjLv2WaQvNq9BfQ/fAXnzJubB9zmf6NhaHBugyZvV2Ica
fBZu5f9bqN47QbYs4XdQK9WnsKt4rkzmy3R+L/awmlOn8zliCWcCv98ao75jFDmzq+YeSJtL
xb4QzfEIKWeK+pE6+Vd+1uHNnrLN5fVu+AxavJeKVuUl8f/OLcqxF2QVrbEWFthGl2WtsabN
mbsgzVqYa51mXzYuzbqsqLCsJM9alFVi41r158adzxWYZWnyG8XkWsq+1BHfGSg4/xclUXGN
vyi7Yxj7Y08+tlNnT4PaS36nsGiz69m3x7tkvqMv708qP79eK+S0hZW/ZnY/QxXvQMX7jB7S
8264B75P3QMGCOMSb3DAGm+rYySe0culN+d+d9Q+oI5IpPrOl4mWmi0P4tcPL6saiS8hpqAc
hd3LzrnbFDYzSb4k3geESX1KUb++MCHqC0tLtHtkLepbAThHdRS92ty7FI/a8AZkdml+iX1l
vs2aXbhiZVaRvbiwoFg62V3CXdtwskk9WW1Sv6LZ14oWXyuG+Fox1NeKYb5WDPe1YsTtFaex
R7jmJu4xa7vSB0hUqARLcfq5POa+2JjxgqBIWw1Kg2LhCUfdt2/Ct5em36lLkRQf85zsS31p
uuApXo41KC4s0sXrNfVyafFh6iGKb2eYDJ9hNnwGaUVakVakFWlFWpFWpBVpRVp1Fq3uTf2i
3PUS6nF25neuh32yDtqPVDvzQ0p5WzxIhgeU8ofPMdKD9kjm+cGv+Ihaa1v5pY78UgAevOc0
YwNx/iCPnpWn6K/rF1me3o+6xD6hu7gfFj86Ey9QhM/Ah8hyu7Bf2w94uTNSauu/+XqSH/vh
TdcizspftawH36O0pIcIA/DRieqDZMY+fY0x0Qa80BHrCrOq/gDHdZ5UiP9ToUIlyEtubu4p
+CM89McNCCIwgfiFOJbj2mazHd+6davzzJkzzqtXrxIEEYBA/EIcQzyL2IZ4P336tPqPsh86
dIggiAAE4hfiWP4jmHA9h7ivqakhCCKAgTjW/mH6hoYG5+HDhwmCCGAgjim2CYJimyCIwI7t
2tpagiACGIptgug8sX3t2jXn0aNHCYIIYCCOKbYJgmKbIIjAju26ujqCIAIYim2C6Dyx3djY
6Dx+/DhBEAEMxDHFNkFQbBMEEdixfeLECYIgAhiKbYKg2CYIIvBj+9SpUwRBBDAU2wTReWL7
+vXrzvPnzxMEEcBAHFNsEwTFNkEQgR3b8DdQCYIIXCi2CYJimyCIwI/tixcvEgQRwFBsE0Tn
ie0bN244L126RBBEAANxTLFNEBTbBEEEdmzX19cTBBHAUGwTROeK7cuXLxMEEcBQbBMExTZB
EIEd2zdv3nReuXKFIIgABuJYju3S0lLnuXPn1G9ayD4EEZhA/EIcQzyL2F62LPfk9u3bnWfP
nlXjniCIwAPiF+IY4plJZcmSJQfLysrU6zlBEIEHxC/EMaNChUpQl5mcVM5YTgjHylGQHlK9
Rs4one2hnP4cE+5XcLl//342hC+j8Fg/bE/Uuxu3r+K2qBvGWPlw6bwEXHfyMogvwzm9cB/I
isV1KPPhuaDiOu8ary/3swoFm01KwmyWwfuZwbJYAStW12ysiNlZrgG7lXx/s9nCl998/lEY
rKepLWSxfE0dxvYoZ2OimAX3JS1y7bvJ9zU8m102WdmjDOf7oC+wFPVYuYucM0vLtuz87Seu
/UPMLlzHujGz8iY3yIxYV1sWtEl3bgHYD9vALNQDLAX1YH0G3xdu/XGXXabu5spu+ZH1id3N
ZwZsNjdwvXbx9gbf5dL5Db7+fE3FKjgnZ5VqfiaW8vgK25t1bL9NIdu3l+1BIREXS6W46Cmt
z5RiGWI8Bo9ZNOvTONHYVuac9PRQfvI8vr6PE4H14jCWI6S4Y9g+kI65pBzzCpSN7Gv38eFS
XcWdLfQLuFHKLeYTA3G5gXMdfBFzGej/gMmY/hfgHKUpmf2JbfKif/htOo/T6J8UHcqOrb6H
nXDcz5J6hbLRvcPYkdJJ7KstU9mxNZP58XD29qNWNqJnCPu4YCw7ueF+Vrd2MjuQPYL94d1L
zG7/lo2NjeDHklndmkmseslg9uWxI+yTPW8wW24De++7g9jBnKHs9Vl92cW/fc5O19awx5Z+
zTYNDWU7x0eylyZ2Yc8PC2N793zFFn7vS7a36go7/8VnLH3hX9n0ebVsyswP2aSp+1hSylss
8d5fs/4TXmXRyT9n3UbuZIoyVi6KooyJj48fA0skOS4uLhmWyGi58O0kXj8JlsgoXn8ULJGR
cuHbI3j9EbBEhg4bNmwoXw5HrIMSEhIHD3EVvq307dev/4D4+IH8vIF8s3d0TEzsXXFxfbic
PooS1bVb9+49evZyFSU0LDwiUumiuIvZEqJ4FJPHljYewhTP65Gc/+Lc/rSPxeO2iMsGjLNY
KSbla1g/zbVWvqZlcjZB3GNbr6NOcN7GrF1pBSd+nyaORUK+uT2G1PK46ptlPEuu4XGRxuaw
uWwBX4ZhLMAyFPNAOO6LwPXwFnT0dQ4xmO84qLMt57I4qV3ZjjFox4Q22PEAZzG29Q62K9tR
HItuxo4lfH02K+XXmhJ+zVnJlzbe32xWyFbwrSz1SlTMt+DqFoE2NWHfTNJ2KO4LRcKldVE3
RNoX0s5jIPv1cGk85LmY8Oc+uK++vl61q7DVSE4iZ4rGrrIdZ0lzQKg/mJOC+4fheIvjdrvd
pJ1nCNlwTCubGZStSLL12k002KdEnT7ptatgewk+tivqJ0rtDmkae6/z5SK+fNni8ucxUj/E
dg+3bzilC3F5it66mNLBHGsitMtcyUL/umhVfcc98fKMJPH/oCrZ2dkOm83mfOKJJ5zLly/X
BY4310Zubq7jySefVJ+/rF69+jYKCwtbNBuX74D3LWvXrnWuW7fOg+LiYp/MXlBQ4Hjqqaec
5eXlzqefftoN6OCrPbgODjh/48aNzh/84AcqDofD0LDzPjjg/M2bNzu3bNnifOaZZwy7Ddfb
AefCs+of/vCHrXK75557zrFt2zbnCy+80Gq35bIdbTkfCj/fEUwxI9+vX23mfl3v/s5YiXLf
0/1D7x3L23bvCDLbcu8oX0fF3CFU57p+/Te/8biup+C1I8PHa2sKXgMzNdd1Mx6v797dpL2H
dc8p+DGtbGZQtiLJ1ms30WCfEnX6pNeugu0l+NiuqJ8otat3XTdrruuZWL8b6gXX8zkaeb0k
W8ySLsVyP9LxfjWsBX/QzvMyUec8H8ckE2XavfiDdp5nbmael4lLI7IVSba3eZ6RPiXq9Mnb
PC8Pxy7PR3/Iw/btrfSHTPSHbB1/yNTxB7kf4A/jW+EPdtR5vY9jYkeZDj/4gx2XRmQrkmxv
/mCkT4k6ffLmD+tx7Nb76A/rsX1HK/3Bjv6wWscf7Dr+IPcD/GFCK/zBgTrv8HFMHCizwg/+
ICZIRmQrkmxv/mCkT4k6ffLmDztw7Hb46A87sP2KVvqDA/3hBR1/cOj4g9yPdLz3M+oPFajz
bh/HpAJlVvrBHypwaUS2Isn25g9G+pSo0ydv/rAbx263j/6wG9uvbKU/VKA//FLHHyp0/EHu
B/jDpFb4QyXqXOXjmFSizGo/+EOluL8wIFuRZHvzByN9StTpkzd/qMKxq/LRH6qw/epW+kMl
+sNbOv5QqeMPcj/S8b2uUX+oRp0/8HFMqlHmYT/4QzUujchWJNne/MFInxJ1+uRNX/lZtC/+
UIPtH26lP1SjP3yg4w/VOv4g9wP84R70B+ED4pl+g5d3ACYDvtOIbSQqt78T0bOHqD9dcT3n
b6vvGBmLqcrtsn0Zi/bo/1Q/9F+WzQzKVprx8Ub0NyN9itb0yRe7iu9WzM18t2KW3rk0ar5b
ma54/27FjPED9Md6AxV4vuPZn3jJdiKGtD6aju9yLJpvLK42840FPS/z7/My+b1keXl5s/kJ
hkX25Rj05RE++nIMjv1ITXxKr1I84tPixd8tXvKItj1tvFv8mO+0ffFFT/n9b2ueVzaKd3aK
b+/WRH3QM8WLzbXPKy3NPK80aiOtbL125T6NNNAnaH9UC+1OMWirKdhuioExlXPhSMyF9+rk
wpE6uVC2j5wL9b5/8haDKdjHDB/7mIIyMzsoBuv79vXuX/xYa/3rEV7hQU1fOkLPRvzuyojN
56G+RvSUv3+Q8oYpVieHmH1cF776DQeUvYV+J/dBHJN99Rv0m6nYZ71n61o9W/LbTLRhno82
zMSxtgfBtUPbl7bo6dTpt9vm/Jhs8zyDNs9Dfe13kN8uQL+16fjtAh2/zcQ+5Hl55mvUb+1o
w/U+2tCOY+0IAr/V9qWj/Ha9QZuvR30dd4Df5qAfLod7K67TUzp+u1zM8SW/tWMf1mM7Y1ky
Z5Lquxb04bb4sQNtusNHmzpw7CuCwI+1fekoP95h0OY7UN/W6Olt3CtQh90+6lCBtqoMgnHX
9qWjxn23QZvvRn0r74D8tQnz0YvYh1d08hcci9TkrwrsA/TlcfW7Ypv6uxgre0T9RUwuz2dd
pDwm8loEyhZY2pDjKlHnKh/tXon+UR0Evq7tS0f5epVBm1ehvtV+zHHVqMMHPupQjbY6HATj
ru1LR4y7UT0b8d3NVIN6tleOW405632Qp+M34liYJsdVYx+gL0s4o9VZ2gT+33vVZ+kWKa+F
afDWF73f4Jh13jEJW4vfqoq64v4nR7L7NXzWJM75b3iGrbZZL9XS/zbeW5HHy5tO8I3+yl+1
rEdrv9H/9DXGRBvgM2JdfKMPx28vwfmNPhUqVG4vubm5p+A3I/S3TwgiMIH4hTiW49pmsx3f
unWr88yZM86rV68SBBGAQPxCHEM8i9iGeD99+rTzwoULzkOHDhEEEYBA/EIcy38jF67nEPc1
NTUEQQQwEMfaf7eioaHBefjwYYIgAhiIY4ptgqDYJggisGO7traWIIgAhmKbIDpPbF+7ds15
9OhRgiACGIhjim2CoNgmCCKwY7uuro4giACGYpsgOk9sNzY2Oo8fP04QRAADcUyxTRAU2wRB
BHZsnzhxgiCIAIZimyAotgmCCPzYPnXqFEEQAQzFNkF0nti+fv268/z58wRBBDAQxxTbBEGx
TRBEYMc2/A1UgiACF4ptgqDYJggi8GP74sWLBEEEMBTbBNF5YvvGjRvOS5cuEQQRwEAcU2wT
BMU2QRCBHdv19fUEQQQwFNsE0bli+/LlywRBBDAU2wRBsU0QRGDH9s2bN51XrlwhCCKAgTiW
Y7u0tNR57tw59ZsWsg9BBCYQvxDHEM8itpctyz25fft259mzZ9W4Jwgi8ID4hTiGeGZSWbJk
ycGysjL1ek4QROAB8QtxzKhQoRLUZSYnlTOWE8KxchSkh1SvkTNKZ3sopz/HgvsVXO7fv58N
4csoPNYP2zPh8btx+ypui7phjJUPl85LwHUnL4P4MpzTC/eBrFhchzIfngsqrvOu8fpyP6tQ
sNmkJMxmGbyfGSyLFbBidc3Gipid5RqwW8n3N5tBzjeffxQG62lqC1ksX1OHsT3K2Zgot32S
Frn23eT7Gp7NLpus7FGG833QF1iKeqzcRc6ZpWVbdv72E9f+IWYXrmPdmFl5kxtkRqyrLQva
pDu3Muy3oA1noR5gKagH6zP4vnDrj7vsMnU3V3bLj6xP7G4+M2CzuYHrtYu3N/gul85v8PXn
aypWwTk5q1TzM7GUx1fYPkTH9tsUsn172R7sLeJiqRQXPaX1mVIsQ/0Yadzk9WmcaGwrc056
eig/eR5f38eJwHpxGMsRUtwxbB9Ix1xSjnkFykb2tfv4cKmu4s4W+gXcKOUW84mBuNzAuQ6+
iLkM9H/AZEz/C3CO0pTM/sQ2edE//Dadx2n0T4oOZcdW38NOOO5nSb1C2ejeYexI6ST21Zap
7Niayfx4OHv7USsb0TOEfVwwlp3ccD+rWzuZHcgewf7w7iVmt3/LxsZG8GPJrG7NJFa9ZDD7
8tgR9smeN5gtt4G9991B7GDOUPb6rL7s4t8+Z6dra9hjS79mm4aGsp3jI9lLE7uw54eFsb17
vmILv/cl21t1hZ3/4jOWvvCvbPq8WjZl5ods0tR9LCnlLZZ4769Z/wmvsujkn7NuI3cyRRkr
F0VRxsTHx4+BJZIcFxeXDEtktFz4dhKvnwRLZBSvPwqWyEi58O0RvP4IWCJDhw0bNpQvhyPW
QQkJiYOHuArfVvr269d/QHz8QH7eQL7ZOzomJvauuLg+XE4fRYnq2q179x49e7mKEhoWHhGp
dFHcxWwJUTyKyWNLGw9hiuf1SM5/cW5/2sficVvEZQPGWawUk/I1rJ/mWitf0zI5myDusa3X
USc4b2PWrrSCE79PE8ciId/cHkNqeVz1zTKeJdfwuEhjc9hctoAvwzAWYBmKfQnHfRG4Ht6C
jr7OIQbzHQd1tuVcFie1K9sxBu2Y0AY7HuAsxrbewXZlO4pj0c3YsYSvz2al/FpTwq85K/nS
xvubzQrZCr6VpV6JivkWXN0i0KYw9TDjMlRamnEZijYOlfab0B5iX0g7j4Hs18Ol8ZDnYsKf
++C++vp61a5gq8GckXDt50zR2FW24yzsm6gP88gU3D8Mx1tch+12u0k7zxCy4ZiQ3WBQdoOO
bL12B2N7Vw30aQq2L9od0jRGXue1oo5Zx8ZwDZH1ScF+ZvioTwr2M9OLjcWUXLaxLzoLPbXt
1fft63XM4JjQA2z6oIG+iPpyX9qip1On326b82OyzUG/KwZsnoH6GtFTjmUpB5rk/bKf+LIO
8t/GezRQdhvOb+Q+iGO9UFcL1k9BP87AudQcnvNW8BkmzNatPL/l8v/m8ny3gue7fI4N8x1c
R7rgMow1zYPDUCcLLkU9s4Q4x5stWoqNTPSnPB/HKRP9yd5BsWEknxnpS4NOXzoqNvLQ1321
eR7qa78DYiNKcfn6As45jk0nNhbgtVSOjUzsA/Rli5fY0J8RWPkeV62m2Fnjc9yEeaknx468
X9uWXty1Jd7s6KPrfRx7O/qo4w6MNyN9adDpS0fF23qMN19tvh71ddwB8ZaP8bMcnzU8pRNv
y3HeKcebHfsAfVmkXq/yeRzl8Qhy3aNo/b+1/uxAH9jho20d6AMVd6A/G+lLg05fOsqfd6A/
+2rzHahva/T0Nu4VaKvdPupQgbaqvAPH3UhfGnT60lHjvhvH3Veb70Z9K++APHYS89KLnL2c
V3Ty2IsoU85jFdgH6Ms6zqN8TgDzhCL+PxtfK+H/zeFzg2nqjCFPnSkMU2cNs/g8/BH3PEFv
jqB3zQ/XyY0WtKlcXzzraW3erESfq/JxLCvR56rvwPgx0pcGnb50VPxUYfz4avMq1Lfaj3mz
Gm31gY86VKOtDt+B426kLw06femIcdc+i/TF5jWo7+E7IG/exDz4PucTHVuLYwM0ebMa+1CD
z8Kt/H8L1XsnyJYl/A5qpfoUdhXPlcl8mc7vxR5Wc+p0Pkcs4Uzg91tj1HeMImd21dwDaXOp
2BeiOR4h5UxRP1In/8rPOrzZU7a5vN4Nn0GL91LRqrwk/t+5RTn2gqyiNdbCAtvosqw11rQ5
cxekWQtzrdPsy8alWZcVFZaV5FmLskpsXKv+3LjzuQKzLE1+A47hlN7POjXvaturKDj/FyVR
cY2/KLtjGPtjTz62U2dPg9pLfqewaLPr2bfHu2S+oy/vTyo/v14r5LSFlb9mdj9DFe9AxfuM
HtLzbrgHvk/d05vHWBiXeIMD1nhbHSPxjF4uvTn3q60p2MID6qhEqu99Xe07WygPqh5tZhOl
upOk9bul9ZfVJwzi7cHEFlqfxG4fWbnc3cLxKdhfhd3Lzrn7JcbOJPm0eC8RJtk2Rf0KxISo
L04t0W45FvXtBJyjOqxebe7likdteBMzuzS/xL4y32bNLlyxMqvIXlxYUCyd7C7hrm042aSe
rDapX9Hsa0WLrxVDfK0Y6mvFMF8rhvtaMeL2itPYI1xzE/fatV3pQygqVIKlOP1cHnNPVc14
QVCkrQalQbHwhKPu2zfh20vT79SlSIqPed50SH1puuApXo41KC4s0sXrp+7W/s39cYZ4QR+L
snazUiktQ4K/hVPtaf4e/qj71mUO/P4k9fOrW04W2yRa0YhOt67Kyi+1+U/0wQ0fVA197/IU
l2hFEm2SRN8FE0CYtZYUlmTle1zc21rCRa/vahJt1hNdbF9WYM+1Z2cVlPhVAd5rSbRFEg2f
syy05+dYS9astFlXFSdb05c+XGSbnlWSNSF3TG6rJR5I+vTI+9jr+CbRIS2Lnj/+7ukTpk9o
fWe/+Z8RH6ZgryXRoRrRHv30k/jPX/zd5yjaJIkOk0T3bcHgrRK9ZF/DuOVXuwk369skOrxl
0e4et0r0V6MSv9l0TwiKViTRERrRfjd4QmOXmKdi+qJokyQ6UhI9qD0M/k7F3KlfrZiPY80G
NYnu0rLothl88yupx795aZvwcEl0lEa03w3+l02f/mbejz7FRGqSRHeVRMMXYQ/xe/6C0dMK
i4rXlOTZrNNYW0W7rvmXNqDB+zWJ7ta86HQ/i1Yk0d21orOKSvJtJSW8v/4RPaNPbeyiXw0X
Hi6J7uFNdLqfRL9w9eKCfx+XhW5mlkT31Iieby1+sjSryMb8JTrnq39fsWjrlyjaIonuJYmG
B3JDrOlFhUuzltrz7SVr4AJaUJqfb53BWp/D3zwT+/BzJSKuBzSJ7t2S6Kz8EltRQVaJfZWN
a2C8rHjl6rlfOxeJRCqJjtaIns+FFILIlW4N7LZi1nrRnlMFkyQ6RiP6EXturq3IVpBts9oL
rGnfeTibtU1030mh3bd8PAF7bR7wmvqQRzsPFqLlubAovp1hMnyG2fAZpBVpRVqRVqQVaUVa
kVakFWnVWbT6IvXectfzpgj1fmVOYUE+v0PItZeIDwEeaublP5w5dfXKwgJbQYk9K198MmDj
95X8Vqeg7bcVAfKO5D78WVwIt6PCnOrLf/i5TJxmfOTS9PIfbswfUH8cJ16s9sIbV2/vUF53
v1KXa0c3c8aDbLzqGXPwphCYi+tQ0qX1ebgOY/iy+pGMePosn31LR4poUYy99riQ4u3dkpAs
xl57vC2fErjfw4RLPszgBTbUmypcVv/bA8XjBBiwzKyl+TaIkSJbcWl+SbFGkhooccxq8jgR
tHu4tGiVTU+vOBZubrF207uJzvJNARu0j/2hjt7DUqESrOWsWcqaYa7lY9Kx5orJ45G/icEn
X66rhXz9gASD153UrakeDexbCtsv//Snr6V4thyXqrOt/RZAW1o6rlPqU3x5lSGuJBbNdZF5
ueozaT4xvTxJmluK5ageLBLW50lXd3H2jPIiybZqa2qPlJZ1VuvB6zSw6Z+b75tsJXV9Df5h
Jy75X/68YYPT9d9i9WeTTVft8hS552L7O+q5ix9cPHakbfXK4ctHLhrRNZKlq5eb5mapv3NZ
5D/V74Qz8+zF7kPW7KwC61KbNS+rKMdaUgjT4mRrZtEaa25pcbG9YJm1zM4bgrcn9gK72rb6
CYQ1t7DIOjOZvamaFXowj70pfJsKFSpUAqTMdyXHDPXeYPFY+E1tpscfgRHltx5/wOoA3vsq
kJzVFMi6fPzRrCmu1S3sQoTrOpSZVcrOQw5fEMqWWY6V7fpxbRlP4ePGzBy1aPSizmr0cWOW
d26vm6m3E/zlkcLSpflw5c20r7Axt7/MmjN8/IjO6zP5BdD95eQvVKhQofKPLX76HWQgN2PS
sE793nMb284e53fkCZzJXt5WuWeBWORbZuNnzEhdUB6JGs1Rlwt1Z6+LdPcubvoFRuoXTz2b
ojDxpKhSfSJhasYCild9tUWeN7dXuwvQDgpve25b7MB7v9dlB2vPnr8IWDvAE6Z0sgMz87bn
deq4mJ76k3JXltrJs5NLRi7Wej2EsUa+42PVPp6y4KcRfn337a3sKu+lpl/4oVx/ZnI/Dk9q
6cFm12S3KSpUwxiSmrq3HJbvsB4oUbwitebZ8lc2c2aHGIVu1f9hJRXG/775U6c/Jo30Y66R
7iy36ntT/+7+S9Hir0j8JNXbTzfhA/uxTO+nm5Bk5oikOtbP8bQzfPG+2XP2qm9g5niIVjSi
l/s7lK89WFvcN/L0+y7RCvP86aYsGh4A+lX0vn/6sKYu6yaKNjHPn27Koj0d1A+iv076LHH2
f1xF0WZJNEyehegI11j7V3TYhhsZD20sFWMd4V00H2v/iq4r6/mT5/L/A0UrEZ4/WBWilfbo
9fJn33r3s7o9oteK5w9WZdF+7/VnU1NKFv/sS+HhiucPVmXR4OF+Ff3C9V/9aAcz70MPVzx/
sCqL9ruHX4h+8513Fl4XHq54/mBViDa1x1jv33L9wLv7q8RYmzx/sCqL9vtYx+Yf/vL3l4+L
sTZ5/mBVFu33sf7JP4+sOPNqo8hmJs8frMqi/T7WO+dW9fiJ7ZIYa5N+SoGr4CO2ZUU2W7H6
xShfySlc4ZeZYHQqjnWUd9HuHzH6S/RPLppnPrzkkshmzYhOW1pcmF9aYrNmlK6ArmeoihS3
XnTt36Pe/lHCYBRtakZ0xprk1cyfou/+zntPJry5CkWbozx/nAyi5zbNUvwr+v/Pnv18Xu8j
qui5HrOUrhrRPK79K/rNorRX/m/hcRQtz1K6aUSrsxR/iv5Rw3Pzb3zPnOoSLc9SumtEe8a1
H0QPvJV5cvJfrmOv9WYpc3VnKX4Qvf6tONvlt94QYx3hXbRnDveD6KWzwx7Y+fUrYqwjPH+S
LUQr7dHrXzgHTrpauU/0WvH8SbYs2u+9nvjpL197ZY8ILnmW0ksj2vPK5QfR/X7W8PWOz2+h
aHmW0lsj2u8e/se3fr8ufNk14eGK50+yhWhTe4z18Q8iVy88fEqMtcnzJ9myaL+P9UuRK+fW
//hzMdaS6FiNaL+P9acX/v5fo69HiGwmib5LI9rvYz34fGjFC4oJRevNUuZ6n6W0TbQ8S5mr
O0uZ632W0jbRCw7808bB4y+JsW5GtN9nKX/93a4V72z8WMR1M6L9PksZ9rOfPzPF8aGIa0l0
HLpZenvNUvr13XxmgO3/qKLTPWYpfTSi/T5LWfDQXXH7R59F0fIspa9GtN9nKf9T9bOvGpKu
oWh5ltJPI9rvcX29T9lrkf90EUXrzVLS22uWYokuXHnuX38ixjrCu2i/5/BrE/pfefTbvWKs
JdH9JYO3yyxl0TelSQcfr3gfey1dNAdoRPu918u/8z9/e+21z0SvJdHxGtF+v3Ktylywcd3a
S8LDJdEDNaL97uE5r34Vbj/8X8LDJdFWSXS7zFLG7aq8NPfBt4WHSxfNQRrRfh/rG5fu+tdF
D9eLsZZEJ2hE+32sY/5Wsv/lUa5/STbdY5aSqBHt97E++79+Nva9JxrFWJv0U0q7z1LSdWcp
6e01S9nRNyFt+pWvxVg3I9rvs5Q/fbHjs72hR0RcNyPa77OUoaO2vX3X3YfEWEuiB6ObzWuv
WcrD/9Mnd3G/N1XR8zxmKUM0ov0+S3npvUmJ3zd/9L5LtDxLGaoR7f9nKX0PzTs+rdc+l2h5
ljJMI9rvcf3U8NeXP7IgAkXrzVLmtdcsJXTX3KrJZ/5VjHWEd9F+z+Hdnpv9h2eHf4Ci5VnK
cMng7TJLYf3Kk3p1XYxuJs9SRmhE+73Xn3b9y28L/vZfwsMl0SM1ov1+5ZL/lOE8j1nKKI1o
v3u4p2h5lpIkiW6XWcqa/yn6YfHsA8LDpYvmaI1ov4911DvflP9+4yHh4ZLoZI1ov4/1G/fe
9Z1xOf+NbibPUsZoRPt9rPt+bj39u7vrUbTeLGVeR8xS5unOUua11yzlm7nn39i/5LAY62ZE
+32W0vDIhclnB65H0aZmRPt9lpJ5ypZwZM7/QdHmKP1P59yipe96RPHtDJPhM8yGzyCtSCvS
irQirUgr0oq0Iq1Iq86i1b34Bxyj2Bm1pS/KH2ebevC1HiYPXcS/VSjf17MOKEb/rUbQu73/
rUZ5W/x7mnH4TYz4qj+GNf17o5F4jijxWF9rW/nftpX/bVT4u0I5zdhAnD/Io2flKfrr+kWW
J+wg90fsE7qLP/R0n+J6iCT+HVn3H3iqr/doF/br9WOk1Nb9iuupkL/64U1X+NNUY//Ssh58
j9KSHiIMwEfhX8V8GXytjjHRBjzRFOsKs6r+sE33zxE6xf+pUKFCpVOV3NzcU6Wlpc6VK1cS
BEEEPJDPIK/Jec5msx3funWr88yZM86rV68SBEEEPJDPIK9BfhO5DvLf6dOnnRcuXHAeOnSI
IAgi4IF8BnkN8pvIdTDfgzxYU1NDEAQRNEBeg/wm57qGhgbn4cOHCYIgggbIa5TrCIKgXEcQ
BBG8ua62tpYgCCJooFxHEERnzXXXrl1zHj16lCAIImiAvEa5jiAIynUEQRDBm+vq6uoIgiCC
Bsp1BEF01lzX2NjoPH78OEEQRNAAeY1yHUEQlOsIgiCCN9edOHGCIAgiaKBcRxAE5TqCIIjg
znWnTp0iCIIIGijXEQTRWXPd9evXnefPnycIgggaIK9RriMIgnIdQRBE8OY6+DfGCIIgggXK
dQRBUK4jCIII7lx38eJFgiCIoIFyHUEQnTXX3bhxw3np0iWCIIigAfIa5TqCICjXEQRBBG+u
q6+vJwiCCBoo1xEE0Zlz3eXLlwmCIIIGynUEQVCuIwiCCN5cd/PmTeeVK1cIgiCCBshrcq4r
LS11njt3Tv3GmOxDEEQwAPkM8hrkN5Hrli3LPbl9+3bn2bNn1TxIEAQR6EA+g7wG+Y1JZcmS
JQfLysrU+R5BEESgA/kM8hqjQoUKlU5UZnJSOWM5IRwrR0F6SPUG8x2jdLaHcvpzTLhfweX+
/fvZEL6MwmP9sD1R727cvgdPEHXDGCsfLp2XgOtOXgbxZTinF+6DU2NxHcp8eM+iuM67xuvL
/axCwWaTkjCbZfB+ZrAsVsCK1TUbK2J2lmvAblMfHl82Y8Z9YDKWO3F8WZraQhbLV4/OML9h
nWFuSFxgBovCuoXvPcuX/zxugXkiVJkUpe7fA7VZaiT0ZRL/D9RTYKPcBdR3jYpaTOXFCXyb
1cGxdWPgGLcNN1rDs+PLGq6FR9Qvvi8ETrdInEkTbUSp9WD9c75v31/CwrZwPaBO3D1R7OPZ
d5e969iy5Ba3HfQJ9r9ydxR7vqa6BM7JWaWa372Ux1fY3qxj+20K2b69bA9KiLhYKsVFT2l9
phTLYLQYPGbRrE/jRGNbmXPS00P5yfP4+j5OBNaLw1iOkOKOYftAOuaScswrUDayr93Hh0t1
FXe20C/gRim3GKI83RwDsd4GznXwRcxloP8DJmP6X4BzlKZk9ie2yYv+4bfpPE6jf1J0KDu2
+h52wnE/S+oVykb3DmNHSiexr7ZMZcfWTObHw9nbj1rZiJ4h7OOCsezkhvtZ3drJ7ED2CPaH
dy8xu/1bNjY2gh9LZnVrJrHqJYPZl8eOsE/2vMFsuQ3sve8OYgdzhrLXZ/VlF//2OTtdW8Me
W/o12zQ0lO0cH8lemtiFPT8sjO3d8xVb+L0v2d6qK+z8F5+x9IV/ZdPn1bIpMz9kk6buY0kp
b7HEe3/N+k94lUUn/5x1G7mTx8JYuSiKMiY+Pn4MLJHkuLi4ZFgio+XCt5N4/SRYIqN4/VGw
REbKhW+P4PVHwBIZOmzYsKF8ORyxDkpISBw8xFX4ttK3X7/+A+LjB/LzBvLN3tExMbF3xcX1
4XL6KEpU127du/fo2ctVlNCw8IhIpYviLmZLiOJRTB5b2ngIUzyvR3L+i3P70z4Wj9siLicr
rjiLlWJSvob101xr5WtaJmeTGkOutmpQJzhvY9autIITv08TxyI5s26PIbU8rvpmGc+Sa3hc
pLE5bC5bwJdhGAuwDMU8EI77InA9vAUdjcwhDupsy7ksTmpXtmMM2jGhDXY8wFmLbZ3EdmU7
imPRzdiRJ2M2m5Xya00Jv+as5Esb7282K2Qr+FaWeiUq5ltwdYtAm5qwbyZpOxT3hSLh0rqo
GyLtC2nnMZD9erg0HvJcTPhzH9xXX1+v2lXYaiQnkTNFY1fZjrOkOSDUH8xJwf3DcLzFcbvd
btLOM4RsOKaVzQzKViTZeu0mGuxTok6f9NpVsL0EH9sV9ROldoc0jb3X+XIRX75scfnzGKkf
YruH2zec0oW4PEVvXUzpYI4Fc6iXmStZ6F8XrarvqMnk9qu6+H9QlezsbIfNZnM+8cQTzuXL
l+sCx5trIzc31/Hkk0+qz6NWr159G4WFhS2ajct3wPvJtWvXOtetW+dBcXGxT2YvKChwPPXU
U87y8nLn008/7QZ08NUeXAcHnL9x40bnD37wAxWHw2Fo2HkfHHD+5s2bnVu2bHE+88wzht2G
6+2Ac+Fdxg9/+MNWud1zzz3n2LZtm/OFF15otdty2Y62nA+Fn+8IppiR79evNnO/7nl/15oS
pd7XAf/Ie8e/KG27d5ystO3eUb6OirlDqM51/fpvfuNxXU/Ba0eGj9fWFLwGZmqu62Y8Xt+9
u0l7D+ueU/BjWtnMoGxFkq3XbqLBPiXq9EmvXQXbS/CxXVE/UWpX77pu1lzXM7F+N9QLrudz
NPJ6SbaYJV2K5X6kq/cENeCGzfqDdp6XiTrn+TgmmSjT7sUftPM8czPzvExcGpGtSLK9zfOM
9ClRp0/e5nl5OHZ5PvpDHrZvb6U/ZKI/ZOv4Q6aOP8j9AH8Y3wp/sKPO630cEzvKdPjBH+y4
NCJbkWR78wcjfUrU6ZM3f1iPY7feR39Yj+07WukPdvSH1Tr+YNfxB7kf4A8T2GHD/uBAnXf4
OCYOlFnhB38QEyQjshVJtjd/MNKnRJ0+efOHHTh2O3z0hx3YfkUr/cGB/vCCjj84dPxB7ke6
eu9n3B8qUOfdPo5JBcqs9IM/VODSiGxFku3NH4z0KVGnT978YTeO3W4f/WE3tl/ZSn+oQH/4
pY4/VOj4g9wP8IdJrfCHStS5yscxqUSZ1X7wh0pxf2FAtiLJ9uYPRvqUqNMnb/5QhWNX5aM/
VGH71a30h0r0h7d0/KFSxx/kfqSr73WN+0M16vyBj2NSjTIP+8EfqnFpRLYiyfbmD0b6lKjT
J2/6ys+iffGHGmz/cCv9oRr94QMdf6jW8Qe5H+AP96A/CB8Qz/QnK/rvAEwGfceIPe5DmZvx
fUxbfceI7Od1ZPsyFu3R/+f/Af2XZSt+9HFoN1rTJ1/sKr5bMTfz3YpZeuci9BffrWxu5rsV
M8ZPZgv9Wao0yRYxpPXRdPVdTq3TovnG4moz31jQ8zL/Pi+T30uWl5c3m59gWNriyzE49iM1
8Sm9SvGIT4sXf7d4ySPa9rTxbvFjvtP2xRc95fe/rX1eadTmI1HPFC821z6vtDTzvNKojbSy
/dGu6NPz+I2eP9udgu2mGBhTX3PhSJ1cKNtHzoV63z/5KwZTUGZmB8Vgfd++3v2LH2ttXzbx
Cg9q+nIn6nkffme2yaCe8vcPUt4wxerkELOP6774Knwblqbx1QfQbyA2MtzP1o963Atp9fS3
32biWNuD4Nqh7Utb9HTq9Nttc36sLTbPQ33tAeK3C3T8NhP7kOe+h+9Yv7XjWDuCwG+1fblT
/XY96uu4A/w2xwe/XY76yH5rxz6sx3bGsmTOJPVbRgt+09iRfuzAsa8IAj/W9uVO9eMdqG9r
9PTXuFegrSqDYNy1fblTx3036lt5B+SvTT7krxdZ0/fZIn9VYB+gL4+r3xXb1N/FWNkj6i9i
cnk+6yLlMZHXIlC2wNKBOa4S/aM6CHxd25c71derUN/qf2COq0ZbHQ6Ccdf25U4d9xrU9/Ad
kONW+5Dj3sccJee4auwD9GUJZ7Q6S7uX3cPvMiazOqdFymthGrz1Re83OGadd0xCz/vwOZio
K+5/5HlnIj5rEufcz7eT1DbrpVr638Z7K/J4edMJvtEf+5eW9WjtN/rb6hgTbYDPiHXxjT4c
v70E5zf6VKhQodJSyc3NPQW/oaG/jUMQRDAA+QzympznbDbb8a1btzrPnDnjvHr1KkEQRMAD
+QzyGuQ3kesg/50+fdp54cIF56FDhwiCIAIeyGeQ1+S/SQ/zPciDNTU1BEEQQQPkNe2/q9bQ
0OA8fPgwQRBE0AB5jXIdQRCU6wiCIII319XW1hIEQQQNlOsIguisue7atWvOo0ePEgRBBA2Q
1yjXEQRBuY4gCCJ4c11dXR1BEETQQLmOIIjOmusaGxudx48fJwiCCBogr1GuIwiCch1BEETw
5roTJ04QBEEEDZTrCIKgXEcQBBHcue7UqVMEQRBBA+U6giA6a667fv268/z58wRBEEED5DXK
dQRBUK4jCIII3lwH/8YYQRBEsEC5jiAIynUEQRDBnesuXrxIEAQRNFCuIwiis+a6GzduOC9d
ukQQBBE0QF6jXEcQBOU6giCI4M119fX1BEEQQQPlOoIgOnOuu3z5MkEQRNBAuY4gCMp1BEEQ
wZvrbt686bxy5QpBEETQAHlNznWlpaXOc+fOqd8Yk30IgggGIJ9BXoP8JnLdsmW5J7dv3+48
e/asmgcJgiACHchnkNcgvzGpLFmy5GBZWZk63yMIggh0IJ9BXmNUqFCh0onKTE4qZywnhGPl
KEgPqd5gvmOUzvZQTn+OBfcruNy/fz8bwpdReKwftmfC43fj9j14gqgbxlj5cOm8BFx38jKI
L8M5vXAfnBqL61Dmw3sWxXXeNV5f7mcVCjablITZLIP3M4NlsQJWrK7ZWBGzs1wDdpv68Piy
GTPuA5Ox3Injy9LUFrJYvnp0hvkN6wxzQ+ICM1gU1kGns3z5z+MWmCdClUlR6v49UJulRkJf
JqHuCmyUu4D6rlFRi6m8OIFvszo4tm4MHOO24UZreHZ8WcO18Ij6xfeFKGg7wZk00UaUWg/W
P+f79v0lLGwL1wPqxN0TxT6efXfZu44tS25x20GfYP8rd0ex52uqS+CcnFWq+d1LeXyF7UN0
bL9NIdu3l+3BCCIulkpx0VNanynFMtSPkcZNXp/Gica2Muekp4fyk+fx9X2cCKwXh7EcIcUd
w/aBdMwl5ZhXoGxkX7uPD5fqKu5soV/AjVJuMUR5ujkGYr0NnOvgi5jLQP8HTMb0vwDnKE3J
7E9skxf9w2/TeZxG/6ToUHZs9T3shON+ltQrlI3uHcaOlE5iX22Zyo6tmcyPh7O3H7WyET1D
2McFY9nJDfezurWT2YHsEewP715idvu3bGxsBD+WzOrWTGLVSwazL48dYZ/seYPZchvYe98d
xA7mDGWvz+rLLv7tc3a6toY9tvRrtmloKNs5PpK9NLELe35YGNu75yu28Htfsr1VV9j5Lz5j
6Qv/yqbPq2VTZn7IJk3dx5JS3mKJ9/6a9Z/wKotO/jnrNnInj4WxclEUZUx8fPwYWCLJcXFx
ybBERsuFbyfx+kmwREbx+qNgiYyUC98eweuPgCUydNiwYUP5cjhiHZSQkDh4iKvwbaVvv379
B8THD+TnDeSbvaNjYmLviovrw+X0UZSort26d+/Rs5erKKFh4RGRShfFXcyWEMWjmDy2tPEQ
pnhej+T8F+f2p30sHrdFXE5WXHEWK8WkfA3rp7nWyte0TM4mNYZcbdWgTnDexqxdaQUnfp8m
jkVyZt0eQ2p5XPXNMp4l1/C4SGNz2Fy2gC/DMBZgGYp9Ccd9Ebge3oKORuYQB3W25VwWJ7Ur
2zEG7ZjQBjse4KzFtk5iu7IdxbHoZuzIkzGbzUr5taaEX3NW8qWN9zebFbIVfCtLvRIV8y24
ukWgTWHqYcZlqLQ04zIUbRwq7TehPcS+kHYeA9mvh0vjIc/FhD/3wX319fWqXcFWgzkjOYm8
vSkau8p2nIV9E/Xv4xVTcP8wHG8xl7Tb7SbtPEPIhmOZmnESY9SSbPAjrWy9dkHHKQb7NAXb
F+0OaRojr/NaUcesY2O4hsj6pKA+GT7qk4L9zPRiYzEll23si85CT2179X37eh0zONbaMYP7
hAc1fWmLnk6dfrttzo/JNs8waPMM1NeInnIsSznQJO+X/cSXdZD/Nt6jgbLbcH4j90Ec64W6
WrB+CvpxBs6l5vCct4LPMGG2buX5LZf/N5fnuxU83+VzbJjv4DrSBZdh0jw4DHWy4FLUM0uI
c7zZoqXYyMRxyvNxnDLRn+wdFBvtmc+0femo2MgzaPM81Nd+B8RGlOLy9QWccxybTmwswGup
HBuZ2AfoyxYvsaE/I7DyPa5aTbGzxue4CfNST44deb+2Lb24a0u82XHs1/s49nb0UUcQxJu2
Lx0Vb+sN2nw96uu4A+ItH+NnOT5reEon3pbjvFOONzv2AfqySL1e5fM4yuMR5LpH0fp/a/3Z
gbbd4aNtHegDFUHgz9q+dJQ/7zBo8x2ob2v09DbuFajDbh91qEBbVQbBuGv70lHjvtugzXej
vpV3QB47iXnpRc5eeE6rk8deRJlyHqvAPkBf1nEe5XMCmCcU8f/Z+FoJ/28OnxtMU2cMeepM
YZg6a5jF5+GPuOcJenMEvWt+uE5utKBN5friWU9r82YljmWVj2NZiT5XHQTxo+1LR8VPlUGb
V6G+1X7Mm9Wowwc+6lCNtjocBOOu7UtHjLtRPQfj8+LJBvVsr7xpxfut9zmN7Ha/EccSNXmz
GvsAffmxej9mZQvVeyfIliX8Dmql+hR2Fc+VyXw5k+fNEjaJPazm1alsPpc+nk3n88USzgR+
7zVGfd8o8mdXzf2QNq+KfSGa4xGauhE6OVWcH6mTo+XnId5sLo+LvN4Nn1OLd1fRqrwk/t+5
RTn2gqyiNdbCAtvosqw11rQ5cxekWQtzrdPsy8Y9ZF1WVFhWkmctyiqxca36c7vO5wrMsjT5
lmJyLWV/64hvERS8RxBF5BZRdscw9seefPynzp6m1u5hYtFm1/Nxj/fNfEdf3p9UXqVeK+S0
hZW/ZnY/ZxXvScU7jx7SM3G4T75P3QMGiOISb3DAGm+rYySe48ulN+d+d2Q/oI5IJMZzXyl2
vZUH8QuJl1WNxNcSU1COwvU5525T2Mwk+ZJ4ZxAm9SlF/ULDhKgvNS3R7pG1qG8O4BzVUfRq
c+9SPGrDW5LZpfkl9pX5Nmt24YqVWUX24sKCYulkdwl3bcPJJvVktUn9imZfK1p8rRjia8VQ
XyuG+Vox3NeKEbdXnMYe4ZqbuO+t7UofKVGhEizF6efymPtiY8YLgiJtNSgNioUnHHXfvgnf
Xpp+py5FUnzM84ZA6kvTBU/xcqxBcWGRLl6vqZdLiw9TD1F8O8Nk+Ayz4TNIK9KKtCKtSCvS
irQirUgr0qqzaHVv6hflJvXh3ONsUw+T+rBP1kH7IWtnfkgpb4sHyfCAUv44OkZ6GB/JPD8K
Fh9aa20rv/iRXxzAw/mcZmwgzh/k0bPyFP11/SLL0/vhl9gndBf3w/fhD9PESxbhM/Cxstwu
7Nfrx0iprfv5dpIf++FN1yLO2L+0rAffo7SkhwgD8NGJ6oNk7mt1jIk24KWPWFeYVfUHOK7z
pEL8nwoVKlQ6VcnNzT0Ff+iL/kAGQRDBAOQzyGtynrPZbMe3bt3qPHPmjPPq1asEQRABD+Qz
yGuQ30Sug/x3+vRp54ULF5yHDh0iCIIIeCCfQV6T/zA1zPcgD9bU1BAEQQQNkNe0/7hSQ0OD
8/DhwwRBEEED5DXKdQRBUK4jCIII3lxXW1tLEAQRNFCuIwiis+a6a9euOY8ePUoQBBE0QF6j
XEcQBOU6giCI4M11dXV1BEEQQQPlOoIgOmuua2xsdB4/fpwgCCJogLxGuY4gCMp1BEEQwZvr
Tpw4QRAEETRQriMIgnIdQRBEcOe6U6dOEQRBBA2U6wiC6Ky57vr1687z588TBEEEDZDXKNcR
BEG5jiAIInhzHfwbYwRBEMEC5TqCICjXEQRBBHeuu3jxIkEQRNBAuY4giM6a627cuOG8dOkS
QRBE0AB5jXIdQRCU6wiCIII319XX1xMEQQQNlOsIgujMue7y5csEQRBBA+U6giAo1xEEQQRv
rrt586bzypUrBEEQQQPkNTnXlZaWOs+dO6d+Y0z2IQgiGIB8BnkN8pvIdcuW5Z7cvn278+zZ
s2oeJAiCCHQgn0Feg/zGpLJkyZKDZWVl6nyPIAgi0IF8BnmNUaFChUonKjM5qZyxnBCOlaMg
PaR6g/mOUTrbQzn9OSbcr+By//79bAhfRuGxftieqHc3bt+DJ4i6YYyVD5fOS8B1Jy+D+DKc
0wv3wamxuA5lPrxnUVznXeP15X5WoWCzSUmYzTJ4PzNYFitgxeqajRUxO8s1YLepD48vmzHj
PjAZy504vixNbSGL5atHZ5jfsM4wNyQuMINFYd3C957ly38et8A8EapMilL374HaLDUS+jKJ
/wfqKbBR7gLqu0ZFLaby4gS+zerg2LoxcIzbhhut4dnxZQ3XwiPqF98XAqdbJM6kiTai1Hqw
/jnft+8vYWFbuB5QJ+6eKPbx7LvL3nVsWXKL2w76BPtfuTuKPV9TXQLn5KxSze9eyuMrbG/W
sf02hWzfXrYHJURcLJXioqe0PlOKZTBaDB6zaNancaKxrcw56emh/OR5fH0fJwLrxWEsR0hx
x7B9IB1zSTnmFSgb2dfu48Oluoo7W+gXcKOUWwxRnm6OgVhvA+c6+CLmMtD/AZMx/S/AOUpT
MvsT2+RF//DbdB6n0T8pOpQdW30PO+G4nyX1CmWje4exI6WT2FdbprJjaybz4+Hs7UetbETP
EPZxwVh2csP9rG7tZHYgewT7w7uXmN3+LRsbG8GPJbO6NZNY9ZLB7MtjR9gne95gttwG9t53
B7GDOf+PvW8BbKO4Fp3VX7L8j5OQr4gD+ZA4kizZcgjYCfmTQEjMr6TUTiwTgWMHW86HJEZA
gUChTUlpuf3d3LaU9N5+aF+htE2KS2nL7S0F0pjybVPKa3P5lJTfaynFb2b2jHZ2tbta2XKI
lZnkWDu7szNnZs45Mztz5pwz0XdWTUCv/+koeunIU+hjG/6K9pzpQp8L+9DnI0Xothlu9MMH
/oIu/eif0Q8Pvole/eMf0JpLf4+WXXQEnXv+/6Dokn40p/EHqLrhW2hS7b1oTM2XUMnsz2Fe
CPJBkqR5U6ZMmUd+AWrGjx9fQ34B5vIBx+fg9HPIL8BZOP1Z5BdgNh9wfBZOP4v8Apw5Y8aM
M/HvTIDA6dOmVU8/Qw44Lk2YOHHS5ClTpuL3puJo5ZiqqrHjxo8/DZdzmiT5i0tKS8vKK+Qg
udwer08qktLB7nBKqmBTxbT84JbU4xEv/8an6akfTYE448uYJPPZWI4n+TFsomas5ce0Zgx7
KA/JeT0FOJH3bmm9Z2Hn8w8uZM98GFZl8hANLZQ2t2EpuQPzxUJ0AboQXYJ/3cAL5NcFcsAD
97xw7cmCYy5ziMd04rwsG8/ly7djFbTjtGG046MYdkJeL0C+fDuyZ2NM2hELY7Qa9eKxJonH
nC34N47ruxF1oc041kpHoh4cI6ObF9rUBnWzcXEX3HMBeLhrltbJ3XOOcB/wdD2T6w9+Lsbo
+TS4d/z4cdqurK1mY6jGcK6mXfl2XMXNAUn66Rga4f4M6G/2PJFI2LTzDFY2eaYtG+VYtsSV
rZdvdY51qtapk16+EuQ3zWK+LH01l+8ZSt8bzpe78e9+h0zP87h6sHhZmjYGuYE41ah3zaZ0
ZI5F5lD7kSws9MfFAKUdKkwyR3X2v6DCxo0b++Lx+ODVV189eM011+gCeW6WR3t7e9+1115L
16O2b9+eAV1dXVmbDZffR/Ynd+7cObhr1y4V9PT0WGr2zs7Ovuuuu24wlUoN3nDDDWkgOFht
D4xDH3n/lltuGbz11lsp9PX15dTtuA595P1PfOITg3fcccfgTTfdlDPZYLz7yLtkL+P2228f
EtndfPPNfXv37h288847h0y2uOy+4bxPAn6/r5B4hv9ef8vke139fTeU4KffdQQ+zG/HZ6Xh
fTvGpOF9O/LjKJs7uHTG9fe+/W3VuN4IY8c6i2NrI4yBzZpx3Q7Pj5eW2rTfsOk5BX6mLRvl
WLbEla2Xb3WOdarWqZNevhLkN81ivix9NZev3rhu14zrzZC+BPAi4/kFmvIquLZYxQ3FfD3W
0G+CpwgZmtKDdp7XDDhvstgnzVBmwoAetPM8u8k8rxl+cylb4so2muflUqdqnToZzfM2Qd9t
skgPmyD/xBDpoRnoYaMOPTTr0ANfD0IP4SHQQwJw3m2xTxJQZl8e6CEBv7mULXFlG9FDLnWq
1qmTET3shr7bbZEedkP+fUOkhwTQw3Ydekjo0ANfD0IPtehwzvTQBzjfZbFP+qDMfXmgBzZB
yqVsiSvbiB5yqVO1Tp2M6OEu6Lu7LNLDXZD/viHSQx/Qw5069NCnQw98PdbQb7/c6WEf4Hyf
xT7ZB2UeyAM97IPfXMqWuLKN6CGXOlXr1MmIHu6DvrvPIj3cB/kfGCI97AN6+IoOPezToQe+
HoQeokOghwOA80GLfXIAyjyUB3o4wL4vcihb4so2oodc6lStUycjejgIfXfQIj0chPwPDZEe
DgA9/ECHHg7o0ANfjzV0Xzd3ejgEOP/SYp8cgjIP54EeDsFvLmVLXNlG9JBLnap16mSEL78W
bYUenoL8Dw+RHg4BPfxShx4O6dADXw9CD/VAD4wG2Jp+TNLfA7DlSDu5tMd8KPMTsB8zXNrJ
pezbdMq20hcjUf/bPoT682VLeaRxku8YTZ2stCvTW7Gb6K3YuT0Xhj/TW/mEid6KHfinOUt9
NkhK2YyHtDS6hu7lHBl0aHQs3jLRsRDrZfldL+P3JVOplKl8It0yHFqugr6freFPbitFxZ8O
A3p3GMgRbX5afnfkUd5p62IFT37/d6jrlbm2+WzAs9GgzbXrlQ6T9cpc20hbdj7yZXW6DXT0
8pnvuZBvYw59alUWztaRhXz78LJQT/8pXzzYCGU2nyAePD5hgjF94WdDrcsenOAcTV1ORjzn
g57Znhzx5PUfOLlhG6sjQ+wWr63QKtENW6ih1QVAN4Q31qXX1p9WfQtp8cw33TZDXycKYOzQ
1mU4eA7q1Dvd5vjZcNp8E+CbGCV0e4kO3TZDHTalv+FPLN0moK/7CoButXU5Wel2N+DbdxLQ
bZsFur0G8OHpNgF12A35BFENhijVZXSATuOJpOM+6Pt9BUDH2rqcrHR8F+A7FDzz1e/7oK0O
FEC/a+tysvb7fYDvgZNAfu2xIL/uRop+NpNf+6AOpC4tVK84Ts/FBNBieiKmHcuzIk6OMbnm
hbIZOE6gjDsA9HGoAGhdW5eTldYPAr6HPkQZdwja6nAB9Lu2Lidrvz8F+B4+CWTcdgsy7mGQ
UbyMOwR1IHVZj2EunaU1oHr8lRFDzww6OLnm1oBRXfTO4Nh19pgYnvNhHYylZd8//LyzGtaa
2Dtn4/gcmudxLpW+brxR4PvLCCeiox98NjseQ9XR3/sMQiwPQjPsmunok+eZoTB19EUQQQQR
soX29vYXyRkaYRtHgAABhQBEnhG5xsu5eDz+3Kc+9anBl19+efCtt94SIECAgFEPRJ4RuUbk
G5N1RP699NJLg6+99trgE088IUCAAAGjHog8I3KNt0lP5ntEDj711FMCBAgQUDBA5JrWr9rb
b789ePjwYQECBAgoGCByTcg6AQIECFknQIAAAYUr644cOSJAgAABBQNC1gkQIOBUlXXvvPPO
4NNPPy1AgAABBQNErglZJ0CAACHrBAgQIKBwZd0zzzwjQIAAAQUDQtYJECDgVJV177777uBz
zz0nQIAAAQUDRK4JWSdAgAAh6wQIECCgcGXd888/L0CAAAEFA0LWCRAgQMg6AQIECChsWffi
iy8KECBAQMGAkHUCBAg4VWXde++9N/jqq68KECBAQMEAkWtC1gkQIEDIOgECBAgoXFlHfIwJ
ECBAQKGAkHUCBAgQsk6AAAECClvWvf766wIECBBQMCBknQABAk5VWffPf/5z8I033hAgQICA
ggEi14SsEyBAgJB1AgQIEFC4su748eMCBAgQUDAgZJ0AAQJOZVn3t7/9TYAAAQIKBoSsEyBA
gJB1AgQIEFC4su79998ffPPNNwUIECCgYIDINV7W9fb2Dr7yyitUx1i0jwABAgoBiDwjco3I
Nybrrrqq/YVPf/rTg8eOHaNyUIAAAQJGOxB5RuQakW+IC+vXr39s27ZtdL4nQIAAAaMdiDwj
cg2JIIIIIpxC4XwMTRiCGJwYAhgkgDIu3XR84yyd+JkYJmFwwH0Jfn/2s5+hM/CvH55NhPxs
8LwO4vXwAkvrRig1k3tvGlwP4nA6/vVgqIB75NWxcE3CWrLPIsnvvYPT8/U8CAXbbdK01Wgd
ruc61Io6UQ+9iqNulEDtObTbkvPC25Yvn0+aDLVHwtsW0hxaUQd9utx+f2C5/e3qS+ykRck1
wekY/v1i6BJ7hCSJ+un9B0hq1OQjdYkC7hKJpGQg6eVeocGW6pmG4+gZ8mzXPPIMtw1utLc/
Ht729jse7/HL5zslaDsGLy9kefhpOnJ9FN/rf9btvgPjQdKMr/ejx1fXbftx3x3rP8BtR+pE
7n+tzo9ue+pQkrzTtpU2f/qX71/W9k6dtt8ribYfqbYnjcD4YgPHF+Xc9fkcL5P0VVy/8ddL
MYyBvJovWLPGhV++CF/3Y/BCuvHAy16O7xDkT2ANyJIUyBUSbkF/TT+fyaWV0tJCPxAyavwA
AUg3mMFUSHc9hvcILYIsI/gvsOWG/2vkHUkRZr9Aewzw92TgHNLgP2eMC/1uez16vu9sNKfC
heZWutFve6PoL3csQb/bEcPPPeihiwNoVrkTPd4ZRC9cfzZ6ZmcMPbpxFvrpj99AicQ/UHCs
Fz+rQc/siKJD66ejP//ut+g3D9yP4u1vo5985HT0WNuZ6DurJqDX/3QUvXTkKfSxDX9Fe850
oc+FfejzkSJ02ww3+uEDf0GXfvTP6IcH30Sv/vEPaM2lv0fLLjqCzj3/f1B0ST+a0/gDVN3w
LTSp9l40puZLqGT25zAvBPkgSdK8KVOmzCO/ADXjx4+vIb8Ac/mA43Nw+jnkF+AsnP4s8gsw
mw84Pgunn0V+Ac6cMWPGmfh3JkDg9GnTqqefIQcclyZMnDhp8pQpU/F7U3G0ckxV1dhx48ef
hss5TZL8xSWlpWXlFXKQXG6P1ycVSelgdzglVbCpYlp+cEvq8YiXf+PT9NSPpkCc8WVMkvls
LMeT/Bg2UTPW8mNaM4Y9lIfkvJ4CnMh7t7Tes7Dz+QcXsmc+DKsyeYiGFkqb27CU3IH5YiG6
AF2ILsG/buAF8uuCunjgnheuPVlwzGUO8ZhOnJdl47l8+XasgnacNox2fBTDTsjrBciXb0f2
bIxJO2JhjFajXjzWJPGYswX/xnF9N6IutBnHWulI1INjZHTzQpuSqYcdfl3crx1+XdDGLu6+
DdqD3XOOcB/wdD2T6w9+Lsbo+TS4d/z4cdqupK2mY5iNoRrnd66mXfl2XAV1Y+nn44SNcH8G
9DebSyYSCZt2nsHKJs+aNf3E+ihb2YSOtGXr5UtwPDfHOp0L+bN8z1D6yHBey9LYddqYjCE8
Po2AzzqL+DRCPZsN2phNyfk2toIzw1Ob3/EJEwz7jDwbap+R74RzNHUZDp6DOvVOtzl+xrf5
uhzbfB3gmwuePC9zMtDG3+fpxMo1Kf8h+EYjyO6F+Q1fB/asAnB1QPpGoON1MJe6AMu8zXiG
SWbrASzf2vHfdizvNmN514EhDvKOjCNF8Ovm5sFuwMkBvyydnQP2jlFbZOONZuinTRb7qRno
KXGCeGMk5Zm2LieKNzbl2OabAN/EScAbfkmm9UswvIIhrsMbl8BYyvNGM9SB1OUOA97QnxEE
8B05lcI7OyzzjdsgHc87/H1tXnp8Nxx+S0Df77bY9wmg0b4C4DdtXU4Uv+3Osc13A759JwG/
dQD/XANrDdfp8Ns1MO/k+S0BdSB1uYyOVx2YjzZhDpK/UbT0P1R67oO2vcti2/YBDewrAHrW
1uVE0fNdObb5XYDvUPA06vd9gMN9FnHYB211oAD6XVuXE9Xv9+XY5vcBvgdOAjn2AsiluzH8
kKzT6sixu6FMXo7tgzqQuuzCcDGeE5B5Qjf+F8dXSfy3Dc8NltIZwyY6U5hBZw2r8Dx8cXqe
oDdH0BvzPTqy0QFtyqdnaz1DlZsHoC8PWuzLA0BzhwqAf7R1OVH8czDHNj8I+B7Ko9w8BDj8
0iIOh6CtDhdAv2vrciL6PVc8p8N6cSxHPEdKbgbge+thDO+iTLphz6o1cvMQ1IHU5TP0eyyA
LqXfTkRaJvEX1Ba6CrsVy8oa/Hs+lptJFEXnUbm6BK3FpYfRMjxfTGKoxd9e8+h+I5OfxZrv
Ia1cZfecmudeTVqvjkxl7/t0ZDS/HmLU5ny/8NclsE7N9q7G0PLm4L8XdrclOlu7dwS6OuNz
t7XuCCy84MJLFga62gNLE1eFFgWu6u7altwU6G5NxjFWk3C7rsUIrHIotEWIZ5Dbwx3U7OeO
VJDgG4EFJltYuK8KoZ+X4/5fsnopTV1mQ2Ps8vq4ar8Z35iA69OEkxzXFvKSA6W+YU+vs7J9
UrbnUcatiZPv5Pn0TiXmQz8u8Z8YSGs8RPuIrePzoRLD2TQ3CXYTFtBe8QFPT+D41yicg6mV
UMZGrv3buOs4d83vm++nO0U2oKqNmt7TltJmsMPBQjzL8/Ysz8+FtpFwG76SbgPWzzaO/tk+
h5vrh0aqVWIDoBuxjjHpchx0t4O8Q4lbLzXmCEmVmvTF6t6OZGJLRzywsWvzltbuRE9XZw/3
cjp45Dh52UZfplnqJ7RbTeiwmtBpNaHLakK31YQeqwm9mQmXosUYcxvml53FQrFKBBEKJQzm
OXwsPfW1w4AgcbG3pbclBxY49F5/7T/eWHay/jKh+DH1RwxXF2XAkwyevS3J4OAGr39L5/b1
tLIHCVMBHHRBpJcTy2QK8wFM3Zfmu/t/fXORe0ngaqrO9cEgGqsULWmKXhPY2trRG89f0eM/
+dLYSx/dtUAuWuKKtnFFjyOTRTLDTXYlWztUg/uwEWC1HqcUbdcruidxVWeiPbGxtTOZVwRw
rbmiHVzRRD3m0kRHWyC5Y0s8sLWnJnB+dzJ6Xnd8ydrm8LLWZGtt+7z2IZQYeHPhGw9Draco
RTtNi16zARecLnSoRa95buI7ULTEFe3KVutYHmodKX8airZxRbs1Res0sU79cww3vzoARdu5
oj0Wix5O/csua3i5US7awRXt1RStqp1hobkVvXfCvDegaCdXtI8reoIlCs+x6M/MfeLNjQ8F
GV9PUIouMi1aj8JzLLro9D2bzr27DoqWuKL92WodG2at9/h+9d0ffWEcFG3jii7WFG2NwnMo
+sXH//R0oocVbeeKLrFY9JAp/OWLf3jHK185A4p2cEWXaorOO4Unvlx18MJvMzJzckWXcUWf
PhIUfnPgu/+19zrXOUDhpytFl5sWnQcK/9Ivvntwz68SbLzmiq7IVuvhUvhpf/r5xUeCh88F
CueKrtQUnXcKX7vr3B/d6T8CRdu5osdYLHrIFH7T60Xnn7f1BehrB1d0labovFP45uWHOy79
jhuKdnJFj+WKJkqri7q7tnXOXdrV3bMjuSkeWIqGW7T8GfHG9UDhE5Wix5kXvSbPRUtc0eO1
Rbd2JzviySSub36KvsP98UW///JZTIZzRZ9mVPSaPBX90//98dF7bVfDeG3nip6gKXptoOfa
3tbuOMpX0Xc+kPoaOvxXNkvhip7IFT2Z7DcE1nR3bWjdkOhIJHeQOXlnb0dHYDkaziyFm4ej
yUrRk7IV3dqRjHd3tiYTW+MYg6EWfTmbKnBFT9YUvRYX0kWK3JLGIBHvQcMtmtXaxhU9RVP0
4kR7e7w73rkxHkh0BhauOG8jGl7RT0h31X7DdzGbKkz+Bl031n5as6L5z2sWrL1hy/kNe85v
CKwEVgIrgZXASmAlsBJYCawEVqcKVn9s8qTkHLx08Z5oHi3U0TbiP6r18snbh8Qo2WgtQkFo
eB8HpEV6AYg9g4sxtMK1gJMLpsOe0UU6vUs2dGYCOwb+w819ZA8OzsA3t2Ous3H3Hsf3aiRb
xjYy0w9q2mKjtPFJekKNsNQMjnt9mrf8dIGKBYYvzed6sgswXrNh3dStpJCfShyQpxcDnsVp
bTgb97QVnpamFmikB+P2OFJ0iMhrfq5+fPDK8quMU7b7FC2SVyCToOHp1hI0413pYh+kB4fc
OnvyDHj0mTIob8yFIcbKYgfzyXVpk1xJp0klWV4+w0oS8ljT2tPTelXcQl0R1IfVleGAsuDg
McXBx6/MW8TCm8bClsZCGhYWJdrlaouYFOtgYhsWJsUMk7XhumW1y2otIuJXIXIbIKGodXhg
fJRwEURL+oKuzo5EZ6A9kWR6ugvnN7du6IiTaHe8p7cj2QPD5zG7DHoL09nqY0bDhSB81cMn
21MljfUkwG1kUoHko/B7xXBVEMMn2ej6Jv4blcamuZ3c+4ZUhRrooQW1pOdHAWX4dNNclOHT
r9rvGRy0Onwy1e+m65X3leHTa/jUxvEt/1SWYm4dTm6H7S7t8MnSjgVID58lErtNLn5KEz2z
glxvxnC/tIVeRwkCzqPLyXUNUYxx9dNrgsYWO6JpbsTwd2kvvV5J8nYG0u+2FCnvNvnld0nD
Ntn702lQmZLmaJmS/5MeJf8Djr1p3Lb4ZNzuJXg6H6LXROnuSf8aek209Z90HaXX5xEcSstW
aJuLsP3f3an0u8fL1qwop2dSiFhdsn1LV2e8M5lo7WAnJOLX9pKtlc5F8Z7kXCKaqW5bT4CE
y4P05xr6t7m1l/4u7urdgMX4VYHmxOb4umRbTWBJd3dXt+qFhugZgfO6OtsTbXTbZEVnMt6N
87Wa67KurrbOeE+PPEwk5QTxq7rjcfkWvmjr2kxvs404Glm4oaerozcZD6zr3UwSrqOP5FLX
7ajZfkHv5g3xbrqL1JXoTMoPFna2duy4Lt42IFrJQispswE3N72YJGmnpOuBB8n+5URUimbj
9CE8DNdj0dGIKrBY8aEr8L0N+N4mnGcKX9+Kr+/Ez+/Gz+/D7zyIGf9xLHSeQ5PQu1SokJNi
ZahUKsbPENgbY2EiUuxjlYLAmI2UM0ghpNj+qgcRRqYIjaC24QJhx84wXYGUsxob4DnBYRNs
gpN0KaTYmrgVKSp8d8J7ZGJ1N+RPpnv3AW6ldLIuCzaiKPM4pCWaK8/Bxit5510ocwytuZyW
1LlUktOz6R+z0OfUCE6vRslOX3Bqp8OKBE1rsekI5hp6JUs1Ko1Q2Yq0tJP605Jvv61/ud67
LXYlTcCRmYZIxxhIX2Kz7DFpD70mk5s1tnvS18fwtfZd0h8ollrGJG6ZG6VxC5Qq5R4tVZer
l09qUWpZObodydbpgjXhuoa6ucGaYDAWiYXmhkL1NQ1zY6Ga+tpgTShU20D+NoRIgnBtbSSQ
7AoEa6J1YfJKbShSL98IN9TXz01gzu8kG+n41tzamlB9TH0rXBMO1kZJSaFIXQjnW1tP/tZF
6+oH6CnrT500+KSpR1883KL6fuLFg0JYLvzPixnDhQncBQztQqfD9QzMDg2YPVaiSvRRqupE
DDZJ6FpM2jtwmuu5D5ab8f0HqUmoUu7LiDdFx44wliLF7FwVUo5nTUSKubrT4doHCw8VQBYN
nKLZSlC/Iiz5UbguRbJJKWaa7lqkHMXbAXmSvK6H6yqKufpL22vA1iWW2Frv+zKTtf8zC2uT
6364JvVPSfvT1wHb/gy2JROffps88SHX++1Hl+tNUgKSPEkh1/vhmtStydGSvg44W/RZOyiz
NmVnmHyRso76lQlXf3F21kbzCWvvgEVHzAbRYAyzRRDzTU1tOBTGl2FM79FwXRD/RELhMOGm
aJ3MNLUxygUN0ZAcjwTr8SuRKOWpaE0oHMVcGKwlsdqaaBRnXtMQCWGGDMZqa8mb4YYQ5uRb
QNZ9KMWr6EOfeXtVSw488/6ninldmBSdmLydQIZuNBmIcjomvAiGxZgk11KyJKOFhFrxO1fh
NJ0c8yazMi8bw/3cZ345Us4tj+XG7clIOZc8HRiRdHwEKQqqi4GhSB3XwnUpxVBh3lYol5Rz
FeRJmLeTY96khnl9Bsxbbol5dZZkMnn3niy8S3kRKTyxnxuWWwyG5QA3LB+16w/LM7lh+SFu
WG6CYZlI9Wds+3V5N1Wv8C4q4WQMd52yMCyjhYR3yaTrJpl5InSUwzxSPzdSE60NkyEsQum8
Nkzu19FRsq4+GmaDYDSG78SCtbXAUHWhBvWIF8K5RtW38At14YYoGXZp5qEQ5s1QpCGoHpM/
bGR40tFn65tUC3g8W9+jYms3JkUXHtFkFj0N/06F6zMwC9Rjcl6On14Bx/S7cP9swc+3YtjF
sfWNWdmamQ0o5sbkSu7ZadyYPJUbk8/gxuR6bkxezo3JV8AUupRiqLD1Fo6tt3Jj8i6OrW9M
s7XxAqcNM+wEgwXO83q7t8azrWqe5HUfGe5Vf1yqVzWLuE3BXwDwm4JdYhVx1K1q/sWeuarJ
wm4dI/n8PYlbyycSrH8rvymoNd3hG+KqJhuOm3r0VjWLDZ+yUz7ap/JEwMXtILF113bAku27
FXH1M9svm5LOQc+pgOc3j549kDacCW8p4p+g5MqysebXzFoYsgzBmdwCriuHjbUB2nxe/rkx
Yl4dxIoNECu1hJj5XtsAlYLF2jTGCBbrIFhigGCFJQRNt+AG0pNV/XFdi55fhZ7euPXTlHzE
d/jjVraqFbrUy02ZRYxbo3vc4kea6bR/Jd172nGrjI03PXrjFhunhjpulZuOWxWm41al4bhV
phFodhBofk5nxIcynS+Y63lkGZ/KsoxP5QZIFeuIorJ8jk9lWcanCgPEyiwhlofxqSzL+FRp
gGClJQSHPT6V5TA+/RS+qxy4YHqos7vr6vjGZAB//HYFQoGORA8dqDZ2dfYkWzsNlUa+ZjJM
lZ3SwxSvNLKCAzEcnLzAJOKKHJRGUHoaIpneY8NUej/1etkwkf7nlV9T+l9o+ZsATzmWUMWu
VsWuUcU6VLHNqlinKtalim1Rxa5VxbpVsR5VLKmK9apiW1WxbarYdlVshyp2nSq2UxXbpYrt
VsX6VLHrVbGUKnaDKnajKnaTKvZxVexmVewWVexWVWyPKnabKna7KvYJVewOVexOVeyTqtin
VLG9qtinVbG7VLF9qthnVLG7VbHPqmKfU8XuUcX+TRX7vCr2BVXsi6rYl1SxL6ti/66K7VfF
/kMV+4oq9lVV7Guq2L2q2NdVsftUsQOq2DdUsf9Uxf5LFfumKvYtVezbqth3VLH7VbHvqmLf
U8X+jyr2fVXsAVXsQVXsB6rYQ6rYD1WxH6liP1bFDqpih1Sxn6hiD6ti/arYT1WxR1Sxn6li
j6piP1fFfqGK/VIVe0wV+29V7Feq2P+oYr9WxR5XxX6jij2hij2pij2lih1WxX6rih1RxQZU
sadVsd+pYs+oYs+qYs+pYs+rYi+oYi+qYr9Xxf6gih1Vxf6oir2kiv1JFXtZFfu/qtifVbG/
qGLHVLH/VcVeUcVeVcVeU8VeV8X+qoq9oYodV8X+poq9qYq9pYq9rYq9o4q9q4r9P1Xs76rY
P1Sx91Sxf6pi76ti/1LFPlDFBiGm/uxlc9PMz96xnCLpSrgnf+tUcR8bzDYufw7DwX3GVmV8
65DPu/Pg28JAFZ5kxApZBBMwvfMYqzQrYmy1shQ+0piVDeasaAa3E1bDbXLPhzLYx9zYLBX0
mFaQYHQJNWGYvXY+wECvdmWadWhfln2yIlx2BTsol8VEt+o0g4VaaVuq8D/gAtBbnwZ4S8BJ
DWyd8S0LH3D8ftd3JRey2fTv8Rr+5NlqXa3/1fBhxXIIcCnsWQ/N+dMridqnLemnNp2nW6iw
DsKTCJTVtJV7n7vespU/iBfktMnYW+wgnvlbBJM67q3WLG/J8nS1RuIUmRzcW53Lwb3VnMpF
qcnBPa0oLeWEfcQEOXYYKsCVl/thNx5Lo8Nu0WFhYfWwmxYTvcNudcPCxOJhNy0iVg+7leIi
iGMDcwcVqtFvvmze3/rJN6PKFboENV7EvFeSYScng3aKRcOCOPmGYF78Fc0ipvYeG93O5dI4
02MguXuDlLmImeteW5PpybeFpiffFhk+tcMhCv2nDlBT1T81x9fXDUMH2dg5X+fUHEs7GSA9
dm2Q2G2mp4pQpvL1x+h3tXwajSil9bua0uc/jkplaaXQGCiFPiuRddpbVrITdPe7Axl5kpXG
mY570krfKW+LcsLNp+S53SnnuY+eXW9bqc2HTHD2lson6N6kZ0o8K1k++yuUfO7xKvmUOTPz
Id3+5LggTfMEPd13bAU7STiz+BnldF8sU7GdHL/fMqmJpiHrCKvciOJA1qfuKX1yRTkqxz1S
jEE+98xOVcljQ0/v5s1kxAgsDQTAxrxykX64sDseaEubJOwJtG7u6rwqsDne2tkTwJ+syURP
MrGxtaNjB2+svTEwc01gQYBok89SjoNpzIYm4z1JUvjMxUs75wQWL22bZYbHOiV3XBbDKElw
6Gxr7W4LtMW3JuihuR6+dGa0c0YPlMfdSKMfmLmxq7s7vjEZHxEc5OZO0i4INHfHW5ObyVsz
N8ST2+LxzsDGro7ezZ09pKXiPYm23taOwMxtieSmBP+omVjhX4xnMwo6ysm5JMu0h1SFvaI8
h+ODM6kp/1kDgiwEWWSShTIZPZebjBbbtF8R20FyMx20EjxcTcTvTcHifQYqRzEsA3eCUuTN
qBLdg1N8HT/7Dn7WTw8ykfW8UuSRpqHZkhfVSuVosSTf3y0VoT3SZDy5moj6JXlQ/qXkR7+V
AugtaQL+ciF+xPihs4RTiGQ+5yYixYLEFPi+cMIQXg6ftDGQ1W6Q0z5IdzPoKPhgD6cElsu+
jhQL/t+BfIph3b4BhsF/wC/5uvJIsv8/km62JL9LFqNqJfkeKWOxJL9bRWsul0OW2vZIcguP
g6nmRDgD2i/J+E6grSLjQp79VpIn6WRp7y1Jfs6+Xpo4hW9+uF6qcy7E4nC9kybas8JM65qd
12JHIlsk+UgkQbPfnlrOhvSUp0k5L+Iw1uTOV2C4tTj3p8tFcBifdE+qGKVxQyVNGUNuBdU+
RwrObu6Mi0c5txbw7s+ulT5D1m6neVai5eV0zeEivRXLcKgmGqJyIxgMzcbh8nhPsKY+GA2S
c1u15H44RO+uWxesaaiLBMkJrdpIqKa2rr42HBoYuaz1xcZFyFhslKdbghzfGotJcAomz2k4
jzMy9Dkzw1n4nSBOV4dzjoFhs7Px9Tn43nkYVnAWWi7AbX0hfvYg3SbjlXDKAWd2lMsBrMeO
aU+BewSfadx5ljPgXhnFRDkOFuTONNRxum4xeLeKYqlYcj8H0o8DMeQCFl8BeU6k2Mu0Qtj6
QniXsfVCA7ZeZsLWpwGk2TossduncpAUdbrladaUONaE++S6SSJsylQKFy8Nh2Lh4ID2hj5L
ZBrS2jSirW+j7r7s+K+TskAEyKWK0xgfy6n3jwOcmdl9p4bkFhmQ3HITkhsPkCa5MyV2W5Cc
QnLUrAt3ihJJRzGZsXPdq7HcjWCyIofqwxEsyw0e6JNd5jJw24j2ACE7FyYGNya5mZz005Ic
k34eRk5AZucZkNkKEzIbB5AmswkSu32qk9ll8jJSej2iBU/cyqmaKxmM+c8sfB2eEwjFZgXO
CdBJwYC1ZPpkNzmD7FpGtEf8+F85JjnmV7WKW3hjrlPKOTJbbEBmKwWZDYXM5O0a+ez3Sqou
GcBkVgWNDp/M8OmL55kDxo/0yan8BJOTG//z6ZATf+Q/m/5BGSaUhTnuzeg6U85+LCoflR29
hCaZbNW8y+kZXQa/N4qtkYLaqtmus1WzXWerplGTp7xV0wgaiMPdqlliulWz1HSrZpnpVs1y
062aFYZPncAj+k9dsGmj/5S08irDTaBGzSZQGYyezTqbQCxtGUB69PxF+jaz9IHle3ozA1d6
JVtNaXJlWv4hisQPSf0ZGzxkE2W77VjahGGL/Wg6z4ANrcw2WUr5mnTz3O9U8tzjUvL8vh2t
LEflxEQaBmVxtb11c6IjEe9R7nAiPbAF36Ipdizs2LKp9eLO9FIzHhR6NsW7Z/QEVq1bHAiY
eBPUfQhqBoFApms6/nkzWfVuiydbE8QA4AgVMiCaRa8QZYbTyC+0Zxg1XJxes6rA/wIoDCtb
9SByLsST7A48Q9mT1rAiavmy+Po+fvYUfvY6fvYgPWxRxNF0BfcNGgCWDXMrYfXwheiClSdm
2KgDVqPYAY4A5HsAxGYxkhXuJ8PC+VOQvhRUjQPcBHyJZgLORMgqnQm4RREiV1FeuaHmQ+A6
QD+vUxkiZCX9HsrcI6ZzDBtnTdXG2Re0m5sboQvBOvYFyWftXltZeq85YFfsF7a4+/Hn/hJY
1guRNdfo6nhrZ4C4gqghpvOCDXXBmjA1yRUNh2L0YUgxw8cuZHNeA/nLSp9UFyJjUpXoPxtM
hl0wryzDXTwOxyZzC7zVcD2LqjB50dk4nkmqRiblHdwCrY9blHUDjEOKEZvJcF1ES5Wvi2nJ
8r5MCZC/F0j1bEjDSHWpAamuHhqpDuczXnufLh/am9J7Fv3cdcrRlJVUs5nLjFLVBsW+HnKS
lalafDEPA7fz2Xh5vEf+TykqLNMPs0ol/wwM9UV9MpxnQoaZywPyXzvuYDuWe8p3lNr+oxtP
NMnKVRt0q4N738V9VrAlAzukq4DrIqTYdixGim1HQmKnc+/N1Kx6LTMgsQtOHImxLyvdLS9J
WRtPOTipKqVMSWwl1eAxkLD2oyrTb/w2YDntXLLBsk7e1p4tB1NRNjCUl/RJ66wcSMsNf220
I3ycV44SkH7j8VNixuwMKuG0pOVGiuktG/wyk+bM8QAz2lMC8WIYoN1wj5npKuW2qBhpLTcg
rQtPHGmxub2epGniBldkV8yWH5WQ6Q4z+QhrsQV1SSvg4iSWW7k+6ibSayWI9BWdbYmtsmLF
mgA9oEKtzeKhLxiqC7P1qHVLyCSVaHXUEGOWQWokk/sZyHN++gS5NAeCrIC/LpyTC01Jm2tG
6EwYWkOYEGIYGnVlXQW3l8kIczw3nE6B3yKao/xbjGST14wgY5ysa9TIuhUGBLnmxBDkSG/o
6G71S9yslLtGNmJWkumndIbq6/EgqYrqk4MzB3Iw36yR/5J9Qgl3iMTtExZxaYq5fcISpBwA
KUWKIx/WvSsNuveiU757w+ruDY/K7j3foHvXju7uZd+OespCAaQYoe7nrluk/Xg4GQM1SdbW
xOoawjV10XAdmVoMGD7R7/SyPHU6M6HpxALbievl1Ol03sCgEzqdmQIthXROrtNXGXT6usLk
aaoJxql9IEm5TlEVED9UevHSUIz8G8i4o9/JnjxzNvnQJvvttiyczVQkHUypAzrclmUPq5xz
NrnIgrNJozK02H74fZjHBT2Uq30+YpblYqSYZxEwOjei+NN62/HfdzC/6d3TLmatQ4qzSUd6
I2otDCss1VCdTTK9waates4mL+SeEvpTO5tcwz1Vu6K0Q3nad+UBYq1GFpD9eqMTres0rWp6
onUtvMBGLLXwNHZFadOsF9o4wWTnBJMDutUGI56PU0/ya6Y+60wqqTVRmFnJ7K4o+bqylQGt
Xb0LsuDgMcXByulcLRbK6VxnGosLh4UFmRed352MYgm6ZG1zOMsZXS0+lTr4rBkWPlZPC2sx
KdbB5KJ8tEwsHy1jPKhXGHrIXJQPD5nrdOYqRqx1anjIJOtfxBDcbUgxdSagMDxk1khj07sJ
5N5Ztir0fdvYjDH/Yi5PZcy/GCkeMu3DUD65xFT55FJT5ZPLTJVPLjdUArlY00oV8FF4tY4S
CEsr/GeqCEP4zxT+M0+M/8yLkfCfmUInh//MS5AyXeAF53qd1bRMwUmeYjpMdnd16Lrpui2L
1izdCOPcdPVzbrpSOuoABOP9cHyTymFH5h4xOVmwHKwwEDn5JMjhJN2kS6VPHxy17dF301Wn
OPohrvSYzGxyy1oyVA67zTcE9bxnBhtisehc4vCqtn5uqKa+PkIcW9WSEzPBaDhK3EtGo1G6
9RZl7ipDoXBkLjkBWRcFt1eRcCg4N1xTWx8F11iRUB3+WxepgwQNsRB1eBcLBuVNvmhtHS0i
GqmtH6Dm0u48afAB2tEXDbdoPjsV0XCbSl3cjRnEhQld/iyZgIlyGnx+z8JsMR+T9CpMnOtB
b38z7iDidi+JyXc3tx+p7zvTzelYMOuE/AL1GG5fcgKwC4FpnF7+LGBPQhTzgcX8sJBdBuy7
HtKUIsVeGXnG3OyVAwGzo9u7oRw935mXGrB0q2WWviZ6Ffna02XpfzfQ3hltXjPp1Iq73m/B
a2aqgbD0dsCCOI8lymmRUC1xPxkOYbKvjxHndlHiZTIYCcZixFdsEDzdReqIN8vaYCwInu9C
sXCopqE2KDuqDEfqQzW1tTESC9eEoyHCNfWRhiBhynqiJxKJYQa+HsTXh1E60IU+uyYN2VUh
meF4y3RhxlBWHnpGhbdMprqwGSmu5Xo07HqZAbu2WWJXa65ub88yDlNm4Jh2v6SYJGjSGYf1
dKa0aah1I+me9DdKyr5F+V5xKNctzi3643CYG4c5Rk0VK9dNJRYc7i0gTEsE5g553KutJ5xR
H43WYYrH1F3TEKqP0HOrQeIzGo9QRPM0FGsAzgk2ROrwg0iD7DM6RFRoyIDGmCWIh8Caulio
QX4aCVLeqSMuosMNxBl1OFJLOJebCnw4KBi4UOGZeAcycnl7u2rMdeFUTqrXwyuVIaryVYli
mDGWYbgETvzGcWe04+cdGLo5Jt6edcxlTFzMMbFWF4gxsdY/ZCUQQAzy94NuI7NAfAk3pY5z
TNzOMXEHx8TdHBNv1zDx5QZMfJUlJjZeas1k5f15nlLTaTTHynoO6Qkrx4CVd9IpteL59jLO
If1xA4f0qZjCyk0lynJGyo1USx5Zx9/zCCvfARr/mC3qY1EyHw1jTiHeZusaiLfZunrCYaEQ
ZqhQLNhA1chD0XADTGGjMeKBti4WgYEwHKmr1fqbjdSFtbeCIeIBPhwjfBgM1oeoLl1tfT1x
ZE0GuC+cRBjp0JI+u+9RrdTz7L7fdIrt5tzTV+JJbTk6H/9eCZ6WrsUdRth8Oyb7FLcTdmte
ptiM3bXu6Su5KTZzB3s+UtzBXokU9/TXcuzezbH7do592Rd6FXyhZ3OFW2noUnBRTq5wT9a6
jww7D8UV7kVCZeGUdoXbjBRXuMr2Rb5c4X4EmbkUvAKZuRRcb/iUVPujyMjhYDOn7uwBXm2H
N7SOcpuz7OYP21Fuc5Zt/49o5joM2StRprM5fWSVJUM974gZi0JWkLrCAKkNlpFSFj30kMr4
9LWC1HoDpOKWkMqDZ8RmZO4Z8aMGCG6yhKAVDYEBulJdqZ/SGNlKZM2P75g8DLrZKir8+IpB
V/jxvRIpfnwzB93h+vH9mOmg22I66LaaDrobDAfdKzXCbwwIP4YLr0J3pWUVuiyD65VZhoyP
GSDVoiOorszX4JoNqRYDpDZaRmoIg2s2pFoNkGq3hFQeBtcrswyuGwwQTFhCMM+D65U5DK7M
CXEV57RqUS5OqyxU8NTzOhxAwmlVoTutIszwXcmBbDan7j3EqdeRZ7t0FfF2oQ/fadVGKKup
l3ufu97Sq+e0qo17iynlm79lg88h9tbFlt5iHtytliUL5F0aOVVlcjBgVy4HA3ah4bu62miC
nNb70a4hKdPzWKqV6e1pLNqGhUVuyvRafJRhyZHGJz4sfKwq02sx0XO91Z6PlokNt2XspkvQ
p1nywLUoLx64tHUUHriEBy7hgWszl0bxwEXu5sMDV5epZv0WU836a00167uRmVnHHkO9e76+
fiTbeiKS8jodvXuWVnjgEh64hKsl4YFLkMWo8MC1GQkPXIXigasLqaewbLju1VFTszhcCw9c
SFGbdXNqs5wHLmTBA1fqTMXNT4p64GqGw+QZ32zhYENNMMNNVkNdbShUW0N0woPB2jC4yaqv
iTQEqZZYfX1NfX19JBwbGLGc9YXGGmQsNEbK/5YTLcL3l3P+t1bjlr7gpPW/5QQGX4QU/1vL
keJ/azVS/G8xO5yMqbcYMPVWE6YW/rcMmXGo/rdqw5Fw/YD2hj5LjHb/W9cakNw2E5IT/rcs
kRz1MQCG3Zgud3n6GOjqdWEsdok6cSjUEB0wuK9PdCUZRDfy3recVHnY3PsWk31MAZgRWbcB
kW03ITLhFsmQyHLyvlU7JxCOULdaZEYwYC2ZPtmd7N63egzIbIcgs6GQ2Uh43+LJaTR635pg
yfvWIuF9a7iEZuZ9a74kg/C+JbxvdWrylLdpyN2xedimSZpu0/SabtNsNd2m2Wa6TbMdmXnf
2oHMvG9dh8y8b+003ADq1GwATYDR8yadDSCWNovhpXx53yILcAsk/0q2mbLXLm+m0Ps2+X4V
/vOYbRK9bsR/2uyR9P3xjklZPXQ9WdGkW+7LDqXcoz6l3JedSrlbXEq5frdSbr970spyNBG3
3jjbiLur0lHXyMnZlI5SQ0A3U52cjJLp5plp9lYnmZnPrMKq6YAgEEEgZsmU2XMnN3sel7GB
o5jbMvLsVo2/xCejT+Hf72EZ/Cyai1zSjLTEmyvJw2SDVI3WS5PRDvz7Rfz8Z9JcdBz/Pkit
TpZzMjJXj2/VMAh1w8ekh+pKyffJRsr3YGwgE75nCUawcOeS5PslFEt5GCqjmMrvEpzWw+YK
wWUH3CdrtV+Ed4ne1s8kOU8y8z8O99nHY1Lz8ciGv506H48Wh7+R9hzHjOyw65RDSdPi7FfZ
NTQb/mieLn2DAvs5Rzcpj3Ld4uVsH/o4ZztFnPGgIuJzaRMoIxI7Fxq3cQ31dbG5oZraEDlI
XxuJxOgPMTJVV0sc0DfUR6JpV3LUupXqRzaZw/4SGxwDJ7Q0fcZsQ8aMmc2PnRvPmd3oLHwd
4jZN6uH6HPxsMYbzMazF9y7DcCX1/qRlzHz5t2Neo6Zzn8dnIcXvHbOnVwLMzvI7B9ITnBbD
NWHM8+GaMOZaSD8GJmDMIMeVSO1pqteAMXcNjTGHs+CmvZ/NTx67bnIq18jFpXdl96XXb9f3
pZdycMZznIpAQC5OULg4QaFh5HIqkUmH6LrNy/Cfp5A9GMVQReBnYCQy1Wez803YLHMhUf6r
+OmrwjAew0TOZ98UYLPp+Hc2hiAmVcJ6jO0epN8nzBcFy9eK/z4vkLYdyJjVp4hTaiiB/UnG
QtORYtBhNrcPGeRYqJ5jIcZyVRzLMRbaasBCu08cCxn5AQzQjRFZcSBAFQqU66PcdYuNu89d
t9iz+wo8LumPqQHO9i/iWKWfc/TG2IaynIdjOW8/t7Gvdg2YEXIehgZGLGd9ZlqTAzMxz4QO
TL4OTO4OTIoOPHI4MCkrR8imwtg2C6eUN/bdwEgu3CcuHWbiPRYyj0BFSPGlwNxGeYH42aHO
cUixqjARKZZXpsLzMiQbbnQbbOozZmIMNAYYiI1HKzXj0TYDZuo7ccxk5PmQoBcAjRzewCq9
b+Puc9cBO3ffnt07YsCh7x1xv5cbX3zcRLFIuW7yK9eBYs6bYgkZj3ZC42Z6PGT7CFZ/1d4Q
o7FI2MLPwIeNgD5rbsuBNZmPRg/YTvXgkcODv8g8aD5nH3URfJisxuTejEE2wexGCQxbdMc5
3nejB+nbSPUAa85Git+GMFJ8Os6H6xLQjSkC1lzNsWYzN1W8gmPNDRxrJrhxbotmnNtuwJrX
nxjWPBkUD/QU0swcCabvc9fIzt23E0NtzA0ZdR5J/Q1q7+gTrycH4rWujCD/VdwPkhOaLgxu
apWM+ewp4dKXcRoxTEmMtRpzRVgJCxcSUqx1SUBobqQ2ErjDgNBSgtDyRGjhDEILn4qEdp0B
od1Q+IQ2VN+ZaVVdm3K9n7tushP/mtUwQ0yG6mrqw+FwTTQWrWkIhqM1sTryTRoL4wd1sQGr
CfXJcuoIkGWmJ84yDFUYJlCvnFqyZBYCmVdOpinPDLAyr5yVkI5ZK6yC6yogO95z504Dsrzx
1JV/2TxDpu/buPvcNaYdTjtw8dJwRPk3YHBfn+hKRlAWKr42PRh8GPxUDdVMFtqA6JijPDab
ZNrUzFHeGKR486oCAjL2JLqQ6uM04LnkNI4Y5Q9JRSdcceF2HrxbgT/u2PLrEvq7EPKan5e8
KlLy6W7F4MrCLAZXSL95UKbZw6G0lT9vXlBPJN2rN8Eq6Sd6t+sO33XFC0rttF3caK8URo/R
sfgM2nJlOMM2quYk73J9mapCs/GTvHOzh/WhkxOcJOxoQulFbyduSw835IylXy0OmhsxRPEv
DFHuuo67JuF9gP3UBC9bZOff/mAwM0SzPK/L8pwvGQHm7L5smmYMx3E2blZSlX5CaKYYKebv
x9E1AP1wvJHxnRL30JWgcnC4MwlNVnJo2rv/hYfJOH3XsQF48/jD6pyOP+xH9ztkLpLo2udU
PKzr4XB5kyrav4GLyzlU0hxOx9xbje5N70SaBSWV31Iqs/CtlB+prYF8A83hvp6thAOWSrKW
ry+nfEnqbzWp6yBZLkvKqSzr+RbllG+RTh1slsuy5VSW9Xz9OeXr19RBKgBakgqAlqQCoCVb
AdCSrQBoyTZqaemM1HWwvaKeDVw48dj3b7jgikYy6fW4lVrL7R+kXjc0437618aVq9KBT89u
UHp2s43Wai79hJfp6DJbhM6Q5PhltstsUS5+v+MyWx2N30znO9pAML8Fyr8VfvfA7xlQ20mG
8xC5th8xqe30psz+sWVQZvba6mNPMMmG/eRRjf0UpJ01MkpTZn1G2B/Vzjgflji3B9awR4bY
E0yyYT/VdAZ7vyO3ts8n9lbaPjCqsT8d6X8t9FugnBWGdI+Gjz3FJBv20/La9rlz7fDavnqU
Yj8+xTR4mM3HaXTc83FzkWq6WuHLmKOcrqwQlSpPAqkp9PmNzve9Xy4+Uv51Z8B3XfH95fKq
xkKc8jh6Pr3uQOoj51OGoFq0XmPQdtNTvR+HGuiP+6w0vTcDTTKGXvQ9V5//dk9L6dOur/jb
PQtKf+K63d/naS614d5RYzgztZfOByQUoUqMsiqjnOCLg/oY7mvuJ1K4/5aLDjb66eqNWfDS
FcW90mNUifIyG62Th3+a6WpkVrreX0Tfgk4o10yhWHs69OlJG9yqRHaTCZKknbogRZeSLcd4
kWKFRnsib2ZTMI1+KH01nE5HOguJmZ3u875V9JKvpbTGO87/E9+C0rHewaKnfcadXozj0YxO
X/wvXQT3/+E/nmxkiz/qTt+//2tp4LvVDp0uDaPTK0w6XRpKp9sLrNM3FB3yzy9uKb2l6I/+
scULSjuL/ttfU2zc6SU4XpfR6a+9p4sgW/FDX5y9XdPpqVQqDXy3OvLQ6ZX57nRHgXX6H4qu
LV6HO93uv7t4Hu70V4t2Fy8z6fRSHP/XoLbTu/Q7PTWx+M9UvO85fPhhdacfOXIkDXy3OvPQ
6WPy3elOnRX00dvpNvQbd7N3in+N7033du97RXN8Ps9e70tFYzB6Ybu606dlrH9z85B0KWM4
7OdR/PYMyjXbg1NdS3OMwPOzUhX0fdIR5bIdNRrm0FE5Yz9sLu1NKT3Vk+2+yVq2fujkNuRC
1+C/ZzVZarqAftORPEkzmDddnTdQ+aDPN+Yj3sWVd/n+XNntXV95ne83lflrugkOuekmOIj1
ncymK6dN51I1HdkCvKw5kezIaC//8NsLGbcXqbt5ez3n2FP0K+f8kg8c3yz6unNsyVjno0Wf
dH6AJ51BaTjt9XE7a69JQGozDUitgrZXEalOur1IJy/jiWwCRcSe0WguWtBINJ2cs1nT/aTE
7/926cHil0qC/ttL7yl+r2S5v7s0VTxcUrvDx5ruR0huOmI4Vq/pKmnTuVWkRmTb5SGgNeNm
I4UMtdkcAbNmu8OU4jxolmt8KfmkWu1aUCp/UpFf8kmlHdHkTzavKn9ZRdVGFzOnpbfN2WAy
3M8tgok59uSD8AuullLyQbgNpyefaOTXliP2U/KMPcPEDPsSdAFu+89i7Lsp5gtKP+KaXnq7
qxm3vc2mxl4Z+L5ElUOI8F8Ny8luk48wj4WBjr8/XDY1CvmocwXUufgUqnMl1LnkFKrzGKhz
6aip8/imFFVT2iPdIB8wW9TRuvGaQGtnW+DSTYlkHE+22VGbG1HApcx2s6FsFPhVLfLxT74F
yadBS0sLjZPfY8eOpRcGRkuaQgyif0QQQYRcwmspdrrhddRkV4Yf8r0xKJpHBBFyCq+jModa
D3CwAEdnkUakEWmsp1HGVhs3toqWEmlEmqFwkV1wkUgj0gyTixziO08EEYb4nce4yCm4SAQR
hslFLsFFIogwTC5yCy4SQYQhhdeaUk03pdUxFIs1X6XawcqK/tfSjmIUFS/5KJFX9ZRZfGFP
qV1hsDLj5KzMLBqilRltsKTlMRLK0h+qlRknWJmZI4XRZ6m1t2racoGhW5np725SmoC3MkPs
9TArMxuRYueljbuOc9ft3LXaygz/tp6VmDbN8yquKwY1peg9b8/yXLEyw45O2BDzDsmekFPU
5CwyUbIi52KtWJkpa1Li8qny02nLzUU1aJ6SQ+rrT/6JHD84un7zqwZWZkiQz3xOozkEUQi3
/NCszFTTHGoxBURztjKj9lNsnMo4CCszVssSVmbMUwsrMycfLQkrM8LKTL5oabRbmZmbMRv4
w8HPb78ksmHYVmZUOKdnNyg9u8m0MvOItJGzKvOI9IjUxsU/bn9EinPxpc5HpHYTqzOkJtls
KNQYzkvya7fFrPZDtwAxb1RjH0TaWeTIWJ0xwh6h4VidCZnOaPNntyV37K20fXhUY1+L9L8e
8m11JmfsLVmdieS17XPn2uG1fXSUYi9bnaFmtSF9fq3OJCtkqzNrKk6k1RlWmt6bilmCf3P9
rbjY01J6yFVV8r/uBaX3uv5VLJlYnZmE4xszbFE8oL+SxdYF+m3nHX040+oMb3xEXm8jVmfm
SJ+lVmcekYZqlqBKM6UaUaszzmGstH1Ytiiu8Nxf9IS3pfR6z5Gi//IuKL3Kc7DoZ17jTp+M
420Znf6WvtWZoz2Hf0etzthKXrRsdUbudGkYnT7WpNOHbHVGu842mjt9su8nvk8XtZQu9L3k
21y0oHSW71e+m4uMO30KjsczOj30vi6CgY1/fbmRrQBatToz/E4fl+9OdxRYp/+h6Hd+2erM
P/2y1Zk/+c2szkzF8XZk0epM/9rPPkvEe+pg8quWrc4Mv9PH57vTnQXV6bLVmelgdQb5Zasz
x06o1ZmAidWZRR+m1ZljWa3OTK940FdS+RHv8oq7fK9UdHtbKq7zHa7IX9NNsctNN8Wubwrk
9BNtdcakvUjdzdvriGNP0aPO+SV/d3yzaL9zbEmZ89GiPXm1OjMWSG2aAalNE1Zn1E1n3epM
9Wi0OvN7J7E6k6ywURsv5CNnaFZn5ubZbgvDxBx7Y6szoVQu2AdHmdUZMrzugk3oU8UayVio
8+RTqM7joM5TTqE6j4c6T0XC6oxBEFZnRk8Q/SOCCCLkEoTVGRFEyF8QVmdEGpFGpBFWZ0Qa
kUZYnRFpRBphdUYEEQrtO09YnRFBhHxxkbA6I4IIw+UiYXVGBBGGFk6M1ZloSr7npalXte7o
6k0GQgbGZppQnozNjISO9Ak2NlNHpwguqpDyAG1R3oAEgXqq9Wiji0Os7k7uWj4s5lK6JU+H
xYqQR/JIki/gnSPNkV70vu9ZLC2Wfu592UNwzKYQqmgZy9pJb3s8nnlgBGYOvf97XcMnlnSM
JH0dI4ah3ptMr6oIHfd6pH9UPOId45sjDVR82TvHt1g6VHGLdyi1es9zAGrlHLFaMQz1azW+
6XrEtrqz6FAJzSmzNIUYRP+IIIIIOc0XheaUCCLkcRVDaE6JNCKNSCM0p0QakUZoTok0Io3Q
nBJBhML6zhOaUyKIkC8uEppTIogwXC4SmlMiiDC0QDSnFH2paFMsreNEdGXWdHddHd+YDCQ6
27sMNZ34X6Nwqmg6ySbeWJ0UC8ZnNW1Ou4RS7G3+86tvlD8tdVJtmiXbt8S7E5vjncnAYuLC
rIva0wtF5gUj88LBcBB1UjONXLIVi3Eiut/SSXV4LuhKxjd0dV2jeuBRelG5WazKKN6tPPHK
yZNdG7s6lLv0B2K3o+nKNg8xPtv4+K9/fa5e3ypkFWuyp5o0nTuUIDX9fwAAAP//AwCeJvcz
</Template></GraphPadPrismFile>
