# Supplementary material for: Regulation of stem/progenitor cell maintenance by BMP5 in prostate homeostasis and cancer initiation
Source: eLife journal article supplement (doi:10.7554/elife.54542), 2020-09-07
Supplement: fig1-figsupp1-data1 [file elife-54542-fig1-figsupp1-data1-v2.pzfx]

<?xml version="1.0" encoding="UTF-8"?>
<GraphPadPrismFile xmlns="http://graphpad.com/prism/Prism.htm" PrismXMLVersion="5.00">
<Created>
<OriginalVersion CreatedByProgram="GraphPad Prism" CreatedByVersion="6.0.1.298" RegisteredTo="      " Login="Admin" DateTime="2020-07-16T13:21:41-05:00"/>
</Created>
<InfoSequence>
<Ref ID="Info0" Selected="1"/>
</InfoSequence>
<Info ID="Info0">
<Title>Project info 1</Title>
<Notes>
</Notes>
<Constant><Name>Experiment Date</Name><Value>2020-04-09</Value></Constant>
<Constant><Name>Experiment ID</Name><Value/></Constant>
<Constant><Name>Notebook ID</Name><Value/></Constant>
<Constant><Name>Project</Name><Value/></Constant>
<Constant><Name>Experimenter</Name><Value/></Constant>
<Constant><Name>Protocol</Name><Value/></Constant>
</Info>

<TableSequence>

<Ref ID="Table0"/>
<Ref ID="Table3"/>
<Ref ID="Table6"/>
<Ref ID="Table9" Selected="1"/>
</TableSequence>
<Table ID="Table0" XFormat="none" YFormat="SDN" TableType="TwoWay" EVFormat="AsteriskAfterNumber">
<Title>Fig1S1C</Title>
<RowTitlesColumn Width="81">
<Subcolumn>
<d>Krt5</d>
<d>Krt14</d>
<d>Trp63</d>
<d>Krt8</d>
<d>Krt18</d>
<d>Ly6a</d>
<d>Itga6</d>
<d>Epcam</d>
<d>Gata3</d>
</Subcolumn>
</RowTitlesColumn>
<YColumn Width="243" Decimals="2" Subcolumns="3">
<Title>Luminal</Title>
<Subcolumn>
<d>0.02</d>
<d>0.14</d>
<d>0.97</d>
<d>10.1</d>
<d>5.48</d>
<d>0.48</d>
<d>5.69</d>
<d>7.84</d>
<d>12.67</d>
</Subcolumn>
<Subcolumn>
<d>0.01</d>
<d>0</d>
<d>1.06</d>
<d>3.67</d>
<d>1.53</d>
<d>0.4</d>
<d>2.51</d>
<d>0.35</d>
<d>2.79</d>
</Subcolumn>
<Subcolumn>
<d>3</d>
<d>3</d>
<d>3</d>
<d>3</d>
<d>3</d>
<d>3</d>
<d>3</d>
<d>3</d>
<d>3</d>
</Subcolumn>
</YColumn>
<YColumn Width="243" Decimals="3" Subcolumns="3">
<Title>Stromal</Title>
<Subcolumn>
<d>0.01</d>
<d>0.1</d>
<d>0.81</d>
<d>0.4</d>
<d>0.52</d>
<d>10.19</d>
<d>0.46</d>
<d>0.17</d>
<d>0.199</d>
</Subcolumn>
<Subcolumn>
<d>0</d>
<d>0.01</d>
<d>1.12</d>
<d>0.54</d>
<d>0.59</d>
<d>2.38</d>
<d>0.38</d>
<d>0</d>
<d>0.03</d>
</Subcolumn>
<Subcolumn>
<d>3</d>
<d>3</d>
<d>3</d>
<d>3</d>
<d>3</d>
<d>3</d>
<d>3</d>
<d>3</d>
<d>3</d>
</Subcolumn>
</YColumn>
<YColumn Width="243" Decimals="2" Subcolumns="3">
<Title>Basal</Title>
<Subcolumn>
<d>9.79</d>
<d>10.72</d>
<d>7.66</d>
<d>2.57</d>
<d>2.35</d>
<d>7.98</d>
<d>11.16</d>
<d>12.67</d>
<d>3.68</d>
</Subcolumn>
<Subcolumn>
<d>0.48</d>
<d>1.05</d>
<d>1.38</d>
<d>0.07</d>
<d>0.15</d>
<d>1.63</d>
<d>4.04</d>
<d>0.98</d>
<d>0.99</d>
</Subcolumn>
<Subcolumn>
<d>3</d>
<d>3</d>
<d>3</d>
<d>3</d>
<d>3</d>
<d>3</d>
<d>3</d>
<d>3</d>
<d>3</d>
</Subcolumn>
</YColumn>
</Table>
<Table ID="Table3" XFormat="none" YFormat="SDN" TableType="TwoWay" EVFormat="AsteriskAfterNumber">
<Title>Luminal-Basal</Title>
<RowTitlesColumn Width="81">
<Subcolumn>
<d>Krt5</d>
<d>Krt14</d>
<d>Trp63</d>
<d>Krt8</d>
<d>Krt18</d>
<d>Ly6a</d>
<d>Itga6</d>
<d>Epcam</d>
<d>Gata3</d>
</Subcolumn>
</RowTitlesColumn>
<YColumn Width="243" Decimals="2" Subcolumns="3">
<Title>Luminal</Title>
<Subcolumn>
<d>0.02</d>
<d>0.14</d>
<d>0.97</d>
<d>10.1</d>
<d>5.48</d>
<d>0.48</d>
<d>5.69</d>
<d>7.84</d>
<d>12.67</d>
</Subcolumn>
<Subcolumn>
<d>0.01</d>
<d>0</d>
<d>1.06</d>
<d>3.67</d>
<d>1.53</d>
<d>0.4</d>
<d>2.51</d>
<d>0.35</d>
<d>2.79</d>
</Subcolumn>
<Subcolumn>
<d>3</d>
<d>3</d>
<d>3</d>
<d>3</d>
<d>3</d>
<d>3</d>
<d>3</d>
<d>3</d>
<d>3</d>
</Subcolumn>
</YColumn>
<YColumn Width="243" Decimals="2" Subcolumns="3">
<Title>Basal</Title>
<Subcolumn>
<d>9.79</d>
<d>10.72</d>
<d>7.66</d>
<d>2.57</d>
<d>2.35</d>
<d>7.98</d>
<d>11.16</d>
<d>12.67</d>
<d>3.68</d>
</Subcolumn>
<Subcolumn>
<d>0.48</d>
<d>1.05</d>
<d>1.38</d>
<d>0.07</d>
<d>0.15</d>
<d>1.63</d>
<d>4.04</d>
<d>0.98</d>
<d>0.99</d>
</Subcolumn>
<Subcolumn>
<d>3</d>
<d>3</d>
<d>3</d>
<d>3</d>
<d>3</d>
<d>3</d>
<d>3</d>
<d>3</d>
<d>3</d>
</Subcolumn>
</YColumn>
</Table>
<Table ID="Table6" XFormat="none" YFormat="SDN" TableType="TwoWay" EVFormat="AsteriskAfterNumber">
<Title>Stromal-Luminal</Title>
<RowTitlesColumn Width="81">
<Subcolumn>
<d>Krt5</d>
<d>Krt14</d>
<d>Trp63</d>
<d>Krt8</d>
<d>Krt18</d>
<d>Ly6a</d>
<d>Itga6</d>
<d>Epcam</d>
<d>Gata3</d>
</Subcolumn>
</RowTitlesColumn>
<YColumn Width="243" Decimals="2" Subcolumns="3">
<Title>Luminal</Title>
<Subcolumn>
<d>0.02</d>
<d>0.14</d>
<d>0.97</d>
<d>10.1</d>
<d>5.48</d>
<d>0.48</d>
<d>5.69</d>
<d>7.84</d>
<d>12.67</d>
</Subcolumn>
<Subcolumn>
<d>0.01</d>
<d>0</d>
<d>1.06</d>
<d>3.67</d>
<d>1.53</d>
<d>0.4</d>
<d>2.51</d>
<d>0.35</d>
<d>2.79</d>
</Subcolumn>
<Subcolumn>
<d>3</d>
<d>3</d>
<d>3</d>
<d>3</d>
<d>3</d>
<d>3</d>
<d>3</d>
<d>3</d>
<d>3</d>
</Subcolumn>
</YColumn>
<YColumn Width="243" Decimals="3" Subcolumns="3">
<Title>Stromal</Title>
<Subcolumn>
<d>0.01</d>
<d>0.1</d>
<d>0.81</d>
<d>0.4</d>
<d>0.52</d>
<d>10.19</d>
<d>0.46</d>
<d>0.17</d>
<d>0.199</d>
</Subcolumn>
<Subcolumn>
<d>0</d>
<d>0.01</d>
<d>1.12</d>
<d>0.54</d>
<d>0.59</d>
<d>2.38</d>
<d>0.38</d>
<d>0</d>
<d>0.03</d>
</Subcolumn>
<Subcolumn>
<d>3</d>
<d>3</d>
<d>3</d>
<d>3</d>
<d>3</d>
<d>3</d>
<d>3</d>
<d>3</d>
<d>3</d>
</Subcolumn>
</YColumn>
</Table>
<Table ID="Table9" XFormat="none" YFormat="SDN" TableType="TwoWay" EVFormat="AsteriskAfterNumber">
<Title>Basal-Stromal</Title>
<RowTitlesColumn Width="81">
<Subcolumn>
<d>Krt5</d>
<d>Krt14</d>
<d>Trp63</d>
<d>Krt8</d>
<d>Krt18</d>
<d>Ly6a</d>
<d>Itga6</d>
<d>Epcam</d>
<d>Gata3</d>
</Subcolumn>
</RowTitlesColumn>
<YColumn Width="243" Decimals="3" Subcolumns="3">
<Title>Stromal</Title>
<Subcolumn>
<d>0.01</d>
<d>0.1</d>
<d>0.81</d>
<d>0.4</d>
<d>0.52</d>
<d>10.19</d>
<d>0.46</d>
<d>0.17</d>
<d>0.199</d>
</Subcolumn>
<Subcolumn>
<d>0</d>
<d>0.01</d>
<d>1.12</d>
<d>0.54</d>
<d>0.59</d>
<d>2.38</d>
<d>0.38</d>
<d>0</d>
<d>0.03</d>
</Subcolumn>
<Subcolumn>
<d>3</d>
<d>3</d>
<d>3</d>
<d>3</d>
<d>3</d>
<d>3</d>
<d>3</d>
<d>3</d>
<d>3</d>
</Subcolumn>
</YColumn>
<YColumn Width="243" Decimals="2" Subcolumns="3">
<Title>Basal</Title>
<Subcolumn>
<d>9.79</d>
<d>10.72</d>
<d>7.66</d>
<d>2.57</d>
<d>2.35</d>
<d>7.98</d>
<d>11.16</d>
<d>12.67</d>
<d>3.68</d>
</Subcolumn>
<Subcolumn>
<d>0.48</d>
<d>1.05</d>
<d>1.38</d>
<d>0.07</d>
<d>0.15</d>
<d>1.63</d>
<d>4.04</d>
<d>0.98</d>
<d>0.99</d>
</Subcolumn>
<Subcolumn>
<d>3</d>
<d>3</d>
<d>3</d>
<d>3</d>
<d>3</d>
<d>3</d>
<d>3</d>
<d>3</d>
<d>3</d>
</Subcolumn>
</YColumn>
</Table>

<!--Analyses, graphs and layouts as compressed binary. Don't edit this part of the file.-->

<Template xmlns:dt="urn:schemas-microsoft-com:datatypes" dt:dt="bin.base64">eNrsvQ10VEW2L75POp0EBBQMyocXIol8RERAQFAnjQz4cQGTTHrQmcu8EUOHtDCgBghffYzP
8RsXkL5cnXlvlpHlvG5Zd8a5a41/ZaZ7cN6dO/DG67gSGeWBjCOylMeHpBNgjehK/6tO70oq
J9Wdqk6nPeZW6eaczqlTtfevfl2nTu2u2hXfvuOOO79z+yyjYQgA7DR2Gjnk35VwX87LUEL+
cl8OdEvss0Hkp6MA6MechopJAAvJWS6RVUTcRM6TLIMwJ01xkgDzuLi/syP9Wx4k7tFJJ510
0kknnb55iT7Tc/CZrpNOOumkk0466aSTTjrppJNOOumkk0466aSTTjrppJNOOumkk07/lZML
FpB/z1wJcHA0wHdcAEtyVe6nv7fzGwa4E7+wy4V/dqiheQ05ln75lsGJdPsj/hVrUhhMf5o4
jPu8M/ErQleOMQHLSfwEoWrzjx5YtwaSljOJyJXCckZgOdYPHOFe/9pVK4nUpdDnGmE5OVhO
4qcQXv+PfHVF9/jqi76z7kcr1vYop5jI0CT65M0PWIbQn12anWf/DAVcgyc+Gd0+5XT75Or2
KRc/PWedNRDZDYfyu8pLX1v9Y06ddNJJJ510+roTfTD/j85h0B9hY47+caZOX0fKmT/PGu8b
cMIamX7ccD98SD55iRj8iJp8OGh7ncnWN2UNP8YlfzjAfQ6NBPiP4QBFi5beAah3nTsx2uXT
TvKHMeQLN5/c32qv5HguNLzqgmvJKR2Fk+JgCJ7TEfMVnP2X2T5fhXnJ0B9G4DnVeSSe02/1
YLyHpXGY347taLyHQnsdntPXgCXkn5UpMGD3X9vNsgaP+Fyc+PoYDrw97G9M9zimSnJ+Pb65
jYKu5WOtra3dyqV/t9tRQaSUK+s75HxqBu1Ipusj9Oq83vUgfzF604N9DShHZxFpInL/XABW
xmToOjegyOIDvS6YIGD/65ThVFNTc2zDhg3xhx56SIuEUKwoZjyGPp/vyI4dO+InTpyIt7e3
a5EQihXFjGLHcKTYHj9+PH7mzJn4u+++q0VCKFYUM4odw5HylGLc3NysRUEoZhQ7Hsfz58/H
W1patCgIxUzjqHF0Oo6HDh3SoiAax/7D8cKFC/H3339fi4JQzDSOGken43j48GEtCqJx7D8c
L168GD9y5IgWBaGYaRw1jk7H8ejRo1oUROOocfwm4Hjs2DEtCqJx7D8cL126FD99+rQWBaGY
aRw1jk7HkfoStciLxlHj+E3A8ezZs1oUROPYfzh++eWX8XPnzmlREIqZxlHj6HQcW1tbtSiI
xrF/cYzFYloUROOocXQ6jl999VW8ra1Ni4JQzHgc6W/FT506ZY3PNT5yQrGimPG/s1+1qubD
Xbt2xU+ePGlhrKV3oVhRzCh2/Bqa5cuXH6yvr9drjCSFYkUx0yvYMpsWE5lPZDokQgMW4fpM
w7ZOla2XtH+eiLvr5HBrdGn693//9871l/TaWCyP5ZuDn++xrdXMB2iYzN03oWsdbFy0FvWq
rjWe1trKh4zEfRdsa5IjWDHdhmgpVBE7q2AFrIU668wHj4AfahRwW/TtmfV33XWL21pTOGtm
/e1WCStwffJdrl8V3eWaf3VLbrhkmXXuX7ty3UlypBv5zLKWjQLQv79OTt+84lY3zTvbAq8I
DHI8/+OZ9WxPgH8lZbAl2g11E+j5YXr/P+Pf4/mJ/J+uKnim9Xu3uGkxuZz853Sar8hCiuaj
5wfJ3/5+21X522cPsfKMunkIvLN0Tv1vze3LOwh21Cb691fmDIFnmqPr6T0rNyY2NGJHvn0Z
9i4B9rj3kMa+H7B3ceuxH+C+F8O588Xcd9nNrUfPtZ3fQaQQy/LeU1GRZyS+52/h2ne2tn0s
95mlK1AqsC9pwH6Fpifh887rk7m83XcVEKyCJjTydADKNYs8HU8RGY/HYjxeZx3Hd0y2jo92
TF10CZ5a9BDcuKiIHKn+t+Wo6X+G3mN0dWZ/hKeT6F/QQ+cZNv2nFubBB5tuhqPmrTB1RB7c
cGU+vLdhNny2fRF8sHkuuV4Ab363CKYMd8M7a6fDh4/eCoe3zoU/VE+B3//2HPj9X8D0qwaR
a9Pg8ObZEF1eAp9+8B78+fVfga/mPPzu+9fCwZUT4bUlY+DsJ3+D44ea4YcPfA5PT8yDF2YO
hp/OugyemZQP+17/DO79waewL9IGpz/+CCru/SvcWXkIyha/DbMXvQVTPW9A8bxfwDU3/RwK
p/0MhpW+QL4L0/lkGMaN48aNu5EeUaaNGjVqGj2i3MAn8nkqyT+VHlGuJ/mvp0eUUj6Rz1NI
/in0iDJx0qRJE8lxMkrRtRMmFJdcl0jkszFm7Nhr/mHcuPHkvvHk45WFI0dedfWoUaNJPaMN
Y8jQYZdffsXwEYlk5OUXDBpsXGZ0Jleu2+iWcrp9sn8f8o3uzyP+fDL3feSfX+y7yfZzoHsh
eHH/A8C9BuhebWVItydXvHj72qP/3+08p5Zwz02an+5o58G/s70W2HW/359j75tZ3fSavW5Q
rNvg6haVW6xoU7HAJlG5BpY3QbJclr+YK5ffDyLZGIPuB9GUm2j3Gzk72OcrOvvS9PaDoB2t
uC9J7Ach3g9xYO4HUV1dbfp8vviDDz4YX716tVDo9V72czAffvhh6/1g06ZNPWTdunW9wkbq
N+l77tatW+Pbtm3rJnV1dVKwr1271tyyZUu8oaEh/thjj3UK1UEWD6KDSe9/8skn40899ZQl
pmkqNTuxwaT3P/fcc/Ht27fHH3/8cWXaEL1Nei99b3322WfTot0TTzxh7ty5M/7888+nTVtS
t9mX+2ki95sD6TvDv+O0p3jH6T4mTicNscbCVL7O8fb/Nfo23p5r9G28zT9H2btmnsRz3YPP
jirJZ6sHn4Fe23PdleS57krxXGcPIJW6Da7uZM91FZuKBTYle65X4TNYplyWv5grV/Rcd9me
617MPwz1KsS5B76+ERwWS7hHMW9HBY7x8xX54EWdayXbxIt1+jPABy8eVeo2uLqT8UHFpmKB
Tcn4UIttVyvJh1os358mH7zIh2oBH7wCPvB2UD7MTIMPftQ5INkmfqzTzAAf/HhUqdvg6k7G
BxWbigU2JeNDANsuIMmHAJZvpskHP/Jhk4APfgEfeDsoH25Kgw8m6two2SYm1hnMAB/YAEml
boOrOxkfVGwqFtiUjA+N2HaNknxoxPKDafLBRD48L+CDKeADb0cFvvup8iGIOock2ySIdYYz
wIcg209ToW6DqzsZH1RsKhbYlIwPIWy7kCQfQlh+OE0+BJEPewR8CAr4wNtB+TA7DT6EUeeI
ZJuEsc5oBvgQZu8XCnUbXN3J+KBiU7HApmR8iGDbRST5EMHyo2nyIYx8eEPAh7CAD7wdFegL
U+VDFHU+INkmUayzJQN8iOJRpW6DqzsZH1RsKhbYlExf4PZzleFDM5bfkiYfosiHAwI+RAV8
4O2gfLgZ+WDfZ7fctsdvOu+mlVjGy6hjb3iw/HvQV9QX7jQp1t0kqFumLWTsf0nR/qYM2M/X
DYp1Gyk4Xom2qNhUaLNJBlfm63el8PW7OF9/pc3XvyeFr9+F3x8q9ZhvC5HLbfZs5upm3yE7
Ryvwdwy5Nr90ewq/tJ4vy+x8mQu/I8zHmqp/os3Cc3kk9hFTJLk8Etu+1Pb95Fwp3b6fuUn4
npukH7GXZ/++56bo71RsaRLYIqMn/xsYHn+Zc6rr00S+T+RqIi/ib3p4Xdm1wdx3rgp1bUJd
7yeykLC8DqphHWy0ftWxGTyWn92FzzMmbjzmcn/j+TFKYE+yZ5y9bVovvzxp29BrfNuUYtuU
SbZNKbaNR6FtensWlWK/XSbJ9VLUxZOE67Lc5OsuVaz7+l6eRWWKNpXZbJLBlX9WlOKzYp7g
WVEqeFbw7cg/K0S/qUnWR3mQO1WSNnqwTq8D+ygVW5oEtvRFz7jA7k7MyTUe8yrklSzmVaiv
N82+lOuHcvrax3pRH6rsvcg73gZ2zbD1sR60oQq6YlO4bb975PXsjbdebOtaSQy92NZ+B/JW
xZYmgS3Z4m0t8lYW81rU1+8g3i5D3voEvF0m4K0XbajNEG/92NYBSQz92NamA3mrYkuTwJZs
8TaAvJXFPID6mg7i7Wrk7RYBb1cLeOtHGwIZ4q2Jbd0oiaGJbR10IG9VbGkS2JIt3jYib2Ux
b0R9g30Y19vbPYhYhSR1CCJWYQe2u4otTQJbstXuIWx3WcxDqG84g+0eRqwikjqEEauoA9td
xZYmgS3ZavcItrss5hHUN+qg59RefE7tEzyn9gqeU2G0IZKh51QU2/qAJIZRbOsWB/JWxZYm
gS3Z4K2qX6oS/VJNinqm4yNi8/Rtkv4Elr9d4CNRbb+YYt0xQd19nZdj9rQq2h/LgP183aBY
dyof0R60RcWmQptNMrgyH1FuCh9RLucj2mPzEbWn8BHlcn0mWwj8tsBH9CeBj8jO0WTzfun4
LJjfqU1ynp/lb3egzyKmaEtMYEs2fBb0t3mvo1/irwKfBbuWz3HgFdQ1hrout3hQBBst39wG
a25jEOZlPgpX7z6KHNk+9tIvf9mNM6WIc5kkZ0oR52Rz/7K+j5hi3TFB3aJymY6tkj4Flj8m
8CnYyy3DcmWxKsNy0/EpHES93hb4FP4k8CnY2ybRt7x4u4pPgfkj2iTnt1n+dgf6FGKKtsQE
tmRjDLYH9WtVwLwK9XWCT2Eb9mlU2fcFPgV2rcDWB3rQhirsA28jbJ0O04jQ/2ZY+XMFPlp7
P6jyjsH8RW2S8+Asf7sDfQ8xRVtiAluyxe9a5Lcs5rWor99B/F6G/PYJ+L1MwG8v2lCbZX77
kRMBSaz9yAnTgfxWsSUmsCVb/A4gv2UxD6C+TvBRPI18pX6ITwU+CnZtsI3ffrQhgL+7Ydye
Sd6iZhF+3ww3JeV2prhuIj8aJXE3kR9BB3JdxZaYwJZscb0RuS6LeSPqG3QA13+M3G0g8hGR
HQKuN+D7F891E21o7Mb1mYThlOUzrPG5DNfT5XkQuRGSxDyI3Ag7kOcqtsQEtmSL5yHkuSzm
IdQ37CCe70aevyLg+W4Bz4NoQ8jG81mE5dNhbueaof7ieRi5EZHEPIzciDqQ5yq2xAS2ZIvn
EeS5LOYR1DfqoLHLXhy77BPwfK9g7BJGGyK2scsMwnB6nEc4399jlyjy44Ak7lHkR4sDua5i
S0xgixN9XXvQ1xVT1LO/30P3A938ryfW7Jr9PTSKNjTjeyjl+gxrfD7D6tF743kye9Lx6TG/
SrEh5/9h+Rcaffdpqbb/AqNn3X316aVr/4IM2M/XDYp1p/LptaOPTsWmQptN/eHTa7f59BYa
cj690ZjvGqOnT2+s0dOnZ+doJn16zE9IsZ0iie1I1MVpPr10vn92W7Lh06Pr4wqMhN+O4m73
6bFrbo4DFxD3BajrfUSWgs/aX5bu03NZin41L0P9ainqWybJk1LE1vM19Kv2upP1K8ymUgWb
aPnX91JumSJWZVhuOn680ag/7U/mCfqTUkF/wuOTjh+P+QCpjVWSNnqwTu8A6DfstmRjfNmO
viwVzKtQXyf48VZiP0aVHWr09OOxa7m2fs+DNrD1FmzOINnaSpX3JOaLpZjWSmLqxbb3DwAe
223JFo9rFTGvRX39DuLxMuSxT8DjZQIee9GGWo7HM2BWxnjsR0wDkpj6se3NAcBjuy3Z4nFA
EfMA6ms6iMerkcdbBDxeLeCxH20IcDyeR972M8VjEzFtlMTUxLYPDgAe223JFo8bFTFvRH2D
DuJxA/J4h4DHDQIem2hDI5YzA3vkfJsPIl0eBxHTkCSmQWz78ADgsd2WbPE4pIh5CPUNO4jH
u5HHrwh4vFvA4yDaEMJyZhMWz4K5GeuPw4hpRBLTMLZ9dADw2G5LtngcUcQ8gvpGHcTjvcjj
fQIe7xXwOIw2RLhxRSZ5HEVMD0hiGsW2bxkAPLbb4kR/WDv6kBYYzvCHMR7vRx4fEPB4v4DH
UbShmeuP55ARsiyPReva+Pk4tk8iw5XFqGN52VzfSg5jtnaS3UP3i5tqldnK5RLHd0mW+LZJ
phONM2NNSvaiR7pxZu6fm9j7jpZB+cHOWZwZer1nGphxZpyQampqjtEYMzqWp5xQrChmPIY+
n+/Ijh074idOnIi3t7drkRCKFcWMYsdwpNgeP348fubMmfi7776rRUIoVhQzPh4y5SnFuLm5
WYuCUMzscc7Pnz8fb2lp0aIgFDONo8bR6TgeOnRIi4JoHPsPxwsXLsTff/99LQpCMdM4ahyd
juPhw4e1KIjGsf9wvHjxYvzIkSNaFIRipnHUODodx6NHj2pREI2jxvGbgOOxY8e0KIjGsf9w
vHTpUvz06dNaFIRipnHUODodR+pL1CIvGkeN4zcBx7Nnz2pREI1j/+H45Zdfxs+dO6dFQShm
GkeNo9NxbG1t1aIgGsf+xTEWi2lREI2jxtHpOH711VfxtrY2LQpCMeNxpL8VP3XqlDU+1/jI
CcWKYsb/zn7VqpoPd+3aFT958qSFsZbehWJFMaPY8Wtoli9ffrC+vl6vMZIUihXFTK9gy2xa
TGS+tZY5sZ9fEa7PNHDPSJbYekn7Z9U9KXNse1LeA6n3pBSt9x3BrSPl16jStZUPGbjOlS3G
xBTBil05xoSlUEXsrLL2JqyzznzwCPihRgG3Rd+eWX/XXbe4rTWFs2bW326VsMJa+wlwl+tX
RXe55l/dkhsuWWad+9euXHeSHOlGH7MgseEH/TuNj/bmFbe6ad7ZFnhFYJDj+R/PrGeY/isp
g63nbqib4LK2vyX3/zP+PZ6fyP/pqoJnWr93i9tA7Jj853Sar8hCiuaj5wfJ3/5+21X522cP
sfKMunkIvLN0Tv1vze3LOwh21CZr/9w5Q+CZ5uh6es/KjRb8nUe+fRn2bgH2Ow2NfX9h7+bW
XT/AfS+Gc+eLue+yG/fpZO3Gn9+B+9LSsrz3VFTkGYnv+Vu4T/4QXEM9lvvM0hUoFdiXNGC/
QtOT8Hnn9clcXgOMlO1MaeTpAJRrFnk6niIyHo/FeLzOOo7vmGwdH+2YuugSPLXoIbhxURE5
Uv1vy1HT/wy9x+jqzP4ITyfRv6CHzjNs+k8tzIMPNt0MR81bYeqIPLjhynx4b8Ns+Gz7Ivhg
81xyvQDe/G4RTBnuhnfWTocPH70VDm+dC3+ongK//+058Pu/gOlXDSLXpsHhzbMhurwEPv3g
Pfjz678CX815+N33r4WDKyfCa0vGwNlP/gbHDzXDDx/4HJ6emAcvzBwMP511GTwzKR/2vf4Z
3PuDT2FfpA1Of/wRVNz7V7iz8hCULX4bZi96C6Z63oDieb+Aa276ORRO+xkMK32BfBem88kw
jBvHjRt3Iz2iTBs1atQ0ekS5gU/k81SSfyo9olxP8l9PjyilfCKfp5D8U+gRZeKkSZMmkuNk
lKJrJ0woLrkukchnY8zYsdf8w7hx48l948nHKwtHjrzq6lGjRpN6RhvGkKHDLr/8iuEjEsnI
yy8YNNi4zOhMrly30S3ldPtk/z7kG92fR/z5ZO77yD+/Uu1ZW4J7DVSA3D6sLH8l9H3P2nLF
ussFdYvKLcHy7lGwqQzLV9lbVnYf2BLo2kO2SlIfD9rptH1gyxVtKRfYko19VUpQv3sUMK9C
fZ2yD+xE3Ov1W9BzH9iJgn1gJyLW5dC1D+xiMi5ZD7M7Y9n2Zb+2EiyzAuT2JGX5K8F5+8CW
K9pSLrAlWzyuRR7LYl6L+jphH9g1yEu61+tC6LkPLLvmtvHYizbU4j7uCR7PsMbOdi73hc9+
5EBAEls/csB0IJ9VbCkX2JItPgeQz7KYB1Bf00F8pnu+LoKe+8Gya3Y++9GGAPLZS/j8EMyB
m0AcyytdPpvIgUZJbE3kQNCBfFaxpVxgS7b43Ih8lsW8EfUNOmic0YDjjB0CPjcIxhkm2tDY
bZwxN2PjjCC2fUgS0yC2fdiBPFaxpVxgS7Z4HEIey2IeQn3DDuqXd+M44xUBj3cL+uUg2hCy
jTPmZnicEUYORCSxDSMHog7ks4ot5QJbssXnCPJZFvMI6ht1UL+8F9/z9gn4vFfQL4fRhkjn
e+xmMspYkZF4iSWIDW37A5KYRrHtWxzIYxVbygW2OHF/2BLcH7YcnLE/LOuX9yOPDwh4vF/Q
L0fRhmbsl+8mvfIqwuM5WLbseDnZXOkwnFdl8+6FVn9PcyzdsGa9/6E1vqL1Ret9devritbV
FC3Z8CP/2hVrbliwom7FGhhsRZH6DlFjSW5X61D46ceFvjr/I76VRTUr1tT5ilb666rXbfQ9
srnokRXrfUWTK6cUbVyxZoOvqM5Hyl9XNGPa9OnTr5vWB++pgSizxHZvZik0EuA/hgMULVp6
B83tJVLnTkQz6+YhI38YQwyYb0C3/W6tdDwXGl51dc5yMs9OAT4lKYIl5D7qGqdR1m6x/kJB
of6VL61zgDetlqEstddNmX9r53fjNmt32sHYym6O/cnSt9Cn22RpxPy7ZViPAcPgVGeZDLMc
jklu1Cmfs8lj+ZRzUCw3TG5hV2tbviWaF2kiyk9YZXTLTzFbiIzw+/h7OlNB4jO9J8e6xypJ
nNElmzFXNqNbNmOebMZ82YwFshkH9cx4Byx0JzDfOlT/nkInnQZKyrGNf/qaWO9fAL3lgqaf
/ORV3Fe9lR7fuumLc3c64Jh0FID9I7Xs0XSE3v+q9ZzM5Z5aqWqTvyNH+Q6X8h1aK62V1kpr
pbXSWmmttFZaK63VfxWt5s3/uCEx73Q/fIizfLwObHaOn0/OxvubE2cn+c9s3pjOTPJrOkZy
89iDofs6FBbHy44t7zPh59ztccbsGLD7MxVnTLRGpbe4aMw/wThDfyPMl6vjpel4aV9X0vHS
dLw0HS9Nx0vTouOl6ThfGkcdL02Ljpem46XpOF8aR42Njpem46XpeGk6PpWO86Vx1PHSdJwv
LRpHHS9Nx0vT8dK06DhfGkcdL03Hp9I4ahx1vDQdL02Ljpem43xpHHW8NC06XpqOl6bjfGkc
NY46XpqOl6bjpWnR8dJ0vLRvQspUvLQc21plPl4avZZOvDSaN514afQ+HS8tezG7cjjsXaDj
pWUTez5ekI6XpuOl6XhpX2+8NBd0xUvLgdTx0gD3GigGudhiLD+L6cXvgc2u2/eszgHxntWs
LFCs24DU8dKKFW0qFtgkKtfA8iZIlsvyF0PqOGz2MQbdD6IpN9HuN3J2sM9XdPal6e0HQTta
cV+S2A+C38x8oO8HUV1dbfp8vviDDz4YX716tVDo9V72czAffvhh6/1g06ZNPWTdunW9wkbq
N+l77tatW+Pbtm3rJnV1dVKwr1271tyyZUu8oaEh/thjj3UK1UEWD6KDSe9/8skn40899ZQl
pmkqNTuxwaT3P/fcc/Ht27fHH3/8cWXaEL1Nei99b3322WfTot0TTzxh7ty5M/7888+nTVtS
t9mX+2ki95sD6TvDv+O0p3jH6T4mTicNscbCVL7O8fb/Nfo23p5r9G28zT9H2btmnsRz3YPP
Dpl4kSw/i3HIP9ddSZ7rrhTPdfYAUqnb4OpO9lxXsalYYFOy53oVPoNlymX5iyF1bE2X7bnu
xfzDUK9CnHvg6xvBYbGEexTzdlTgGD9fkQ9e1LlWsk280BUjsK988OJRpW6DqzsZH1RsKhbY
lIwPtdh2tZJ8qMXy/WnywYt8qBbwwSvgA28H5cPMNPjgR50Dkm3ih64Ye33lgx+PKnUbXN3J
+KBiU7HApmR8CGDbBST5EMDyzTT54Ec+bBLwwS/gA28H5cNNafDBRJ0bJdvEhK5YdX3lAxsg
qdRtcHUn44OKTcUCm5LxoRHbrlGSD41YfjBNPpjIh+cFfDAFfODtqMB3P1U+BFHnkGSbBKEr
1ltf+RBk+2kq1G1wdSfjg4pNxQKbkvEhhG0XkuRDCMsPp8mHIPJhj4APQQEfeDsoH2anwYcw
6hyRbJMwdMVM6ysfwuz9QqFug6s7GR9UbCoW2JSMDxFsu4gkHyJYfjRNPoSRD28I+BAW8IG3
owJ9Yap8iKLOByTbJIp1tmSAD1E8qtRtcHUn44OKTcUCm5LpCyAf845eb8byW9LkQxT5cEDA
h6iAD7wdlA83Ix/s++yW2/b4TefdtBLLeBl17A0Pln8P+or6wp0mxbqbBHXLtIWM/S8p2t+U
Afv5ukGxbiMFxyvRFhWbCm02yeDKfP2uFL5+F+frr7T5+vek8PWzGI9U6jEfjYd+uc2ezVzd
7Dtk52gF/o4h1+aXbk/hl9bzZZmdL3NBt9iZKfsnPi5sJbYh7SOmSHJ5JLZ9KTgrLmyToi1N
AltU462mE1f1aSLfJ3I1kRfxNz28ruzaYO47V4W6NqGu9wONle2HOqiGdbDR+lXHZvBYfnYX
dI+v6sajKBZ2no03vT3j7G3TevnlSduGXuPbphTbpkyybUqxbTygHrM32bOoFPvtMkmul6Iu
niRcl+UmX3epYt3X9/IsKlO0qcxmkwyu/LOiFJ8V8wTPilLBs4JvR/5ZIfpNTbI+yoPcqZK0
0YN1eh3YR6nY0iSwJRuxqytRv5cUMK9Cfb3w9ceu9qI+VNl7kXe8DeyaYetjPWhDFXTFpnBD
ejHXK1GPlyXn1ln+PQI/hBN4q2JLk8CWbPG2Fnkri3kt6ut3EG+XIW99At4uE/DWizbUZoi3
fmzrgCSGfmxr04G8VbGlSWBLtngbQN7KYh5AfU0H8XY18naLgLerBbz1ow2BDPHWxLZulMTQ
xLYOOpC3KrY0CWzJFm8bkbeymDeivsE+jOvt7R5ErEKSOgQRq7AD213FliaBLdlq9xC2uyzm
IdQ3nMF2DyNWEUkdwohV1IHtrmJLk8CWbLV7BNtdFvMI6ht10HNqLz6n9gmeU3sFz6kw2hDJ
0HMqim19QBLDKLZ1iwN5q2JLk8CWbPBW1S9ViX6pJkU90/ERsXn6Nkl/AsvfLvCRqLZfTLHu
mKDuvs7LMXtaFe2PZcB+vm5QrDuVj2gP2qJiU6HNJhlcmY8oN4WPKJfzEe2x+YjaU/iIcrk+
ky0EflvgI/qTwEdk52iyeb90fBbM79QmOc/P8rc70GcRU7QlJrAlGz4L+tu819Ev8VeBz4Jd
y+c48ArqGkNdl1s8KIKNlm9ugzW3MQjzMh+Fq3cfRY5sH3vpl7/sxplSxLlMkjOliHOyuX9Z
30dMse6YoG5RuUzHVkmfAssfE/gU7OWWYbmyWJVhuen4FA6iXm8LfAp/EvgU7G2T6FtevF3F
p8D8EW2S89ssf7sDfQoxRVtiAluyMQbbg/q1KmBehfo6waewDfs0quz7Ap8Cu1Zg6wM9aEMV
9oG3EbZOh2lE6H8zrPy5Ah+tvR9Uecdg/qI2yXlwlr/dgb6HmKItMYEt2eJ3LfJbFvNa1Nfv
IH4vQ377BPxeJuC3F22ozTK//ciJgCTWfuSE6UB+q9gSE9iSLX4HkN+ymAdQXyf4KJ5GvlI/
xKcCHwW7NtjGbz/aEMDf3TBuzyRvUbMIv2+Gm5JyO1NcN5EfjZK4m8iPoAO5rmJLTGBLtrje
iFyXxbwR9Q06gOs/Ru42EPmIyA4B1xvw/Yvnuok2NHbj+kzCcMryGdb4XIbr6fI8iNwISWIe
RG6EHchzFVtiAluyxfMQ8lwW8xDqG3YQz3cjz18R8Hy3gOdBtCFk4/kswvLpMLdzzVB/8TyM
3IhIYh5GbkQdyHMVW2ICW7LF8wjyXBbzCOobddDYZS+OXfYJeL5XMHYJow0R29hlBmE4Pc4j
nO/vsUsU+XFAEvco8qPFgVxXsSUmsMWJvq496OuKKerZ3++h+4Fu/tcTa3bN/h4aRRua8T2U
cn2GNT6fYfXovfE8mT3p+PSYX6XYkPP/sPwLjb77tFTbf4HRs+6++vTStX9BBuzn6wbFulP5
9NrRR6diU6HNpv7w6bXbfHoLDTmf3mjMd43R06c31ujp07NzNJM+PeYnpNhOkcR2JOriNJ9e
Ot8/uy3Z8OnR9XEFRsJvR3G3+/TYNTfHgQuI+wLU9T4iS8Fn7S9L9+m5LEW/mpehfrUU9S2T
5EkpYuv5GvpVe93J+hVmU6mCTbT863spt0wRqzIsNx0/3mjUn/Yn8wT9SamgP+HxScePx3yA
1MYqSRs9WKd3APQbdluyMb5sR1+WCuZVqK8T/HgrsR+jyg41evrx2LVcW7/nQRvYegs2Z5Bs
baXKexLzxVJMayUx9WLb+wcAj+22ZIvHtYqY16K+fgfxeBny2Cfg8TIBj71oQy3H4xkwK2M8
9iOmAUlM/dj25gDgsd2WbPE4oIh5APU1HcTj1cjjLQIerxbw2I82BDgezyNv+5nisYmYNkpi
amLbBwcAj+22ZIvHjYqYN6K+QQfxuAF5vEPA4wYBj020oRHLmYE9cr7NB5Euj4OIaUgS0yC2
fXgA8NhuS7Z4HFLEPIT6hh3E493I41cEPN4t4HEQbQhhObMJi2fB3Iz1x2HENCKJaRjbPjoA
eGy3JVs8jihiHkF9ow7i8V7k8T4Bj/cKeBxGGyLcuCKTPI4ipgckMY1i27cMAB7bbXGiP6wd
fUgLDGf4wxiP9yOPDwh4vF/A4yja0Mz1x3PICFmWx6J1bfx8HNsnkeHKYtSxvGyubyWHMVs7
ye6h+8VNtcps5XKJ47skS3zbJNOJxpmxJiV70SPdODP3z03sfUfLoPxg5yzODL3eMw3MODNO
SDU1NcdojBkdy1NOKFYUMx5Dn893ZMeOHfETJ07E29vbtUgIxYpiRrFjOFJsjx8/Hj9z5kz8
3Xff1SIhFCuKGR8PmfKUYtzc3KxFQShm9jjn58+fj7e0tGhREIqZxlHj6HQcDx06pEVBNI79
h+OFCxfi77//vhYFoZhpHDWOTsfx8OHDWhRE49h/OF68eDF+5MgRLQpCMdM4ahydjuPRo0e1
KIjGUeP4TcDx2LFjWhRE49h/OF66dCl++vRpLQpCMdM4ahydjiP1JWqRF42jxvGbgOPZs2e1
KIjGsf9w/PLLL+Pnzp3ToiAUM42jxtHpOLa2tmpREI1j/+IYi8W0KIjGUePodBy/+uqreFtb
mxYFoZjxONLfip86dcoan2t85IRiRTHjf2e/alXNh7t27YqfPHnSwlhL70KxophR7Pg1NMuX
Lz9YX1+v1xhJCsWKYqZXsGU2LSYy31rLnNjPrwjXZxq4ZyRLbL2k/bPqnpQ5tj0p74HUe1KK
1vuO4NaR8mtU6drKhwxc58oWY2KKYMWuHGPCUqgidlZZexPWWWc+eAT8UKOA26Jvz6y/665b
3Naawlkz62+3Slhhrf0EuMv1q6K7XPOvbskNlyyzzv1rV647SY50o49ZkNjwg/6dxkd784pb
3TTvbAu8IjDI8fyPZ9YzTP+VlMHWczfUTXBZ29+S+/8Z/x7PT+T/dFXBM63fu8VtIHZM/nM6
zVdkIUXz0fOD5G9/v+2q/O2zh1h5Rt08BN5ZOqf+t+b25R0EO2qTtX/unCHwTHN0Pb1n5UYL
/s4j374Me7cA+52Gxr6/sHdz664f4L4Xw7nzxdx32Y37dLJ248/vwH1paVneeyoq8ozE9/wt
3Cd/CK6hHst9ZukKlArsSxqwX6HpSfi88/pkLq8BRsp2pjTydADKNYs8HU8RGY/HYjxeZx3H
d0y2jo92TF10CZ5a9BDcuKiIHKn+t+Wo6X+G3mN0dWZ/hKeT6F/QQ+cZNv2nFubBB5tuhqPm
rTB1RB7ccGU+vLdhNny2fRF8sHkuuV4Ab363CKYMd8M7a6fDh4/eCoe3zoU/VE+B3//2HPj9
X8D0qwaRa9Pg8ObZEF1eAp9+8B78+fVfga/mPPzu+9fCwZUT4bUlY+DsJ3+D44ea4YcPfA5P
T8yDF2YOhp/OugyemZQP+17/DO79waewL9IGpz/+CCru/SvcWXkIyha/DbMXvQVTPW9A8bxf
wDU3/RwKp/0MhpW+QL4L0/lkGMaN48aNu5EeUaaNGjVqGj2i3MAn8nkqyT+VHlGuJ/mvp0eU
Uj6Rz1NI/in0iDJx0qRJE8lxMkrRtRMmFJdcl0jkszFm7Nhr/mHcuPHkvvHk45WFI0dedfWo
UaNJPaMNY8jQYZdffsXwEYlk5OUXDBpsXGZ0Jleu2+iWcrp9sn8f8o3uzyP+fDL3feSfX6n2
rC3BvQYqQG4fVpa/Evq+Z225Yt3lgrpF5ZZgefco2FSG5avsLSu7D2wJdO0hWyWpjwftdNo+
sOWKtpQLbMnGviolqN89CphXob5O2Qd2Iu71+i3ouQ/sRME+sBMR63Lo2gd2MRmXrIfZnbFs
+7JfWwmWWQFye5Ky/JXgvH1gyxVtKRfYki0e1yKPZTGvRX2dsA/sGuQl3et1IfTcB5Zdc9t4
7EUbanEf9wSPZ1hjZzuX+8JnP3IgIImtHzlgOpDPKraUC2zJFp8DyGdZzAOor+kgPtM9XxdB
z/1g2TU7n/1oQwD57CV8fgjmwE0gjuWVLp9N5ECjJLYmciDoQD6r2FIusCVbfG5EPsti3oj6
Bh00zmjAccYOAZ8bBOMME21o7DbOmJuxcUYQ2z4kiWkQ2z7sQB6r2FIusCVbPA4hj2UxD6G+
YQf1y7txnPGKgMe7Bf1yEG0I2cYZczM8zggjByKS2IaRA1EH8lnFlnKBLdnicwT5LIt5BPWN
Oqhf3ovvefsEfN4r6JfDaEOk8z12MxllrMhIvMQSxIa2/QFJTKPY9i0O5LGKLeUCW5y4P2wJ
7g9bDs7YH5b1y/uRxwcEPN4v6JejaEMz9st3k155FeHxHCxbdrycbK50GM6rsnn3Qqu/pzmW
bliz3v/QGl/R+qL1vrr1dUXraoqWbPiRf+2KNTcsWFG3Yg0MtqJIfYeosSS3q3Uo/PTjQl+d
/xHfyqKaFWvqfEUr/XXV6zb6Htlc9MiK9b6iyZVTijauWLPBV1TnI+WvK5oxbfr06ddN64P3
1ECUWWK7N7MUGgnwH8MBihYtvYPm9hKpcyeimXXzkJE/jCEGzDeg2363VjqeCw2vujpnOZln
pwCfkhTBEnIfdY3TKGu3WH8ZTZhM/StfWggBvGm1DGWpvW7K/Fut0gxs39usHWoHY0u7uW9A
svQtGGOVfhX3jRnNnTfBXVg7i+nW2XKC0tmdrNXs18vQBgOGwalOXVl75HAsdaO9+RxeHstf
zXSxXDy5hd30mW/lRQqK8hPGGt3y0/ZYiGzz+/h7OlNB4jO9J8e6xypJnNElmzFXNqNbNmOe
bMZ82YwFshkH9cx4Byx0JzDfOlT/VkMnnQZKyrGNrfqaWO9fAL3lgqaf/ORV3LO9lR7fuumL
c3c64Jh0hIH9I7Xs0XSE3v8vDTnWM/EF2IXPxhos/UrSww4hTxy/kRgl8jWPydaY6sWGEZaB
hvXTsBz2kxvycJ+TrgpDX5y/j86ewb75/6/zpzBsoPUv83/S+TrwqjWEyOUe6Cz5jZ4NIX9H
jvIdLuU7tFZaK62V1kprpbXSWmmttFZaq/8qWn08f15DYlruhFXSxw33QyG5c3tHd13Y5CjY
ph37O6lODlO9v9fPk8P8ZzZtTyeG+SU1Izk3wmDovgyIhVGzY8u7rHiXhz3Mmx0Ddn+mwryJ
lgj1FpaOuYcYZ+hPtPlydbg6Ha7u60o6XJ0OV6fD1elwdVp0uDodZk3jqMPVadHh6nS4Oh1m
TeOosdHh6nS4Oh2uTocH02HWNI46XJ0Os6ZF46jD1elwdTpcnRYdZk3jqMPV6fBgGkeNow5X
p8PVadHh6nSYNY2jDlenRYer0+HqdJg1jaPGUYer0+HqdLg6LTpcnQ5X901ImQpXl2Nbs8yH
q6PX0glXR/OmE66O3tf/4eqq6w8+PNJaPl0zq9oWMm2B68WiBa77/v4b9/zxp6xzGjLtPDnS
/cf/iSpOjvTvH5Lzu64bY+Vdbun4ayMRMq26M2TaQlJG5wLvfxtBz2P0/tvw74mQadX13q1w
Y0XBsh4h006Mofl+bSRCplXX0/O/kb+d3PWGe/k/JkKmnVxMQ6atqp+8/6VAImRaov71i2nI
tOBGek+ykGk5HPYuyEa4Oo29KFzTwAxXd7Xb0zHEnQhZt22sp+O2Oz0dK272dPzyNXJOQ9kN
9nS4YXzH/S6a71GS7xLlIvZlOlydDleXzXB1LugKV5cDqcPVAe41UAxyod1YfhZSjd+CnF23
bxmeA+Itw1lZoFi3AanD1RUr2lQssElUroHlTZAsl+UvhtRh8OxjDLofRFNuot1v5Oxgn6/o
7EvT2w+CdrTiviSxHwS/l/xA3w+iurra9Pl88QcffDC+evVqodDrveznYD788MPW+8GmTZt6
yLp163qFjdRv0vfcrVu3xrdt29ZN6urqpGBfu3atuWXLlnhDQ0P8scce6xSqgyweRAeT3v/k
k0/Gn3rqKUtM01RqdmKDSe9/7rnn4tu3b48//vjjyrQhepv0Xvre+uyzz6ZFuyeeeMLcuXNn
/Pnnn0+btqRusy/300TuNwfSd4Z/x2lP8Y7TfUycThpihW6m8nWOt9tz+jbenmv0bbzNP0fZ
u2aexHPdg88OmXCdLD8LMck/111JnuuuFM919gBSqdvg6k72XFexqVhgU7LnehU+g2XKZfmL
IXVoU5ftue7F/MNQr0Kce+DrG8FhsYR7FPN2VFhj/L9czFfkgxd1rpVsEy90hWjsKx+8eFSp
2+DqTsYHFZuKBTYl40Mttl2tJB9qsXx/mnzwIh+qBXzwCvjA20H5MBMeu0GVD37UOSDZJn7o
CnHYVz748ahSt8HVnYwPKjYVC2xKxocAtl1Akg8BLN9Mkw9+5MMmAR/8Aj7wdlA+3AQjhqry
wUSdGyXbxISuUIF95QMbIKnUbXB1J+ODik3FApuS8aER265Rkg+NWH4wTT6YyIfnBXwwBXzg
7aiw3v3u+t+qfAiiziHJNglCV6i9vvIhyPbTVKjb4OpOxgcVm4oFNiXjQwjbLiTJhxCWH06T
D0Hkwx4BH4ICPvB2UD7MhouPq/IhjDpHJNskDF0h6/rKhzB7v1Co2+DqTsYHFZuKBTYl40ME
2y4iyYcIlh9Nkw9h5MMbAj6EBXzg7aiwfGEv56nyIYo6H5BskyjW2ZIBPkTxqFK3wdWdjA8q
NhULbEqmL4B8yEF6vRnLb0mTD1HkwwEBH6ICPvB2UD7cDMe35Qv22S237fGbzrtpJZbxMurY
Gx4s/x70FfWFO02KdTcJ6pZpCxn7X1K0vykD9vN1g2LdRgqOV6ItKjYV2mySwZX5+l0pfP0u
ztdfafP170nh62chNqnUYz4ajv5ymz2bubrZd8jO0QrL9/fB5FybX7o9hV9az5dldr7MBd1C
l6bsn/iwvJXYhrSPmCLJ5ZHY9qXgrLC8TYq2NAlsUQ13m05Y26eJfJ/I1URexN/08Lqya4O5
71wV6tqEut5PuUhYXgfVsA42Wr/q2Awey8/ugu7hbd14FIUiz7PxJt1nXCniXibJoVLE3ZOE
QyptrlJ3k6DuZH18KfbxpQo2NeHvtFKVW4blymJVhuV6FDjK9+2l2LfPE/TtpYK+nccn0be7
/mdukt/AJOtTPNgmVZI2erBOrwP7FBVbmgS2ZCPUdyXq95IC5lWobzp6Jmt3L2JVK6mDF7Hy
O7DdVWxpEtiSrXavxXaXxbwW9fXD1x/i3Ys8XEbkXiI+mw3smmF7FnrRhlpgMUT2/3c3JA/l
3htv/djWAUkM/djWpgN5q2JLk8CWbPE2gLyVxTyA+poZ7K9MxKpRUgcTsQo6sN1VbGkS2JKt
dm/EdpfFvBH1DWaw3YOIVUhShyBiFXZgu6vY0iSwJVvtHsJ2l8U8hPqGM9juYcQqIqlDGLGK
OrDdVWxpEtiSrXaPYLvLYh5BfaMOGp/sxfHJPsH4ZK9gfBJGGyKd45OHV/VlfBLFtj4giWEU
27rFgbxVsaVJYEs2eKvqx6hEP0aTop7pzLewed02yflnlr9dMKeu2n4xxbpjgrrT6cdF9rcq
2h/LgP183aBYdyqfwh60RcWmQptNMrgyn0JuCp9CLudT2GPzKbSn8Cnkcn0mWzj6tsCn8CeB
T8HO0cS805tf5GZgjpv5Kdok54VZ/nYHznHHFG2JCWzJxhw3/S3X6ziP/VfBHDe7ls9x4BXU
NYa6Lrd4UAQbLV/OBvDBx28MwrxsTtvV+5x2Trp9bCniXCbJmVLE2ZOBPlal7pig7mR9TCn2
MaUKNsV6mdPeg3q2KmBVhuWmM6d9EPV6WzCn/SfBnLa9bRJ9y84qlTltNh/eJjm/yvK3O3BO
O6ZoS0xgSzbGYHtQv1YFzKtQX68D3h22YZ9GlT2MvONtYNcKbH2gB22owj5wOkyDGTAb5sJN
5HxmD1+eXdJ5x2D+ijbJeWSWv92Bc/cxRVtiAluyxe9a5Lcs5rWorxPm7p9GvtL5+U8Fc/fs
2mAbv71oQy36sSm/p1vMngk3E5bPIjzvjeN95bof+RGQxN2P/DAdyHUVW2ICW7LF9QByXRbz
AOprOqgvX419+RYB11cL+nI/2hDg+vK55G1qDunRZ5B/+6svN5ETjZJYm8iJoAP5rWJLTGBL
tvjdiPyWxbwR9Q06gN8/Rr42EPmIyA4Bv+m1QTZ+m2hDY7e+fAaR2diT7zsm05eny/MgciMk
iXkQuRF2IM9VbIkJbMkWz0PIc1nMQ6hv2EFjlt04ZnlFwPPdgjFLEG0I2cYscwjDZ5H/5pCR
S3+PWcLIj4gk7mHkR9SBXFexJSawJVtcjyDXZTGPoL5RB/Xpe7FP3yfg+l5Bnx5GGyKC8flM
mEfko5L+7NOjyI0DkphHkRstDuS5ii0xgS1O9HXtQV9XTFHP/ub5fuT5AQHP9wt4HkUbmrvx
fKbVo8+wzu74pC88T2femflXig05PxDLv9Dou29LlQcLjJ5199W3l679CzJgP183KNadyrfX
jr46FZsKbTb1h2+v3ebbW2jI+fZGY75rjJ6+vbFGT9+enaOJ+fdHI5nw7TF/IcV2iiS2I1EX
p/n20vn+2W3Jhm+PrqsqMBL+O4q73bfHrrk5DlxA3BegrvcRWQo+a1/SGfCbQZel6FfzMtSv
lqK+ZZI8KUVsPV9Dv2qvO1m/wmwqVbCJln99L+WWKWJVhuWm488bjfrT/mSeoD8pFfQnPD6J
/uS/bVfx5zFfILWxStJGD9bpHQD9ht2WbIwz29GnpYJ5FerrBH/eSuzHqLJDjZ7+PHYt19bv
edAGtm6BjTOTrclTeV9iPlmKaa0kpl5se/8A4LHdlmzxuFYR81rU1+8gHi9DHvsEPF4m4LEX
bajleDyDvCtlisd+xDQgiakf294cADy225ItHgcUMQ+gvqaDeLwaebxFwOPVAh770YYAx+N5
gvnbdHlsIqaNkpia2PbBAcBjuy3Z4nGjIuaNqG/QQTxuQB7vEPC4QcBjE21oxHJmYI/M+Jvb
Rx4HEdOQJKZBbPvwAOCx3ZZs8TikiHkI9Q07iMe7kcevCHi8W8DjINoQwnJmExbPgrkZ64/D
iGlEEtMwtn10APDYbku2eBxRxDyC+kYdxOO9yON9Ah7vFfA4jDZEuHFFJnkcRUwPSGIaxbZv
GQA8ttviRL9YO/qSFhjO8IsxHu9HHh8Q8Hi/gMdRtKGZ64/nkBGyLI9F69v4+Ti2vx7DlcU2
Y3nZXN9KDuMKnPNj99B9xqZaZbZyucRxQZIlvm2S6UTjk1iTkr3okW58kvvnJvZMo2VQfrBz
Fp+EXu+ZBmZ8EiekmpqaYzQ2iY4BKScUK4oZj6HP5zuyY8eO+IkTJ+Lt7e1aJIRiRTGj2DEc
KbbHjx+PnzlzJv7uu+9qkRCKFcWMj6NLeUoxbm5u1qIgFDN7fOzz58/HW1patCgIxUzjqHF0
Oo6HDh3SoiAax/7D8cKFC/H3339fi4JQzDSOGken43j48GEtCqJx7D8cL168GD9y5IgWBaGY
aRw1jk7H8ejRo1oUROOocfwm4Hjs2DEtCqJx7D8cL126FD99+rQWBaGYaRw1jk7HkfoStciL
xlHj+E3A8ezZs1oUROPYfzh++eWX8XPnzmlREIqZxlHj6HQcW1tbtSiIxrF/cYzFYloUROOo
cXQ6jl999VW8ra1Ni4JQzHgc6W/FT506ZY3PNT5yQrGimPG/s1+1qubDXbt2xU+ePGlhrKV3
oVhRzCh2/Bqa5cuXH6yvr9drjCSFYkUx0yvYMpsWE5lvrWVO7OdXhOszDdwzkiW2XtL+WXVP
yhzbnpT3QOo9KUXrfUdw60j5Nap0beVDBq5zZYsxMUWwYleOMWEpVBE7q6y9CeusMx88An6o
UcBt0ber6w8+PNJlrSmcVV1/u1XCCmvtJ8AC14tFC1z3/f037vnjT1nn/rUr150nR7rRxz8Z
iQ0/6N8/JOd3XTfGyrvc0vHXhkH+dv7H1fUM04WkjM713P82wmVta0vuvw3/Hs9P5PduhRsr
Cpa5DcSOyYkxNN+vDYoUzUfP/0b+dnLXG+7l/zjEynNy8RB4Z+mq+sn7Xwp0EOyoTfTv68nf
n2kObqT3rNxowQ/syLcvw94twH6nobHvL+zd3LrrB7jvxXDufDH3XXbjPp2s3fjzO3BfWlqW
956Kijwj8T1/C/dWHoJrqMdyn1m6AqUC+5IG7FdoehI+77w+mctrgJGynSmNPB1Xuz0dQ4gA
Od821tNx252ejhU3ezp++Ro5J3+DwZ4ON4zvuN9F8z1K8l2iXMS+jOp/W46a/mfoPUZXZ/ZH
eDqJ/gU9dJ5h039qYR58sOlmOGreClNH5MENV+bDextmw2fbF8EHm+eS6wXw5neLYMpwN7yz
djp8+OitcHjrXPhD9RT4/W/Pgd//BUy/ahC5Ng0Ob54N0eUl8OkH78GfX/8V+GrOw+++fy0c
XDkRXlsyBs5+8jc4fqgZfvjA5/D0xDx4YeZg+Omsy+CZSfmw7/XP4N4ffAr7Im1w+uOPoOLe
v8KdlYegbPHbMHvRWzDV8wYUz/sFXHPTz6Fw2s9gWOkLYBjT+US+GzeOGzfuRnpEmTZq1Khp
9IhyA5/I56kk/1R6RLme5L+eHlFK+UQ+TyH5p9AjysRJkyZNJMfJKEXXTphQXHJdIpHPxpix
Y6/5h3HjxpP7xpOPVxaOHHnV1aNGjSb1jDaMIUOHXX75FcNHJJKRl18waLBxmdGZXLluo1vK
6fbJ/n3IN7o/j/jzydz3kX9+pdqztgT3GqgAuX1YWf5K6PueteWKdZcL6haVW4Ll3aNgUxmW
r7K3rOw+sCXQtYdslaQ+HrTTafvAlivaUi6wJRv7qpSgfvcoYF6F+jplH9iJuNfrt6DnPrAT
BfvATkSsy6FrH9jFZFyyHmbDIG48kO7+QCVYZgXI7UnK8leC8/aBLVe0pVxgS7Z4XIs8lsW8
FvV1wj6wa5CXdK/XhdBzH1h2zW3jsRdtqMV93BM8pjvBnvrEzuW+8NmPHAhIYutHDpgO5LOK
LeUCW7LF5wDyWRbzAOprOojPdM/XRdBzP1h2zc5nP9oQQD57CZ8fsiJ77bxbFP8lXT6byIFG
SWxN5EDQgXxWsaVcYEu2+NyIfJbFvBH1DTponNGA44wdAj43CMYZJtrQ2G2cMTdj44wgtn1I
EtMgtn3YgTxWsaVcYEu2eBxCHstiHkJ9ww7ql3fjOOMVAY93C/rlINoQso0z5kLhVZkcZ4SR
AxFJbMPIgagD+axiS7nAlmzxOYJ8lsU8gvpGHdQv78X3vH0CPu8V9MthtCHS+R67mYwyVmQk
bmIJYkPb/oAkplFs+xYH8ljFlnKBLU7cH7YE94ctB2fsD8v65f3I4wMCHu8X9MtRtKEZ++W7
Sa+8ivB4Dnw74lIYLyebKx2G86ps3r3Qmo+n6C3dsGa9/6E1vqL1Ret9devritbVFFWtf2Td
j1asuWHJhh/5165YA4OtOFLfIYosye1qH9oAtNyFvjr/I76VRTUr1tT5ilb666rXbfQ9srno
kRXrfUWTK6cUbVyxZoOvqM5HalhXNGPa9OnTr5vWB/+pgTizxPZvZik0EuA/hgMULVp6B829
vQPge+5EPLNuPjLyhzHEnvkGdNvx1krHc6HhVVfnPCfz7RSgH4NiWELuo85xGmftFusvCVAM
+NI6B3jTahvKU3vdlPu3dn47brP2px2MbVvA8T9Z+hZ6dZus3MzDW4b1GDAUTnWWyTDLQZ7m
Iv/yuPoGWXNp12CuHOaIyS3sam3Lu0TzIlFE+QmvjG75KWYLkRF+H39PZypIfKb35Fj3WCWJ
M7pkM+bKZnTLZsyTzZgvm7FANuOgnhnvgIXuBOZbh+pfVOik00BJObYRUF8T6/0LoLdc0PST
n7yKO6u30uNbN31x7k4HHJOOAqDrafloOkLvf9V6TuZyT61UtcnfkaN8h0v5Dq2V1kprpbXS
WmmttFZaK62V1uq/ilbz5n/ckJh7uh8KyR10lo/Xgc3O8TPK2Xh/c+LsJP+ZzRzTmUl+VcdI
biZ7MHRficIiedmx5b0m/Ky7PdKYHQN2f6YijYlWqfQWGY15KBhn6K+E+XJ1xDQdMe3rSjpi
mo6YpiOm6YhpWnTENB3pS+OoI6Zp0RHTdMQ0HelL46ix0RHTdMQ0HTFNR6jSkb40jjpimo70
pUXjqCOm6YhpOmKaFh3pS+OoI6bpCFUaR42jjpimI6Zp0RHTdKQvjaOOmKZFR0zTEdN0pC+N
o8ZRR0zTEdN0xDQtOmKajpj2TUiZipiWY1urzEdMo9fSiZhG86YTMY3epyOmZS9qVw6HvQt0
xLRsYs9HDNIR03TENB0x7euNmOaCrohpOZA6YhrgXgPFIBddjOVnUb34XbDZdfuu1Tkg3rWa
lQWKdRuQOmJasaJNxQKbROUaWN4EyXJZ/mJIHYnNPsag+0E05Sba/UbODvb5is6+NL39IGhH
K+5LEvtB8NuZD/T9IKqrq02fzxd/8MEH46tXrxYKvd7Lfg7mww8/bL0fbNq0qYesW7euV9hI
/SZ9z926dWt827Zt3aSurk4K9rVr15pbtmyJNzQ0xB977LFOoTrI4kF0MOn9Tz75ZPypp56y
xDRNpWYnNpj0/ueeey6+ffv2+OOPP65MG6K3Se+l763PPvtsWrR74oknzJ07d8aff/75tGlL
6jb7cj9N5H5zIH1n+Hec9hTvON3HxOmkIUDHwlS+zvF2e07fxttzjb6Nt/nnKHvXzJN4rnvw
2SETMZLlZ1EO+ee6K8lz3ZXiuc4eQCp1G1zdyZ7rKjYVC2xK9lyvwmewTLksfzGkjq7psj3X
vZh/GOpViHMPfH0jOCyWcI9i3o4Ka4z/l4v5inzwos61km3iha4ogX3lgxePKnUbXN3J+KBi
U7HApmR8qMW2q5XkQy2W70+TD17kQ7WAD14BH3g7KB9mwmM3qPLBjzoHJNvED11R9vrKBz8e
Veo2uLqT8UHFpmKBTcn4EMC2C0jyIYDlm2nywY982CTgg1/AB94OyoebYMRQVT6YqHOjZJuY
0BWtrq98YAMklboNru5kfFCxqVhgUzI+NGLbNUryoRHLD6bJBxP58LyAD6aAD7wdFda7313/
W5UPQdQ5JNkmQeiK9tZXPgTZfpoKdRtc3cn4oGJTscCmZHwIYduFJPkQwvLDafIhiHzYI+BD
UMAH3g7Kh9lw8XFVPoRR54hkm4ShK2paX/kQZu8XCnUbXN3J+KBiU7HApmR8iGDbRST5EMHy
o2nyIYx8eEPAh7CAD7wdFZYv7OU8VT5EUecDkm0SxTpbMsCHKB5V6ja4upPxQcWmYoFNyfQF
kI96R683Y/ktafIhinw4IOBDVMAH3g7Kh5vh+LZ8wT675bY9ftN5N63EMl5GHXvDg+Xfg76i
vnCnSbHuJkHdMm0hY/9LivY3ZcB+vm5QrNtIwfFKtEXFpkKbTTK4Ml+/K4Wv38X5+ittvv49
KXz9LMojlXrMRyOiX26zZzNXN/sO2TlaYfn+Ppica/NLt6fwS+v5sszOl7mgW/TMlP0THxm2
EtuQ9hFTJLk8Etu+FJwVGbZJ0ZYmgS2qEVfTiaz6NJHvE7mayIv4mx5eV3ZtMPedq0Jdm1DX
+ykXCcvroBrWwUbrVx2bwWP52V3QPcKqG4+iaNh5Nt6k+4wrRdzLJDlUirh7knBIpc1V6m4S
1J2sjy/FPr5UwaYm/J1WqnLLsFxZrMqwXI8CR/m+vRT79nmCvr1U0Lfz+CT6dtf/zE3yG5hk
fYoH26RK0kYP1ul1YJ+iYkuTwJZsRJuuRP1eUsC8CvVNR89k7e5FrGoldfAiVn4HtruKLU0C
W7LV7rXY7rKY16K+fvj6o4x7kYfLiNxLxGezgV0zbM9CL9pQCyyGyP7/7obk0cR7460f2zog
iaEf29p0IG9VbGkS2JIt3gaQt7KYB1BfM4P9lYlYNUrqYCJWQQe2u4otTQJbstXujdjuspg3
or7BDLZ7ELEKSeoQRKzCDmx3FVuaBLZkq91D2O6ymIdQ33AG2z2MWEUkdQgjVlEHtruKLU0C
W7LV7hFsd1nMI6hv1EHjk704PtknGJ/sFYxPwmhDpHN88vCqvoxPotjWByQxjGJbtziQtyq2
NAlsyQZvVf0YlejHaFLUM535Fjav2yY5/8zytwvm1FXbL6ZYd0xQdzr9uMj+VkX7Yxmwn68b
FOtO5VPYg7ao2FRos0kGV+ZTyE3hU8jlfAp7bD6F9hQ+hVyuz2QLR98W+BT+JPAp2DmamHd6
84vcDMxxMz9Fm+S8MMvf7sA57piiLTGBLdmY46a/5Xod57H/KpjjZtfyOQ68grrGUNflFg+K
YKPly9kAPvj4jUGYl81pu3qf085Jt48tRZzLJDlTijh7MtDHqtQdE9SdrI8pxT6mVMGmWC9z
2ntQz1YFrMqw3HTmtA+iXm8L5rT/JJjTtrdNom/ZWaUyp83mw9sk51dZ/nYHzmnHFG2JCWzJ
xhhsD+rXqoB5FerrdcC7wzbs06iyh5F3vA3sWoGtD/SgDVXYB06HaTADZsNcuImcz+zhy7NL
Ou8YzF/RJjmPzPK3O3DuPqZoS0xgS7b4XYv8lsW8FvV1wtz908hXOj//qWDunl0bbOO3F22o
RT825fd0i9kz4WbC8lmE571xvK9c9yM/ApK4+5EfpgO5rmJLTGBLtrgeQK7LYh5AfU0H9eWr
sS/fIuD6akFf7kcbAlxfPpe8Tc0hPfoM8m9/9eUmcqJREmsTORF0IL9VbIkJbMkWvxuR37KY
N6K+QQfw+8fI1wYiHxHZIeA3vTbIxm8TbWjs1pfPIDIbe/J9x2T68nR5HkRuhCQxDyI3wg7k
uYotMYEt2eJ5CHkui3kI9Q07aMyyG8csrwh4vlswZgmiDSHbmGUOYfgs8t8cMnLp7zFLGPkR
kcQ9jPyIOpDrKrbEBLZki+sR5Los5hHUN+qgPn0v9un7BFzfK+jTw2hDRDA+nwnziHxU0p99
ehS5cUAS8yhyo8WBPFexJSawxYm+rj3o64op6tnfPN+PPD8g4Pl+Ac+jaENzN57PtHr0GdbZ
HZ/0hefpzDsz/0qxIecHYvkXGn33banyYIHRs+6++vbStX9BBuzn6wbFulP59trRV6diU6HN
pv7w7bXbfHsLDTnf3mjMd43R07c31ujp27NzNDH//mgkE7495i+k2E6RxHYk6uI031463z+7
Ldnw7dF1VQVGwn9Hcbf79tg1N8eBC4j7AtT1PiJLwWftSzoDfjPoshT9al6G+tVS1LdMkiel
iK3na+hX7XUn61eYTaUKNtHyr++l3DJFrMqw3HT8eaNRf9qfzBP0J6WC/oTHJ9Gf/LftKv48
5gukNlZJ2ujBOr0DoN+w25KNcWY7+rRUMK9CfZ3gz1uJ/RhVdqjR05/HruXa+j0P2sDWLbBx
ZrI1eSrvS8wnSzGtlcTUi23vHwA8ttuSLR7XKmJei/r6HcTjZchjn4DHywQ89qINtRyPZ5B3
pUzx2I+YBiQx9WPbmwOAx3ZbssXjgCLmAdTXdBCPVyOPtwh4vFrAYz/aEOB4PE8wf5suj03E
tFESUxPbPjgAeGy3JVs8blTEvBH1DTqIxw3I4x0CHjcIeGyiDY1YzgzskRl/c/vI4yBiGpLE
NIhtHx4APLbbki0ehxQxD6G+YQfxeDfy+BUBj3cLeBxEG0JYzmzC4lkwN2P9cRgxjUhiGsa2
jw4AHtttyRaPI4qYR1DfqIN4vBd5vE/A470CHofRhgg3rsgkj6OI6QFJTKPY9i0DgMd2W5zo
F2tHX9ICwxl+Mcbj/cjjAwIe7xfwOIo2NHP98RwyQpblsWh9Gz8fx/bXY7iy2GYsL5vrW8lh
XIFzfuweus/YVKvMVi6XOC5IssS3TTKdaHwSa1KyFz3SjU9y/9zEnmm0DMoPds7ik9DrPdPA
jE/ihFRTU3OMxibRMSDlhGJFMeMx9Pl8R3bs2BE/ceJEvL29XYuEUKwoZhQ7hiPF9vjx4/Ez
Z87E3333XS0SQrGimPFxdClPKcbNzc1aFIRiZo+Pff78+XhLS4sWBaGYaRw1jk7H8dChQ1oU
ROPYfzheuHAh/v7772tREIqZxlHj6HQcDx8+rEVBNI79h+PFixfjR44c0aIgFDONo8bR6Tge
PXpUi4JoHDWO3wQcjx07pkVBNI79h+OlS5fip0+f1qIgFDONo8bR6ThSX6IWedE4ahy/CTie
PXtWi4JoHPsPxy+//DJ+7tw5LQpCMdM4ahydjmNra6sWBdE49i+OsVhMi4JoHDWOTsfxq6++
ire1tWlREIoZjyP9rfipU6es8bnGR04oVhQz/nf2q1bVfLhr1674yZMnLYy19C4UK4oZxY5f
Q7N8+fKD9fX1eo2RpFCsKGZ6BVtm02Ii8621zIn9/IpwfaaBe0ayxNZL2j+r7kmZY9uT8h5I
vSelaL3vCG4dKb9Gla6tfMjAda5sMSamCFbsyjEmLIUqYmeVtTdhnXXmg0fADzUKuC36dnX9
wYdHuqw1hbOq62+3Slhhrf0EWOB6sWiB676//8Y9f/wp69y/duW68+RIN/r4JyOx4Qf9+4fk
/K7rxlh5l1s6/towyN/O/7i6nmG6kJTRuZ7730a4rG1tyf234d/j+Yn83q1wY0XBMreB2DE5
MYbm+7VBkaL56PnfyN9O7nrDvfwfh1h5Ti4eAu8sXVU/ef9LgQ6CHbWJ/n09+fszzcGN9J6V
Gy34gR359mXYuwXY7zQ09v2FvZtbd/0A970Yzp0v5r7Lbtynk7Ubf34H7ktLy/LeU1GRZyS+
52/h3spDcA31WO4zS1egVGBf0oD9Ck1Pwued1ydzeQ0wUrYzpZGn42q3p2MIESDn28Z6Om67
09Ox4mZPxy9fI+fkbzDY0+GG8R33u2i+R0m+S5SL2JdR/W/LUdP/DL3H6OrM/ghPJ9G/oIfO
M2z6Ty3Mgw823QxHzVth6og8uOHKfHhvw2z4bPsi+GDzXHK9AN78bhFMGe6Gd9ZOhw8fvRUO
b50Lf6ieAr//7Tnw+7+A6VcNItemweHNsyG6vAQ+/eA9+PPrvwJfzXn43fevhYMrJ8JrS8bA
2U/+BscPNcMPH/gcnp6YBy/MHAw/nXUZPDMpH/a9/hnc+4NPYV+kDU5//BFU3PtXuLPyEJQt
fhtmL3oLpnregOJ5v4Brbvo5FE77GQwrfQEMYzqfyHfjxnHjxt1IjyjTRo0aNY0eUW7gE/k8
leSfSo8o15P819MjSimfyOcpJP8UekSZOGnSpInkOBml6NoJE4pLrksk8tkYM3bsNf8wbtx4
ct948vHKwpEjr7p61KjRpJ7RhjFk6LDLL79i+IhEMvLyCwYNNi4zOpMr1210SzndPtm/D/lG
9+cRfz6Z+z7yz69Ue9aW4F4DFSC3DyvLXwl937O2XLHuckHdonJLsLx7FGwqw/JV9paV3Qe2
BLr2kK2S1MeDdjptH9hyRVvKBbZkY1+VEtTvHgXMq1Bfp+wDOxH3ev0W9NwHdqJgH9iJiHU5
dO0Du5iMS9bDbBjEjQfS3R+oBMusALk9SVn+SnDePrDliraUC2zJFo9rkceymNeivk7YB3YN
8pLu9boQeu4Dy665bTz2og21uI97gsd0J9hTn9i53Bc++5EDAUls/cgB04F8VrGlXGBLtvgc
QD7LYh5AfU0H8Znu+boIeu4Hy67Z+exHGwLIZy/h80NWZK+dd4viv6TLZxM50CiJrYkcCDqQ
zyq2lAtsyRafG5HPspg3or5BB40zGnCcsUPA5wbBOMNEGxq7jTPmZmycEcS2D0liGsS2DzuQ
xyq2lAtsyRaPQ8hjWcxDqG/YQf3ybhxnvCLg8W5BvxxEG0K2ccZcKLwqk+OMMHIgIoltGDkQ
dSCfVWwpF9iSLT5HkM+ymEdQ36iD+uW9+J63T8DnvYJ+OYw2RDrfYzeTUcaKjMRNLEFsaNsf
kMQ0im3f4kAeq9hSLrDFifvDluD+sOXgjP1hWb+8H3l8QMDj/YJ+OYo2NGO/fDfplVcRHs+B
b0dcCuPlZHOlw3Belc27F1rz8RS9pRvWrPc/tMZXtL5ova9ufV3RupqiqvWPrPvRijU3LNnw
I//aFWtgsBVH6jtEkSW5Xe1DG4CWu9BX53/Et7KoZsWaOl/RSn9d9bqNvkc2Fz2yYr2vaHLl
lKKNK9Zs8BXV+UgN64pmTJs+ffp10/rgPzUQZ5bY/s0shUYC/MdwgKJFS++gubd3AHzPnYhn
1s1HRv4whtgz34BuO95a6XguNLzq6pznZL6dAvRjUAxLyH3UOU7jrN1i/WU0UFAM+NJCCOBN
q20oT+11U+7fapVm4NXbrD1qB2P7FnDfgWTpWzDGKv16Lu9U7rwJ7sLac9BznKo0didrNfv1
MrTBgKFwqlNX1h45+B3IRW7ncXYMsubpruF0sZw8uYVdTLI8VzQvklCUn3DW6JaftsdCZJvf
x9/TmQoSn+k9OdY9VknijC7ZjLmyGd2yGfNkM+bLZiyQzTioZ8Y7YKE7gfnWofrXGjrpNFBS
jm101dfEev8C6C0XNP3kJ6/iru2t9PjWTV+cu9MBx6QjDOh6Cj+ajtD7/6WBIj4MXoBdkBgr
1WArXEl62CHkieM3EuNEvuYx2RpTvdgwwjKQ/ihkDuSwH92Qh/ucdFUYOq1zyB/ETfwV9Jm/
j869wb75/6/zhzRskPYv83/SWfKrVsm53GAgVSPK35GjfIdL+Q6tldZKa6W10lpprbRWWiut
ldbqv4pWH8+f15CYKDxhlfRxw/2wxDDgD7afpbOJVd4ZkI3XY9WJZap3fT9PLPOf2aQ/nVTm
F+SM5JwQg6H7IiIWhM2OLe/w4h0m9iBxdgzY/ZkKEidaYNRbUDvmXGKcoT/w5svVwe50sLuv
K+lgdzrYnQ52p4PdadHB7nSQNo2jDnanRQe708HudJA2jaPGRge708HudLA7HVxMB2nTOOpg
dzpImxaNow52p4Pd6WB3WnSQNo2jDnang4tpHDWOOtidDnanRQe700HaNI462J0WHexOB7vT
Qdo0jhpHHexOB7vTwe606GB3OtjdNyFlKthdjm3NMh/sjl5LJ9gdzZtOsDt6XzaC3b3VdneS
gGt3uyqK7nbd95do7sFRu6xzGnDtRXKku5e/Yi0bBaB/v46uQR5a5g7/n9/l/twC77UeAdf+
k5TBFnjP3/wyuVpwB73/D/h3FnDN8x340dwb/pdhD7i2fDjN9xoXcO014z7yt4O3fOJ+cWQi
4FrJ1YmAa4+dPf0SH3DtV1exgGuvJQ24lsNh74LsBLvT2PcM9jQwg9115Ho62nITQe2Gks8X
2WdISDxOZXzHX8gR4o8SuQR/jCeC3f0mroPd6WB32Qx254KuYHc5kDrYHeBeA8UgFxiO5WcB
2fgNzNl1+4bjOSDecJyVBYp1G5A62F2xok3FAptE5RpY3gTJcln+YkgdRM8+xqD7QTTlJtr9
Rs4O9vmKzr40vf0gaEcr7ksS+0HwO9EP9P0gqqurTZ/PF3/wwQfjq1evFgq93st+DubDDz9s
vR9s2rSph6xbt65X2Ej9Jn3P3bp1a3zbtm3dpK6uTgr2tWvXmlu2bIk3NDTEH3vssU6hOsji
QXQw6f1PPvlk/KmnnrLENE2lZic2mPT+5557Lr59+/b4448/rkwbordJ76Xvrc8++2xatHvi
iSfMnTt3xp9//vm0aUvqNvtyP03kfnMgfWf4d5z2FO843cfE6aQhQAezVL7O8fayUX0bb881
+jbe5p+j7F0zT+K57sFnh0ywT5afBajkn+uuJM91V4rnOnsAqdRtcHUne66r2FQssCnZc70K
n8Ey5bL8xZA6MKrL9lz3Yv5hqFchzj3w9Y3gsFjCPYp5OypwjJ+vyAcv6lwr2SZe6Arw2Fc+
ePGoUrfB1Z2MDyo2FQtsSsaHWmy7Wkk+1GL5/jT54EU+VAv44BXwgbeD8mFmGnzwo84ByTbx
Q1eAxL7ywY9HlboNru5kfFCxqVhgUzI+BLDtApJ8CGD5Zpp88CMfNgn44BfwgbeD8uGmNPhg
os6Nkm1iQlegwb7ygQ2QVOo2uLqT8UHFpmKBTcn40Iht1yjJh0YsP5gmH0zkw/MCPpgCPvB2
VOC7nyofgqhzSLJNgtAVqK+vfAiy/TQV6ja4upPxQcWmYoFNyfgQwrYLSfIhhOWH0+RDEPmw
R8CHoIAPvB2UD7PT4EMYdY5ItkkYugLe9ZUPYfZ+oVC3wdWdjA8qNhULbErGhwi2XUSSDxEs
P5omH8LIhzcEfAgL+MDbUYG+MFU+RFHnA5JtEsU6WzLAhygeVeo2uLqT8UHFpmKBTcn0BZAP
WEivN2P5LWnyIYp8OCDgQ1TAB94OyoebkQ/2fXbLbXv8pvNuWollvIw69oYHy78HfUV94U6T
Yt1Ngrpl2kLG/pcU7W/KgP183aBYt5GC45Voi4pNhTabZHBlvn5XCl+/i/P1V9p8/XtS+PpZ
gE4q9ZiPBrO/3GbPZq5u9h2yc7QCf8eQa/NLt6fwS+v5sszOl7mgW+DTlP0TH9S3EtuQ9hFT
JLk8Etu+FJwV1LdJ0ZYmgS2qwXLTCYr7NJHvE7mayIv4mx5eV3ZtMPedq0Jdm1DX+4EGOvdD
HVTDOtho/apjM3gsP7sLugfHdeNRFMg8z8abdJ9xpYh7mSSHShF3TxIOqbS5St1NgrqT9fGl
2MeXKtjUhL/TSlVuGZYri1UZlutR4Cjft5di3z5P0LeXCvp2Hh++bxf9BiZZn+LBNqmStNGD
dXod2Keo2NIksCUbgcIrUb+XFDCvQn298PUHCveiPlTZe5F3vA3smmHrEz1oQxV0xZJwQ3oB
7itRj5cl58JZ/j0Cv4ETeKtiS5PAlmzxthZ5K4t5LerrdxBvlyFvfQLeLhPw1os21GaIt35s
64Akhn5sa9OBvFWxpUlgS7Z4G0DeymIeQH1NB/F2NfJ2i4C3qwW89aMNgQzx1sS2bpTE0MS2
DjqQtyq2NAlsyRZvG5G3spg3or5BB/G2AXm7Q8DbBgFvTbShMUO8DWJbhyQxDGJbhx3IWxVb
mgS2ZIu3IeStLOYh1DfsIN7uRt6+IuDtbgFvg2hDKEO8DWNbRyQxDGNbRx3IWxVbmgS2ZIu3
EeStLOYR1DcdPZO1exSxOiCpQxSxanFgu6vY0iSwJRvtruoHq0Q/WJOinunM1zG/QJuk/4Ll
bxf4ZFTbL6ZYd0xQdzrfB5H9rYr2xzJgP183KNadyie1B21RsanQZpMMrswnlZvCJ5XL+aT2
2HxS7Sl8Urncs5ItPH5b4JP6k8AnZedosnnLdHwkzM/VJulXYPnbHegjiSnaEhPYkg0fCf0t
4OvoB/mrwEfCruVzHHgFdY2hrsstHhTBRssXuMGamxmEeZlPxNW7TyQn3T62FHEuk+RMKeLs
yUAfq1J3TFB3sj6mFPuYUgWbYr34RPagnq0KWJVhuen4RA6iXm8LfCJ/EvhE7G2Tjk+E+VPa
JOfnWf52B/pEYoq2xAS2ZGMMtgf1a1XAvAr1dYJPZBv2aVTZ9wU+EXatwNYHetCGKuwDbyNs
nQ7TiND/Zlj5cwU+YXs/qPJuyfxdbZLz+Cx/uwN9JzFFW2ICW7LF71rktyzmtaiv30H8Xob8
9gn4vUzAby/aUJtlfvuREwFJrP3ICdOB/FaxJSawJVv8DiC/ZTEPoL5O8LE8jXylfpRPBT4W
dm2wjd9+tCGAv/Nh3J5J3qJmwM1wE8xOyu1Mcd1EfjRK4m4iP4IO5LqKLTGBLdnieiNyXRbz
RtTXCX6ZHyN3qe/lI4Ffhl0bZOO6iTY09uD6TYTr0zvXduX2E8+DyI2QJOZB5EbYgTxXsSUm
sCVbPA8hz2UxD6G+YQf16buxT39FwPPdgj49iDaEbDyfA7NgrvXvnH7v08PIj4gk7mHkR9SB
XFexJSawJVtcjyDXZTGPoL5RB43P9xI5TGSfgOt7BePzMNoQwfE55fpMMmaZTf6lPXtvPE+X
31HkxAFJrKPIiRYH8lvFlpjAFif6uPagjyumqGd/j1n245jlgIDf+wVjlija0NytL59hcXuu
xfS+jVnSmW9mfpViQ87/w/IvNPru01LlwQKjZ9199emla/+CDNjP1w2Kdafy6bWjj07FpkKb
Tf3h02u3+fQWGnI+vdGY7xqjp09vrNHTp2fnaCZ9esxPSLGdIontSNTFaT69dL5/dluy4dOj
6/EKjITfjuJu9+mxa26OAxcQ9wWo631EloLP2s+W7gt0WYp+NS9D/Wop6lsmyZNSxNbzNfSr
9rqT9SvMplIFm2j51/dSbpkiVmVYbjp+vNGoP+1P5gn6k1JBf8Ljk44fj/kAqY1VkjZ6sE7v
AOg37LZkY5zZjr4sFcyrUF8n+PFWYj9GlR1q9PTjsWu5tn7Pgzaw9SJsnJlsLafK+xLzxVJM
ayUx9WLb+wcAj+22ZIvHtYqY16K+TvDX3Y+8pD45ule5T8DjZZif57EXbajleDzD9o6ULof9
iGdAEk8/trs5ADhstyVbHA4oYh5AfU0H9cWrsS/eIuDwakFf7EcbAhyH52awLzYR00ZJTE1s
++AA4LHdlmzxuFER80bUN+igvrgB++IdAh43CPpiE21o5Hg8K0N9cRDxDEniGcR2Dw8ADttt
yRaHQ4qYh1DfsIP64t3YF78i4PBuQV8cRBtCHIdnC/wK6fI4jJhGJDENY9tHBwCP7bZki8cR
RcwjqK8T/GRrkJfUF1Zo9PSTsWv2ea0w2hDBea0ZODKex3E4E3yOIrYHJLGNIgdaBgCf7bY4
0S/Wjr6kBYYz/GKsX96P/fIBAZ/3C/rlKNrQ3G1sMUeax6J1bfx8HNuXkeHKYuKxvGyubyWH
MVszy+6h+9NNtcps5XKJ48kkS3zbJNOJxrWxvsi96JFuXJv75yb22qNlUH6wcxbXhl7vmQZm
XBsnpJqammM0po2OHSonFCuKGY+hz+c7smPHjviJEyfi7e3tWiSEYkUxo9gxHCm2x48fj585
cyb+7rvvapEQihXFjI+/THlKMW5ubtaiIBQze1z18+fPx1taWrQoCMVM46hxdDqOhw4d0qIg
Gsf+w/HChQvx999/X4uCUMw0jhpHp+N4+PBhLQqicew/HC9evBg/cuSIFgWhmGkcNY5Ox/Ho
0aNaFETjqHH8JuB47NgxLQqicew/HC9duhQ/ffq0FgWhmGkcNY5Ox5H6ErXIi8ZR4/hNwPHs
2bNaFETj2H84fvnll/Fz585pURCKmcZR4+h0HFtbW7UoiMaxf3GMxWJaFETjqHF0Oo5fffVV
vK2tTYuCUMx4HOlvxU+dOmWNzzU+ckKxopjxv7Nftarmw127dsVPnjxpYayld6FYUcwodvwa
muXLlx+sr6/Xa4wkhWJFMdMr2DKbFhOZb60BTax7LsL1mQbuGckSWy9p/6y6J2WObU/KeyD1
npSi9b4juHWk/BpVurbyIQPXubLFmJgiWLErx5iwFKqInVXW3oR11pkPHgE/1Cjgtujb1fVv
td3tstYUzqquv90qYYW19hPgbldF0d2u+/4SzT04apd17l+7ct2L5Eg3+3gFEpt+0L9fR/Rt
HVrmDv+f3+X+3ALvNcMgx/M/rq5nmP4nKYOt556/+WVyteAOev8f8O/x/ER+z3fgR3Nv+F/0
dgsDJsuH03yvGRQpmo+e30f+dvCWT9wvjhxi5Sm5egi8s3RV/WNnT7/UQbCjNtG//+qqIfBM
c3AjvWflRgt+YEe+fRn2bgH2Ow2NfX9h7+bWXT/AfS+Gc+eLue+yG/fpZO3Gn9+B+9LSsrz3
VFTQ/Wro9/wt3Ft5CK6hHst9ZukKlArsSxqwX6HpSfi88/pkLq8BRsp2pjTydHTkejraiMBg
T8dQ8vki+wwJicepjO/4CzlC/FEil+CP8Yesvuw31jrv23LU9D9D7zG6OrM/wtNJ9C/oofMM
m/5TC/Pgg003w1HzVpg6Ig9uuDIf3tswGz7bvgg+2DyXXC+AN79bBFOGu+GdtdPhw0dvhcNb
58IfqqfA7397Dvz+L2D6VYPItWlwePNsiC4vgU8/eA/+/PqvwFdzHn73/Wvh4MqJ8NqSMXD2
k7/B8UPN8MMHPoenJ+bBCzMHw09nXQbPTMqHfa9/Bvf+4FPYF2mD0x9/BBX3/hXurDwEZYvf
htmL3oKpnjegeN4v4Jqbfg6F034Gw0pfAMOYzify3bhx3LhxN9IjyrRRo0ZNo0eUG/hEPk8l
+afSI8r1JP/19IhSyifyeQrJP4UeUSZOmjRpIjlORim6dsKE4pLrEol8NsaMHXvNP4wbN57c
N558vLJw5Mirrh41ajSpZ7RhDBk67PLLrxg+IpGMvPyCQYONy4zO5Mp1G91STrdP9u9DvtH9
ecSfT+a+j/zzK9WetSW410AFyO3DyvJXQt/3rC1XrLtcULeo3BIs7x4Fm8qwfJW9ZWX3gS2B
rj1kqyT18aCdTtsHtlzRlnKBLdnYV6UE9btHAfMq1Ncp+8BOxL1evwU994GdKNgHdiJiXQ5d
+8AuJuOS9TC7M5ZtX/ZtK8EyK0BuT1KWvxKctw9suaIt5QJbssXj/5+9b4+Pq7jvnbMvrV62
ZGzwC7O2jB/CWu97V8RYi7ENBoxtrOZ1aWPFXuMNwnYk8Y7EkgCBhBQsXRLSe9soLr0S3E+a
/NMEUin4fpoGbpveBIqTNCGtQ3tTSqDYOMmnTXLRnZnzmz2/PTvnaM5qLdbiHHm85zFnzvx+
v+88znd+Z+YQ4FhV54cgv7UwD2wv4JLN9bqVlM8DK675TTjuBhkOwXxXOo6jfE4bM5Znguc8
YGBQUbd5wMBQDeLZiSy7JLLMFp4HAc+qOh+E/A7VEJ7ZvK/bSPmcsOKaGc95kGEQ8NxN8XyU
pCzXrKsUz0OAgWFF3Q4BBkZqEM9OZNklkWW28DwMeFbV+TDkd6SG+hkF6Gc8KsFzQdLPGAIZ
hkv6GZmq9TNGwPZjijodAduP1yCOnciySyLLbOF4DHCsqvMxyO94DdXLj0M/40kJjh+X1Msj
IMOYqZ+RqXI/YxwwMKGo23HAwGQN4tmJLLsksswWnicAz6o6n4D8TtZQvfw0vOc9K8Hz05J6
eRxkmCi+x95Fexk9VVk3cTXohtn+eUWdToLtX6pBHDuRZZdEllqcH3Y1zA+7i9TG/LCiXn4O
cPy8BMfPSerlSZDhRaiXd9Ba+WaK4xSkrdpftuJK5wGvKnj3hby+ZzF23tY7kD/amwsNhAZy
/QP9oSMHQ1t6+nt6O/YO9B25taeXNPBVpG6k2bjeZ1iHqZ+lvjXXn+/LHQgd7Ontz4UO5Pv3
H7k913dXqK9nIBdat2d96Pae3ttyof4cTf9IKBqORCKXhmcweqqBlsUmZm8W29giQv66lZDQ
tp3bWexv03CHX1/NrGSEjJ5YSuXJaqRkvlu+veojhae8RZZTjOwEoZVkGlxN72ND42yVtcv5
GaYUL33ab/k+Ic9wyzCUmp/NkP++YtnYxGenbYDQiNBvtV0BY7qjPEdifHczPEejeX29mKbQ
mQchyQ95qkMydfExZQ8EPgzjW2hYm48tsbgAE1l8iiqtJD7HByAin8P3FLegfszu8fB7eEry
iF7ViD7ViH7ViAHViHWqEYOqEevLI24nW/26zu9pdv0p3M3d5srmMfV/ZrqJ2j9IpotFRr/4
xadgXvXT7PdE/D/furoGfi17AVA/MsnurSSw+5/i7aQPtVp2T1O/w+P4Dq/jO9xcublyc+Xm
ys2Vmys3V26u3Fy5uXqv5Koz+7OCzmjtI9drOsuH8yDYOcwnz8b7Wy2yk/hY8MaMmcTfdCxC
PHYDKf0ORazjZdYtHjPBnLt5nTGzDsT91VpnTPaNynTroonxCYEZ5iOM03XXS3PXS3u3Nne9
NHe9NHe9NHe9NDe466W563y5enTXS3ODu16au16au86Xq0dXN+56ae56ae56ae76VO46X64e
3fXS3HW+3ODq0V0vzV0vzV0vzQ3uOl+uHt310tz1qVw9unp010tz10tzg7temrvOl6tHd700
N7jrpbnrpbnrfLl6dPXorpfmrpfmrpfmBne9NHe9tPNhq9Z6aR7Tt8p4vTR2rZL10ljcStZL
Y/e566XN3ppdHqR7L3HXS5tN3eP1gtz10tz10tz10t7d9dK8xFgvzUPs10sjMNdAG1FbW0zE
F2t64TmwxXXznNUeIp+zWqRFHD5bI/brpbU5lKlNIpMsXQ3SW6WYrojfRuzXYTP3Mdh8EKM+
3e4bkRziuKVYl1Y2HwSraOV1iT4fBJ7MfK7PB7F///6hXC439bGPfWzqlltukQZ2fZr5HIY+
/vGP8/eDO++8sywcOXJkWrXR5w+x99x77rln6hOf+ERJ6O/vV1L74cOHh+6+++6pQqEwdd99
9xUDy4OqPmgehtj9Dz744NSnP/1pHoaGhhyZncowxO7/7Gc/O/XII49MfepTn3IMG5rvIXYv
e2/9zGc+UxHsHnjggaHHHnts6nOf+1zFsKXPHprJ/Wyj9w/NpTKD33HO2rzjlPaJK9maCOvM
svBu9rffv3hm/e2MNrP+Nm5HxbtmQKFd74K2Q2W9SBFfrHGI23WvRbvutWnXRQPk5NkaerZV
u+5EpjaJTFbt+l5og1XSFfHbiP3aml5Tu94N8edBvhYC94CftwDp4nrUFGM5dkMfv84hHroh
z4cUbdJNjDUCZ4qHbvh18mwNPdsKD05kapPIZIWHQ2C7Q4p4OATp5yvEQzfgYb8ED90SPGA5
GB5iFeAhD3keVLRJnhhr7M0UD3n4dfJsDT3bCg9OZGqTyGSFh0Gw3aAiHgYh/aEK8ZAHPNwp
wUNeggcsB8NDvAI8DEGehxVtMkSMtepmigfRQXLybA092woPTmRqk8hkhYdhsN2wIh6GIf2R
CvEwBHj4nAQPQxI8YDl2w7ufUzyMQJ7HFG0yQoy13maKhxExn6aDZ2vo2VZ4cCJTm0QmKzyM
ge3GFPEwBumPV4iHEcDDcQkeRiR4wHIwPCQrwMM45HlC0SbjxFgzbaZ4GBfvFw6eraFnW+HB
iUxtEpms8DABtptQxMMEpD9ZIR7GAQ/fkOBhXIIHLMduGAtziodJyPPzijaZhGe+VAU8TMKv
k2dr6NlWeHAiU5tEJqv8EqK+5h27/iKk/1KFeJgEPDwvwcOkBA9YDoaHNODBPM/uLtMcv5W8
m+6BNL4MeZxOHyL+cRgrmgl2Rh0+e1TybBVbqMj/JYfyj1ZBfvxs4vDZmg3G94AsTmRaaJJJ
Ra9irN9rM9bvRWP9e0xj/cdtxvrFGo8s3AHx2Hro803y3IWeLcqQGaO7wY/BZxqXPmszLu3y
ZdXly7ykZO1M2/oJrwu7B2zI6oj1ilheBLZvJ7W1LuyoQ1lGJbI4XW+1knVVH6LhwzRcRMMT
4NOD8yquNaAytxfyOgp53UfYWtl50k/2kyPkdu7VcRfp4uPsXlK6vqoffmVrYQdMuKm0jWsH
vW9WxFA76L3LAkNObO7k2aOSZ1vV8e1Qx7c7kGkU/LTs0t0M6arqajOk2+UAo7hub4e6vVNS
t7dL6nasH1y3y3xgrOqULrDJXkUZu+CZ3TVYpziRZVQiy2ysNb0H8vclBzrfC/ntJu/+WtPd
kB+W2Q8A7rAM4ppmqhO7QIa9xFhLwk8qWyN9D+Tjy4pcuIh/XDJuUAu4dSLLqESW2cLtIcCt
qs4PQX7zNYTb9wNucxLcvl+C226Q4VCVcJsHWw8q6jAPth6qQdw6kWVUIsts4XYQcKuq80HI
71AN4fYWwO3dEtzeIsFtHmQYrBJuh8DWw4o6HAJbj9Qgbp3IMiqRZbZwOwy4VdX5MOR3pIZw
WwDcPirBbUGC2yGQYbhKuB0BW48p6nAEbD1eg7h1IsuoRJbZwu0Y4FZV52OQ3/Eawu3jgNsn
Jbh9XILbEZBhrEq4HQdbTyjqcBxsPVmDuHUiy6hEltnC7QTgVlXnE5DfSvJpZfdJ0NXzinmY
BF29VIN2dyLLqESW2bC703GwPTAONuown5XwdWJc4G3F8QsR/6xkTMap/c44fPYZybMrKQ8y
+U87lP9MFeTHzyYOn203JnUcZHEi00KTTCp6FWNSPpsxKR8akzpuGpM6azMm5UNtpfjw+G8l
Y1J/IxmTMmPUiresZIxEjHO9rTiuIOKfrcExkjMOZTkjkWU2xkiYL+BfwDjIP0rGSMS1OoSB
JyGvZyCvN3EchMjtfCzwNs7N1ENcMSbinX5MxFNpHdsOet6siJl20HNXFepYJ88+I3m2VR3T
DnVMuwOZzkwzJnIc8nnaga42Q7qVjIm8APn6W8mYyN9IxkTMtqlkTESMp7ytyM+L+GdrcEzk
jENZzkhkmY0+2HHI32kHOt8L+a2FMZFPQJ3GMvsDyZiIuBY01YFdIMNeqAM3UbRGSJgG9hfl
8X2SMWFzPejk3VKMd72tyOOL+GdrcOzkjENZzkhkmS18HwJ8q+r8EOQ3X0P4fj/gOyfB9/sl
+O4GGQ7NMr7zgIlBRV3nARNDNYhvJ7KckcgyW/geBHyr6nwQ8lsLYywPAV7ZOMrPJWMs4lqD
Cd95kGEQ/HwEtmP0LSpK0iROkpbYrhbWhwAfw4p6HwJ8jNQg1p3IckYiy2xhfRiwrqrzYchv
LYzL3A/YZWMv/yQZlxHX6k1YHwIZhsuwHqdYjxS/7fKdI5yPADbGFHU+AtgYr0GcO5HljESW
2cL5GOBcVedjkN/xGqrTH4c6/UkJzh+X1OkjIMOYCecpkiAZ/n/qnNfp44CPCUW9jwM+JmsQ
605kOSORZbawPgFYV9X5BOR3sob650/T8CManpVg/WlJ/3wcZJiA/jnDeoz2WZL0f1azT4fz
SvE9CZh4XlHXk4CJl2oQ305kOSORpRbHuI7DGNcZh/k8132W56DP8rwE389J+iyTIMOLJXV5
lGM7w5E+sz5LJXyzGFdp09TGf0T8rdrMx7Sc4mCLVv7smY7pVSr/lirIj59NHD7bbkzvLIzR
OZFpoUmmczGmd9Y0prdVUxvTWwLxlmvlY3rLtPIxPTNGqzmmJ8YJmW7XK+p2EeSl1sb0Kil/
ZllmY0yPfY8X1PRxO6Z385ieuOZHGPgV6H0L5PWDNOwkOT6fLZsXqNGmXg1UqV5th/xuVsRJ
O+i2612oV83PtqpXhEztDmRi6V82TbqbHepqM6RbyTjeEsg/q086JfVJu6Q+wfqpZBxPjAEy
GfcqytgFz+yeA/WGWZbZ6GeehbEsJzrfC/mthXG8A1CPscw2a+XjeOKaz1TvdYEM4nsR0c+0
+pbTyfuSGItlOj2kqNNusH1+DuDYLMts4fiQQ50fgvzWwnjdPsAlG5Njc5XnJDh+P8THOO4G
GQ4hHEdN70iVYjgP+hxU1Gce7D40BzBslmW2MDzoUOeDkN+hGqqLb4G6+G4Jhm+R1MV5kGEQ
YThTxbp4CHQ6rKjTIbD9yBzAsVmW2cLxsEOdD0N+R2qoLi5AXfyoBMcFSV08BDIMIxwnqlQX
j4A+xxT1OQJ2H58DGDbLMlsYHnOo8zHI73gN1cWPQ138pATDj0vq4hGQYQxhOCkZV6gUx+Og
0wlFnY6D7SfnAI7NsswWjicc6nwC8lsL42S9gEs2FrZQKx8nE9fMvNY4yDABvFYUesadCMPV
wPMk6PZ5Rd1OAgZemgN4NstSi+NiZ2EsaYtWG+Niol5+Durl5yV4fk5SL0+CDC+W9C1SyjiW
fdeG+TgxL6PQq1gTT8QVXN8BpGPxzay4h81Pt4GneRrFkq8nY7Vh21jlia1rwwvyNPmodF2b
fRl9rj2WBsOH2Bfr2rDr5dvcXNemFraDBw/+lK1p464dqhaYrpjOsA5zudyPH3300al/+Zd/
mTp79qwbFALTFdMZ053QI9Ptq6++OvXGG29Mfe9733ODQmC6YjrD6y8znDIdv/jii25wEJjO
zOuq//KXv5x66aWX3OAgMJ25enT1WOt6fPnll93gILh6PHd6/NWvfjX1gx/8wA0OAtOZq0dX
j7Wuxx/96EducBBcPZ47Pf7617+e+vGPf+wGB4HpzNWjq8da1+NPfvITNzgIrh5dPZ4Pevzp
T3/qBgfB1eO50+NvfvObqV/84hducBCYzlw9unqsdT2ysUQ3qAdXj64ezwc9vvnmm25wEFw9
njs9/va3v51666233OAgMJ25enT1WOt6PH36tBscBFeP51aPZ86ccYOD4OrR1WOt6/F3v/vd
1Ntvv+0GB4HpDOuR+Yq//vrrvH/u6kctMF0xnWE/+5tvPvjKsWPHpl577TWuYzdMH5iumM6Y
7vA3NDfddNMLd9xxh/uNkWJgumI6c79gq+52HQ1Z/g2o/t1zCL7P1GDOSLGJ7yXNx07npPSY
5qS8gdjPSSn73ncB+o4Uf6PKvq08qsF3ruJjTNgm4MFej7ZqJ9lL5dzL5ybs53s50kfy5KAD
vW27av8dJ97e4eXfFCb233ElT6GHf/tJyA7v7tAO7wdPTvpeWHyM7+cPHzjyBP1lk308SfRJ
P9j5S2l+Tzdv9o//72/5/owr76uaRn9/ef/+O4ROv0vTEN9zZ+/6Mr0a3M7u/zacn6rT43fd
SG7NdPwPdjvXgQg3tbJ4X9WYplg8tv9Beu6Fy//Z/8SiJh5n9UVN5O923nzHfW/+4kvvUN0x
mdj5r13YRB5+ceR2ds+B27n6ifjF9hW690t0/5jm6v5c6d6Pvrv+KCoXrWj/OlSW/TBPp7Ab
3t8O89KytLpv2L2bzVfDyvkJmFu5Cb6hXoaOxdYCYTfUJQWoV9j2IPn34vV1KK5GNFs7Mxh1
vfOOr+udt2kgDV3vNNPjX4tjooepKRYueeck/SVT99LwG/KdqaO8Lvsm/857k8dZ/t9g92hG
ZfYd8pBF/oNleY6a8r9hYYD88M40+cnQ+8iGBQHScUEd+fvbkuRfH9lGfnhXhl4Pkmd+L0TW
t/rJ3x2OkFfufR/50T0Z8u3968n/+su3SD7/nyRyYT29FiY/uitJJm9aTX7+w78n/+cvvkZy
B39JvvXhleSFA2vIV69fSt7851Pk1ZdfJB/56L+Th9YEyBdiDeSPEo3k4bV15Nm/+Ffygd//
OXl24m3yi5/9E9n9gX8kV+95mWy+7m9JctsJsqHrG6St8ytkefzPyMLwH5N57V8gmhbBGy0b
G1esWLGR/UIIL168OMx+IXTgjR5voPE3sF8Il9H4l7FfCO14o8frafz17BfCmrVr166hv+sg
hFauWtW2+lJ9o8fa0mXLll+8YsUl9L5L6OEFCxctuvCixYuX0Ocs0bSm5nnz57e0LtA3LVAX
rG/QGrXi5vX5tZLNU3JkLg91Wml7hPfXofKI2y+7OWtXw1wDu4naPKwi/h4y8zlrdzl89i7J
s2Xprob0bnAg02ZI38ncsqrzwK4mxhyyexXz0wVy1to8sLscyrJLIstszKuyGvJ3gwOd74X8
1so8sGtgrtcrSPk8sGsk88CuAV3vIsY8sNfRfskASRbXsp3JvG2rIc3dRG1OUhF/D6m9eWB3
OZRll0SW2cLxIcCxqs4PQX5rYR7YXsAlm+t1KymfB1Zc85tw3A0yHIL5rnQcR/mcNmYszwTP
ecDAoKJu84CBoRrEsxNZdklkmS08DwKeVXU+CPkdqiE8s3lft5HyOWHFNTOe8yDDIOC5m+L5
KElZrllXKZ6HAAPDirodAgyM1CCenciySyLLbOF5GPCsqvNhyO9IDfUzCtDPeFSC54KknzEE
MgyX9DMyVetnjIDtxxR1OgK2H69BHDuRZZdEltnC8RjgWFXnY5Df8Rqqlx+HfsaTEhw/LqmX
R0CGMVM/I1PlfsY4YGBCUbfjgIHJGsSzE1l2SWSZLTxPAJ5VdT4B+Z2soXr5aXjPe1aC56cl
9fI4yDBRfI+9i/YyeqqybuJq0A2z/fOKOp0E279Ugzh2IssuiSy1OD/sapgfdhepjflhRb38
HOD4eQmOn5PUy5Mgw4tQL++gtfLNFMcpSFu1v2zFlc4DXlXw7gt5fc9i7LytdyB/tDcXGggN
5PoH+kNHDoa29PT39HbsHeg7cmtPL2ngq0jdSLNxvc+wDlM/S31rrj/flzsQOtjT258LHcj3
7z9ye67vrlBfz0AutG7P+tDtPb235UL9OZr+kVA0HIlELg3PYPRUAy2LTczeLLaxRYT8dSsh
oW07t7PY36bhDr++mlnJCBk9sZTKk9VIyXy3fHvVRwpPeYsspxjZCUIryTS4mt7HhsbZKmuX
8zNLKJK99Gm/5Roi5BluGYZS87MZ8t/HU9MgxU18htoGCI2oBFhtV5ClPPUrUdyr0P4ouQae
7gEs2qUm7hRWM1/fDDJoVA+vF/Mq7OFBKPWDvHVIX118vFrkhQ/x+BYaSOLjViwuQFAWnyJW
K4nPsQdoy+fwPcUtqB+zezz8Hp6SPKJXNaJPNaJfNWJANWKdasSgasT68ojbyVa/rvN7ml1f
DXdzt7myeUx9q5luovYPkulikdEvfvEpmLP9NPs9Ef/Pt66ugV/LHgbUj0yyeysJ7P7PFzy8
3/AFcgz6DwehnbyA1rBNdCev6S0zfvLS2epTPVFYwAVkLiEp4hEuN7RxT1WaheZwscM/AlP4
O8hP9lnGvJFns/9WdKMRnbTPZ79YTPkpnrIPdQbsjKh+h8fxHV7Hd7i5cnPl5srNlZsrN1du
rtxcublyc/VeydXPssGCnkI9f7Xanr85ujd6lYReJpKUcUqzTTm/21sjiYDqG+BFMgQauQ3C
WTfUdFgNhPhZiXVZWVgHBTL05bpiKWPn054gechTX6TC2bl/oOfavfUlZUwzlRC2/4dFlOxB
ZHoIxfByNC1G9+2BwEpe9l5xVZNc3Ve86pFcPUqvNvOPUnCOsn36xxrsg5t9ffogIZPoaJ8+
5ME2/S48qJDtR3f1o7v6zXd5oN4Qz1oLKVk9a35hk0lvosbJIV6caMZnPV6T7ep13bSgEZ5H
uVKEesUYZnHUCdQ1XKQzvk6OwigJrvo0NJriget+SHMeMfw0FsB5Fi6Ccywvy+BcHZjcD+Jf
Cvvzs7rwxEZ4De4JIXlKhWdXr7/t1vzhnl5FHdQVdaAV8+CZcR7ESGXlefA5zINWkgf2VD5m
qpgDf0kOHgYNGBRXEJpKL017nqHjDv0Z8gazmHOFHFeCmPOpunUbzPdSg4n5+q1akDyu1Rcb
EHbu5/Rc2lPeYC42dW31BnMxNGPiY8R3o8G8sKIGc4njpm+xqe7w2jR9i500fYvPg6bvQhvh
zRXo4gqavsUKzc4Sh3lw1uwsrrDZ8dG02YeHMtegkqbocuGwoTdJr3n1UNwKhmjTSfPea5Ka
UO/cKnzE5truae51Q3WDaJL2OGiSmI2H6P/fo9W07BzmYsTgL05Tb5LY2Q4Uq8k0kG/fJDUX
ry6D+7P3Gvc3F0vicsurDLgXW15lGF5heZWV5Ussr+LpT8qvsjpgpeVVZotVkqt6zbrUxHT5
YPh9vWiAUdO2tFijigBNW1/xtNETKFzD9tfy2m20uB/S9H0W54RmxMl6jPOnPMb5fV7jXuIz
9kfpfithZBWrgK/rG0jSEE109x1Nxelehh1lrr8r1bNj4Oae1Laj+3tuvbpnoCd+soJ7jIZi
KWoo2sua63XFRtpH//x0308bYh9tgP20uvZRWPmpfH5aLfvf5SZ9GTIkNvpK1Bu0NjrrGwmP
wru6ysyvd50KV4v9AtonWqHoTnIxEv5idG8BxVmB0/SgNOl+K28hmNj6HA0nubNuS/HYyKLc
gAFoY2QG1Pifh4aLIXfMYXUFV5VGValRA15PSh1WNVPAbpl+1J2uQ8YOwjUNGWe5hXFWKRmH
Xd2tE7tllgEiY4fYL8D+tTz7Ib7PHFxHtZbifsTTUoxzwhMq3rvPS4pxTnmNOEd9oR2t5Peg
bt0UijBWOSp+2f+xVCKajtO9WDwdj3aynUQ8kkmya9FkJNIZi4Sj0XQUzsQ6O/lOKpZMpqIn
yU1E9/yuetKgNTlY9pR0TEvBEuR/LRRMS+mZNho20P0UPbeZ7l9N98tLexABIAiGbQFAimeL
74zaUE0gPIoZ8FJwL8vXZojDjq+GOAJQF1sAqk0JUOxJO3M9h6O29XxIL+jFfaKh82ifeNB5
tE+86Ly3UFLnt/LGiNVhzKDUgolIuDNNDR5NhhOZCA3JcKozHc4korFwKm1U8UrRuWxyo19a
8i5QXsX7qOp8hE2U1ELDQhoW07CchtC0VbwPKd9XfGU2rrWgpmAhquJFX6GOGJObBVF1L4y+
wsLoqx0ZPabcuId4424YcRTth5ChR1HjHkKN+wmvkc4+X4Ea/TK40hlOd1LrpWPpcCoVCyfT
sXA8mQ53ZqLRcDTFbRgPpzIn+fv9BvUbuHxyw6+dxvCsbffRDqOPtNKwiIYl9NwKGtrovnrb
LgzfjAzfiuItQoZfgtr2Fahtb4M4wvCXWBj+Ugdt+8GDub7c4f3lLQgvkmBxVspGyQmjq4a6
dtMVc44cZP2QD3ULufVFGe6g1kx3UHMmMx0pXm6T8Xg4Gu+gOx20QKc7EuFMPBPu7DzJP85M
OLrHENW6k2fVR/DTvwBVmN9U+v20G+Una6RA8KP+QAAM0oj6By0ICAsREBYjICxHQFiJgLDG
BISQBRDWKAGBwXDvNsZkHLCGg1WHIskhcOoasX8K9lmcU5oRf5/HiH/Cb8TZ7TXOj9adonBg
3+hs5VV6LE3bb1qNp2izHc2wQesEK+XRaGcsFQlnMulkhlq+M9UZicRj4XQixboGqUgkE0lG
w2naBaB9CH2mheqkZlaSHEhbwbh2/Yc62pevo2U7SE0UpAWgjsofJFfQX/X+Qx08+yLU0VyB
OpprYD8ABVh8J5dEaV0B5wSQVloAaa1yh3SAuRzkj5Thh+OEIJzAPm8QoDpJcpwYcbJeYz/k
M/aJH6WD9k8EGH7EfEnxZDiWSGWi6XAiGUvSyiHZGQ8nk/EorSCStPuYSIfT8c5O2lLQ/zoz
mXAkTm1Mb0p2phMnizCcUTKgDTlQrrDpaNbxv3nUkBfQ36U0rKRhHQ0baUhJgVKH3jrqwGDz
UI1zAQLKUtgXEzfWAVDWofs3EuOTtZQJKKssgLJOCSgsNwcOlmFEp36z14j9E2i/oBn7WY+x
T7woPtov+FB8P4ofyFKMXAJvxolwxOrfSa6Xi+0jHTgoN+0yUIPMtF7+F+AjmV6qJC+ZT8MC
GhbRsJiGctNihwYvMb6gFMf1xPjaUJCovIsI+wFgErxgxkWwH4QGx8tN+zC8xJbT36wXFFai
v/H3hxYUuGmMqdpyZK85fwjU6Snwjzigv91Q2xQ43li796Bp5lnzOUEvtZkqeZ0CbwMKnCAS
vRIKfLUtBX6pLQX+aVsK/CFbCvxhWwr8M7YU+GctSe42E03nh4apXUJyi7gBCEWS+4bi6ZmS
3Gt5l5gRGyHozxfJaM46Mw6as9JAWavEMpqcNtTkLC8jqZcXWUsZSe2X8JozIaYxI7Ha1DsQ
Rlgh6R2UG6GU1yy1xUf40e4dYv/7sI+5zGs5lxkq7n8f7R/1Ms6STdvGuonxcCaVSicSuY5I
JJUKx2OZaDLKDkpJQ8EnItaxyFEyFV5TjaTKOEls3CvLuoqGcZv5n85HNtAaoYGkOQ9pNm4z
qLAZggdxj+J5DWDcDthnhkubOMZLLYx7iZJxMcdoXcyccoy8WPJidjH08wQhyMi/CCcDO9PA
Ga4CJFpGMfGE2BBLyuii0lJm5gmnK2VOuUFcyj5taiaEIb7hyBCxGdd3IV7fGfsnPIzVWQHw
KlJ0XLWMm2NcnU7jtQFsrOOYmDtsiqXTmAJXeD5yISdpZlrhiXgXmgiYhyxM8YySKcqYuFJ7
OGXiRGEocrJeZg/xNoMZM8aNcaaMUWc6sSaoWNtoMi4Nm+biMi7NMI2ZS/PTMiUzjVP+TLRF
S0ymedjCNM8qmcaCGys1kBU3tkl/rnFeQ5wZ4jNO+RhvEQPzmpkqQUIJbgqYqyLDtQXGhJzd
Z81lYUOGy7gsw5CCywrSO4MUaHUUN3USQ1rxV0Hk9iSqvxCiJdaaKIfPWBjym8qdCoObKrWf
FTfFOSXN2B/1nCqjtAU31crHI9aVEUbABwFJxOmjIsUUB5JF9Y4yNgmbap1NF0GwSXX0hbkO
eGuZqawYJEE1LkIM0nJU5laaTPVZC1P9pZKpiuxQqZWqwQ618pp7gZTUOcnVulB6DfM8WOkL
yngeQ+lynqdc6TPlduzcFgP07hbja4AO4Z45jb98Bbk4n1iXypgZ11/e9Zc3l9kOqb98Rw34
y19Wkb/8BgcfmOlVfYep7gjY+Mt3OPGX7zgP/OUvsxHe7N3dUYG/fIeCv/yGGefB/lMx+zxY
Nz113DlKPmRgao5m4DNvlsj1mXd95ufOgIGg9BlHUue7hHzAF5KeMw8YbJT6zG+E8tKEQiUD
BhHbAYOo7YBBzHbAIG47YJCwHTBI2g4YpGx95tOWwwkbTQ18HbzJbJYMJ2x8r/vMb5wjPvMR
9EqKjZ6SvL5udOIzL7bFJv95cR5/+2bexz724vxSnI6GfOY15jMvSBXdY34BKMnKXx4bz2fp
C7cY6pklkKsl4EGvT7yscd/5r/OS6kOdWA3xeRriFjREA2G/+KiFAdJKBlD1i7+Wa9Pwcw9p
xHYs6So+lmT4y+8DX3h272kvsfCLZ87ImXhEH/OJpTOJeIQNFUWjKXomGknyE5FIKp5IpNJ6
pBgfIYrFE9FIDPu8RzNsJMnwi6960mVjUBsd+MU3UIgF0ThUPS0v9aSLnpveL74BDLsAAcLs
Fy/GozrgvKjW6yFfXYhjNPvFxywAlVEC1LvnF8/PcyfZddB1mM7RPRmOU4R0wGddKrFNo13Y
5Ktn4BXvexe84jHvH7cweacjk9t7xfM6GqhH3jSj8yc8WeWmnHvCe9G9dYyqXAN+drwwh+k/
5p9KTZmMscNOuk/LeTQdZdSlGLaZPq5pRA2be9U05vZSJfpoA+M1tds+2hn1TmNuLzKDOG5E
nOI8ZO4FaNjnImTuZcjclxTZT93cCQtzX+6gzbZ0flYp5phu5rZFNt+HbK5czFm9TC0YTXWG
04lwZ4qNyDG/0ng6nKInWDE3hoymjy0bszOX9QaFss5obB+5gBpo5mVdGH8+Mv4FyPiqZT1p
Yfz3KRlfyf/9Kn5kNP6PkZayjgP2WWbnW5DPewj5KZOAEeeol5R0Ilr5OulX60aNJNPpeBLt
ZDoj8WgmRmt0amhaqdN2PdEZDcc743FathOpZIoW8xit85lnSTKTpE3/SfJfaGIfqF6C1iOH
GE5X23jB1/M/vbfAHJuDtK2qo73uOtrBC/IeQzmchB2E2WS9BVG3rERe8OuRc3MEDW2lUW9B
9BwEnFIWcNqk3P1U8YIP8wbjRBEJ30dfVIwiL/gC8oLfh0aNswhRoQBCF/+K4iqQKxpOx2OR
ZCrcGcuwrkCadgSiCdoudEbZsGM805mh11KZdCIeTqYy8SStMDqTzAkjnk6l6Ash69Fun3lC
ZWOXGCxd03jCB0gzVas+dllHO4N19PWyjr4l1NEO3HSe8MKIzQgs5nFMMeTchu5pR2CJIk/4
jGmsM20BliuUwDInPeE3zmFP+CB9QkSR1nZ94V1feJfarq4vfEbqC5+pki98py21fbkttf1J
W2r7U7bU9v221PYDttT2g5bkdcZUuwShaeqSkNcZ1G33YfI6VdKbx76InGhG34Rn0RsP+6Sv
lb+8sf68QRYz/pjTyiftLhpNSQY1JReUUcqCF9C9Cv204vDxb+YMBlLmTSjo4wb0NjLPRAF3
mlp1obq4pFUvV10pA1mqQezBzr3TicEuHkWsI/EwFlHQ8bFwhnbYExnuXm4QdpjUAwrwJO8E
Rh3dU8b7ZUxMfp2F2pnneQO1ZD0FQINE7djnXHB8F6G2LWTi6S63UHtCSe2YpytVuhOerrU4
uYxgyHTncIbZJdDOmq+YODSsvpYyUsVQXymHVq4+Vb5MqO+TqLLE6ht1pL6Yrfow58W/boEa
QHRBW3k5na/T04xwAgIqavjXmS6YGCmsvPnTKI8xUn7ec7RXHmaf/CYCQijvUxbK+7KS8soY
JDUA8voUDfqNcgAugskhBHfDyRxG8Jws9tfLLsn4HazK1jJ+pxyHfj7RhToO/aZJLYQq77dQ
5XElVVrwMaUKVZmPQFSprbxnEtJ9pEu4DGA6ioTISS56RCGmNQuClR4qY0EMpeO5AOolSlf5
7r8eKf0BC6X/qXKTZbAWpbpW8Y/mHyZ4TqA3ytL3f+AGdPrgZJHbtolUxhhkTK+VVo0S9nYO
SBSr4uUcQIp90EKxTyoptviGX6pTJ2/4rdzuTaYXcGNI1+o9HCusqew93FBY6Xt4ucJU37nt
3MHqYd7u6dZRFjqazg+Zvdn63gPvVK4f8nttoQsNbP2Qp4H8g6dRes5cMrdI/ZC3kHd/oYsr
idMlK0TL7Wze7i0mN9h6Gz/kLU78kLecB37IV9oIb/aY3VKBD/AWBT/kqxzmwdm83eYcqM7b
3WAzb3dJUzQDH2SzNK4PsuuDPHeI2iCcZ13Qv/K0kIXeVuk5M1G7VeqDvBWI2iDqN1dC1G6z
JWq32xK1V9sStdfYErU7bInaa22J2utsfZCvt6Rxt5q64g3w/rFXQuNufa/7IG+dIz7I21Bj
go1+neSlc6sTH2SVebuxHzGek1soYiVSykrsm4zm7SZe5oPcCKK2i4m7BbXVbj1zNzZhHVGZ
uZt5HbPZulcSMU+mRpXNPJE/CGmYayfZzN14WSgfMncdGj8Iog+Sham2W5jqeiVTVXMWb+yt
zF1KPIZH827krXwKeSvv497K3dAKy6fajoLTUCwejeguxYlMinkUxpLJGPc/jkZimViyxKM4
EUlGo4b3UbVTLhuzwLDZTdTn8Ga+ykGSpPub6e/2qszhjX2VBWSSyFd5M0pru2kM5GoLOO1U
gpOar/L56rgalZv7fHZcvcbC3Dc4Mvd5Mnt3Msy+X3Aweze7wTQ+hA1/Ps/evcPC8LsctPAz
mr2bx0Hz1I2iAp5Fs3efQNbfhzp4xM86eFGo5thAVIZNGJSKdaTCmWRHjBbbjmg4E4+FY1F2
gR5RI3ckOAbeB65zjm6TjXFhOHQQtTm8/dRgflpp+wAKfhrPX+Ec3n4w6yLU4VuK4LACwaEN
wWGdqcN3rQUcdivBoWpzeHOfZDRn0Wnk23wKeZ/K5vDmXQ7uw7wDerD6nEQxmJMokaTVOG3z
aUMfjybiaXo6nowm0vEoLf/JBK0C4olYmtb5yVQyw7oDSdotYH7uH6JJ/V61krMeucNQ2kbU
ZvEO0go9yGc+MmbxDlY4i7cY2r8EDa+uRS6pdrN4Y//l6yygtEe5Q+p0Fu8w7yucMHyWkf/y
PuS/nPUZ8UP+E4qzeHfS/l46TEM6xZqEVCrcGYklY/RKJMUmtIrHUp2pBDVzOhaLhSOdMdqI
ZGi8ZOks3hUnUzYSiYGiMot3gCykv8toWEXDenrsfBZvMQi2EPVFlqG3k1UIKOvhd7pZvK+3
AMqNSkCZk77LW+ew73KjzSzepWS467nsei67hHh1PZd3Sj2Xd1bJc/kGW0J8ly0hPmhLiA/Z
EuL32hLiBVtC/D5LynunqdZshIapW0J570Q6rcOU94dL2lMVyhsvRsLfb9E78Cn0psQmf2zl
lO1KoKk5Fc25as5HM65akNbRzEn1qEZDtBM1RCvLiOxQkdfERDZbLcTH5/Zezt9nzOynCoEt
3mcuQPEuQu9Ay03vLTeY+hDCVNdI+hDlpiplP0stZjXX90c4a2F4UB9F8zO0oPUJR73GvN9Z
znLeCPmNhzMJ5m/GPaNj4UQmkdJn7k6mwrF4MpFBM3dzsrGEojRYS52sNN5PqptuGcOJIXFD
WbfTgISYEbyZgrWBvqDXk8vp71bObJohYTUreDM8cy1ylI8iuFxOjNUJt5oYzF0WkNihBAnM
YFoXYexEy3uEqDd5Au0X0CfZZnqrZLZwRjem2ZqRVP+MgGQ8ZDJWMlu4PIqJl8RGKp8tvLTc
Mp9bL/CS3iJFZV9usf+t14KPFB2uVsRDLDLRT4OoecJG+kNHRopVVM9iapmzTabZwzEL1Vq0
AKcLGSnIOUPGDDLOUOcOmevuWmBY7OOZ2ERsrhXTmKt8RvGl05qrklnFA4hCEuYasjDXo0rm
KmMLS21m9VVPmH/Vc8KWLeRDA4ghPMXbRjGPAdB7jMDTOT5G4+kcH2f7GNFnzGOgElvGAe60
ncfAMKL4SiiAOEA/fY2UtZVWXwwFFLg/0VZeYmor77Uw4mNKRrTg+EpN6XQu8k36C9wO89pq
nPvzMC5PMLUG+Sb4NJ2EE7yaYOEMUo6TcSfRhAYVJWDN12Gzp8v4OsPs5pnKg7CQWlBidqez
lQuebh2iXzaa+LiChdmPKXeRDD6u1NpOZy7H8wmEOZ1vcHBshorW4vcPQJgBEQa8GfBhQJzp
LBrQZwaj7/TOMnYNmzVi080xz2rOZgYI8Kkkys3qdGZzPCNAALFqmD27z8Ksw0pmLbJnpRat
NnvWWvxmzYIfWwb9+2mZMWyWRWXMmGEWa2as3CzVZMTkbqBXcuariWwpLlnYUDRFC//dqLXw
QRa9HFzFW2GNp5qk18SbKesRb4V0A2QbLzFbc/35vtyB0MGe3v4craHAlYXhORdat2e93n8P
9ecGQgNHQqzXGLk0fCVkqbn2sjSvlrK0oOBB/snb8zdH90avsvhgJGjy8ElWCKG5MIn9BbzO
7As80nB386b5osiupn2sBfwjnOWkyae3+QfAg4op5094xS8qod+nCr0tSIpeVmLb+M3Xjn82
vCVr0FoaWVhsMgnvwq4BXepPZu7+PrTvQfuj5BAUeS8ivd6Zkm8+03VMkk2ZUpZtxziQvSb/
r0XFswTl5SLRjULb6qz+e7pL/12FjoN1WFPMJ62YQvZnd9/P7gg98ItwtjTFBDr+GthErwx9
3EOlPA8fKk3hxEfLUvDyFAKE+e3+Ga+UPcR+q2asrxSaTL7wT3FHD/xB13TbuNKT1NJtcJQu
i/2VbKkMmvKzNEfPUk+30VG6jRIZPMrP8jh6lnq6TY7SbTLJoM0BLGlzAEvaHMCSZw5gyTMH
sOQ5b7F0aeFudM7oDdyz8M+v/tndA12s2xqsM6TW9R8hvWX3GL8e9FzsMECm9qBBSX3/juIC
nWs5MpaRY9B/0Y//mR9rxeOnNXbsKR73eY7xFzRxfLn3GO9xiGOPjx37i8d/w48DxeNj/mPc
n1YcfyjAjlkf8AHum2LemGYeBPk+Db8Pwe+loE3Nsp+ja/PDNtpcnS23v6cM+dNrU557lpPp
cu85r3Nv9ulIZFv5dqzL6FVa5X5htrz+0OSFxzL3xDL3LCfT5d5n20P+ms+Z7o0e/Mxzr6J7
/3md+wCRv42cUEDODkvcVwE5PCfT5b6uqrp3XmpnpvvgeZr7xYUmNPDM2wferjagvk4b52Ma
yvpAK4GKAvIGtlBhBb/+jP939X/S/ELLK/5Qw93NT7boDMiVNOZp8pMiR8F6A3o6LWy/2DtY
SO4scbQxb/eDBPJ+hXia7M5QVs9hPckH7mq8oHnf/M8F/rjxraZN828LPNBY19w9X6PWKc3h
usJjJa5D+ndu+sH/lfdmsj+7+78WeQbmCWLUjKOjT5ZFr+cDIquppg8QNi+Tt6QuYos5lNfj
64tp/nfyFTBCUQseg8EhxJiVb5pNKwGdWMpXtvlt7hYUTz0at2kwxV2XjfD0bwn8hycKzaY2
I6MTm86lYfQfBB5uvI8a/TeBrzT+fvOm+a8GHm+8zcbo4lPGUqPfKTf6ie9+18MK876DB5nR
NVNzyAyPjV/PYa8bXQOja6iIVcPolh2ASoyuKRpd1BBWRv+HwCtEN/ofkes8597oXwqsabqW
Gv2vAtc2raFG/5+BWNNmG6N74DvWUqN/1bKkc0aR/LBtPTW6BxldZKxQKEhLunaOSro27Xux
A6N7qlTSjwcawej7aTjXRveQ7we765c37m74ZfDO+v9o2NDQVP9Y/amGhTR7MW+p0VeVvHiS
YtPWUvKUhZB7Trzz/D00pUv2EI31cZ6iWPXissKCYhewjg0awraBd3Ng8KSDq1wrtvXzioxz
GDLExgQC5Bb6/2XZmSiMpcmEt1dYqn6g5esNf9D64fonWoYbLm/tq/9ay90Nq1qrp7DDmq6w
wzQhmcL08Y9AicJYr/aD3fmB3pxZX00z11fIWl9Mdnt9tfhfYK4r8xP+Nxpe8b8y73q/r/Hb
/m9TM0a0mejrfq/Q140AsD+wAJgHRnyKEzxSaZiObr3xhitDfbnenoH87blQb+72XG9/B6xO
5i3TXoA/8VxgTk/ZToffmtfU9Nj8ieZX50Waeuc/0fybedc0dc8vNM8Uc480CB1+k+g6ZMvS
y3TotSikH4oC6KzVxh5Sqdp8ITu1PWILvSD5f/7F81nnemVg03y9c81+Wefa3KDpnff6kpqb
HbWD8crVOtOON8uJfe7Zq8F/C+ybz14N7qDxWWed/Xoc5t5b5dyLnNjlvokcbz7UcG3LjY3f
aX6kYU1LuPFb855smNdyIX23C/kqg+xGyFWkWF0aFacOUp8AaaEUpLCyQQdvOwy+oYnXiS3g
0nELqxHIdeQwS04JnEHLhlcXdjoFfaJxa8vBpu80jzaGWrY0fWveM43BlvammSrIAwrySBQU
sFCQWAJiFhXEhJ1OQW83vD7/FYqgCxu/M/8ZiqBw45/PH50xgrygIJ9EQXVcen+JgljHU//O
bBbVw0SVq2dxtsB9TB7S7tOnpNnS27P/llDP4QOhDxzKD+Ro59cH5f+TJBQwep9SlkphGAkT
Duy9jHXTX375ZbJv3z5+zH5fe+214jvb+RJnLm6ufdzN3dzNyfZGQXz58SbJeg2+g70ATLnq
cTd3c7S9SVp8pczh1Bxsnd04bhw3jnoco231oLbV1ZQbx41TSSnyuqXIjePGmWEp8rnvee7m
bhW+54lS5HdLkbu52wxLUcAtRe7mbjMsRXVuKXI3d6toeyNbyH6q6BHyeZjK4wt8xiO23Qy/
vbTDt5yWtxZNn11QbKzsMT+4RCjX13ekL/TRnr7+UE9fLrS/N3/0aO5AqGcgNHAoF+q5M98f
6s3fmh+wyIiKM/ET3GGFzZKhkXb0PdwGvoCUehYMD5ZDZBN3zeulzx/hnilOtieyzxbY77PZ
fyvOH/QYbdOXUn1+PmtMbvOn3PXZGB55sjihK/qGlGepvuRq0NALv8qOF2QzxflWmLvM7r4j
H8vtHwjlDx88EopKpl3BU3CIRRF/+KfLr1T9nLr6239oxYn3xDRFlzxw2Wxl6DIAkRl2l2Vv
5S6yLBvFT86yr39Pm/cD7TDX/7Y7j+b68rfmDg+EtvYM5MgR/tlWpHNjJLGRLYFEDnNvKRRt
x1Yaidv8MAfIDUcGch89cuSWkgtBw4rGyeaShHJ9xpV6PfrAkf1Heo2z/AeOPsOn1oOROPYB
Qtffffe7m2W6MCCayXoLWVI6UUslm5b9/wAAAP//AwDCsPgw</Template></GraphPadPrismFile>
