# Supplementary material for: Regulation of stem/progenitor cell maintenance by BMP5 in prostate homeostasis and cancer initiation
Source: eLife journal article supplement (doi:10.7554/elife.54542), 2020-09-07
Supplement: fig1-figsupp2-data1 [file elife-54542-fig1-figsupp2-data1-v2.pzfx]

<?xml version="1.0" encoding="UTF-8"?>
<GraphPadPrismFile xmlns="http://graphpad.com/prism/Prism.htm" PrismXMLVersion="5.00">
<Created>
<OriginalVersion CreatedByProgram="GraphPad Prism" CreatedByVersion="6.0.1.298" RegisteredTo="      " Login="Admin" DateTime="2020-04-08T14:46:04-05:00"/>
<MostRecentVersion CreatedByProgram="GraphPad Prism" CreatedByVersion="6.0.1.298" RegisteredTo="      " Login="Admin" DateTime="2020-04-08T15:03:16-05:00"/>
</Created>
<DefGraphButton ButtonID="201"/>
<InfoSequence>
<Ref ID="Info0" Selected="1"/>
</InfoSequence>
<Info ID="Info0">
<Title>Project info 1</Title>
<Notes>
</Notes>
<Constant><Name>Experiment Date</Name><Value>2020-04-08</Value></Constant>
<Constant><Name>Experiment ID</Name><Value/></Constant>
<Constant><Name>Notebook ID</Name><Value/></Constant>
<Constant><Name>Project</Name><Value/></Constant>
<Constant><Name>Experimenter</Name><Value/></Constant>
<Constant><Name>Protocol</Name><Value/></Constant>
</Info>

<TableSequence>

<Ref ID="Table0" Selected="1"/>
</TableSequence>
<Table ID="Table0" XFormat="none" TableType="OneWay" EVFormat="AsteriskAfterNumber">
<Title>Organoid with lumen</Title>
<FloatingNote ID="Sticky0" Color="Yellow" Left="429" Top="71" Width="440" Height="322">
<WebLink Flags="0" ToolTip="@help:stat_howto_ttestunpaired" URL="@help:stat_howto_ttestunpaired">
Step-by-step instructions for performing an unpaired t test
</WebLink>

<B><Font Size="9" Face="Verdana">
How the data are organized
</Font></B>
<Font Size="9" Face="Verdana">
<BR/>The two columns define two groups. Note that, unlike many statistics programs, Prism does not define groups using a grouping variable. Instead, the groups are defined by columns. 
</Font>
<B><Font Size="9" Face="Verdana">
<BR/><BR/>The goals
</Font></B>
<Font Size="9" Face="Verdana">
<BR/>- To determine if the differences between the two group means
</Font>
<Font Size="9" Face="Verdana">
<BR/>   is greater than you'd expect to see by chance.
</Font>
<B><Font Size="9" Face="Verdana">
<BR/>- 
</Font></B>
<Font Size="9" Face="Verdana">
To determine the 95% confidence interval for the difference
</Font>
<Font Size="9" Face="Verdana">
<BR/>  between the two means.
</Font>
<B><Font Size="9" Face="Verdana">
<BR/><BR/>How to perform an unpaired t test
</Font></B>
<Font Size="9" Face="Verdana">
<BR/>Click  Analyze, choose t test from the list of column analyses, then choose an unpaired t test on the dialog. Click the link below for detailed instructions.
</Font>
</FloatingNote>

<YColumn Width="81" Decimals="2" Subcolumns="1">
<Title>wild type</Title>
<Subcolumn>
<d>33.33</d>
<d>33.33</d>
<d>34.78</d>
<d>35.71</d>
<d>30.77</d>
<d>36.36</d>
<d>35.71</d>
<d>37.5</d>
</Subcolumn>
</YColumn>
<YColumn Width="85" Decimals="2" Subcolumns="1">
<Title>PbCreGata3f/f</Title>
<Subcolumn>
<d>10.53</d>
<d>18.18</d>
<d>10</d>
<d>15.79</d>
<d>20</d>
<d>0</d>
<d>21.43</d>
<d>27.27</d>
<d>25</d>
<d>16.47</d>
<d>17.13</d>
<d>17.01</d>
</Subcolumn>
</YColumn>
</Table>

<!--Analyses, graphs and layouts as compressed binary. Don't edit this part of the file.-->

<Template xmlns:dt="urn:schemas-microsoft-com:datatypes" dt:dt="bin.base64">eNrsXQtsHMUZnt29d86+c2yCeXZI4sZJHOfOsWO7OHjtOIkTQTBOAiYgxWffOj4434XzOk4C
LVdqaKBR69JUCgGhUGhKU4JIHxFKEXJpqaJC05QGVLWgRojSCAUVVa0QBZHOa193e+fzAxqb
+ay5252d+f9//pn555/HnjtWr127rrOlVkj7AQCjwqggos8o6BKfAAtRzL8FYEGXSL9x9MFy
APCtmO5YBICDxfah4LTJeQFBy6kFYPrm4ODg4ODg4ODg4ODg4ODg4ODg4ODg4ODg4ODg4ODg
4ODg4ODg4JgNkEAr+uyUALjeYXwXDnze7iQQgJOesHOA/RdpQV1pfIiwBLhJgSlaUrFIPE+B
8dHEYtP9KD1FKInCfEaHRtyspKKRRCQn70UoBPPSIQccwabdAz3JOMhLp9SWzlxGRyJ0bokl
tkdRGMxTritt6YiMDlXJ5tiAMgg3KsOwMzkQSWTRWYBCUV558BHNB4D8yyOnfvPG6VdOAXs6
C3PqR5PHRehgMq+cevXvIA8df146bp0OEWfS8nhIxOrkUCqmpLCGQC469vUVZnS8VM8ppWeo
t19R4Q2bgA2dChQCeduPj5SL6CYPHThuueaQCLk1okYS28HE6Wj17qf1TjoY3JKI9SajCiZm
xdJx+1eR0X5o4WzpjF/vxZTOqR+cfP+PL5/4Sw46S8bVc4DQuX6oNxaNwHWpSCKqgGw6mRg1
nT6mdIKm/g43x7YrKWBDBxKLZa9nl/xV0kvx8eiv6Vf7WcukhpneCZY70XInWe4c7O5b5CqN
wvfBGbdBb/LScnBwcHBwcPy/gQfmR4E27fkt2ClST4CD4/OFKDem6bt+XjK73ZLYEYmllChU
oaoMqjDZB29MbY8kkrEoHI6p/TA+NKAk0HTnSsFmtUI03v/7orulXyFTjBJwASlFAB8zB/55
UM6mAJnAGrpWny5gNIEqNrHUJhDjYRW4XKeOzcmnKE5giwD4+SHQri91AEuqT22oaTm1Wst8
/p4un2bSREbRwXK62ITfwybazWTRQ+NP16vK9MkNziUTrW2O9AzFIymYUgaH4uqgKZ8Oj6EV
keQj1OwTioUmlApN6Cg0obPQhK5CE7oLTegpNKE3O+Fa0IYkd6GHdxdxG8nBMZs8zwvTiG3I
Fm4rgCZKMrbio3+uu1i/tUF3Gxu+thmrePdOJTyie/mHQZlpcPewgJ/+CAxlmGU8HOOVzg64
MxIfUmAl9cYWT7n6N/3u5rvveeyl6ygTEDBYCxmsVZiKqLEkmDbW589+6dgjrVfIlIlgYi1m
sO6Eg3cNRZATCqaJdc+vTz/5buAfzZSJaGItZbBui/X1KSkl0avAHkUdVpQEHFAiicFJs/7J
kSN39F1dM0aZSCbWjgzW1yeHlRTsTSb6YlEiQDw2EFPB5Fl/WV1R2/HzesbaYWLtzGC9ZceO
6WXd/dLq1o+Cixlrp4m1K4P1WtbMpo319lP1/zmyYBFrZi4Ta3euzrWWNbOpsr6tq/eF9OIB
1szcgR8TB1nzFbVUGmuzRdZQWA5xwjmkCefgUnGpuFRcKi4Vl4pLxaXiUnGpvihSNcoefU8E
z9kL3wDJ5DIte3qZ04oZstI0B4RYNeAtAj/7xhqpYOEmPPVk3zxcfGEhmzTfZFO7eO2qknVO
+ITbEi+gz052shKwrR8BfXbqm0XGT4OaewtuLt8m24Xa9pMGnG+RabXIT7bRNGjy4lzyvfjM
YnnGiqc8v0VPQZ+af54UP92iLQykm4B9f1ZMcnkyNubMsnrJk+FYPArV3TsUENTXPAD4DuEt
mdZLBZOORtlCXECmUmjPXJOSAp+47OhZnVLWRdTIir7lfQVKUqRL4kSSPMhsqbGO6WHWUZjM
jvE5iYYsFFCk2d7dsg2mn1XReRYe5EZp1hlMwEzbixm/kJwZJ5j22M1x1GDi2JOmJ36jWxEU
ajAlzSTea+Snxki02UjqYyZSZBH+DBkvY8FLyxEENYIWrWUHoHt9JlnM7iwA6wWWNu2U27X4
UQFkpR/AtMUdJP1qUoogub4bK0XYS67d6KNSKNuAr/+Awi7pHImvw/RLzrZn0jyBwgHHaZLm
GRT6nWP6daWLXuM051w0zc9QeN59klxvwERKYJacv0LhtOfPJE0Xts6lsi5zsMyQucNnyBx3
lm0oASPoKi2QgxFxBbYkIvHde5To6iQyrQnYunOwml22ZBpjqC1y6xeDQwMDkdRuCDfFtidi
fbHeSEKN74ZRtvGhNsPKDtgEQ9WhusUQ3phQlsFkCqrDyWVqJBZHlBmhZgjVKhjta08Ow57Y
dhgbhGq/otPpxQluUCIJeAxuWnMDHhV6mYw54lshzLX7AmFjXYV5fyKWUJUUEgNCba+IruFD
NYmSDexAEUjKVCyCEqPca6va1iaqYFtfdIoKeZ3XxEVSE4b/IppchTSzl6PMBD0M+pkN0d5z
KUaGeB7Kdxl7T+MaNBMMIQPVCEpQv60ASXAV2Me2ir4HLgdHEZ+XUXgLXX+IcgUF6sNeLlwB
6gQ/aBG8YINQAm4TKsBx0s0vMfX6YiZfMRsAsLzzgHFI6jIW7yKS0Fkp5h1iHiF+1gjo4TAv
sywVzEFIonAVoG8M7WP5iojUgBwDwzyPolDO6L7MrvEBq7dYGkz3QyYHPowXFCjtMlJCAK4A
tDx1zLhj2VsEKsulWB6B0sB0bxPYe1LMe5Uy5sCaxdfqzAMmPGA8SBIdyDKseLM+JHToAwby
Uds1wxoSg+vzHYbAoo6JdLDBI2nalW7X6RRTOljtz0lwvcarw9GRl+Z9uAmKo+u1ayjRa1z8
bnc3uVZxvCNNrqsx37lj7flo4gHjkFfW04+VjRHZyBnKpUCXOb1Ubi8Bv0BXx+yXLixzAmSw
9JkK6VmhUHgJwq3K4Gbd0KirVlY3hOuQiVkVblhRW72yEZmMUHV9XW0IblzVEF5ZXVePYmqq
Q421KCJcsyzcUB2uIVEr6xqX1ayorg9hg7AsXFNdtwLlrAnVh8MoVxUMh6tgPea7YiXh+vrM
Fd3eJB0DuU1SKfssQi1PAgtMU+Yq1D1qkYloQPHXoi65xvSaZyeq8ygKO1EXH0F9ZL9pWncQ
danD6P4ZxO1ZlPc4eFNrIwylTL5SZi4k1u41k7SAmRo3kcI4qFLLnuNnDSw9NhXXsm9shtYw
msVESsoXm56oZl5Q2MmeY7MxwuLws/3MDF5CSmGYm8Ms/lLmfInM3DzLZLCfos6d5AKexzTV
numamaptKSXDUMq1z7enqClA9eIEXWINqBIExM3DZhkiKoUT/VFD/zjRh9s0h7+fvRHpzFwO
HbtPBuw0Cn5WZjn9PC/PWeZPJ32WOdfz75KyaOegnETbfhNtgei5Kedi5wfN7EI27j1umlNg
FMRsCmf/1N8qW6PaTPfPOah+BVI6B5LLToZbrRTGerIoSISCC9WKB/xQny/mw3SmOpr2F7SI
nw9PF8SpMLq+CdHFqY/K1jIIBfMSJsSrcLpzJkR3jk0ZxIJ5iRPiVThd/4To+jPKIMyCtiTM
grYkzIK2JM6CtiTOgrYkzti2VJHeY+sN/O2Fg7turu1sxiQ8bqPUVP8hEM/KY3yLJr5WCTRv
Euje5LDu+y5i7WhEot4OvR+RRiSB3N8PyuyKgSR9gHH5JvveC+gbQRWsdEJuv4OUbmue0i2U
s+tDzGqJ45fOXnosyXjSizNa+swtsza5hOCJZsPLK1x6Ied/Y5y49FgSe+mBLr0jr8f6nGPr
pKT/bHVvSO+c0dK7gP3sYKyAlrM+Z7ufhpZDJBlPeve06v7z6bWG9J4ZKn152m86loAxXz/A
o/keC8jahC/LJ7nG+GEq00klmL6aPN/p/MS7sxgEDzqhr7P4zQBdXWhBKT8Af7X8WBKlE8TX
+mhdBnZZ9jEzMcJKYD/Oa9zsckKZSugF77hO+ka83QGP+7yv29sU+MB1xrfLuzkgoNqxSliZ
HrXszJqt6h35vUcy7/cjy5L/p/7wURIRdIlVQhTRxiO609SofOjPmZVnsU7zMbL8HzBrQTR2
dbXjLYINjQw4LY3OkcchcuaIc5q2or2sofiymg8AlXJIFz+sX02l0kEeZ8+o9H7fRr+nqDuw
z5fyv+NvCqi+rf5P/LkrXWB/1kp/9+O8auze9lo9qnTBVOmHDj2lB3OlS595pQsTr3SpgLnE
zKl0Eexxb/am/B2+x927vBv9Vb7j7lHvSn8ZEq9Gslb6fMucAOhWLmjhUmaSfjmRb+8FWrK9
KNVd+lox2bBJz9W9gVI0Fhrr/qX269XL2Nuj2hBQrC8MVpuWYV3gTvS5VC5IedBeeZgmVkR+
5a30Phs47jsQ3Op9LfCwTw2mvO8F9vhuD06f8p4GVHlPo2CnPNoDXRblYWena3NMjSuZ+vJP
XV8gt75w2fPr61+O231vO+OBec6070Vne6DaecB32BkK4I3LqegL2weqrzrW2FpyNDaR6Kuc
7i0wfZXbNzZYWbEYLiML8ALr9mYNugjXz0KPlHI+Pb5Y7PffE3ih6O3ikL8rcKDov8XtfjmQ
Lppqu9vn0/R4grW7EznanUT06La0O+ym3hpmDS+32jCTyarNAfOpbV/e5udBfld5gPpdTQHq
dzUFqN+VOcBRv85rse74bgmrvGy1TtUnw5Lkl/6nyGt81NUdeAN5jcMoPfbj8Lc4QemlaZZe
k8Re+nI5TXYh9wpfJ3t6S1rjkd47YSQRhbf0x1QFjdXatuF9ALqMwdKOXCELkmZXGXsU6XQa
nDlzBnR3d5N7/H3u3Dnd25gpaWYjeP1wcHBMBOfTDjakvQ9kyZh4Yf/kAlcPB8eE8D4IOqyH
CS7MwtGZp+FpeJrC0xhjq2gaW7mmeBqeZjK9SOK9iKfhaabYixx8nsfBMcl5ntaLnLwXcXBM
sRe5eC/i4JhiL3LzXsTBMSmcl9PyN/TzYsaL30/qPx5GV/Sf0v/dknEkhJ5P9lqeav+XVXuK
7+fKDfpL5OTXIlPJO5ReFcYSfUkYzvUfsAA7qsHeOV710EhLoe+STT92Cba/s/c5CTRAjuBh
Zpmn+BNEy2t27VBSsQElocK2iKqAJDkJH2pYHqpdXhOqCaFkxdZk69tQIoFSwOd4NiZVpSeZ
vNPywGPUlRFZZCGkpIwnXppcTfYm40Ys+WJ3D5Hf9WJbRPitiebfv/rqdXYlNhpigyylZTD1
f7UiyP8DAAD//wMAcY41ew==</Template></GraphPadPrismFile>
