# Supplementary material for: Regulation of stem/progenitor cell maintenance by BMP5 in prostate homeostasis and cancer initiation
Source: eLife journal article supplement (doi:10.7554/elife.54542), 2020-09-07
Supplement: fig2-data3 [file elife-54542-fig2-data3-v2.pzfx]

<?xml version="1.0" encoding="UTF-8"?>
<GraphPadPrismFile xmlns="http://graphpad.com/prism/Prism.htm" PrismXMLVersion="5.00">
<Created>
<OriginalVersion CreatedByProgram="GraphPad Prism" CreatedByVersion="6.0.1.298" RegisteredTo="      " Login="Admin" DateTime="2020-07-16T23:56:26-05:00"/>
</Created>
<InfoSequence>
<Ref ID="Info0" Selected="1"/>
</InfoSequence>
<Info ID="Info0">
<Title>Project info 1</Title>
<Notes>
</Notes>
<Constant><Name>Experiment Date</Name><Value>2020-04-07</Value></Constant>
<Constant><Name>Experiment ID</Name><Value/></Constant>
<Constant><Name>Notebook ID</Name><Value/></Constant>
<Constant><Name>Project</Name><Value/></Constant>
<Constant><Name>Experimenter</Name><Value/></Constant>
<Constant><Name>Protocol</Name><Value/></Constant>
</Info>

<TableSequence>

<Ref ID="Table7" Selected="1"/>
</TableSequence>
<Table ID="Table7" XFormat="none" TableType="OneWay" EVFormat="AsteriskAfterNumber">
<Title>Fig2E</Title>
<YColumn Width="81" Decimals="4" Subcolumns="1">
<Title>Wild type_Passage0</Title>
<Subcolumn>
<d>0.9</d>
<d>1.22</d>
<d>1</d>
</Subcolumn>
</YColumn>
<YColumn Width="100" Decimals="6" Subcolumns="1">
<Title>PbCreGata3f/f_Passage0</Title>
<Subcolumn>
<d>1.14</d>
<d>0.84</d>
<d>1.43</d>
</Subcolumn>
</YColumn>
<YColumn Width="81" Decimals="6" Subcolumns="1">
<Title>Wild type_Passage2</Title>
<Subcolumn>
<d>0.39</d>
<d>0.21</d>
<d>0.46</d>
</Subcolumn>
</YColumn>
<YColumn Width="81" Decimals="6" Subcolumns="1">
<Title>PbCreGata3f/f_Passage2</Title>
<Subcolumn>
<d>3.16</d>
<d>4.11</d>
<d>2.26</d>
</Subcolumn>
</YColumn>
<YColumn Width="81" Decimals="6" Subcolumns="1">
<Title>Wild type_Passage3</Title>
<Subcolumn>
<d>0.01</d>
<d>0.03</d>
<d>0.02</d>
</Subcolumn>
</YColumn>
<YColumn Width="81" Decimals="6" Subcolumns="1">
<Title>PbCreGata3f/f_Passage3</Title>
<Subcolumn>
<d>4.53</d>
<d>6.61</d>
<d>3.9</d>
</Subcolumn>
</YColumn>
<YColumn Width="81" Decimals="6" Subcolumns="1">
<Title>Wild type_Passage4</Title>
<Subcolumn>
<d>0.090559</d>
<d>0.132586</d>
<d>0.049037</d>
</Subcolumn>
</YColumn>
<YColumn Width="81" Decimals="2" Subcolumns="1">
<Title>PbCreGata3f/f_Passage4</Title>
<Subcolumn>
<d>6.99</d>
<d>4.17</d>
<d>8.11</d>
</Subcolumn>
</YColumn>
</Table>

<!--Analyses, graphs and layouts as compressed binary. Don't edit this part of the file.-->

<Template xmlns:dt="urn:schemas-microsoft-com:datatypes" dt:dt="bin.base64">eNrsXQmcFMW5r557Zmd29sRlOWwuQY5xdmb2MutjkBuPtyp4JL8Xd2BnYWR3hszOcuVwNIgY
fboqAqKPEERFDEbU8PBI3Pg0z8TjaURj4olPX3gJxphD4xFJVXV1d9VM9xzMDjBrfdA7/e+u
rvr6+7qq619fdXf7zDlz5p4/IyAknQCAfqFfMMC/neBiww/AeLjlrwJg5GKD9Is2b60DAEFD
sn0iACa4ZoZLF/lFR1rJuhEuR6DIR5rIr4ytgAsXLly4cOFS6mIEan/Aws3BhQsXLly4lOz9
nAsXLly4cOHChQsXLly4cOHChQsXLly4cOFSuBjBmfDv+UYAzjapv7kLmm83RRCAWZppZwIb
T9ATtSTRJMJKYMUnLMmMeCTUneGE0dTEcgr3S7MJjQZhLMkHbTCAC9b0LI51A918JsKlWjOf
KpIPnuAILopEl3bCpTeDPiM18zGQfKQQysJIT7hXPDe8Sjw/1hOKpuUzDi6ujPpIp3JhON4Z
ioaAXj7ovCoy2gdNzVgPgo/ufv7JV1545nmgnc943Xzk87LgfFA2zzz/7HsgQz7OjPlYlXyw
Oketjw1vmBnri0fCcWRpoJePtt8bSD52yV/x8OK+JcvCCfGcC4BGPhPg4s5oZwc+L2ybDPmI
Wc+rDG8InhlKhKJLQf75yNePU/I7rmDiomhkSawzjDJjZUrW+uVSrx/p5DTzye73cimf53c8
/f6LTz3yW518Jme1sxvnc3bfkkhnSJwbD0U7wyA9n1Tpp6Y3S/lUUO2GuDCyNBwHGvmIuMXS
trMl+G1cS9H06O8oaxvJlSk1zBISGGRgkJFBJoKuxWtJuNwCDlilWoy2H722XLhw4cKFC5fj
LejGfJtCV34OVhr45Csux0MMwVbMy42QCdXD30XRFaFIPNwpJsREuDchrgj19oaWhkUvZDgj
BXaAAj/qZ1Af+fuy90RPx6yiEhzBdfkzYqH9oI70+lMFWegrCkNAzLgNTCVc0kaOziZnYK8Z
ML9CZXwBt7kplrEdzFNGNwCT6guN3NyMpv1C6v7fK/oBZewl/TEQK9EfcevpeLxELl8aoqpR
rh50VBBbbWFocV93KC7Gw7193Yle6jhFbCqTMuDjcG7aCQ25JjTmmtCUa0JzrgktuSa05prQ
lmtCe3rCOWAW1NwCd37TxZtFLlyGUmfzyCDKpbAtvDSHPGGSAf8nH8w9UX/lMcFLye3rUnXg
7vJClluVjv1doAaob0CwkQXtvRv0Uc2ykbpxt4srQ919YXGS1AE7tWD32z7d/9nH97w7HeBC
gFstWkgpOiHGQ4lIDAxa0ad4Hjmw5Ym3SNECVbQhpejzxd5v9IVgvxMMUtEPfjjx1jv37iFF
G6iijSlFz4p0dYXj4eiSsLg4nFgVDkfFnnAo2ltQ8RMe30+KNlJFm1KKPju2KhwXl8SiXZFO
rEB3pCeSAEdf9I6nf/mXmT2vPy4VbaKKNqcUvWjFisEt+rzO91qXd8mXmZkq2pJS9BxymQ1a
0e/86r6Rv/vUHpSKtlBFW/Uq1xxymRVa9Afrrr9vx9g3yVlb3ffgDrLcV5RTyUXTLbIsuR1h
yPsIY95HcK24VlwrrhXXimvFteJaca24Vl8WrVpJGMQE7GCURhgk1qVEQnw5RkIGJZ6Xyi9K
LhJiKjgSYs8zElJFxTiqdSMhVVkiIdUpmvJICI+EcOHChUdCeCSkaJEQUzEjIWfNmvj1011r
dSIhpmJGQjrev/oN64c1Qe1IiKmYkZDv3+A95yeH/6ATCTEVMxKyaNGil07bZAlqR0JMxYyE
jPvjOfFvNf9tunYkxFTMSMizv/nZvvZ5lUHtSIipmJGQfzzwyYd/f3i+TiTEVMxIyDXvbb37
wavu4JEQrhXXimvFteJaca24VlwrrhXXqgQjIebskRD/sYyEpPKLkouEmAuOhDjyjITUUDGO
Wt1ISE2WSEgtj4TwSAiPhHDhwiMhPBJyrCIh5mJGQly/Dr994KMenUiIuZiRkG9vuNCzu7NO
JxJiLmYk5NCeipmJdw/rRELMxYyE3Lv7ssjUT6p1IiHmYkZCdk3/t6/1PWEOakdCzMWMhFz5
41MmjK4cpRMJMRczEjK84rPO2p0v6URCzMWMhLwGrLGqynoeCeFaca24VlwrrhXXimvFteJa
ca1KMBJiyR4JCWhEQmQNBj0SksovSi4SYik4ElKWZyRkJBXjGKUbCRmZJRIyikdCeCSER0K4
cOGREB4JOVaREEsxIyFbNy9oPrRglU4kxFLMSMijKx/dVXdbrU4kxFLMSIjtjMfuWjBeLxJi
AUV9O9bA9zctHK4TCbEUMxKy8K7Kw09ss+lEQizFjIQs3/Tou+9NHacTCbEUMxLSU//qtAd6
d+hEQizFjITsFR56cfljZ/FICNeKa8W14lpxrbhWXCuuFdeKa1VSkRBbUqLEdjAGpYvHLgsv
SYiRaFdMbIAMRYqGQL7UmwhFE70kGnLIKC2y7EyhB4MSDUnlGCUy7FQGvMQnKF7gJAuyyHxq
OY8vJ+wCCIOerzW+ApdJpKaKP7AyFa0PL4LmNrqCC3S1vdyA8fX4yzrykfJQojOl9N/h8pcR
PSUUYdBlDFrOoG4G9TAoyqAYg1Yw6BsMijOol0EJBvUxaCWDVjFoNYPWMGgtg77JoG8x6NsM
+g6DLmdQkkFXMOhKBn2XQesYdBWD1jPoagZtYNA1DPoeg65l0HUM+ncGXc+gGxjUz6AbGXQT
g25m0EYG3cKgTQzazKAtDLqVQVsZdBuDbmfQfzBoG4O+z6DtDPoBg3Yw6A4G7WTQnQy6i0F3
M2gXg+5h0G4G3cugHzJoD4PuY9CPGHQ/g/Yy6AEGPcighxj0YwbtY9B/Mmg/gx5m0CMMepRB
jzHoJwz6KYMeZ9AAg37GoCcY9F8MepJBTzHo5wz6bwY9zaBfMOiXDHqGQc8y6DkGPc+g/2HQ
Cwx6kUG/YtBLDDrAoJcZ9AqDfs2gVxn0Gwb9lkGvMeh1Br3BoDcZ9BaD3mbQQQa9w6D/ZdC7
DHqPQf/HoN8x6BCD/p9Bv2fQHxh0mEHvM+iPDPqAQX9i0IcM+jOD/sKgvzLobwz6iEEfM+jv
DPqEQZ8y6DMGfc6gfzDoCwYdIciJ5+jIIvdNUc8jeDn6Qngd1Z9HvRS0dYFMK5Jt9OwWchxa
D1OzLEyk/yuA9LlAdjwfYybhFqAChywkuQEXTU9SQRnIn4fvJ1ndpEQc94GzSciDZj0C+XUB
dRpQGcl3IlBfneUhSqJg0emkDHdQOkFjlhO0ZTxBpNGFKPSSw9k5iAZaZ1eRwg0dWMNrSEo1
8mojfM5Kyp4TWeqbrTOFzZQkHc4cziTVOkOty59O2hzEQxPIglJ1cnJ0wi7jSX0+T4e0TadI
m1yT0Eczz4d/98FWQmtbKmmjiZ2NIW0ClcpBWhc53s82srK+6Y1sudzIJtQU0l6Bas+CK1P3
yi+91t6LruFq3b2oOajR3YtqfK3uXgtpUeW9gNmLfDFK3htX90qtajl1Y0FbrVSrKhDrOiir
C0yris7nokh3p5hYsyJ8abs0VdeboYmls6hSmliz0si7C1LnJDRwtnhmPDw3lAj5u07rylel
YYpKJkWlqjxVMmS3kC9vCxkVdaoLUkfXQr68LaSqVDP4FvIXYKHa4ljIX4CFRg6+hQJ5W0hQ
1BlVHAsF8raQoPSdBI2+ky3HD2anDoIrksPpDPW7sf4g+GGybON9lpLuT03S6E+58ACDC0wR
yjW3pfanhqXM1pX6U8PIEI2cykmxL2lQPLf+1EkUaWV7H8NSQlXofLrIEQaijDNFx+FksUtn
VgF8grxZIIcD0DE/dQJymzQ+Ml8gaZPm4Dx5e78A0tKjUfkKwwqcfibWrwKvo5Hup4UNeN0K
/0wSahYIZKRptfEQ3t6I8q98e15qnmjMbovpBZwGjUEuMw8o65Ms0jpKc8gipUGjiPutT+N1
zPYrxTQ90SjdC7ZXcZqLUctcHVR0rqhRdW53qDp3m2sWVIJ1cC0p4CdfusPijGioe83acOfM
WHdfT1Q8c2Wvh6zOSG1/RXkWo7LS29fTE4qvEcULIkujka7IklA00b1G7CQzWxPTxUntYpvo
9XgbTxXFf42Gp4mxuJhYFZuWCEW6Yc4ko+mimJgqdnbNi60SF0eWipFeMbEsrOSzBCU4JxyK
invFC2afIwVEJR11tp8pinrTa0WxtXECPQE1Ek2E41ANUZQnA0uTNMVEDCbrWQE3QC3jkRBM
DI+eM3XWnOhUcVZXZ4EGeZl74gTxhNplGUb1hpKkBVWHg5aRNkSmT+Ww4RoGjxuOGzAAxkAe
44UNVCuohPV2AojBHtd1uBFHkZ16sAeW8xRc3oDrH8OjKgTpibZ6YQRoFJxghmAHC4RK8DVh
AooPCGqfVi7TQH5tlL7yU3DDyXYL1kTiVKhsL5Ceu0L7WoH09J+dtCwTSAchRnqHZSTKZSU3
DhSPqidlonhJHcn3KbJeQcap60m+HxM9UO+zQpDyrsFnCMAI0kdvJI070n2GIOmCGn7UnFaS
fL8mSLrJPdeTqF4tfcMYRmxCD53leMOYiBNtT2ust+F76/3KDWPAIt0wrsQD0f3z9aYdCGQc
E1gGcHqkatIFlHVow3lyg77dKOL80ZMfQVN7xjxReHKDYct8WQfR2I/XUXD3fmNSaei9pg3K
TejtKvYmlJonul+/bffOl3UWa1WdB6aoOgengnmVODj1oDyWqc2zYVuVPh7g9TQFGpujvefG
FirtTOIMryfQ2uSHTcwZgQaPN+CFLQashK2BRp947hn+Bk+Dvxlvamj2+tEWtLOpiWxrDbRM
gxkEAj7UJsAC/M2NqAq3eL1+jy/QMlX0wf8wRbO3FRX8cikrr90sPQj0myUz+TsMVjYjGK2M
YaBGwAKa4BEtcDkdVstZwEX14KpBJ0y7EtaR9bAKbiZNFsC1oQzcA4/9ETxuL1z24SBVFXU9
makHPeTmaATVLI0m6eWmyEKqaxM5DlX/FrLuICPc8oPIs0gzVE6u2WrS/HTKTQyZyFBBmp/1
5LeKhMStpMnZRvIbRsLFFtKk/IiUW0fCuoYso/r23L9hqEtOh4CJCm1oODn9MpFTozKCBMC3
YA/nOdjr0dqWSk7rNMlpHSGnRrIcLTkdrktO6eNNRMcuckQqOa3j5PQYktNZKiWaWQKUaKbO
9lmlT065J44DOa3j5PSEJKfDKRvQN4w6DXJad+KRU6x+eVAhp/cTcoobblMwY579mJxuV8jp
JEJO0emvsHYo6+22DqUP2FE1kLXP2E/1GZM1ks7I/WBRcq5y7pODkJw+QOZu6vM7nxa/gzTL
620KTJ58SbiXJniNHp+/EfM7r8ff6PdLBK85EGhCdM4PiZ1E5hr9gQa0xedp8fnJllZIAP2+
JtQgBOBKg9fT0uxramzwBBplauf1tzSgIl8uUb21G6P7CqSkRvAVWBlnAyfVb6sBYZh2FaxU
V8HlZirAeCu8EnZCvBteLffCY4tHSY2kAfoKxbdmk8os860a0uiEKb61iuyvJLPSy8m+m0lZ
tWRWtsy3dlJ8azfVUNxLdMhESR25f0ymGJT0RDFRoc0Lp6RfxnipG8dG3WCKUKG5LZWS1mtS
0vpBipeO0KWk9SmNm4PcVkdoUNJ6TkmPISWdoxKh2SVAhGbrbJ9T+pSUe+I4UNJ6TklPSEo6
grIBfcOo16Ck9UOLkm7GlHSXQkm9FCVNUpS0g6KkyRz6jNtJn7EN3ySkGyS6+2+vTSo6B6ci
SrqfPPqnT+38WtQOBQu9/uY0atfk8ba2EGrn9XlJzNHb2NwcQEyu0eNtkJhcS0NLC9oS8LS2
qlt8nmafF7UIzR5fU7PX0+r1tfq8DQ0+idvhKu31NkyePFkipqWsvXbD9FAR6GktvIaqwGpY
wdbDZSNFT7fCRuFOWMH2wEZm73Gnp7WkAeqiuNdqinutp7jXRop7baW4152k/JNIo2aiwoHZ
6GlZ7m/4Pl709FiYqNCmhtPTLxM9NVFU9DnBDUYbKjS3pdLT0Zr0dDShpybqadCjoacn69JT
ulwLqRVd1ENYND0dzenpMaSn81RSNLcESNFcne3zSp+eck8cB3o6mtPTE5Kenkx16+gbxika
9HT00KWneNqucYMyFXiFtV2hp0GKngaz9BmRDkm7qKYnEVOs5+TgvHwjpgEtgheQaJtG5DHg
bZAJXqu3mYQefYEGPCe2yRPAgcYGT0Mz2eD3Kxv8Hm9zC2oPWj2NLS0o8NgKkzf5lLij19si
E9PS1Fu7MbqvSJS0EqyCFX0drOA3UZR0C0y7A+Jd8Lh7TyhKWkmFA10Er6P41k0U39pC8kT6
7aDCgbuoiHTmiGlVUno8N/urOWzUywZK3RaFtiPV+Czjlusca11tbiO2ixlsAj5wFjzKBsYC
pwmdlQF0wuvHTOZ2bgMBYiP58dv5NvlaSyH5A4uD8jWI9tUwX6YaBhZj+8q3S/mN+vJ6FbVe
Ta3XUOu11LrW96q+wN+rsgnqzYcu7QvypDT9iRF3lv1VWfZXZ9lfk2V/bZb9uX5vS2//jZiv
2ohXTNR8WyP1Sh4BX43jqY4K/QUu+Zp3kuv5JEzStOVP06VfMahim1V6fFXA9W8k7NCk5SA2
HZKPkGU8he83SR0tqRtxMmTDWjpcEtS6GukcpJeTjIFX+jhwJ+bUBpBZBjPVnqQT5PJi2kyy
K6eScsvXkVe+KPWeIHsOQs5lCXmVlXu+ZXnlW6ZxDoacyzLkVVbu+TrzyteZcg7CELiWhCFw
LQlD4FoyDIFryTAEriVDyV5LE5Jrqai12ht467Gtqy8MxKejjrvNqp61QPhQd1oPQv01UOXa
6CKV3hdQek+r8FlNw+MI0nV0EPYb0D4JH4T/3BR+QjgI++QqvsNwEPaTVbzOeBD2Y1UcNh2E
PSUVzzEfhD0aFU+0HIT9G4SvUl6rxHR0oCXWk/O5mvxuANJXNCcQ643U7ddI1vtqBuuND6b7
25B2pWe3nrb2SJNs2o8qae1Hg9ReaCWWK6arvUg97UEwvb0QtCuLrvZAV3ukibb2QNH+5Iw9
4vtN+dle1l4YBO31ba9qL5a09mOANvsYyOHKma973Q/ClYM1yab92EG1ff61tjDbjytR7euS
cvRffm/iWOWVqXLfZhweM3Kk9XnGACVuTH3QQ0yOxvtF0+f2ba4PqmaZRMda1zNV0qjPDDca
K39NGZdBd38pnwpA3l+LewM1YDUTS06VdeQMtPsRcmlA8/4naWgHvZYN5edZO9ybLT8sn2Zt
c19u2Vg+27rQLUDvsBpOSvbjUQmBjACgmi1Ho1/L3DsNLj7zL9NtwAxMGZPZocUMYBM4C3TC
TA9KoyU21doOMpZLy6lKnrfjEIybtoJBjawDYiFBI48UMTMXnQmon6BM+SouTmnUONpMpZWH
bhxplw8Ak4JeRf0GZa0Qp4MMnUnV6QutPeU+W4d7tfXG8nJbm7vDuqb8FJu+09EMf3ea0z/9
IqMZxcmHPoJOFyinb9++U1lopxuL7nQhf6cbdZwulKjTG21vlVfbO9yX2IzuD6DTZ9j+UG61
6zsdua4qzenDMzsdVLz5JnS6gXJ6MplUFtrppqI73ZC/0006TjeUqNOH2ae6/gqdfrq93fWC
vc091t7iOpTB6SgaXJ3m9JZ/ZDTj2y3LKoI2aB/V6QcOHFAW2unmojvdmL/TzTpON5ao0z+2
17pfdnS4Rzha3XsdbW6jY4z7Fw59pzsgrklz+kWfZ3b6efu3wZpuopze0dGhLLTTLUV3uil/
p1t0nG4qUae/6qh17ivrcH/uaHXeVNbmftcxxrm7TN/pZRDXpjl95WcZzZh88+HhsKY7MtzT
Jfs4oG2L7XRH/k636jjdUaJOf7jM7t7s7HC/UTbN3etscz9VVuu+1qnvdCfEIxWny3LLp5nt
eOBvA7CmWzLUdNnptqI73ZK/0206KS0l6vStzrFlq10d7p8655QtdLW573J6yrpd+k5HId9R
aU5/6JPMvXcUCrYBK+X0Q4cOKQvtdHvRnW7N3+l2nZTWknS6ATxiWQi7bu2ONy2r7TWuqY6P
LP32z501UD2vwDp9LEj9yiI1tqCUUkNpf5r0Froj0pltgKm+gXMMkP1TklWk7cDseUDOYyq2
Gp73M418dUMespEmfEgTX5zEsZ2wxi2Hf6cEczKXqG0u/JoUeOqZzdVkv71qn2N99VftA1U3
ORZXx+2vVq11LKgGwGccHHPdYpTMdYsRfUIy3VwubC4LYy7U4ly8MJLoDqfay1m4vYC+vdC5
Z7ZXhXm8E1i2uQLmec7XzWtdZ5s7nE+aF7sKvbzWGWV7nU8ur6/rXF7lOva6hNirnurd0/ay
4DKO1mqmDFeZlHMmq/203Onc6n7M9U6517nSvcX1afk859fdSVehV9l1DtlqjwDJauj5By2r
ubHVrIzVUBN3SUNWs6FCimO26zJebDYgmurc0qhom1saFUW/aFQ09QYmjbramcgvQpOxFiNA
ulkLHTFFmmTWfr/5c/ttlg7362bRsQqmR6Os6NeQp/ajB1l7WRNt7euCSTxbc4NwBZ4JOfnM
7tCS5WIo2iletCySCMN7sXzbvBKIFvVmqBn9yGE6Aj2QjbgBGv5BowGoy4gw+kU9CZk3lEqa
oSjcP1y4cMlHDidN5Jb2PggaVfqF+idHuHm4cMlL3gcVJnYq8ZEheHfmaXganib3NOq91UDd
W7mleBqe5mhqkZHXIp6GpymwFpk4z+PC5Sh5nlyLzLwWceFSYC2y8FrEhUuBtcjKaxEXLkcl
h4PJ4HeV2WHqC7LuwJMH1RH9ncoXzKjJifjpQTuz1waUaZB4L8JVwZaktM2O50u2x2OXhZck
xEi0KyY2aLx1S556QT+19Odrnwvm+iaJwRebkPZQOq1gkUWaLiUXpT4ZNCXYQ6biAXWa6cCw
b8acrwhRbP/Zq1eE45GecDQhzgolwiCGn2D1Np/mDZzm8/q8IIpnO1LJ5s+CibDPo3iGz7mx
RHhxLLac2WFTvahudDEZhePqHruUPBFbEutWt+Ifgr6H3xxFgkfoaefpzz377L9o2UK9RFuC
xmQQsPPhj0aE4D8BAAD//wMAp0GZXg==</Template></GraphPadPrismFile>
