# Supplementary material for: Regulation of stem/progenitor cell maintenance by BMP5 in prostate homeostasis and cancer initiation
Source: eLife journal article supplement (doi:10.7554/elife.54542), 2020-09-07
Supplement: fig2-figsupp2-data1 [file elife-54542-fig2-figsupp2-data1-v2.pzfx]

<?xml version="1.0" encoding="UTF-8"?>
<GraphPadPrismFile xmlns="http://graphpad.com/prism/Prism.htm" PrismXMLVersion="5.00">
<Created>
<OriginalVersion CreatedByProgram="GraphPad Prism" CreatedByVersion="6.0.1.298" RegisteredTo="      " Login="Admin" DateTime="2020-07-16T13:41:41-05:00"/>
</Created>
<InfoSequence>
<Ref ID="Info0" Selected="1"/>
</InfoSequence>
<Info ID="Info0">
<Title>Project info 1</Title>
<Notes>
</Notes>
<Constant><Name>Experiment Date</Name><Value>2020-04-07</Value></Constant>
<Constant><Name>Experiment ID</Name><Value/></Constant>
<Constant><Name>Notebook ID</Name><Value/></Constant>
<Constant><Name>Project</Name><Value/></Constant>
<Constant><Name>Experimenter</Name><Value/></Constant>
<Constant><Name>Protocol</Name><Value/></Constant>
</Info>

<TableSequence>

<Ref ID="Table7" Selected="1"/>
</TableSequence>
<Table ID="Table7" XFormat="none" TableType="OneWay" EVFormat="AsteriskAfterNumber">
<Title>Bmp5 expression (Fig2S2A)</Title>
<YColumn Width="81" Decimals="4" Subcolumns="1">
<Title>Wild type_basal</Title>
<Subcolumn>
<d>0.95</d>
<d>1.08</d>
<d>0.93</d>
<d>1.14</d>
<d>1.03</d>
<d>0.9</d>
<d>0.96</d>
<d>0.44</d>
<d>1.33</d>
<d>1.55</d>
<d>0.94</d>
<d>1.19</d>
<d/>
<d>1.23</d>
<d>1.18</d>
<d>1.15</d>
<d>0.95</d>
<d>1.02</d>
<d>0.88</d>
<d>0.88</d>
<d>0.88</d>
<d>0.81</d>
<d>1.13</d>
<d>0.93</d>
<d>1.05</d>
<d/>
<d>2.1</d>
<d>1.97</d>
<d>1.4</d>
<d>1.13</d>
<d>0.99</d>
<d>1.21</d>
<d>1.27</d>
<d>0.64</d>
<d>1.01</d>
<d>1.23</d>
<d>0.5</d>
<d>0.7</d>
</Subcolumn>
</YColumn>
<YColumn Width="100" Decimals="6" Subcolumns="1">
<Title>PbCreGata3f/f_basal</Title>
<Subcolumn>
<d>1.89</d>
<d>1.63</d>
<d>2.23</d>
<d>2.11</d>
<d>2.05</d>
<d/>
<d/>
<d/>
<d/>
<d/>
<d/>
<d/>
<d/>
<d>1.96</d>
<d>2.65</d>
<d>2.1</d>
<d>2.47</d>
<d/>
<d/>
<d/>
<d/>
<d/>
<d/>
<d/>
<d/>
<d/>
<d>2.15</d>
<d/>
<d/>
<d>3.46</d>
<d>3.19</d>
<d>3.41</d>
</Subcolumn>
</YColumn>
<YColumn Width="81" Decimals="6" Subcolumns="1">
<Title>Wild type_luminal</Title>
<Subcolumn>
<d>1.41</d>
<d>1.29</d>
<d>1.07</d>
<d>1.33</d>
<d>1.32</d>
<d/>
<d/>
<d/>
<d/>
<d/>
<d/>
<d/>
<d/>
<d>0.83</d>
<d>0.95</d>
<d>0.9</d>
<d>0.88</d>
<d>0.99</d>
<d>0.38</d>
<d>1.04</d>
<d/>
<d/>
<d/>
<d/>
<d/>
<d/>
<d>1.11</d>
<d>1.07</d>
<d>1.1</d>
<d>1.1</d>
<d>1.02</d>
<d>1.22</d>
<d>0.88</d>
<d/>
<d/>
<d/>
<d/>
<d/>
<d/>
<d/>
<d/>
<d/>
<d/>
<d/>
<d/>
<d/>
<d/>
<d/>
<d/>
<d/>
<d/>
<d/>
<d/>
<d/>
<d/>
<d/>
<d/>
<d/>
<d>0.910982</d>
<d>0.904667</d>
<d>1.003785</d>
<d>1.185471</d>
<d>0.999959</d>
<d>0.995136</d>
</Subcolumn>
</YColumn>
<YColumn Width="81" Decimals="6" Subcolumns="1">
<Title>PbCreGata3f/f_luminal</Title>
<Subcolumn>
<d>1.13</d>
<d>1.26</d>
<d/>
<d/>
<d/>
<d/>
<d/>
<d/>
<d/>
<d/>
<d/>
<d/>
<d/>
<d>0.97</d>
<d>1.07</d>
<d/>
<d/>
<d/>
<d/>
<d/>
<d/>
<d/>
<d/>
<d/>
<d/>
<d/>
<d>1.09</d>
<d>1.26</d>
<d/>
<d/>
<d/>
<d/>
<d/>
<d/>
<d/>
<d/>
<d/>
<d/>
<d/>
<d>0.757858</d>
<d>1.931873</d>
<d/>
<d>1.03</d>
<d>0.99</d>
<d/>
<d/>
<d>1</d>
<d>0.92</d>
<d/>
<d/>
<d/>
<d>0.65</d>
<d>0.6</d>
<d/>
<d/>
<d/>
<d/>
<d/>
<d>0.691243</d>
<d>0.624054</d>
<d>0.913993</d>
<d>2.084539</d>
<d>1.934162</d>
<d>2.309783</d>
</Subcolumn>
</YColumn>
<YColumn Width="81" Decimals="6" Subcolumns="1">
<Title>Wild type_stromal</Title>
<Subcolumn>
<d>0.9</d>
<d>0.54</d>
<d>0.56</d>
<d>0.61</d>
<d>0.75</d>
<d>1.13</d>
<d>1.08</d>
<d/>
<d/>
<d/>
<d/>
<d/>
<d/>
<d>0.69</d>
<d>0.59</d>
<d>0.55</d>
<d>0.76</d>
<d>0.72</d>
<d>0.8</d>
<d>0.57</d>
<d>0.74</d>
<d>0.58</d>
<d>0.7</d>
<d/>
<d/>
<d/>
<d/>
<d/>
<d/>
<d/>
<d/>
<d/>
<d/>
<d/>
<d/>
<d/>
<d/>
<d/>
<d/>
<d>0.736071</d>
<d>1.407995</d>
<d/>
<d/>
<d/>
<d/>
<d/>
<d/>
<d/>
<d/>
<d/>
<d/>
<d/>
<d/>
<d/>
<d/>
<d/>
<d/>
<d/>
<d>1.037237</d>
<d>1.143009</d>
<d>1.158951</d>
<d>0.813816</d>
<d>0.861162</d>
<d>0.985825</d>
</Subcolumn>
</YColumn>
<YColumn Width="81" Decimals="6" Subcolumns="1">
<Title>PbCreGata3f/f_stromal</Title>
<Subcolumn>
<d>0.49</d>
<d>0.53</d>
<d>0.72</d>
<d/>
<d/>
<d/>
<d/>
<d/>
<d/>
<d/>
<d/>
<d/>
<d/>
<d>0.51</d>
<d>0.66</d>
<d>0.81</d>
<d/>
<d/>
<d/>
<d/>
<d/>
<d/>
<d/>
<d/>
<d/>
<d/>
<d/>
<d/>
<d/>
<d/>
<d/>
<d/>
<d/>
<d/>
<d/>
<d/>
<d/>
<d/>
<d/>
<d>0.440714</d>
<d>1.354646</d>
<d/>
<d>0.856034</d>
<d>1.288542</d>
<d>1.760201</d>
<d/>
<d>0.66</d>
<d>0.5</d>
<d>0.83</d>
<d>0.97</d>
<d/>
<d>0.5</d>
<d>0.27</d>
<d>0.37</d>
<d>0.49</d>
<d/>
<d/>
<d/>
<d>0.53483</d>
<d>0.561308</d>
<d>0.776801</d>
<d>1.121558</d>
<d>1.364795</d>
<d>1.874869</d>
</Subcolumn>
</YColumn>
</Table>

<!--Analyses, graphs and layouts as compressed binary. Don't edit this part of the file.-->

<Template xmlns:dt="urn:schemas-microsoft-com:datatypes" dt:dt="bin.base64">eNrsXQt4FNW9P7M7+8xuNmwSCAFxRPiMEsJu3vFGWR7GwIcWBRWp/cySbGAl2Y2bDU+rW6UW
kda0WoVqFS2+qlh8K3prbq+0UBBR0eut2ku90mKrFq2Pq4Lcc86cmTlnM7PZJVll4/nnm8z8
zpw55z//M+fxO/8zs3NnNDWdff60aiHhAgD0Cr2CCf5vAwtMd4IJMORjATCywCTvUfAvSgBA
0JSYewoAM+GRBW7tZI+utJFjM9yOQlGuNJO9gm2ACxcuXLhw4ZLrgvp3kfT9XLhw4cKFC5fc
7c+5cOHChQsXLly4cOHChQsXLly4cOHChQsXLoMXM5gO/59vBmCOqO3TF7TebpIgAIu80k4E
Nx2nN2pNoEWEI4AN37As02LhYEeKG0ZLE/Mp3CuvJjSbhPEkHRRgAvNWdi6KdgDDdE6BW6Fu
Ol6SDl7gCC4KRxa3wa07hT5jddMxkXRkF8r8cGeoWzo3tFw6P9oZjPRL52S4uVPqI9/KhaFY
WzASBEbpoPsqSGkftDTjWhB45td7nn9t7649QD+dCYbpKPdlxemgZHbt2X0ApEjHlTIdm5oO
VueY9bHjgBnRnlg4FEOWBkbp6Je7n6TjkMsrFlrU07okFJfOmQd00pkIN09KOzvxfWHbpEhH
GvC+8nBAYHowHowsBpmnozw/LrnccQWTLoiEW6NtIZQYK5MGrF9u7fmRb043nYHLPV9OZ89d
O95/afu2Pxmkc9qAdvbgdOb0tIbbgtLZsWCkLQT6p5MsvdTyZjmdAqrdkOaHF4diQCcdCbdY
+na2Br6PaylaHn2lenQTeTLlhllGAoNMDDIzSCToenyUgNvPwT6bXItR+LFry4ULFy5cuHD5
pgV1zLeqdOX3YJmJL77i8k2IKdCAebkZMqHJcH9BpCsYjoXapLgUD3XHpWi7NL2zq0YKreiK
hbq7w9GIVNYUXlw5r3LaqZD0jBXYOQv89p9Jewvw2z44PR0TjRHgKK7eXxILPQVKCBFIFmSh
f1NJAyLLjaCc0Es7uXogOQOU4tTzSfyv4Oahrt0EmtUJD8DE+konNeVKpdSSz/9d1Q+o0zHs
myFWcid2Qren4ikUJX951qpIfXrQVQFstfnBRT0dwZgEn7uejng3dZ0qdo1cmfB1ODX9iKZ0
I5rTjSimG9GSbkRruhFt6Ua0pxvR0T9iE5gJNbfCk6vdvKXkwmU4jT+PDqFcCtvCS9NIE0bp
q/r8n2cfr3tlmvBS0n1dqs3lXTWYbaM61r8HFAHtowh2sqGz94IeqllGnZDScc+VlgU7ekJS
mTwmO3XQxe+84PGbn9648AyAMwEeLWshKeu4FAvGw1EwZFl/cGJX59MHTg7IWQtU1qakrM+X
ui/vCcKhKBiirL946MJ1Sx85MFXO2kRlbU7Kema4vT0UC0VaQ9KiUHx5KBSROkPBSPcxZ/3k
Fbue+XL+JyRrM5W1mJT1nOjyUExqjUbaw21YgY5wZzgOjj3rdbvmOR8TPyRZi1TWlqSsL+jq
Gtqs35k8o3PG3Z+TrC1U1takrJvIYzZkWR+e3HukcoaTPGZWKmubUeVqIo/ZYLO+8eZbzixp
XUHu2ua5Hw+QRcCSIiVrukVWJL0rTBlfYc74Cq4V14prxbXiWnGtuFZcK64V1+rbolUD8YyI
2fOMDInLL5lv5JxnRBy0Z8SRoWfES/k8Cg09I94BPCOFSQ8T94xwzwgXLly4Z4R7RrLmGRGz
6RnZdMcrJ7ZaX5qq7xkRs+kZ2bpmofNz20dT9T0jYjY9Iy1lVWvmt/zSwDMiZtMzUvLQ2X8R
HX0GnhExm56Rh35z18eHz3v6OX3PiJhNz4i4sGvcmu+9ZuAZEbPpGXlr2+pr3v3rKAPPiJhN
z8jmKz9sKV/o5Z4RrhXXimvFteJaca24VlwrrhXXKgc9I5bj3DOSzDdyzjNiGbRnxJmhZ6SI
8nkUG3pGigbwjBRzzwj3jHDPCBcu3DPCPSNfl2fEkk3PiPd7Rw/1nf6BgWfEkk3PyK3eqy1f
vfGwgWfEkk3PyHtg9tWP31hq4BmxZNMzkvik7JJb9q5+Tt8zYsmmZ+T6+fe+3PePnQaeEUs2
PSNV29+55MmKHQaeEUs2PSO3jeoJlDxi9M6IJZuekVdWPjzh2WUx7hnhWnGtuFZcK64V14pr
xbXiWnGtcsozYk/IlNgBTkLxYtHLQq1xKRxpj0p+yFBk7wjkS93xYCTeTbwhB83ypjoukujB
kHhDkjlGjkw75QEfKRPkL3CRDVlkFrWdx7fjdgOEQc/SKV00kVVGaqp0p42paD14E3TD6Aou
0NX2KhPGP8Hfm1OuVKYSXUm5/w3nv4ToKaMwgy5j0FIGdTCok0ERBkUZ1MWgyxkUY1A3g+IM
6mHQMgYtZ9AKBq1k0CoGrWbQFQz6PoOuZNBVDEow6AcMuppB1zBoDYN+yKBrGfQjBq1l0HUM
Wseg6xm0nkE/ZtBPGHQDg3oZ9FMG/YxBNzLoJgb9nEE3M+gWBm1g0EYG/YJBtzLoNgb9kkG3
M+gOBm1i0J0MuotBv2LQZgbdzaB7GHQvg+5j0P0M+jWDHmDQgwzawqCHGPQbBm1l0MMMeoRB
jzLoMQY9zqAnGPQkg55i0NMM2sagZxj0LIP+nUG/ZdBzDOpj0H8w6HcM+k8GPc+g7Qz6PYP+
wKAdDNrJoD8yaBeDdjPoBQbtYdCLDNrLoJcY9DKDXmHQPga9yqDXGPRfDHqdQf/NoD8x6A0G
vcmgtxj0Zwb9D4P2M+gvDHqbQf/LoHcYdIBBf2XQ3xh0kEHvMujvDPoHg95j0PsM+oBB/2TQ
IQZ9yKCPGPQvBn3MoE8Y9CmDPmPQ/zHocwZ9waAvGXSYQUcY9BWDjhLkwmt0FFHGpmjkEbgK
/ZRGCTWeR6MUFDpboRWJRnp1C7kOHYeoVRYiGf8KoP9aIAdejzGDcAtQgD0mstyAs6YXqaAE
lN9R6SVJ/Uz1OD4B5hCPC816BLJ3k8zHAvn3SlC6pwDtBZIKoiRymZxO8vAE5Bs0D3CD9pQ3
iDS6ELle0rg7J9FA7+4KkrihE2t4HYmpeV7thM/ZYN5ogVQmy9pkJx4ZhKZxd8kWG240oD+R
c5JSm0g2FKuNE6bjdptA6vh5BkRuKkXklEqAPqKwQPCC+4VC3bBkIkeTPStD5JQXMEXy5JxC
rQFgG15F3/4Nb77S8Ma1GPJZgWrjAsuSzyqfg9A/i57hQsOzSN8iw7OoxhfrnJVbS/q3mVCo
jWotBWJ1J2U5gWktUSt3UbijTYqv7ApduijYHexI0W7S13vUdtOsttyeQemCLDB30YxY6Oxg
PFjVPqU9I30KVX1Mqj7eDPUxMfp4Gdt09HSGI2lrM0LVRlC1KRyUNiP7WSczjYp1NCoaQvt0
x2PRzkHZp3iI7ZOZRqx9riNH/ft5+7GvaE+ew6XvdqAbHO4dh/Ec7ntke5R3rznd9dNzuEql
c2N+7AaThHzdsOSuf2TSYlO56x9JZhiUWC6qEZHndNPr+kdRnAswnezIJE8Lup92coWJKONK
0nE02RzynRWASkEJFsjlALTMSl4/2yjT+1kCiZuwBJqV8F4B9IuPJpULTF04/gysXwE+RhO1
O4S1+NgG/5UJRbMFMlGywnwQh9eg9Efsb05OE005bRD34jhoCm2JpU89LrPKxyjOQascB1XN
p2w78DEmqyOkfnqiSaa99tdxnAWorS4MqDoXFGk6z3VqOndYimaPAGvgUULAL250hKRpsMtb
uSrUNiMK+7+INH1ZdwU5nJbcJEvKIjz1oLunszMYWylJ88KLI+H2cCtkwR0rpTayMDM+VSqb
KzVKvgpfzamS9J1IaLIUjUnx5dHJ8WC4A6ZMEpoqSfFyqa29ObpcWhReLIW7pfiSkJpOK4pw
TigYkR6W5p11juzPk3U0CJ8uSUarQyWpoWYivX4yHImHYlANSVLWssprDKV4FEbr7IIBUMtY
OAgjw6ubymc2Rcqlme1tgzTIq7wkjpOS0EYxI6nxUYK0oNpsxhLShigsIR82XCPhdaPJL5Ce
BEfsPthANcDx2GzIr6PgBLAeN+LIMVEKtsB8tsPtLXj8GbyqQJBfyCoVxoAawQWmCQ4wWxgB
vitMRNPbAjuGywfazwfZKX2Vl7hGk3Ar1kRmDyhvH5BfG0LnGshY0UFalolkgIDcZSeQuaX1
5Do3caeUkjzRdH8JSXc7OS4g06ylJN3PiB5oLFsgyGkX4TsEYAwZFdaQxh3pPk2QdUENP2pO
R5B0vyuQXwAmY9lR1IwN3WGMJDahZ3nS7DAexZF29GtYr8O93wa1wwB5coeBOoZDsGMw8pqr
nY1Z7mxQT9pnTzSrHY9XTgeZfa8o4TjoxYUuy9yUaSLfl2TeNEvRrc8s64Zuf6u9RT3udcjH
aCpwf1Ffc6o0Ub57nXPV+IFRfVg3TPB8QNPZF2gegf0L21NNxemwTNh4JfFgXNd8Pv9pUC4O
dc9Xm574GQ0VDdUNsNE5o7rOX+Grq4aNCKqX1fV10rlnVNVWVlT76nGYv7amGgb5q/wVVVVV
clBVtQ9eVFuNGgl/Ra2vyldRW1fvq6qorK8ql/yV5VJVDcq51ofzfXV43Y5+07UdGDddyv9C
UA6vm0JNMpwJq1ETbEpmw/BzYNW9iPrB9DZYjVfAa66HTcFGuN1LkcAtMN42iPtgbr+D1z6B
/TD0ZMFoUk1HE9qO9C2nmq4pVHN1JtBeuGki55Xmykyaq3PIHjVXF5GmKp9MZRaRtFaQvAqI
FzqfNFEbybGXeEWtpFnaQtIZSQZjVtLs9BHdS4gvzzzAxLUjC4R2GJhssI0TJ7TfJkJLyymY
wAopwxSqWqJLaEsIoaX9PsdCaEcbElr6eqX2tVMNH01oSzih/RoJ7UyNRs3IARo1wyB8Zu4T
Wl4S3wChLeGE9rgktKOpZRB0h1GiQ2hLBkdob8G9331ah0EILWpM18IOINVYDI+/7BQ59AL1
OEGOkdn7KELbkgahLaEI7VOE0KKOapNd7qjQotUdYq/aCbUU7x9wzCjlyWNGZN5DeRoJ31+i
kfC+SkRoXybL3dJkgMQxyHBAEuarqKyt9UW6z43SBNBf4a+swwQQMjtfVa1MAKv91YjtVdbA
07V+me35Ie2DQT54WFlDGKDfXzkZRm+ob/CjdsJXUVXdgChfZX1tQ01FQ10tpIEN5VJldRIF
fXWY3pd+Y7YnDYpbDJ9fM/BTP4I+HTYmzfCK2XCbAyvfhRTFbYUVeznkP+tgg7ARPuEPAG0c
+giM9xyslH+AlXXXgBS3mOhbQTVmftKg2MgqMCup5MpHnpQGzEQahTkUX7uQ4mutFF9bTvG1
dSRM4Wtesj1A8iwmS20VvvYcyX8UWVwqEvvuSoPiOrNHcXPZZINtrjjF/Tb6bD2YynrAJKFA
NyyZ4pbqUtzSIfLZjjGkuHS+FvKMtpMrkiluKae4XyPFbdKI1Vk5QKzOMghvyn2Ky0viG6C4
pZziHpcUdwxFcekOo1SH4pbmDsXtxBQ3tR8Y6VNmlvVBx3vJMaK7K8QNakNfYFmrdgC+vIJZ
A40Z+/I0t4g0WtO5r0rz2QaqEcV9nbx9lSYVJGs7GSpIwnwVDdXVdclUENbBWkjZMBms91XU
+2sVNlhbJ7NBGAi5nhxYX1NVjwMnY9dlXYNME30NdVXVMKjSV1kjU0J/fX2DTP58/uqqiqqq
OkQI0YZCq2sI0R3Od6ffsO0bIrqreXtDMP4quN0A+dBd8JpHcaWW5VnYkOyE174Ir3vpG6G7
HtKAhUj6HvLmdDFpwG4gPG4EeUN2BNHvUZJ2MXmbU+FuOyn35IuUe/KllHTXm5AX5Gf+KhIq
Nzv1ckWu22ew7VQh7tJi1vXOVe5GjxnbxQLb7ErQBq+yQg7jElF3YILYAv/kKYLbQTWxkbKG
e5ZdYSDJkwjhgMJM0Lki5uvcI7Etrdhi6O6PkK8Kusmxl1j3CPmNUSW8iIpfTCx+BH+bewfQ
PpFIp3qELLSnP6dK56R3ns5d73zhANcXDZA/rbne+Z/i1wqtpKRNFItUtmI1RvJXwpVnchQm
Z/pyaKq8Lwlo2G6T1yYLeKAwFg5k+qWwf7XdHmCDCii8VZQHWCiFceBE+ATp6XAxm0Lfon4p
eHAKJ4Hx4GRwN+bSpgG+jzKUsbYkXCCdj+akkvvSyim9dJ0ZpYtibwmw9yCknZeQUV7pp5uX
Ubp5OvdgSjsvU0Z5pZ+uK6N0XUn3IAyDZ0kYBs+SMAyeJdMweJZMw+BZMuXsszQxsYqaDtBG
A98Zc/CxH5y7dCoaZNtt2l3L9vfhrz2x12h7E5WvlXn3TxktAXW0sxzf1WS8bEx+jsqFfPxl
aRmXC+WCh8ILTOWCl8JrzOVCIYW3iuVCEYXftJQLxRj/kHkFVBF0p9cSfX9E9muB/AseE4l1
xhqOW2TrLExhnQmB/uVp6vckD2wdfe2RJgNpf0JOaz8OJI8ylSdTGyUO9GTS7YGgXxkMtQeG
2hcYPjlA1f7ElCPerWJmtle0F4ZAe2Pba9pLOa39SUCfXfSl8eTMMnzuh+DJwZoMpP34IbV9
5rV2cLY/OUe1L0koXn1l6cl49dMsytjlZOBNGvPI6CSg+oOpb0NIiXH4/G7xsON294PeQ6Lk
XOVe65VnW6Z50Pef3lDnQ1DvLqdTAMh3cnBvj97vKEnRl68hd6A/TlBy07tSCsgaOkDC2u3u
tbV4NltvcXfYGj3rrVe519jmewRYOqyGZYle3LMLhOGjmq14mfekHn3un9Pz6VQ7sAAxZTQH
tJgJ7ABteAaqXMBzR3bN2k48l8TKqWqat2HXioe2gkmb+VOWgQs6aSSJhXnoRKD9/EXSL/Lg
mGadqy1UXGVKxtnv8QGgLOBT1ferR4MpdJBisKgV+oO2G/Oetbd49tqezNtgb/Q8Zbsjb6vd
uNDR0ghPv0K/66vUhY4mi+wwolbomzZtVje60M1ZL3Qh80I3GxS6kKOF/rp9s/ugo8Vz2L7D
/byj0fOOfav7TYdxoaOi8/Yr9GVHUttxxdv/gjXdRBV6IpFQN7rQxawXuinzQhcNCt2Uo4Uu
Oie4i/JaPGXOZvchZ6OnwOlz2/OMCx15eQv7FfrswynNGOjZ8gUsdDNV6Pv27VM3utAtWS90
c+aFbjEodHOOFrov7y13wNXimZ8n5I91NXoa8951V7uMC90JcVG/Qh/3ZUozthx44RAsdJEq
9JaWFnWjC92a9UIXMy90q0Ghizla6Je47nZ3uFs8CddOd7O70bPE9bC7xW1c6HkQF/cr9I8+
T13TV+1EzbszRZ8u28cJbZvtQndmXug2g0J35mShm8A263xHvXuu88/WFY4id7nzU2uv47Cr
CKrnE9hCHw+Sv/tOMQ41lyJK+ylYv7VH5TtbC2NdjlOsJucnJbx4PhE9PqPlN4zlmTy8AsHQ
Mz+ZfAdQIXfyeizZNe0ihd0Ga+dS+H9SIC0TSvomxG+2QHOkNuE99oXepryZhX+0X+kdnycV
vm2/2evMsxcOnQnnmWUTzjOjD933N6Ebm9DKmBC1Tgvmh+MdoWR7uQZtLzGFvdC9p7ZXwDLB
5bPe7m6zNLtc1lXuKywtro8ti9yDtdcas2Kva8gjd4PBI5dvYK+Lib1KqXEAbS8rziMbVpNT
TmW13+a7XL2eZ91v5/tcHZ4N7i/ym2GHnIBWqzQPxmrrnYrVtgHZamgFtJ7VPNhqNsZqqCm8
2D+g2VAm2THbemcqs9nBbrHEI8+fNHrk+RO0R/MnyZ2aPD/jYHxACJ2GtRgD+pt1sHMrSJPU
2h+wHHbcam3xOKySczmMj+Zj0N6Uofbjhlh7RRN97UsCCbzGaq3wA7xG6bTpHcHWpVIw0iZd
tCQcD8H+WXk98mogWbUOUneeNA3HJD3lhUYRiCgi3oCGkQij/cGDB9URRq7EGY7Cy4cLFy6Z
yHsJkXRp74OAWaNkaHxylJuHC5eM5H1QILKLCo8Ow96Zx+FxeJz042h9q4nqW7mleBwe51hq
kZnXIh6HxxlkLRI5z+PC5Rh5nlKLLLwWceEyyFpk5bWIC5dB1iIbr0VcuByTvBdIBK5RV4dp
n7X5lfqjmPKM/mb1o9PakhD5PSMHc9YO1KWR+CzC3kB9Qg5z4DWUc2PRy0KtcSkcaY9KfoPv
4tD7NOXrW1wJjL+Tko3v4sjLpRRbaO8QTAp0qj9hrH6GuG/k6qjrNSGC7X/Wiq5QLNwZisSl
mcF4CETxu26+uim+6imVvkofiODVjlS0WTNhJGzFCF7hc240HloUjS5lTti1UtQC3UxCoZh2
xiFHj0dbox1aKN4RtA5/FZUUHnovcuoLu3efqWcl7RGtD5gTgSTrH4sIgf8HAAD//wMAaPGr
pg==</Template></GraphPadPrismFile>
