# Supplementary material for: Regulation of stem/progenitor cell maintenance by BMP5 in prostate homeostasis and cancer initiation
Source: eLife journal article supplement (doi:10.7554/elife.54542), 2020-09-07
Supplement: fig3-data1 [file elife-54542-fig3-data1-v2.pzfx]

<?xml version="1.0" encoding="UTF-8"?>
<GraphPadPrismFile xmlns="http://graphpad.com/prism/Prism.htm" PrismXMLVersion="5.00">
<Created>
<OriginalVersion CreatedByProgram="GraphPad Prism" CreatedByVersion="6.0.1.298" RegisteredTo="      " Login="Admin" DateTime="2020-07-16T14:08:46-05:00"/>
</Created>
<DefGraphButton ButtonID="101"/>
<InfoSequence>
<Ref ID="Info0" Selected="1"/>
</InfoSequence>
<Info ID="Info0">
<Title>Project info 1</Title>
<Notes>
</Notes>
<Constant><Name>Experiment Date</Name><Value>2020-04-14</Value></Constant>
<Constant><Name>Experiment ID</Name><Value/></Constant>
<Constant><Name>Notebook ID</Name><Value/></Constant>
<Constant><Name>Project</Name><Value/></Constant>
<Constant><Name>Experimenter</Name><Value/></Constant>
<Constant><Name>Protocol</Name><Value/></Constant>
</Info>

<TableSequence>

<Ref ID="Table0"/>
<Ref ID="Table11"/>
<Ref ID="Table17"/>
<Ref ID="Table21"/>
<Ref ID="Table27"/>
<Ref ID="Table31" Selected="1"/>
<Ref ID="Table37"/>
<Ref ID="Table41"/>
</TableSequence>
<Table ID="Table0" XFormat="numbers" YFormat="replicates" Replicates="1" TableType="XY" EVFormat="AsteriskAfterNumber">
<Title>Fig3A</Title>
<RowTitlesColumn Width="39">
<Subcolumn>
<d/>
<d>1</d>
<d>2</d>
<d>3</d>
<d>4</d>
<d>5</d>
<d>6</d>
</Subcolumn>
</RowTitlesColumn>
<XColumn Width="81" Decimals="0" Subcolumns="1">
<Title>Passage</Title>
<Subcolumn>
<d>0</d>
<d>1</d>
<d>2</d>
<d>3</d>
<d>4</d>
<d>5</d>
<d>6</d>
</Subcolumn>
</XColumn>
<YColumn Width="125" Decimals="2" Subcolumns="1">
<Title>Krt5CreERT2Gata3f/f</Title>
<Subcolumn>
<d>0.1</d>
<d>0.79</d>
<d>0.86</d>
<d>1.19</d>
<d>1.47</d>
<d>1.53</d>
<d>1.66</d>
</Subcolumn>
</YColumn>
<YColumn Width="173" Decimals="2" Subcolumns="1">
<Title>Krt5CreERT2Gata3f/f+Noggin</Title>
<Subcolumn>
<d>0.1</d>
<d>0.56</d>
<d>0.27</d>
<d>0.13</d>
<d>0.09</d>
<d>0.01</d>
<d>0</d>
</Subcolumn>
</YColumn>
<YColumn Width="81" Decimals="2" Subcolumns="1">
<Title>Wild type</Title>
<Subcolumn>
<d>0.1</d>
<d>0.55</d>
<d>0.43</d>
<d>0.21</d>
<d>0.07</d>
<d>0.01</d>
<d>0</d>
</Subcolumn>
</YColumn>
<YColumn Width="111" Decimals="6" Subcolumns="1">
<Title>Wild type +Noggin</Title>
<Subcolumn>
<d>0.1</d>
<d>0.129444</d>
<d>0.038889</d>
<d>0.011111</d>
<d>0</d>
<d>0</d>
<d>0</d>
</Subcolumn>
</YColumn>
</Table>
<Table ID="Table11" XFormat="none" YFormat="SDN" TableType="TwoWay" EVFormat="AsteriskAfterNumber">
<Title>Fig3A growth rate</Title>
<RowTitlesColumn Width="109">
<Subcolumn>
<d>growth rate (k)</d>
</Subcolumn>
</RowTitlesColumn>
<YColumn Width="243" Decimals="4" Subcolumns="3">
<Title>Krt5CreERT2Gata3f/f</Title>
<Subcolumn>
<d>0.1969</d>
</Subcolumn>
<Subcolumn>
<d>0.04995</d>
</Subcolumn>
<Subcolumn>
<d>7</d>
</Subcolumn>
</YColumn>
<YColumn Width="243" Decimals="4" Subcolumns="3">
<Title>Krt5CreERT2Gata3f/f+Noggin</Title>
<Subcolumn>
<d>-0.2372</d>
</Subcolumn>
<Subcolumn>
<d>0.2272</d>
</Subcolumn>
<Subcolumn>
<d>7</d>
</Subcolumn>
</YColumn>
<YColumn Width="243" Decimals="4" Subcolumns="3">
<Title>Wild type</Title>
<Subcolumn>
<d>-0.2101</d>
</Subcolumn>
<Subcolumn>
<d>0.2094</d>
</Subcolumn>
<Subcolumn>
<d>7</d>
</Subcolumn>
</YColumn>
<YColumn Width="243" Decimals="4" Subcolumns="3">
<Title>Wild type +Noggin</Title>
<Subcolumn>
<d>-0.4916</d>
</Subcolumn>
<Subcolumn>
<d>0.1975</d>
</Subcolumn>
<Subcolumn>
<d>7</d>
</Subcolumn>
</YColumn>
</Table>
<Table ID="Table17" XFormat="numbers" YFormat="replicates" Replicates="1" TableType="XY" EVFormat="AsteriskAfterNumber">
<Title>Fig3B</Title>
<RowTitlesColumn Width="39">
<Subcolumn>
<d>0</d>
<d>1</d>
<d>2</d>
<d>3</d>
<d>4</d>
<d>5</d>
<d>6</d>
<d>7</d>
</Subcolumn>
</RowTitlesColumn>
<XColumn Width="81" Decimals="0" Subcolumns="1">
<Title>Passage</Title>
<Subcolumn>
<d>0</d>
<d>1</d>
<d>2</d>
<d>3</d>
<d>4</d>
<d>5</d>
<d>6</d>
<d>7</d>
</Subcolumn>
</XColumn>
<YColumn Width="125" Decimals="6" Subcolumns="1">
<Title>Krt5CreERT2Gata3f/f</Title>
<Subcolumn>
<d>0.1</d>
<d>0.295652</d>
<d>1.076087</d>
<d>4.773913</d>
<d>31.30435</d>
<d>227.1652</d>
<d>428.327</d>
<d>651.2557</d>
</Subcolumn>
</YColumn>
<YColumn Width="177" Decimals="6" Subcolumns="1">
<Title>Krt5CreERT2Gata3f/f+K02288</Title>
<Subcolumn>
<d>0.1</d>
<d>0.054783</d>
<d>0.074783</d>
<d>0.114348</d>
<d>0.66087</d>
<d>0.457391</d>
<d>0.149391</d>
<d>0.017565</d>
</Subcolumn>
</YColumn>
<YColumn Width="81" Decimals="6" Subcolumns="1">
<Title>Wild type</Title>
<Subcolumn>
<d>0.1</d>
<d>0.074773</d>
<d>0.165455</d>
<d>1.045455</d>
<d>1.714929</d>
<d>1.971593</d>
<d>3.5138</d>
<d>2.553812</d>
</Subcolumn>
</YColumn>
<YColumn Width="115" Decimals="6" Subcolumns="1">
<Title>Wild type +K02288</Title>
<Subcolumn>
<d>0.1</d>
<d>0.045909</d>
<d>0.036046</d>
<d>0.028302</d>
<d>0.21185</d>
<d>0.657805</d>
<d>0.33741</d>
<d>0.059021</d>
</Subcolumn>
</YColumn>
</Table>
<Table ID="Table21" XFormat="none" YFormat="SDN" TableType="TwoWay" EVFormat="AsteriskAfterNumber">
<Title>Fig3B growth rate</Title>
<RowTitlesColumn Width="109">
<Subcolumn>
<d>growth rate (k)</d>
</Subcolumn>
</RowTitlesColumn>
<YColumn Width="243" Decimals="5" Subcolumns="3">
<Title>Krt5CreERT2Gata3f/f</Title>
<Subcolumn>
<d>0.6338</d>
</Subcolumn>
<Subcolumn>
<d>0.08464</d>
</Subcolumn>
<Subcolumn>
<d>8</d>
</Subcolumn>
</YColumn>
<YColumn Width="243" Decimals="5" Subcolumns="3">
<Title>Krt5CreERT2Gata3f/f+K02288</Title>
<Subcolumn>
<d>0.05974</d>
</Subcolumn>
<Subcolumn>
<d>0.1868</d>
</Subcolumn>
<Subcolumn>
<d>8</d>
</Subcolumn>
</YColumn>
<YColumn Width="243" Decimals="5" Subcolumns="3">
<Title>Wild type</Title>
<Subcolumn>
<d>0.2975</d>
</Subcolumn>
<Subcolumn>
<d>0.08863</d>
</Subcolumn>
<Subcolumn>
<d>8</d>
</Subcolumn>
</YColumn>
<YColumn Width="243" Decimals="5" Subcolumns="3">
<Title>Wild type +K02288</Title>
<Subcolumn>
<d>0.1508</d>
</Subcolumn>
<Subcolumn>
<d>0.1947</d>
</Subcolumn>
<Subcolumn>
<d>8</d>
</Subcolumn>
</YColumn>
</Table>
<Table ID="Table27" XFormat="numbers" YFormat="replicates" Replicates="1" TableType="XY" EVFormat="AsteriskAfterNumber">
<Title>Fig3C</Title>
<RowTitlesColumn Width="39">
<Subcolumn>
<d>0</d>
<d>1</d>
<d>2</d>
<d>3</d>
<d>4</d>
<d>5</d>
<d>6</d>
</Subcolumn>
</RowTitlesColumn>
<XColumn Width="81" Decimals="0" Subcolumns="1">
<Title>Passage</Title>
<Subcolumn>
<d>0</d>
<d>1</d>
<d>2</d>
<d>3</d>
<d>4</d>
<d>5</d>
<d>6</d>
</Subcolumn>
</XColumn>
<YColumn Width="129" Decimals="6" Subcolumns="1">
<Title>Krt5CreERT2Gata3f/f </Title>
<Subcolumn>
<d>0.1</d>
<d>0.46154</d>
<d>0.6321</d>
<d>1.2963</d>
<d>6.19753</d>
<d>15.3086</d>
<d>24.7037</d>
</Subcolumn>
</YColumn>
<YColumn Width="199" Decimals="6" Subcolumns="1">
<Title>Krt5CreERT2Gata3f/fBmp5SE/SE</Title>
<Subcolumn>
<d>0.1</d>
<d>0.51149</d>
<d>0.49009</d>
<d>0.31715</d>
<d>0.5846</d>
<d>0.87535</d>
<d>0.86</d>
</Subcolumn>
</YColumn>
<YColumn Width="81" Decimals="6" Subcolumns="1">
<Title>wt + Bmp5</Title>
<Subcolumn>
<d>0.1</d>
<d>0.2121</d>
<d>0.89516</d>
<d>1.33065</d>
<d>6.58871</d>
<d>13.0805</d>
<d>18.6171</d>
</Subcolumn>
</YColumn>
<YColumn Width="81" Decimals="6" Subcolumns="1">
<Title>wt</Title>
<Subcolumn>
<d>0.1</d>
<d>0.66961</d>
<d>0.557</d>
<d>0.39834</d>
<d>0.70616</d>
<d>0.51435</d>
<d>0.27507</d>
</Subcolumn>
</YColumn>
<YColumn Width="82" Decimals="5" Subcolumns="1">
<Title>Bmp5 SE/SE</Title>
<Subcolumn>
<d>0.1</d>
<d>0.37599</d>
<d>0.31545</d>
<d>0.20367</d>
<d>0.10278</d>
<d>0.05258</d>
<d>0.05258</d>
</Subcolumn>
</YColumn>
</Table>
<Table ID="Table31" XFormat="none" YFormat="SDN" TableType="TwoWay" EVFormat="AsteriskAfterNumber">
<Title>Fig3C growth rate</Title>
<RowTitlesColumn Width="81">
<Subcolumn>
<d>growth rate (k)</d>
</Subcolumn>
</RowTitlesColumn>
<YColumn Width="171" Decimals="5" Subcolumns="3">
<Title>Krt5CreERT2Gata3f/f </Title>
<Subcolumn>
<d>0.6865</d>
</Subcolumn>
<Subcolumn>
<d>0.07766</d>
</Subcolumn>
<Subcolumn>
<d>7</d>
</Subcolumn>
</YColumn>
<YColumn Width="171" Decimals="5" Subcolumns="3">
<Title>Krt5CreERT2Gata3f/fBmp5SE/SE</Title>
<Subcolumn>
<d>0.2072</d>
</Subcolumn>
<Subcolumn>
<d>0.06165</d>
</Subcolumn>
<Subcolumn>
<d>7</d>
</Subcolumn>
</YColumn>
<YColumn Width="171" Decimals="5" Subcolumns="3">
<Title>wt</Title>
<Subcolumn>
<d>0.02221</d>
</Subcolumn>
<Subcolumn>
<d>0.09746</d>
</Subcolumn>
<Subcolumn>
<d>7</d>
</Subcolumn>
</YColumn>
<YColumn Width="243" Decimals="5" Subcolumns="3">
<Title>wt + Bmp5</Title>
<Subcolumn>
<d>0.5935</d>
</Subcolumn>
<Subcolumn>
<d>0.08381</d>
</Subcolumn>
<Subcolumn>
<d>7</d>
</Subcolumn>
</YColumn>
<YColumn Width="171" Decimals="5" Subcolumns="3">
<Title>Bmp5 SE/SE</Title>
<Subcolumn>
<d>-0.1538</d>
</Subcolumn>
<Subcolumn>
<d>0.1411</d>
</Subcolumn>
<Subcolumn>
<d>7</d>
</Subcolumn>
</YColumn>
</Table>
<Table ID="Table37" XFormat="numbers" YFormat="replicates" Replicates="1" TableType="XY" EVFormat="AsteriskAfterNumber">
<Title>Fig3D</Title>
<RowTitlesColumn Width="39">
<Subcolumn>
<d>1</d>
<d>2</d>
<d>3</d>
<d>4</d>
<d>5</d>
<d>6</d>
<d>7</d>
</Subcolumn>
</RowTitlesColumn>
<XColumn Width="81" Decimals="0" Subcolumns="1">
<Title>Passage</Title>
<Subcolumn>
<d>1</d>
<d>2</d>
<d>3</d>
<d>4</d>
<d>5</d>
<d>6</d>
<d>7</d>
</Subcolumn>
</XColumn>
<YColumn Width="186" Decimals="6" Subcolumns="1">
<Title>Krt5CreERT2 Gata3f/f scramble</Title>
<Subcolumn>
<d>0.1</d>
<d>0.07534</d>
<d>0.299947</d>
<d>2.19214</d>
<d>11.45403</d>
<d>36.21727</d>
<d>85.81918</d>
</Subcolumn>
</YColumn>
<YColumn Width="181" Decimals="6" Subcolumns="1">
<Title>Krt5CreERT2 Gata3f/f shBmp5</Title>
<Subcolumn>
<d>0.1</d>
<d>0.026828</d>
<d>0.018005</d>
<d>0.060889</d>
<d>0.159987</d>
<d>0.400532</d>
<d>0.059589</d>
</Subcolumn>
</YColumn>
<YColumn Width="81" Decimals="6" Subcolumns="1">
<Title>wt scramble</Title>
<Subcolumn>
<d>0.1</d>
<d>0.009429</d>
<d>0.057063</d>
<d>0.381906</d>
<d>0.423304</d>
<d>1.318078</d>
<d>1.566518</d>
</Subcolumn>
</YColumn>
<YColumn Width="81" Decimals="6" Subcolumns="1">
<Title>wt shBmp5</Title>
<Subcolumn>
<d>0.1</d>
<d>0.004951</d>
<d>0.018333</d>
<d>0.056471</d>
<d>0.17549</d>
<d>0.122745</d>
<d>0.08631</d>
</Subcolumn>
</YColumn>
</Table>
<Table ID="Table41" XFormat="none" YFormat="SDN" TableType="TwoWay" EVFormat="AsteriskAfterNumber">
<Title>Fig3D growth rate</Title>
<RowTitlesColumn Width="81">
<Subcolumn>
<d>growth rate (k)</d>
</Subcolumn>
</RowTitlesColumn>
<YColumn Width="222" Decimals="5" Subcolumns="3">
<Title>Krt5CreERT2 Gata3f/f scramble</Title>
<Subcolumn>
<d>0.9515</d>
</Subcolumn>
<Subcolumn>
<d>0.04859</d>
</Subcolumn>
<Subcolumn>
<d>7</d>
</Subcolumn>
</YColumn>
<YColumn Width="171" Decimals="5" Subcolumns="3">
<Title>Krt5CreERT2 Gata3f/f shBmp5</Title>
<Subcolumn>
<d>0.2026</d>
</Subcolumn>
<Subcolumn>
<d>0.2333</d>
</Subcolumn>
<Subcolumn>
<d>7</d>
</Subcolumn>
</YColumn>
<YColumn Width="243" Decimals="5" Subcolumns="3">
<Title>wt scramble</Title>
<Subcolumn>
<d>0.529</d>
</Subcolumn>
<Subcolumn>
<d>0.1032</d>
</Subcolumn>
<Subcolumn>
<d>7</d>
</Subcolumn>
</YColumn>
<YColumn Width="243" Decimals="5" Subcolumns="3">
<Title>wt shBmp5</Title>
<Subcolumn>
<d>0.1526</d>
</Subcolumn>
<Subcolumn>
<d>0.1454</d>
</Subcolumn>
<Subcolumn>
<d>7</d>
</Subcolumn>
</YColumn>
</Table>

<!--Analyses, graphs and layouts as compressed binary. Don't edit this part of the file.-->

<Template xmlns:dt="urn:schemas-microsoft-com:datatypes" dt:dt="bin.base64">eNrsvQlglNW993+emclKZA0YFsOQsBNCFKi4EahsfdkCRMS+eDUkk2QkJJiFEJUQW0UU/LOk
Lm1vfb1dLvG2VW9bqpSk4MXW9LpwgylQkKrIVcoiAQLvFfg77znP/M7kzMMzyUwyQ4b4Pfrh
Oc/znOf8zvI733OeJUnG3TNmzFw4dYJWFccY26xt1iz83xy2xPIvbCg/ssTCvILc1zg/SmBM
7FqqMkYwNo3HYjl5nAhOM08ymG/7cWKUHKIJG+Wi0fFunF6cvpyBzH3tMM4ohoCAgICAgHC9
hCia58W64gaa23vTegABAQEBAQEh/IOV7umjDPfyCAgICAgICAgICAgICAgICAgICAgICAiB
BSv7Nv/3VB/G6vszttDK2BxbINe7ePhI01iE+ws7G/tBmFY0skp8RDiYRekVdoepxc6sglYq
LD5N7K7sb3Z/RWi1aEmUj/vAYkdxTlZhlk/bIzg9W81H/8CRLapYsayogLWaTx/TfHpTPlY9
n3udhXk5nJJW6jXINB8L5eNukkznCkeJfZ6j3L6waEVW4VX5JDP3Rxe+yyNe56xjU3b+2wdv
7/+vdz9g5vkM9dk+sjyRej4im3c/eO+/WSv5xLWaT5QnH7047S5PtH7g7qKyYqejWLQQ85WP
eX/dTPm4X3NlFjuWlWXnO0rtcxcxk3zEB6o9WvWfWL1eetu0ko+9zXp10w9M+XZWaVZhHgs8
H9nvce5+1weY/Z5CZ3ZRjkNk5h3GtDm+bmjxH3flTPNpu9+7u/P54Kf1pxv+9IdDPvIZ3WY7
99DzmVOW7czJss8szirMcbCr8zGGzVpL3J1PT2W82zOdeY5iZpKPaOderbYznW0jn9aCO5/e
evzbRUXL7VMLS50Pl2WZ5TPSZ3/J8vTRNdHd7d8uKsixf6c0q8CZbcjnFJ801P1ai7E88Uo+
87KKi4vKmUk+zYZ8qDxRLfn0dY+vrHw+zpnPfIz6TOVR+t39Odnd/NplxU7mbz5X+8+N7nYu
LivJty/KLnau5EMsk5nlE2vIx6Xn823KJ8E9TudmFeSVFdpnFpXmi8Jkm4yv1v25v35gAWs9
HxEaE9zT3fFnXa4HMz1zP+UzQO33gqzs5cwsn3Nt9vtA8sOcokInbxn73UV8hBWWOHK88hnO
vD8QuNoPB3n8meuyfT53xEWlFQUO5p1Pk6E8SyzGfG7SD8xyFKxylDqzs5h5Pm2P90TqL2d2
cVFJUW6p/b6sWQ4nM+TTmv5ETlmjz8rixyEqPbEf0Ezk7gz3nua1Z/Has3rt2Whvgx6r4jzH
GqPcbSuOt7+0+CELBAQEBASEzg5iYv4xk485/sxWWdwrAQSEaxssU26rci+yY/R7vHlFhQXO
Qnuus9RelGuf4cwbP5Xf+QzSvB9F6jcaFrP8vplr0NvpLjNCH9suAb+PeVO/K7T4uOYOz72B
CHfq9/Jyna8p9wlm4TWWQnekamprK1fcxW7xPEX8mu9/Tdd9TectStxKcZH2ZbaecpdqJa/+
2sSKplwp+t54XlqRfW88b/W6/urzJzz1lioq622j1o9kLT+CJlozXb/ztDDlh86jFR8W94B6
uukPl2WVOosKlQvkRcwW77mFc1/QS3+EsazAIcZIsaOkrKC0xGBJb60EZrd4XShKd3dZ8SqH
WbkSWLS1zdSeEN1yt2jRU+t5mCeM8DdhpL8Jo/xNGO1vwpirE85g00TJh+xmbx2EUiMgdNVw
3KqoZpR7+4ByrtUVjBIX8uFy2WjeUOcPITA0r0zZNMUrg93LxP7LP/zhK+neOSdMMdnfPf6r
MzOVrTG0dd4kNKW3lUIKo9jaDPMi8zHrM2U9sYddihRvCuJ4K8dHfI+9p6XqkwLzrEBe+sva
te49GbN4YlZPzOaJRXhikZ5YlCcW7YnFeGKxnlg3gzXvEiCGGGKIXctYlSf2uMnZa6uJcZ7Y
DZ5Yd0+shyfW0xPr5Yn19sT6eGLxnlhfT6yfJ3ajJ5bgifX3xAZ4YgM9sUGe2E2eWKInNtgT
s3tiIz2xJE8s2RMb6okN88SGe2IjTHIZ5YmN9sTGeGIpnthYT2xmVYpyry23Y3qyWE25f1Rn
0llVxcraQp9N9Rlda3vO1tPp323wNcVfWp/b1VWCHq+gLxEsbvdzuf8t0b88aLlrrUpXZ365
/x392vvuui9ttGP1ypHLRy8ZdUMsy9Bvt6avXllU6CgsFe+D84qLykvz7Q55y/sbd4v8ls0R
97X5zhLPKXt2VqF9mcOen1WcYy8tEo+FUu2ZxRX23LKSEmdhnr3cyTMqzXfYnYVOPe9VWQVl
DntuUbF9dir7nd6sogYL2O/k2g4BAQHhOgkL3eK4SH82dl8aW84l0uubIhn+3fPlhwhv07Nf
TYizex7q9v57cya7oxvZqRj3PJSZVcZOCg1fHMnybAfKX/xBYzmX8JvHzR6zZOySb2qj3zxu
+Tfb62abHRT+Mq2obFmBmHnFp8DM4y9z5o28ZdQ312cKCkX1l8NfEBAQEDo3uAyf8X4Ds7EY
eEz/Tn8z28Ie5HfkSZxJ7BX9bbbxh508q0AK6i1z4FfMmrK4KtZTIhHuNV29LjE9eh999+9+
lrEjXY/Ze/X6l/Qa/YmEpZUW0HyW1xjUdXOo8l1M7aC51+Ttb4eWJ0jXdTtY3M+YvvHtYOV5
W7/R7TBzyvP0BdgLXJ3cIZe2r0UwdpGffF9vH29b4idMWnuqGLTwYlVvXX41bnYQs3heB6e0
9WDzhlRPU1TrDROQ1Sk7qsT2D6wnWZSfCNnzHQUrW7nymjQKbtU7LUwR/X/7wukzH1B6+gF3
T39TbtV3TPmH/gOeop6bI7kY8IH2/JQfesbbv3oJ5CxOGgnTNlbmQ8juSwvyeEovHp7dO/ao
5w1Mi2nNkHJ5sIfy6//SZ2P2LfLlj6aYNtZcPAAMqunmn45+8tSC+ClyHdpi2vghjbeDBsH0
faWHGx1j4si0VTGtLp5j3H0dXNMl/9Nv7MTLu2Vfx/g2zfs6uKb/qn2rV/NW+fGQppi2GabM
oNd6dfqJ//jJ2vdkrbUW0xEG00Gv9ZfvTJvzyyf+XdZaMR1pMC08PKimX/zJw3nzX4yWHq6Y
jmr1aWkQTP/xyANR0+M06eGK6WjDzV/Q+/rlzK333NV8Sva1pcV0jMF00Pv6d0WWHZMaGmVf
K6ZjDaaD3tcvPNP7UNTtY2VfK6a7GUwHva/n/+Adbfi3h8q+tphLipgFpznyih2OEv0nJngk
p2hFUFaCUsNZnG/TC+0lPMdiBwuW6d9Zsv/vppP/kH3diumpy0qKCspKHfZFZStE1RfpBSlp
v+kPN+0fZt3/VzJtacX0oorU1SyYpmf++dl/++SN/yLTVsV0nHqL5x7XwTWd323T9szvugeX
5rVKucFgmo/r4JrOfe/3lyuXfrDLbURdpXQ3mNZXKcE0bbvlr6/0PtJzN6NnMi2mexhMe4/r
IJj++JUDh3c+GEWmzVYpmukqJQimH/h849BR9+6RfR3j27S3hgfBdMKNv52yNP59Mq2uUnoq
Da6FotZT/u1fV2+I+Q25mbpK6WUwHfRavznxneorM09ID1dM9zaY9p65gmDa/R3ZGfqCUF2l
9DGYDrqHe5tWVynximlLKPr69U9+NnTdjz+XHq5Mmn0NpoPe193+z4Exj4zfLz1cMd3PYDro
ff3PuXGv/q9Hz5ObqauUGw2mg97XE1b02HFIO0mmzVYpmu9VSsdMq6sUzXSVovlepXTM9LLV
W/fP/qd9sq9bMR30Vcox2yPn//vLt8m0pRXTwV+l3GcdPmn4O2RaXaUkKAvhkKxSRn7/naoL
W92Dy+K1SulvMB30VUrtwkUTHv/v/9zlNqKuUgYYTAd9lVI4Zt3BW2L67Gb0xqTF9ECD6aCP
6+JVE3q9nh1Lps1WKZZQrVLefTVpXFHqn2Rfx/g2HXQN/9n7N75b9N5/kml1lTJIafCQrFKq
/vb8XQtf+g25mbpKuclgOui1vn1gN9fJc19ID1dMJxpMh3SVYvFapQw2mA7pKsXitUqxG16i
B72vl/zTI/W7Pj8uPVyZNIcYTAd/RfrZf/xlMfur9HDFdJLBdND7+tZ197x2+cEL5GbqKiXZ
YDrofX3xryuco392mkybrVIs12KVYjFdpVhCtUr5acxn09IXNMi+bsV00Fcp44Y9n7j2//8L
mba0Yjroq5RxT9/Elr4rTaurlKFMvhkI0SplW7w9efcju9KlkRbTwwymg75KWfvKH9dWrvp4
l9uIukoZbjAd9FXK7e/vvv30dLab0fcMLaZHGEwHfVw7Un74T+M3XaRam61SrKFapcSPHdkj
7sCPZV/H+DYddA3/z7++qN0/8y9kWl2ljFQaPCSrlKNPbnvx1TG/lLVWJs1RBtNBr/V/7fjr
lDcunZEerpgebTAd0lWK1WuVMsZgOqSrFKvXKiVFMR2SVUrq+IuPNb5WL/tamTTHGkwHva97
xh5NSnhqs/RwxXSqwXTQ+/rF4Uv2/tzSRG6mrlLGGUwHva9XPvnVlNM3fy7VzGIuKSFfpVhN
VynWUK1SVr2/dVFpwnHZ162YDvoqJaHwjYKlKx8m05ZWTAd9lfJ04697P/XpT8i0Nc780zmP
acNLCebzYzvjFZaAr7AGfAVKhVKhVCgVSoVSoVQoFUqFUn1TSnUb/QLjKHZMz+nTqgfZsYUW
tnShxassQ/lOveG+nl2DIMqg/gWxZH7gHfWRZV/G/tSLMfv0uTNEalHueKv3V7QiyK/sp/Dr
m656KmRjVa9Y9ZcX0fRZTRxr+SW4PZX6dzPs96O0CfRNjPyqvy/FRVvHMu8/o5OovHFW27Y/
XSOadhjzfDtXJX6vUE4rbSCvH+JVs6p087h5UO3JdlDrI4/Jsstf9PSQ5n6INIKOe37BU1OT
V77iuFk9Rit5LdfcT4WCVQ9fZRW/mirtUtvl4Ee0tsohh4Hw0QlM/MJn7mtfMSbzEE80ZVxj
dt0fxHmTJ2XyfwQEBASE6yjk5uYeKSsrc61cuRIAAEAnI/RY6LKq0w6H49CmTZtcx44dc50/
fx4AAEAnI/RY6LLQZ6nVQr+PHj3qOnXqlGvv3r0AAAA6GaHHQpeFPnu+/ePrbaHjDQ0NAAAA
wgShy0KfVa1ubm527du3DwAAQJggdBlaDQAA0GoAAACh0erGxkYAAABhArQaAACuT62+cOGC
a//+/QAAAMIEocvQagAAgFYDAAAIjVYfPHgQAABAmACtBgCA61OrL1686Dp06BAAAIAwQegy
tBoAAKDVAAAAQqPVhw8fBgAAECZAqwEAAFoNAAAgdFp95MgRAAAAYQK0GgAArk+tvnTpkuvk
yZMAAADCBKHL0GoAAIBWAwAACI1Wi79xDgAAIDyAVgMAALQaAABA6LT69OnTAAAAwgRoNQAA
XJ9affnyZdeZM2cAAACECUKXodUAAACtBgAAEBqtbmpqAgAAECZAqwEA4PrV6rNnzwIAAAgT
oNUAAACtBgAAEBqtvnLliuvcuXMAAADCBKHLqlaXlZW5Tpw4of+MDNoHAAA6H6HHQpeFPkut
zsvL/WjLli2u48eP6zoOAACgcxF6LHRZ6DNTwtKlS+vLy8v19TYAAIDOReix0GWGgICAgHDd
hNmcKZw0TgTHztGInkq6ofzAGJP94ZxBHAsd12i7Z88eNoxv4+jcQMpPpvsW7efRBTJtFGNV
I5Xrkiju4mEI30ZzetMxcWk/iouwULwn1dzXXeDp1XrWkmGrRUuayxbxei5iWayQlegxBytm
TpYbQLtNvzu7fJI1P1bEcydkl0/Vc8hiBe7aWDPsw6ysadwpUW8RdxbmFG3m24qSUscykWRn
nH78M3H+peWxrIqxbF72X63eYNX4dgI/3/xEdvmMFFautZi1pF2eLrppnUi/sWSDVRx08UYT
acdvZLtm/fL+WJFeXCd57ymRbrsmWkqkE/F6fqzpb6/GvP6HOD3tnbVx7P25eeXTZn2842ve
dqJO4ng9L8fTDdWrxDU5q/TmZ3Kr9q9se6tJ22/W0PahantRCDkulinjopcSn62MZVGBvnTO
ZojP4MRTXpnzMjIi+cULeHw3J4bSJdBYjlHGHaP8BRmkJVWkK0xvsC8950cqaTWmtdrPwo3S
v2Z+MZi2azmXhC+Slony32kJrPynxDVai5j9ma33Uf7oq8p8s6H8KfGR7MDqW9nhyjtYSu9I
NrZPFPuwbCL7YuN0dqBiEj8fzd68x85G9Ypg7xemsY/W3sEOPjqJvZ09ir218wxzOr9iaf1i
+LlUdrBiIqtbOpR9fuBD9sH215kjt5n98btDWH3OcPbanAHs9GefsKONDeyBZV+y9cMj2Qu3
xLIfTejGnh4RxXZs/4Lde//nbEftOXby049Zxr1/ZzMXNLLJs99lE6fvZinpb7Dk237NBo3/
BYtP/QnrPvoFpmlpatA0bVxiYuI4sSVSExISUsWWGKsGvp/C06eILTGGpx8jtsRoNfD9UTz9
KLElho8YMWI4344k7EOSkpKHDnMHvq8NGDhw0E2JiYP5dYP5bp/4vn373ZiQ0J/b6a9pcTd0
79GjZ6/e7qBFRkXHxGrdNE+w2iI0r2Dx2jOOhyjNez5S9S/B40+7WSLty3GZr7nHWT9lTKpz
2EDDXKvOaZmc9ZyXKK9/UJnEdeuyXpxaePj3U+U5IYhzrh5DenhQ981yrpIVfFxMZfPYfLaY
b6NoLIhtJOlANB2LoXh0G2UMZA1Rb7KvalmCkq/ajn2pHZM60I5vc6opr2bKV21HeS6+lXYs
5fG5rIzPNaV8zlnJtw5e32xWxFbwvSx9Jirhe2J2i6E2tVDdLMp+JB2LJKKVuEwboRyLCHEf
qH49UukPdS0m/bk/HWtqatLbVbbVaE4yZ7KhXdV2nKOsAUX6oZx0Oj6C+luedzqdFuM6Q9oW
54y2WYC2NcW2Wb7JAdYp2aROZvlqlF+Sn/nK9MlKvsNa+t7nermYb1+2uf15nFIPud/T4xsu
ZSKuSjeLyyWdWGNNEPkyt1iYz4t23Xd0Mbl6Vpf/d6mQnZ1d6XA4XA899JBr+fLlpojzreWR
m5tb+fDDD+vP01avXn0VRUVFbTYbt18p3m8/+uijrscee8yLkpISv5q9sLCw8pFHHnFVVVW5
Hn/8cQ+iDP62By9Dpbh+3bp1rqeeekqnsrIyoG7ndagU12/YsMG1ceNG1/e///2A3YaXu1Jc
K94lPfPMM+1yuyeffLJy8+bNrmeffbbdbsttV3bkehH49ZVdacyo9+vnW7lf976/a0+IY+K+
TtCZ945PaR27d5ykdezeUZ1H5doh0mRev/Tqq17zejrNHYv8nFvTaQ7MNMzrVjrf1KOHxXgP
61lT8HNG2yxA25pi2yzf5ADrlGxSJ7N8Ncovyc98ZfpkJV+zed1qmNczKX13KpeYz+cZ7PVW
2mKOMhWr9cig+9WoNvzBuM7LpDLn+9knmWTT6cMfjOs8ayvrvEzaBmJbU2z7WucFUqdkkzr5
WuflU9/l++kP+ZS/s53+kEn+kG3iD5km/qDWQ/jDLe3wByeVeY2ffeIkm5VB8AcnbQOxrSm2
fflDIHVKNqmTL39YQ323xk9/WEP5V7bTH5zkD6tN/MFp4g9qPYQ/jG+HP1RSmbf62SeVZLM6
CP4gF0iB2NYU2778IZA6JZvUyZc/bKW+2+qnP2yl/Kvb6Q+V5A/PmvhDpYk/qPXIoHu/QP2h
msq8zc8+qSabNUHwh2raBmJbU2z78odA6pRsUidf/rCN+m6bn/6wjfKvaac/VJM//NTEH6pN
/EGth/CHie3whxoqc62ffVJDNuuC4A818v4iANuaYtuXPwRSp2STOvnyh1rqu1o//aGW8q9r
pz/UkD+8YeIPNSb+oNYjg97rBuoPdVTmd/zskzqyuS8I/lBH20Bsa4ptX/4QSJ2STerkq7zq
s2h//KGB8t/XTn+oI394x8Qf6kz8Qa2H8IdbyR+kD8hn+vma+TsAS4C+E0h7PEQ2d9L7mI76
TiC2d5jY9qcvQlH/HZ1Qf9W2FkQfF/nGG+rkT7vK71asrXy3YlXeucjyy+9Wdrby3YqVxk9m
G/XZqrXYlmPI6KMZ9C7HZvjG4nwr31jgeVlwn5ep7yWrqqpa1SfRLR3x5b7U96MN41N5leI1
Pm0+/N3mQ0eM+RnHuy2Iemesiz/lVN//tvd5ZaBtPprKme6jzY3PK22tPK8MtI2MtoORr6zT
DvpGL5j5TqZ80wPoU3+1cLSJFqrto2qh2fdPwRqD6WQz8xqNwaYBA3z7Fz/X3rq8yRPcZahL
OJbzIfrO7M0Ay6l+/6DohqWfiYZY/Yz746sFfGeqwVcLyG/E2Fjk49m6sZzB9ttM6mtnF5g7
jHXpSDldJvX2tDk/15E2z6fyOq8Tv11s4reZVId8H/fwofZbJ/V1ZRfwW2NdwtVv11B5K8PA
b3P88NvlVB7Vb51UhzWUTxpL5UzUfddGPnwt/biS+r66C/ixsS7h6sdbqbztKWew+r2a2qqm
C/S7sS7h2u/bqLw1YaBf6/3Qr+dYy/fZUr+qqQ6iLg/q3xU79J+LsbNp+k/E5HI966bomNS1
GLItsV1Djash/6jrAr5urEu4+notlbeuEzWujtpqXxfod2NdwrXfG6i8+8JA41b6oXG76Pmc
qnF1VAdRlyW0RpvAxnNuvmqd1tZ6zexnb6wm75Zk+R6i518yrbzvUdebyfSMSV6znO+n6Hk2
KanMv4n3FdR+8lUm8W1+2qW2y9Heb/M3f8XXzJSH8BUZl9/mi/NXh675bT4CAgJCVw+5ublH
xM/+4HcSAQBA5yP0WOiyqtMOh+PQpk2bXMeOHXOdP38eAABAJyP0WOiy0Gep1UK/jx496jp1
6pRr7969AAAAOhmhx0KX1b/lIdbbQscbGhoAAACECUKXjX/PtLm52bVv3z4AAABhgtBlaDUA
AECrAQAAhEarGxsbAQAAhAnQagAAuD61+sKFC679+/cDAAAIE4QuQ6sBAABaDQAAIDRaffDg
QQAAAGECtBoAAK5Prb548aLr0KFDAAAAwgShy9BqAACAVgMAAAiNVh8+fBgAAECYAK0GAABo
NQAAgNBp9ZEjRwAAAIQJ0GoAALg+tfrSpUuukydPAgAACBOELkOrAQAAWg0AACA0Wi3+xjkA
AIDwAFoNAADQagAAAKHT6tOnTwMAAAgToNUAAHB9avXly5ddZ86cAQAAECYIXYZWAwAAtBoA
AEBotLqpqQkAAECYAK0GAIDrV6vPnj0LAAAgTIBWAwAAtBoAAEBotPrKlSuuc+fOAQAACBOE
LqtaXVZW5jpx4oT+MzJoHwAA6HyEHgtdFvostTovL/ejLVu2uI4fP67rOAAAgM5F6LHQZaHP
TAlLly6tLy8v19fbAAAAOhehx0KXGQICAgLCdRNmc6Zw0jgRHDtHI3oq6YbyA2NM9odzBnFs
dFyj7Z49e9gwvo2jcwMpPwud/xbt59EFMm0UY1UjleuSKO7iYQjfRnN60zFxaT+Ki7BQvCfV
3Ndd4OnVetaSYatFS5rLFvF6LmJZrJCV6DEHK2ZOlhtAu02/O7t8kjU/VsRzJ2SXT9VzyGIF
7tpYM+zDrKxp3ClRbxF3FuYUbebbipJSxzKRZGecfvwzcf6l5bGsirFsXvZfrd5g1fh2Aj/f
/ER2+YwUVq61mLWkXZ4uummdSL+xZINVHHTxRhNpx29ku2b98v5YkV5cJ3nvKZFuuyZaSqQT
8Xp+rOlvr8a8/oc4Pe2dtXHs/bl55dNmfbzja952ok7ieD0vx9MN1avENTmr9OZncqv2r2z7
CJO236yh7UPV9qJAclwsU8ZFLyU+WxnLIn1fpd/U+AxOPOWVOS8jI5JfvIDHd3NiKF0CjeUY
Zdwxyl+QQVpSRbrC9Ab70nN+pJJWY1qr/SzcKP1r5heDabuWc0n4ImmZKP+dlsDKf0pco7WI
2Z/Zeh/lj76qzDcbyp8SH8kOrL6VHa68g6X0jmRj+0SxD8smsi82TmcHKibx89HszXvsbFSv
CPZ+YRr7aO0d7OCjk9jb2aPYWzvPMKfzK5bWL4afS2UHKyayuqVD2ecHPmQfbH+dOXKb2R+/
O4TV5wxnr80ZwE5/9gk72tjAHlj2JVs/PJK9cEss+9GEbuzpEVFsx/Yv2L33f8521J5jJz/9
mGXc+3c2c0Ejmzz7XTZx+m6Wkv4GS77t12zQ+F+w+NSfsO6jX2CalqYGTdPGJSYmjhNbIjUh
ISFVbImxauD7KTx9itgSY3j6MWJLjFYD3x/F048SW2L4iBEjhvPtSMI+JCkpeegwd+D72oCB
AwfdlJg4mF83mO/2ie/bt9+NCQn9uZ3+mhZ3Q/cePXr26u0OWmRUdEys1k3zBKstQvMKFq89
43iI0rznI1X/Ejz+tJsl0r4cl/mae5z1U8akOocNNMy16pyWyVnPeYny+geVSVy3LuvFqYWH
fz9VnhOCOOfqMaSHB3XfLOcqWcHHxVQ2j81ni/k2isaC2EZSXaLpWAzFo9soYyBriHqTfVXL
EpR81XbsS+2Y1IF2fJtTTXk1U75qO8pz8a20YymPz2VlfK4p5XPOSr518PpmsyK2gu9l6TNR
Cd8Ts1sMtalYelhpG6lsrbSNpDaOVI5bqD3ksYgQ94Hq1yOV/lDXYtKf+9OxpqYmvV1FWw3l
jOYk8/wmG9pVbcc5VDeZ/iGeMJ2Oj6D+lmtJp9NpMa4zpG1xLtPQT7KP2rIt/Mho2yxfUcbJ
AdZpMuUv8x3W0kc+17UyjdWkjcUcopYnncqzyM/ypFM9M320sVySq23sT5llOY35NQ0Y4LPP
xLn29pm4T7jLUJeOlNNlUm9Pm/NzapsvCrDNF1F5AymnOpYVDbSox1U/8Scu7L9J92iisJtp
faPWQZ7rTWW1Ufp08uNFtJaaxzVvBV9hitW6netbLv83l+vdCq53BRwH6Z2YR7rRNorys1Hc
SnGrks6qIK/x1RZtjY1M6qd8P/spk/zJeY3GRij1zFiXazU28gNs83wqrzMMxkac5vb1xZwT
HIfJ2FhMc6k6NjKpDqIuG32MDfMVgZ0fcadqGTsVfo+bKB/p1LGjHjfmZTbuOjLenNT3a/zs
eyf5aGUXGG/Gulyr8bYmwDZfQ+WtDIPxVkDjZzk9a3jEZLwtp3WnOt6cVAdRlyX6fFXAx1E+
H0HuexSj/7fXnyupbbf62baV5APVXcCfjXW5Vv68NcA230rlbU85ffV7NZVhm59lqKa2qukC
/W6sy7Xq920Btvk2Km9NGOjYR6RLz3F2cH5uomPPkU1Vx6qpDqIuj3Hu4WsCsU4o5v85eKyU
/5vD1wYz9BVDvr5SGKGvGubwdfg0zzrBbI1gNudHm2ijjdpUTS+f9bRXN2uoL2v97Msa8rm6
LjB+jHW5VuOnNsA2r6Xy1gVRN+uoDO/4WYY6aqt9XaDfjXW5Fv0eaDlFmzdQefeFgW4+Qfdb
u3z4jTw3waCbdVQHUZff6fdjdjaba2Mpm8ju1rVzOlvILdzCZvI1YSlnPL+/Gqffh63i+pnq
d/ox/F6uiOXx/5xcm6W+xhi0NsZEO6W+xpposfrcw0brW1W/g5l/tCF9lB/3eWrfq/Hu9Cxc
vh+L1/NO4f/OL85xFmYVV9iLCh1jy7Mq7FPnzV881V6Ua5/hzBs/1Z5XXFRemm8vzip18BIP
4n23kBdijq3FfzWLe6v69LX43kGj+xAZpB/KsK0vY3/qxX1s+twZIvXShRYWb3U/g/d6p80P
DOD1mcKvbzIaOWpjVa9YPc9y5btY2Tc9lefu4l78dv2IaIAobvEyR7TGm3ofyXcFaujDucOj
HnfqPSL8ogfl7Woj3EVfYbysl0h+kTGZ7GjsVnbCk6dsM4vBfyPJp2Sd0vWvQCyE/uLUFu/p
WZv+dkJcozuKWWruXZpXavEmZm5ZQalzZYHDnl20YmVWsbOkqLBEudgTot374mKLfrGepXlC
q78Jbf4mjPA3YaS/CaP8TRjtb8KYqxPOYNN4yS3cYx69AR9CISB0leAKcnjAM9lYaULQlL1m
rVmzccHRj+0e/9WZmeG6laL4gPdNh1KXlglP83GuWXNjUyavV/Tp0ubH0kMG/66wBHyFNeAr
UCqUCqVCqVAqlAqlQqlQKpTqm1Kq26Z8WuV+GfYgO7bQoj/sU8tg/Fj2m/yQUt2XD5LFA0r1
A+y+ygP/WOb94bH8mNvYturLJfXlhHgBkNNKG8jrh3jVrCrdPG4eVHtmP1wmj8myy/vhh+iH
3+SLHOkz4oNoNV9x3Kweo5W8lvP9lCDWw1dZizlpl9ouBz+itVUOOQyEj07QHyRzX/uKMZmH
eLEk4xqz6/4gzps8qZD/IyAgICBcRyE3N/eI+GV6+CUoAADQ+Qg9Frqs6rTD4Ti0adMm17Fj
x1znz58HAADQyQg9Fros9FlqtdDvo0ePuk6dOuXau3cvAACATkbosdBl9Y8HiPW20PGGhgYA
AABhgtBl4x9QbG5udu3btw8AAECYIHQZWg0AANBqAAAAodHqxsZGAAAAYQK0GgAArk+tvnDh
gmv//v0AAADCBKHL0GoAAIBWAwAACI1WHzx4EAAAQJgArQYAgOtTqy9evOg6dOgQAACAMEHo
MrQaAACg1QAAAEKj1YcPHwYAABAmQKsBAABaDQAAIHRafeTIEQAAAGECtBoAAK5Prb506ZLr
5MmTAAAAwgShy9BqAACAVgMAAAiNVou/cQ4AACA8gFYDAAC0GgAAQOi0+vTp0wAAAMIEaDUA
AFyfWn358mXXmTNnAAAAhAlCl6HVAAAArQYAABAarW5qagIAABAmQKsBAOD61eqzZ88CAAAI
E6DVAAAArQYAABAarb5y5Yrr3LlzAAAAwgShy6pWl5WVuU6cOKH/jAzaBwAAOh+hx0KXhT5L
rc7Ly/1oy5YtruPHj+s6DgAAoHMReix0WegzU8LSpUvry8vL9fU2AACAzkXosdBlhoCAgIBw
3YTZnCmcNE4Ex87RiJ5KuqH8wBiT/eGcQRwLHddou2fPHjaMb+Po3EDKT6b7Fu3n0QUybRRj
VSOV65Io7uJhCN9Gc3rTMXFpP4qLsFC8J9Xc113g6dV61pJhq0VLmssW8XouYlmskJXoMQcr
Zk6WG0C7Tb87u3ySNT9WxHMnZJdP1XPIYgXu2lgz7MOsrGncKVFvEXcW5hRt5tuKklLHMpFk
Z5x+/DNx/qXlsayKsWxe9l+t3mDV+HYCP9/8RHb5jBRWrrWYtaRdni66aZ1Iv7Fkg1UcdPFG
E2nHb2S7Zv3y/liRXlwnee8pkW67JlpKpBPxen6s6W+vxrz+hzg97Z21cez9uXnl02Z9vONr
3naiTuJ4PS/H0w3Vq8Q1Oav05mdyq/avbHurSdtv1tD2oWp7UQg5LpYp46KXEp+tjGVRgb50
zmaIz+DEU16Z8zIyIvnFC3h8NyeG0iXQWI5Rxh2j/AUZpCVVpCtMb7AvPedHKmk1prXaz8KN
0r9mfjGYtms5l4QvkpaJ8t9pCaz8p8Q1WouY/Zmt91H+6KvKfLOh/CnxkezA6lvZ4co7WErv
SDa2TxT7sGwi+2LjdHagYhI/H83evMfORvWKYO8XprGP1t7BDj46ib2dPYq9tfMMczq/Ymn9
Yvi5VHawYiKrWzqUfX7gQ/bB9teZI7eZ/fG7Q1h9znD22pwB7PRnn7CjjQ3sgWVfsvXDI9kL
t8SyH03oxp4eEcV2bP+C3Xv/52xH7Tl28tOPWca9f2czFzSyybPfZROn72Yp6W+w5Nt+zQaN
/wWLT/0J6z76BaZpaWrQNG1cYmLiOLElUhMSElLFlhirBr6fwtOniC0xhqcfI7bEaDXw/VE8
/SixJYaPGDFiON+OJOxDkpKShw5zB76vDRg4cNBNiYmD+XWD+W6f+L59+92YkNCf2+mvaXE3
dO/Ro2ev3u6gRUZFx8Rq3TRPsNoiNK9g8dozjocozXs+UvUvweNPu1ki7ctxma+5x1k/ZUyq
c9hAw1yrzmmZnPWclyivf1CZxHXrsl6cWnj491PlOSGIc64eQ3p4UPfNcq6SFXxcTGXz2Hy2
mG+jaCyIbSTpQDQdi6F4dBtlDGQNUW+yr2pZgpKv2o59qR2TOtCOb3OqKa9myldtR3kuvpV2
LOXxuayMzzWlfM5ZybcOXt9sVsRW8L0sfSYq4XtidouhNrVQ3SzKfiQdiySilbhMG6Eciwhx
H6h+PVLpD3UtJv25Px1ramrS21W21WhOMmeyoV3VdpyjrAFF+qGcdDo+gvpbnnc6nRbjOkPa
FueMtlmAtjXFtlm+yQHWKdmkTmb5apRfkp/5yvTJSr7DWvre53q5mG9ftrn9eZxSD7nf0+Mb
LmUirko3i8slnVhjTRD5MrdYmM+Ldt13dDG5elaX/3epkJ2dXelwOFwPPfSQa/ny5aaI863l
kZubW/nwww/rz9NWr159FUVFRW02G7dfKd5vP/roo67HHnvMi5KSEr+avbCwsPKRRx5xVVVV
uR5//HEPogz+tgcvQ6W4ft26da6nnnpKp7KyMqBu53WoFNdv2LDBtXHjRtf3v//9gN2Gl7tS
XCveJT3zzDPtcrsnn3yycvPmza5nn3223W7LbVd25HoR+PWVXWnMqPfr51u5X/e+v2tPiGPi
vk7QmfeOT2kdu3ecpHXs3lGdR+XaIdJkXr/06qte83o6zR2L/Jxb02kOzDTM61Y639Sjh8V4
D+tZU/BzRtssQNuaYtss3+QA65RsUiezfDXKL8nPfGX6ZCVfs3ndapjXMyl9dyqXmM/nGez1
VtpijjIVq/XIoPvVqDb8wbjOy6Qy5/vZJ5lk0+nDH4zrPGsr67xM2gZiW1Ns+1rnBVKnZJM6
+Vrn5VPf5fvpD/mUv7Od/pBJ/pBt4g+ZJv6g1kP4wy3t8AcnlXmNn33iJJuVQfAHJ20Dsa0p
tn35QyB1Sjapky9/WEN9t8ZPf1hD+Ve20x+c5A+rTfzBaeIPaj2EP4xvhz9UUpm3+tknlWSz
Ogj+IBdIgdjWFNu+/CGQOiWb1MmXP2ylvtvqpz9spfyr2+kPleQPz5r4Q6WJP6j1yKB7v0D9
oZrKvM3PPqkmmzVB8Idq2gZiW1Ns+/KHQOqUbFInX/6wjfpum5/+sI3yr2mnP1STP/zUxB+q
TfxBrYfwh4nt8IcaKnOtn31SQzbrguAPNfL+IgDbmmLblz8EUqdkkzr58oda6rtaP/2hlvKv
a6c/1JA/vGHiDzUm/qDWI4Pe6wbqD3VU5nf87JM6srkvCP5QR9tAbGuKbV/+EEidkk3q5Ku8
6rNof/yhgfLf105/qCN/eMfEH+pM/EGth/CHW8kfpA/IZ/r5mvk7AEuAvhNIezxENnfS+5iO
+k4gtneY2PanL0JR/x2dUH/VthZEHxf5xhvq5E+7yu9WrK18t2JV3rnI8svvVna28t2KlcZP
Zhv12aq12JZjyOijGfQux2b4xuJ8K99Y4HlZcJ+Xqe8lq6qqWtUn0S0d8eW+1PejDeNTeZXi
NT5tPvzd5kNHjPkZx7stiHpnrIs/5VTf/7b3eWWgbT6aypnuo82NzyttrTyvDLSNjLaDka+s
0w76Ri+Y+U6mfNMD6FN/tXC0iRaq7aNqodn3T8Eag+lkM/MajcGmAQN8+xc/1966vMkT3GWo
SziW8yH6zuzNAMupfv+g6Ialn4mGWP2M++OrBXxnqsFXC8hvxNhY5OPZurGcwfbbTOprZxeY
O4x16Ug5XSb19rQ5P9eRNs+n8jqvE79dbOK3mVSHfB/38KH2Wyf1dWUX8FtjXcLVb9dQeSvD
wG9z/PDb5VQe1W+dVIc1lE8aS+VM1H3XRj58Lf24kvq+ugv4sbEu4erHW6m87SlnsPq9mtqq
pgv0u7Eu4drv26i8NWGgX+v90K/nWMv32VK/qqkOoi4P6t8VO/Sfi7GzafpPxORyPeum6JjU
tRiyLbFdQ42rIf+o6wK+bqxLuPp6LZW3rhM1ro7aal8X6HdjXcK13xuovPvCQONW+qFxu+j5
nKpxdVQHUZcltEabwMZzbr5qndbWes3sZ2+sJu+WZPkeoudfMq2871HXm8n0jEles5zvp+h5
NimpzL+J9xXUfvJVJvFtftqltsvR3m/zN3/F18yUh/AVGZff5ovzV4eu+W0+AgICQlcPubm5
R8TP/uB3EgEAQOcj9FjosqrTDofj0KZNm1zHjh1znT9/HgAAQCcj9FjostBnqdVCv48ePeo6
deqUa+/evQAAADoZocdCl9W/5SHW20LHGxoaAAAAhAlCl41/z7S5udm1b98+AAAAYYLQZWg1
AABAqwEAAIRGqxsbGwEAAIQJ0GoAALg+tfrChQuu/fv3AwAACBOELkOrAQAAWg0AACA0Wn3w
4EEAAABhArQaAACuT62+ePGi69ChQwAAAMIEocvQagAAgFYDAAAIjVYfPnwYAABAmACtBgAA
aDUAAIDQafWRI0cAAACECdBqAAC4PrX60qVLrpMnTwIAAAgThC5DqwEAAFoNAAAgNFot/sY5
AACA8ABaDQAA0GoAAACh0+rTp08DAAAIE6DVAABwfWr15cuXXWfOnAEAABAmCF2GVgMAALQa
AABAaLS6qakJAABAmACtBgCA61erz549CwAAIEyAVgMAALQaAABAaLT6ypUrrnPnzgEAAAgT
hC6rWl1WVuY6ceKE/jMyaB8AAOh8hB4LXRb6LLU6Ly/3oy1btriOHz+u6zgAAIDOReix0GWh
z0wJS5curS8vL9fX2wAAADoXocdClxkCAgICwnUTZnOmcNI4ERw7RyN6KumG8gNjTPaHcwZx
bHRco+2ePXvYML6No3MDKT8Lnf8W7efRBTJtFGNVI5Xrkiju4mEI30ZzetMxcWk/iouwULwn
1dzXXeDp1XrWkmGrRUuayxbxei5iWayQlegxBytmTpYbQLtNvzu7fJI1P1bEcydkl0/Vc8hi
Be7aWDPsw6ysadwpUW8RdxbmFG3m24qSUscykWRnnH78M3H+peWxrIqxbF72X63eYNX4dgI/
3/xEdvmMFFautZi1pF2eLrppnUi/sWSDVRx08UYTacdvZLtm/fL+WJFeXCd57ymRbrsmWkqk
E/F6fqzpb6/GvP6HOD3tnbVx7P25eeXTZn2842vedqJO4ng9L8fTDdWrxDU5q/TmZ3Kr9q9s
+wiTtt+soe1D1faiQHJcLFPGRS8lPlsZyyJ9X6Xf1PgMTjzllTkvIyOSX7yAx3dzYihdAo3l
GGXcMcpfkEFaUkW6wvQG+9JzfqSSVmNaq/0s3Cj9a+YXg2m7lnNJ+CJpmSj/nZbAyn9KXKO1
iNmf2Xof5Y++qsw3G8qfEh/JDqy+lR2uvIOl9I5kY/tEsQ/LJrIvNk5nByom8fPR7M177GxU
rwj2fmEa+2jtHezgo5PY29mj2Fs7zzCn8yuW1i+Gn0tlBysmsrqlQ9nnBz5kH2x/nTlym9kf
vzuE1ecMZ6/NGcBOf/YJO9rYwB5Y9iVbPzySvXBLLPvRhG7s6RFRbMf2L9i993/OdtSeYyc/
/Zhl3Pt3NnNBI5s8+102cfpulpL+Bku+7dds0PhfsPjUn7Duo19gmpamBk3TxiUmJo4TWyI1
ISEhVWyJsWrg+yk8fYrYEmN4+jFiS4xWA98fxdOPElti+IgRI4bz7UjCPiQpKXnoMHfg+9qA
gQMH3ZSYOJhfN5jv9onv27ffjQkJ/bmd/poWd0P3Hj169urtDlpkVHRMrNZN8wSrLULzChav
PeN4iNK85yNV/xI8/rSbJdK+HJf5mnuc9VPGpDqHDTTMteqclslZz3mJ8voHlUlcty7rxamF
h38/VZ4Tgjjn6jGkhwd13yznKlnBx8VUNo/NZ4v5NorGgthGUl2i6VgMxaPbKGMga4h6k31V
yxKUfNV27EvtmNSBdnybU015NVO+ajvKc/GttGMpj89lZXyuKeVzzkq+dfD6ZrMitoLvZekz
UQnfE7NbDLWpWHpYaRupbK20jaQ2jlSOW6g95LGIEPeB6tcjlf5Q12LSn/vTsaamJr1dRVsN
5YzmJPP8JhvaVW3HOVQ3mf4hnjCdjo+g/pZrSafTaTGuM6RtcS7T0E+yj9qyLfzIaNssX1HG
yQHWaTLlL/Md1tJHPte1Mo3VpI3FHKKWJ53Ks8jP8qRTPTN9tLFckqtt7E+ZZTmN+TUNGOCz
z8S59vaZuE+4y1CXjpTTZVJvT5vzc2qbLwqwzRdReQMppzqWFQ20qMdVP/EnLuy/SfdoorCb
aX2j1kGe601ltVH6dPLjRbSWmsc1bwVfYYrVup3rWy7/N5fr3QqudwUcB+mdmEe60TaK8rNR
3Epxq5LOqiCv8dUWbY2NTOqnfD/7KZP8yXmNxkYo9cxYl2s1NvIDbPN8Kq8zDMZGnOb29cWc
ExyHydhYTHOpOjYyqQ6iLht9jA3zFYGdH3Gnahk7FX6Pmygf6dSxox435mU27joy3pzU92v8
7Hsn+WhlFxhvxrpcq/G2JsA2X0PlrQyD8VZA42c5PWt4xGS8Lad1pzrenFQHUZcl+nxVwMdR
Ph9B7nsUo/+3158rqW23+tm2leQD1V3An411uVb+vDXANt9K5W1POX31ezWVYZufZaimtqrp
Av1urMu16vdtAbb5NipvTRjo2EekS89xdnB+bqJjz5FNVceqqQ6iLo9x7uFrArFOKOb/OXis
lP+bw9cGM/QVQ76+Uhihrxrm8HX4NM86wWyNYDbnR5too43aVE0vn/W0VzdrqC9r/ezLGvK5
ui4wfox1uVbjpzbANq+l8tYFUTfrqAzv+FmGOmqrfV2g3411uRb9Hmg5RZs3UHn3hYFuPkH3
W7t8+I08N8Ggm3VUB1GX3+n3Y3Y2m2tjKZvI7ta1czpbyC3cwmbyNWEpZzy/vxqn34et4vqZ
6nf6Mfxerojl8f+cXJulvsYYtDbGRDulvsaaaLH63MNG61tVv4OZf7QhfZQf93lq36vx7vQs
XL4fi9fzTuH/zi/OcRZmFVfYiwodY8uzKuxT581fPNVelGuf4cwbP9WeV1xUXppvL84qdfAS
D+J9t5AXYo6txX+Fg7qU98QuwzvjUAWN7kNkkH4ow7a+jP2pF/ex6XNniNRLF1pYvNX9DN7r
nTY/MIDXZwq/vslo5KiNVb1i9TzLle9iZd/0VJ67i3vx2/UjffhYj+IWL3NEa7yp95F8V6CG
Ppw79Nw0yuFOvVeEb/Sg/F1thLu49wuvmaCknajEv6XEb1X652X9bZSFPG5CG5Ymsqt7WQ3f
auP8rW2cn0xto7Fb2QlPG8h+thjGXCSNA9kP6fqXKxZCf9lri/fYselvVMQ1unObpeYjQvNK
Ld4ezS0rKHWuLHDYs4tWrMwqdpYUFZYoF3tCtHtfXGzRL9azNE9o9Tehzd+EEf4mjPQ3YZS/
CaP9TRhzdcIZbBovuYV7+KM34OMtBISuElxBDg94ltdWmhA0Za9Za9ZsXHD0Y7vHf3VmZrhu
pSg+4H2jpNSlZcLTfJxr1tzYlMnrh57c/tXzQYkIgwmb/tClTJFlIfBf0+3BjGB3/57q3059
emua/snY1y7Wr8W0ZjCdYV+VVVDmCJ7p//lRVfKHsY2T3aY1xbRFMX2jWCyKFW5pUWlWgdfk
3tGQIGt9Y4tpq5npEmdeoTPXmZ1VWBrUAvBaK6ZtimnxCc7s4tKJdxc7pi/MvGVmVmnW+Nxx
ufZVJal2k+Nj5hXl5TkL27b44Oz6w+lU68QW0xF+mr7XWZBjL61Y6WCBm379O3GHyLSmmI4M
1LRdWvTf9Miboz8n0xbFdFTbpsmEofIBmGYDd/94l9u0VTEd3U7Tnsr7Ybqp36z/olrbFNMx
BtMteZtbao/plxNs+8h0hGI6VjE9IBQePumt/8m58f/rJcf1gBbT3fw03W4Pv+2fe+xYX9aT
TGuK6bhATQfq4R9XPZG498BAMm1RTN/QtumOefjn87f+8cT6Buprq2K6eztN++1m89beWFJU
baNa2xTTPQymg+7hs//yj//c+HYkmY5QTPdUTA8JhYfnN56ISNgzSmr4kBbTvfw03W4PT7C+
kPPeh7dJDVdM9w7UdKAenvG/H4xb/cvnaalgUUz3adt0xzx8+7EVDz0z+h/SwxXT8e007beb
9Z/03fLFQ7ZIDVdM9zWYDrqHv1k7KHfo9O9JDVdM91NMiw9jv11cVF44dkZRcUlFab7DPoN1
1LT7NuLMWvLwgS2mb2zddEaQTWuK6QSj6azi0gJHaSmvb3BMPz8364MRG4dKDVdM9/dlOiNI
phO+nXqH/U+bpYcrpgcYTC+0lzxcllXsYMEy/e+/Kfne2R/8t/RwxfRAxfRN4p2GPaO4aFnW
MmeBs7RCrMkLywoK7LNY+1cpL//l+TsK50khvanF9KC2TGcVlDqKC7NKnascvASBm/7xhKP1
Ta4lcqmgmL7JYHohN1IkTK70lMDpKGHtN+1992FRTCcaTE9z5uY6ih2F2Q47F7Cp37k7m3XM
9Kzn7q2vSrmVam296RX9ubHx1lqaVm+vZfDvCkvAV1gDvgKlQqlQKpQKpUKpUCqUCqVCqb4p
pfp0ym1V7kfYMfojkHlFhQX8DiHXWSq/Q/p2K98eWXy8KgvabcV18tr1dvrp4Ajejhpz6d8e
iZ8aTDD0jxpavj0Sz/ru1H9GWH6r0Zuehfl6Lfua5ysdNXV8K1fIL5Xm0U2hYD7FRchQ4gso
LvrQ+0sl9eqvTazIHGXfG89LK75eV0vLsu+N5zvydZLn1W604sNMfBMj0k1/uEzcnRf6+JxJ
87pAdFhm1rIChxgjxY6SsoLSEoMlfaAkMLvF60JRurvLilc5zMqVwKKtbab2hG/MZ0psyG72
1kF82oGA0FXDcauimlHu7QPKudaCxeuRv4WJr0jds4U6fwiBoXlnyqYpXhnsXib2X/7hD19J
NzxK907HBol94+dFxtDWeZPQlN5WCimM8htZdU5kPmZ9pqwnZlalKGtLuR3Tk+m/aWuBMrvL
q2dVFSttq+em10hru8x6um7M3aZ/ab1uaivp8Qr6/Xbc8kt/WbvW5f63RP/p8ZZZuypdrbnc
/45+7X133Zc22rF65cjlo5eMuiGWZejTzfTVK4sKHYWlzqwC+V29Q075v3G3yG/1H5fIzHeW
eE7Zs7MK7csc9vysYr6QLRLL4lR7ZnGFPbespMRZmGcvd/KMxNsTZ6FTz1v/qsqeW1Rsn53K
fqc3q6jBAvY76dsICAgI10lY6BbHRfq9wX1p4lcLZHr9LiwZ/t3r9/i9Tfe+mhBnXQJZt/ff
mzPZHd3ITsW456HMrDJ2Umj44kiWZztQ/uIPGsu5hN88bvaYJWOXfFMb/eZxy7/ZXjfb7KDw
l2lFZcsKxMyb6VzhYB5/mTNv5C2jvrk+U1Aoqr8c/oKAgIDQuSFIP4Z9PWdjMfCY/gn5ZraF
PcjvyJM4k3y8rfKsAimot8yBXzFryuKqWCrRPH17r+nqdYnp0ftafqjr5R/+cEe6HrM3Tv1J
eo3+RMLSSgtoPstrDOq6OVT5LqZ20Hje8zvSDlM2XdnSBdpBPGHK6Eg77F449LddoB2sPO8F
HWkH+/jL/3xdt8PMKc9XuVXqBa5Obhu5lOq1CMYu8gPv6+3jbUt8Tt3aU8WghRereuvyK372
dhCzeB6Hp7T1YPOGVE9TVOsNE5DVKTuqxPYPrCdZlK9I7fmOgpWtXHlNGgW36p0Wpoj+v33h
9JkPKD39gLunvym36jum/MPzC/PlL7F5foqvnwafxdy/Uv7qnwYXIjNPimpakMfTgr3ffbYg
0T6FkRHvnwZXTS8P9lD+97d+c+bizGPpbtMa8/5pcNW0eAAYVNM/+NPfE/ZM/opMW5j3T4Or
pr0dNAimr3w8fMIv1p4l01bFtFg8S9Mx7r4Oruk/Z1e8e2Vob9nXMb5N874Orunv/UtG3aRf
bpd9HeP9M/DStBaKWl+p/vGyjxdG76Zaa94/A6+aDnqtF02Jf/6heYdlrTXvn4FXTQsPD6rp
xJ7zHzwVeV56uOb9M/Cq6aB7+Cx7/QvrHzwhPVzz/hl4adoSir7+r6mvVtSPHC893OL9M/Cq
6aD39aTs//2DN4/LWmsW75+BV00Hva8X35f2SY/dFqq1xeL9M/Cq6aD39eM7Lz4x52sppFaL
uaSIWXCaI6/Y4SjRvxjlkZyiFUFZCSbIvo7zbdrzQ4zBMp03ufHjuGNfyr5uxfTUZSVFBWWl
DvuishWi6ov0gpS033Rhc8Lvuue9L/u6FdOLKlJXs2CaPvvkCzvXd/sOmbbGef++A2F6fssq
Jbim52t/G/hejz/pDT7fa5Vyg8E0H9fBNX3vxmdP3fr8q2RaXaV0N5jWVynBNJ3f/fWX0uvc
v6lnvtcqpYfBtPe4DoLpoQe/V/OTCSPItNkqZb7pKiUIprt/Mv9/zj78H7KvY3yb9tbwIJju
9V6/2+4+8Y7s6xjv3/IgTWuhqPWn6W+ser93/S6qteb9Wx5U00Gvdb31yI/3Fv2NTKurlN4G
094zVzD6+tPX//ON819Tg6urlD4G00H38P957mDV3NILZFpdpcQrpi2h6OuXM360/IcbP5Ee
bvH+LQ+q6aD3ddH4qndffUaaVlcp/Qymg97X6q9amO+1SrnRYDrofe1t2myVMt/3KqVjptVV
ynzTVcp836uUDrrZrN+s2ZL0Y9nXrZgO+irlx4P/9G+OC/vluG7FdNBXKdtP/H7s7Dl75biO
8/6NHsJ0RqhWKd95uvpv/cvcv/Isw2uV0t9gOuirlPQv/tErMfZDMq2uUgYYTAd9lfJBwcR/
TDgWO8VtWl2lDDSYDvq4tr+9eMfbP7OQabNVSkaoVikH/+Pffrop/T3Z1zG+TQddw4/fPu6j
5a//XvZ1jPfvMZGmQ7JK2frl8i0rJu7eRbXWvH+PiWo66LVO+vnc/3X3z34na615/x4T1XTQ
Z67jX7wyeeRAF5lWVymDDaaD7uEHX3+v8WebLpBpdZViV0yHZJXy5RNf3lX2vS+lhyuT5hCD
6aD39c5bXq7ZXvaJ7GvFdJLBdND7ekNaekP83pFSzRTTyQbTQe/rtz7e/OUdtwyRamYxl5SQ
r1IyTFcpGaFapSz5l7rvRJ48Lvu6FdNBX6UU7Ko/NKSbTfZ1K6aDvkpZoP1gW82vj8lxrZge
Sm62IFSrlLot//Hz/3P8D7rpBV6rlGEG00FfpZQ+unDU8bl7yLS6ShluMB30Vcr3fjt0wp+f
HDDFbVpdpYwwmA76uO73LUtCxrLeZNpslbIgVKuUnQPn/u3+5p2yr2N8mw66hm9//M+//vhU
vexrxfRIpcFDskop/P7u31TtensX1VqZNEcZTAe91jM+++Evux1sJNPqKmW0wXTQZ66/17yz
Ivfxr6jB1VXKGIPpoHv4rz5rbPzrr8+SaXWVkqKYDskq5bln3hrTs/GA9HBl0hxrMB30vr5/
3KoTX/U+Jj1cMZ1qMB3SZykLvFYp4wymQ/osZYHpKmXBtVilLDBdpSwI1Sql6r9K+tbvfEv2
dSumg75KebLXM5uObtonx3UrpoO+Snnyk/87IWfoe3Jcx5l/OucxrXzXI4N/V1gCvsIa8BUo
FUqFUqFUKBVKhVKhVCgVSvVNKdVt9Asc49gxPadPqx5kOUss7KN7LV5lkX8qVb3XY9cgBPqn
YkW5Q/2nYtV9+ed8E+ibGPlVf1/W8meXY+kaGRIpvbFt1T/xrf6JaPF7hXJaaQN5/RCvmlWl
m8fNg2pPtoNaH3lMll3+oqdCzf0QSf45bc8veGpq8spXHDerx2glryLN/VQoWPXwVVbxq6ma
rrRdDn5Ea6scchgIHxV/iPdl8dSe5y3zEE80ZVxjdt0fMq6YPj2R/yMgICAgXMchNzf3SFlZ
mWvlypUAAADCDKHPQqdV3XY4HIc2bdrkOnbsmOv8+fMAAADCDKHPQqeFXkvtFnp+9OhR16lT
p1x79+4FAAAQZgh9Fjot9Fpqt1iPC11vaGgAAAAQpgidFnqtandzc7Nr3759AAAAwhSh09Bu
AACAdgMAAOgc7W5sbAQAABCmQLsBAKBraPeFCxdc+/fvBwAAEKYInYZ2AwAAtBsAAEDnaPfB
gwcBAACEKdBuAADoGtp98eJF16FDhwAAAIQpQqeh3QAAAO0GAADQOdp9+PBhAAAAYQq0GwAA
oN0AAAA6T7uPHDkCAAAgTIF2AwBA19DuS5cuuU6ePAkAACBMEToN7QYAAGg3AACAztFu8Tfk
AQAAhCfQbgAAgHYDAADoPO0+ffo0AACAMAXaDQAAXUO7L1++7Dpz5gwAAIAwReg0tBsAAKDd
AAAAOke7m5qaAAAAhCnQbgAA6DraffbsWQAAAGEKtBsAAKDdAAAAOke7r1y54jp37hwAAIAw
Rei0qt1lZWWuEydO6D+zg/YBAIDwQ+iz0Gmh11K78/JyP9qyZYvr+PHjuq4DAAAIL4Q+C50W
es2UsHTp0vry8nJ9PQ4AACC8EPosdJohICAgIFy3YTZnCieNE8GxczSip5JuKD8wxmR/OGcQ
x0LHNdru2bOHDePbODo3kPKT6b5F+8vpApk2irGqkcp1SRR38TCEb6M5vemYuLQfxUVYKN67
au7rLvD0aj1rybDVoiXNZYt4PRexLFbISvSYgxUzJ8sNoN2m351dPsmaHyviuROyy6fqOWSx
AndtrBn2YVbWNO6UqLeIOwtzijbzbUVJqWOZSLIzTj/+mTj/0vJYVsVYNi/7r1ZvsGp8O4Gf
b34iu3xGCivXWsxa0i5PF920TqTfWLLBKg66eKOJtOM3sl2zfnl/rEgvrpO895RIt10TLSXS
iXg9P9b0t1djXv9DnJ72zto49v7cvPJpsz7e8TVvO1Encbyel+PphupV4pqcVXrzM7lV+1e2
vdWk7TdraPtQtb0ohBwXy5Rx0UuJz1bGsqhAXzpnM8RncOIpr8x5GRmR/OIFPL6bE0PpEmgs
xyjjjlH+ggzSkirSFaY32Jee8yOVtBrTWu1n4UbpXzO/GEzbtZxLwhdJy0T577QEVv5T4hqt
Rcz+zNb7KH/0VWW+2VD+lPhIdmD1rexw5R0spXckG9snin1YNpF9sXE6O1AxiZ+PZm/eY2ej
ekWw9wvT2Edr72AHH53E3s4exd7aeYY5nV+xtH4x/FwqO1gxkdUtHco+P/Ah+2D768yR28z+
+N0hrD5nOHttzgB2+rNP2NHGBvbAsi/Z+uGR7IVbYtmPJnRjT4+IYju2f8Huvf9ztqP2HDv5
6ccs496/s5kLGtnk2e+yidN3s5T0N1jybb9mg8b/gsWn/oR1H/0C07Q0NWiaNi4xMXGc2BKp
CQkJqWJLjFUD30/h6VPElhjD048RW2K0Gvj+KJ5+lNgSw0eMGDGcb0cS9iFJSclDh7kD39cG
DBw46KbExMH8usF8t0983779bkxI6M/t9Ne0uBu69+jRs1dvd9Aio6JjYrVumidYbRGaV7B4
7RnHQ5TmPR+p+pfg8afdLJH25bgs0NzjrJ8yJtU5bKBhrlXntEzOes7LlNdJKpO4bl3Wi1ML
D/9+qjwnBHHO1WNIDw/qvlnOVbKCj4upbB6bzxbzbRSNBbGNJB2IpmMxFI9uo4yBrCHqTfZV
LUtQ8lXbsS+1Y1IH2vFtznOU10XKV21HeS6+lXYs5fG5rIzPNaV8zlnJtw5e32xWxFbwvSx9
Jirhe2J2i6E2tVDdLMp+JB2LJKKVuEwboRyLCHEfqH49UukPdS0m/bk/HWtqatLbVbbVaE4y
Z7KhXdV2nKOsAUX6oZx0Oj6C+luedzqdFuM6Q9oW54y2WYC2NcW2Wb7JAdYp2aROZvlqlF+S
n/nK9MlKvsNa+t7nerlY6IbN7c/jlHrI/Z4e33ApE3FVullcLunEGmsC6ZEQC/N50a77ji4m
V8/q8v8uFbKzsysdDofroYceci1fvtwUcb61PHJzcysffvhh/fna6tWrr6KoqKjNZuP2K8X7
8EcffdT12GOPeVFSUuJXsxcWFlY+8sgjrqqqKtfjjz/uQZTB3/bgZagU169bt8711FNP6VRW
VgbU7bwOleL6DRs2uDZu3Oj6/ve/H7Db8HJXimvFu6ZnnnmmXW735JNPVm7evNn17LPPtttt
ue3KjlwvAr++siuNGfV+/Xwr9+ve93ftCXFM3NcJOvPe8SmtY/eOk7SO3Tuq86hcO0SazOuX
Xn3Va15Pp7ljkZ9zazrNgZmGed1K55t69LAY72E9awp+zmibBWhbU2yb5ZscYJ2STepklq9G
+SX5ma9Mn6zkazavWw3zeial707lEvP5PIO93kpbzFGmYrUeGXS/GtWGPxjXeZlU5nw/+yST
bDp9+INxnWdtZZ2XSdtAbGuKbV/rvEDqlGxSJ1/rvHzqu3w//SGf8ne20x8yyR+yTfwh08Qf
1HoIf7ilHf7gpDKv8bNPnGSzMgj+4KRtILY1xbYvfwikTskmdfLlD2uo79b46Q9rKP/KdvqD
k/xhtYk/OE38Qa2H8Ifx7fCHSirzVj/7pJJsVgfBH+QCKRDbmmLblz8EUqdkkzr58oet1Hdb
/fSHrZR/dTv9oZL84VkTf6g08Qe1Hhl07xeoP1RTmbf52SfVZLMmCP5QTdtAbGuKbV/+EEid
kk3q5MsftlHfbfPTH7ZR/jXt9Idq8oefmvhDtYk/qPUQ/jCxHf5QQ2Wu9bNPashmXRD8oUbe
XwRgW1Ns+/KHQOqUbFInX/5QS31X66c/1FL+de30hxryhzdM/KHGxB/UemTo73WdlkD9oY7K
/I6ffVJHNvcFwR/qaBuIbU2x7csfAqlTskmdfJVXfRbtjz80UP772ukPdeQP75j4Q52JP6j1
EP5wK+mD9AH5TL9AM38HYAnQdwJpj0KyuYvex3TUdwKxXWdi25++CEX96zqh/qptLYg+LvKN
N9TJn3aV361YW/luxaq8c5Hll9+t7GrluxUrjZ/MNurzvNZiW44ho49m0Lscm+Ebi/OtfGOB
52XBfV6mvpesqqpqVZ9Et3TEl/tS3482jE/lVYrX+LT58HebDx0x5mcc77Yg6p2xLv6UU33/
297nlYG2+WgqZ7qPNjc+r7S18rwy0DYy2g5GvrJOdfSNXjDznUz5pgfQp/5q4WgTLVTbR9VC
s++fgjUG08lm5jUag00DBvj2L36uvXWp5QnuMtQlHMtZSN+Z1QZYTvX7B0U3LP1MNMTqZ9wf
XxVz8FSDr64kvxFjY5GPZ+vGcgbbbzOpr51dYO4w1qUj5XSZ1NvT5vxcR9o8n8rrvE78drGJ
32ZSHfI99/DX1m+d1NeVXcBvjXUJV79dQ+WtDAO/zfHDb5dTeVS/dVId1lA+aSyVM1H3XRv5
8LX040rq++ou4MfGuoSrH2+l8rannMHq92pqq5ou0O/GuoRrv2+j8taEgX6t90O/xLfFsQb9
qqY6iLo8qH9X7NB/LsbOpuk/EZPL9aybomNS12LItsR2DTWuhvyjrgv4urEu4errtVTeuk7U
uDpqq31doN+NdQnXfm+g8u4LA41b6YfG7aLnc6rG1VEdRF2W0BptIruVTeB3x8Z1WlvrNbOf
vbGavFuS5Suk518yrbzvUdebyfSMSV5TxPdT9DyblFTm38T7Cmo/+SqT+Da/6Urb5Wjvt/kZ
PG+Zh/AVGZff5mdcMSt51/w2HwEBAeGbFnJzc4+InwXC7ywCAIDwQ+iz0GlVtx0Ox6FNmza5
jh075jp//jwAAIAwQ+iz0Gmh11K7hZ4fPXrUderUKdfevXsBAACEGUKfhU6rfztErMeFrjc0
NAAAAAhThE4b/95qc3Oza9++fQAAAMIUodPQbgAAgHYDAADoHO1ubGwEAAAQpkC7AQCga2j3
hQsXXPv37wcAABCmCJ2GdgMAALQbAABA52j3wYMHAQAAhCnQbgAA6BraffHiRdehQ4cAAACE
KUKnod0AAADtBgAA0DnaffjwYQAAAGEKtBsAAKDdAAAAOk+7jxw5AgAAIEyBdgMAQNfQ7kuX
LrlOnjwJAAAgTBE6De0GAABoNwAAgM7RbvE35AEAAIQn0G4AAIB2AwAA6DztPn36NAAAgDAF
2g0AAF1Duy9fvuw6c+YMAACAMEXoNLQbAACg3QAAADpHu5uamgAAAIQp0G4AAOg62n327FkA
AABhCrQbAACg3QAAADpHu69cueI6d+4cAACAMEXotKrdZWVlrhMnTug/s4P2AQCA8EPos9Bp
oddSu/Pycj/asmWL6/jx47quAwAACC+EPgudFnrNlLB06dL68vJyfT0OAAAgvBD6LHSaISAg
ICBct2E2ZwonjRPBsXM0oqeSbig/MMZkfzhnEMdGxzXa7tmzhw3j2zg6N5Dys9D5b9H+crpA
po1irGqkcl0SxV08DOHbaE5vOiYu7UdxERaK966a+7oLPL1az1oybLVoSXPZIl7PRSyLFbIS
PeZgxczJcgNot+l3Z5dPsubHinjuhOzyqXoOWazAXRtrhn2YlTWNOyXqLeLOwpyizXxbUVLq
WCaS7IzTj38mzr+0PJZVMZbNy/6r1RusGt9O4Oebn8gun5HCyrUWs5a0y9NFN60T6TeWbLCK
gy7eaCLt+I1s16xf3h8r0ovrJO89JdJt10RLiXQiXs+PNf3t1ZjX/xCnp72zNo69PzevfNqs
j3d8zdtO1Ekcr+fleLqhepW4JmeV3vxMbtX+lW0fYdL2mzW0fajaXhRIjotlyrjopcRnK2NZ
pO+r9Jsan8GJp7wy52VkRPKLF/D4bk4MpUugsRyjjDtG+QsySEuqSFeY3mBfes6PVNJqTGu1
n4UbpX/N/GIwbddyLglfJC0T5b/TElj5T4lrtBYx+zNb76P80VeV+WZD+VPiI9mB1beyw5V3
sJTekWxsnyj2YdlE9sXG6exAxSR+Ppq9eY+djeoVwd4vTGMfrb2DHXx0Ens7exR7a+cZ5nR+
xdL6xfBzqexgxURWt3Qo+/zAh+yD7a8zR24z++N3h7D6nOHstTkD2OnPPmFHGxvYA8u+ZOuH
R7IXbollP5rQjT09Iort2P4Fu/f+z9mO2nPs5Kcfs4x7/85mLmhkk2e/yyZO381S0t9gybf9
mg0a/wsWn/oT1n30C0zT0tSgadq4xMTEcWJLpCYkJKSKLTFWDXw/hadPEVtiDE8/RmyJ0Wrg
+6N4+lFiSwwfMWLEcL4dSdiHJCUlDx3mDnxfGzBw4KCbEhMH8+sG890+8X379rsxIaE/t9Nf
0+Ju6N6jR89evd1Bi4yKjonVummeYLVFaF7B4rVnHA9Rmvd8pOpfgsefdrNE2pfjskBzj7N+
yphU57CBhrlWndMyOes5L1NeJ6lM4rp1WS9OLTz8+6nynBDEOVePIT08qPtmOVfJCj4uprJ5
bD5bzLdRNBbENpLqEk3HYige3UYZA1lD1Jvsq1qWoOSrtmNfasekDrTj25znKK+LlK/ajvJc
fCvtWMrjc1kZn2tK+Zyzkm8dvL7ZrIit4HtZ+kxUwvfE7BZDbSqWHlbaRipbK20jqY0jleMW
ag95LCLEfaD69UilP9S1mPTn/nSsqalJb1fRVkM5oznJPL/JhnZV23EO1U2mL+QJ0+n4COpv
uZZ0Op0W4zpD2hbnMg39JPuoLdvCj4y2zfIVZZwcYJ0mU/4y32EtfeRzXSvTWE3aWMwhannS
qTyL/CxPOtUz00cbyyW52sb+lFmW05hf04ABPvtMnGtvn4n7hLsMdelIOV0m9fa0OT+ntvmi
ANt8EZU3kHKqY1nRQIt6XPUTf+LC/pt0jyYKu5nWN2od5LneVFYbpU8nP15Ea6l5XPNW8BWm
WK3bub7l8n9zud6t4HpXwHGQ3ol5pBttoyg/G8WtFLcq6awK8hpfbdHW2Mikfsr3s58yyZ+c
12hshFLPjHW5VmMjP8A2z6fyOsNgbMRpbl9fzDnBcZiMjcU0l6pjI5PqIOqy0cfYMF8R2PkR
d6qWsVPh97iJ8pFOHTvqcWNeZuOuI+PNSX2/xs++d5KPVnaB8Wasy7Uab2sCbPM1VN7KMBhv
BTR+ltOzhkdMxttyWneq481JdRB1WaLPVwV8HOXzEeS+RzH6f3v9uZLadqufbVtJPlDdBfzZ
WJdr5c9bA2zzrVTe9pTTV79XUxm2+VmGamqrmi7Q78a6XKt+3xZgm2+j8taEgY59RLoknhfs
4PzcRMeeI5uqjlVTHURdHuPcw9cEYp1QzP9z8Fgp/zeHrw1m6CuGfH2lMEJfNczh6/BpnnWC
2RrBbM6PNtFGG7Wpml4+62mvbtZQX9b62Zc15HN1XWD8GOtyrcZPbYBtXkvlrQuibtZRGd7x
swx11Fb7ukC/G+tyLfo90HKKNm+g8u4LA918gu63dvnwG3lugkE366gOoi6/0+/H7Gw218ZS
NpHdrWvndLaQW7iFzeRrwlLOeH5/NU6/D1vF9TPV7/RjeLo0fvwWNon/J/U1xqC1MSbaKfU1
1kSL1eceNlrfqvodzPyjDen9WRerfa/Gu9OzcPl+LF7PO4X/O784x1mYVVxhLyp0jC3PqrBP
nTd/8VR7Ua59hjNv/LftecVF5aX59uKsUgcv8SDedwt54ebYWvxXs7i3qk9fi+8dNLoPkUH6
oQzb+jL2p17cx6bPnSFSf3SvhcVb3c/gvd5p8wMDeH2m8OubjEaO2ljVK1bPs1z5Llb2TU/l
ubu4F79dPyIaII5bvMwRrfGm3kfyXYEa+nDu8KjHnXqPxJJmDFD0wVe4i77CeFkvkfwiYzLZ
0bjnn/DkKdvMYvDfSPIpWad0/SsQC6G/OLXFe3rWpr+dENfojmKWmnuX5pVavImZW1ZQ6lxZ
4LBnF61YmVXsLCkqLFEu9oRo97642KJfrGdpntDqb0Kbvwkj/E0Y6W/CKH8TRvubMObqhDPY
NF5yC/e9R2/Ah1AICF0luIIcHvBMNlaaEDRlr1lr1mxccPRju8d/dWZmuG6lKD7gfdOh1KVl
wtN8nGvW3NiUyesVfbq0+bH0kMG/KywBX2EN+AqUCqVCqVAqlAqlQqlQKpQKpfqmlOq2KZ9W
WfSHcw+ynCUW/WGfWgbjx7Lf5IeU6r58kCweUKofYPdVHvjHMu8Pj+XH3Ma2VV8uqS8nxAuA
nFbaQF4/xKtmVenmcfOg2jP74TJ5TJZd3g8X0g+/yRc50mfEB9FqvuK4WT1GK3kV8f2UINbD
V1mLRfmutF0OfkRrqxxyGAgfncDcP5yQwfOWeYgXSzKuMbvuDxlXTJ9UyP8REBAQEK7jkJub
e0T8Mj78khQAAAg/hD4LnVZ12+FwHNq0aZPr2LFjrvPnzwMAAAgzhD4LnRZ6LbVb6PnRo0dd
p06dcu3duxcAAECYIfRZ6LT6xwrEelzoekNDAwAAgDBF6LTxDzw2Nze79u3bBwAAIEwROg3t
BgAAaDcAAIDO0e7GxkYAAABhyv9j703goyrSvf863dkJe8CwGJqEnQiRZcBRCYxs75/FKBGd
ufhqCB3SEhPMQkCkiX9HFsGXJf8ZZ/y848fre73EGVzmnWEETQQvXmXuDDpBLiDIqMhVLgQJ
6x2BS/+rTj+VVB9OJ32SE+hJ/0q/1Fnq1FNP1VPPU6fP6Q58NwAAtA/fffHiRd+BAwcAAACE
KcJPw3cDAAB8NwAAgJvjuw8dOgQAACBMge8GAID24bsvXbrkO3z4MAAAgDBF+Gn4bgAAgO8G
AABwc3z3kSNHAAAAhCnw3QAAAN8NAADg5vnuo0ePAgAACFPguwEAoH347suXL/tOnToFAAAg
TBF+Gr4bAADguwEAANwc3y3+hjwAAIDwBL4bAADguwEAANw833369GkAAABhCnw3AAC0D999
5coV35kzZwAAAIQpwk/DdwMAAHw3AACAm+O76+vrAQAAhCnw3QAA0H5899mzZwEAAIQp8N0A
AADfDQAA4Ob47qtXr/rOnTsHAAAgTBF+WvXdZWVlvpMnT+rf2UH/AABA+CH8s/DTwl9L371w
Yd7nmzZt8p04cUL36wAAAMIL4Z+Fnxb+milp3rx5e8rLy/X1OAAAgPBC+GfhpxkSEhIS0t9t
msGZyMngRHNcHI3oopQbwA8MN9kfxOnLcdBxjfLdu3ezgTxPpHN9qD5Z7ge0v4gukGVjGasY
olyXSts+nvrzPI7TjY6JS3vStkj3i+eumv+6i7y8qmc1CXY6tNRZbA7Xcw7LYYWsRN9ys2Lm
YXkW+m3KPbnl4535CWI7b0xu+SS9hhxW4NfGmeUa6GT1I+uE3mLbU7igaCPPl5WUuueLIu8m
6se/FudfWpTAKhjL5W3funSdU+P5GH7+wk9zy6ems3KtUawj48oUMUyrRPn1Jeuc4qCPd5oo
O3o92zn9Nw8niPLiOsmfV4ty2zTRU6Kc2N7Dj9V/9kb8W+8k6mXvqk5ke2ctLJ88/Ysd13jf
CZ3E8T28HWtrK5eIaxYs0bufyVwdX9n3TpO+36ih79uq70Uj5LyYr8yLrsr2DGUuCwV60Lko
w/ZUThLVlT07KyuGX3wf397FiadyyTSX45V5x6h+QRb5kgryK0zvsO8azg9RympMa3KchRll
XmMh0Y/ylZzLwhbJl4n23+Ww1v46cY3W6Mw+ZGuCtD/uujbfbmh/elIMO7h0HDvivZOld4th
t3WPZZ+WjWXfrp/CDi4bz8/Hse0PuNjQrtFsb2EG+3zlnezQ8vHsg9yh7P13zzCP53uW0TOe
nxvBDi0by2rmDWDfHPyUfbztLebOu8De+0l/tmfBIPbmzN7s9NdfsmP7a9kj879jawbFsBdG
JbAXx3RgawfHsh3bvmUPPvwN21F9jp366guW9eBf2bT79rMJM/7Exk7ZxdIz32Zpd7zO+o5+
lSWN+BXrNOwFpmkZatI0bWRKSspIkRMjkpOTR4icuE1NfD+dl08XOTGclx8ucmKYmvj+UF5+
qMiJQYMHDx7E8yGEq39qatqAgf7E97Xeffr0vTUlpR+/rh/f7Z7Uo0fPW5KTe3E5vTQtsWOn
zp27dO3mT1pMbFx8gtZBa0jOqGgtIDkC9ozzIVYLjEeq/0tusKddLIX25bws0PzzrKcyJ9UY
1scQa9WYls1Zw3mZ6jpFbRLXrcr5xaTCI3+YJM8Jhzjz+jmkp0d12yznXnIZnxeT2Gx2L5vL
81iaCyKPIT8QR8fiaTuumTZaWUPsMdlXfVmyUq/ajz2oH1Nb0Y8fcH5GdV2ietV+lOeSmujH
Ur49i5XxWFPKY85inru5vrmsiD3O93L0SFTC90R0i6c+dZBuDmU/ho7FEHHKtiwbrRyLbuMx
UO16iDIe6lpM2nMvOlZfX6/3q+yrYZw0zgRDv6r9OFNZA4ryAziZdHwwjbc87/F4HMZ1hpQt
zhllM4uyNUW2Wb1pFnVKM9HJrF6N6ksNsV5ZPk2pd2Dj2AddLxcLvxHlt+eRih5yv0uDbfiU
QFyRabYtl3RijTWG/JFwFuZx0aXbju5Mro/q8v92lXJzc71ut9v32GOP+RYtWmSKON9UHXl5
ed4nnnhC/3xt6dKl11FUVNRst3H5XvE8fPny5b6nnnoqgJKSkpC6vbCw0Pvkk0/6KioqfE8/
/XQDog2h9gdvg1dcv2rVKt/q1at1vF6vpWHnOnjF9evWrfOtX7/e98wzz1g2G95ur7hWPGt6
7rnnWmR2zz77rHfjxo2+559/vsVmy2V7W3O9SPx6b3uaM+r9+vkm7tcD7+9akhKZuK8T3Mx7
x9Va6+4dx2utu3dU46hcO8SYxPXLb7wRENczKXbMCTG2ZlIMzDbEdSedr+/c2WG8h21YU/Bz
RtnMomxNkW1Wb5pFndJMdDKrV6P6UkOsV5ZPU+o1i+tOQ1zPpvKdqF0ins82yOum9MVMJRSr
emTR/WpsM/ZgXOdlU5vzQxyTbJLpCWIPxnWes4l1XjblVmRriuxg6zwrOqWZ6BRsnZdPY5cf
oj3kU/2eFtpDNtlDrok9ZJvYg6qHsIdRLbAHD7V5RYhj4iGZXhvswUO5FdmaIjuYPVjRKc1E
p2D2sILGbkWI9rCC6ve20B48ZA9LTezBY2IPqh7CHka3wB681ObNIY6Jl2RW2mAPcoFkRbam
yA5mD1Z0SjPRKZg9bKax2xyiPWym+itbaA9esofnTezBa2IPqh5ZdO9n1R4qqc1bQhyTSpJZ
ZYM9VFJuRbamyA5mD1Z0SjPRKZg9bKGx2xKiPWyh+qtaaA+VZA+vmNhDpYk9qHoIexjbAnuo
ojZXhzgmVSSzxgZ7qJL3FxZka4rsYPZgRac0E52C2UM1jV11iPZQTfXXtNAeqsge3jaxhyoT
e1D1yNKf63ocVu2hhtr8UYhjUkMy99lgDzWUW5GtKbKD2YMVndJMdArWXvWz6FDsoZbq39dC
e6ghe/jIxB5qTOxB1UPYwzjyD9IG5Gf6BZr5MwCHRdux0h+FJHMnPY9pre1YkV1jIjuUsWgL
/Wtugv6qbM1GGxf1Jhl0CqVf5XsrzibeW3Eqz1xk++V7KzubeG/FSfMnuxl9fq41ypZzyGij
WfQsJ8rwjsX5Jt6xwOdl9n5epj6XrKioaNI/iWFpjS33oLEfZpifyqOUgPkZFcTeo4L4EWN9
xvkeZaO/M+oSSjvV578t/bzSap8Po3ZmBulz4+eVUU18Xmm1j4yy7ahX6lRD7+jZWe8EqjfT
wpiG6guHmfhCtX9UX2j2/pNdczCTZGbfoDlY37t3cPvi51qqSzUvcLdBl3BsZyG9Z1ZtsZ3q
+w+K33D0NPEhzhC3Q7FVEYMnGWx1MdmNmBtzgny2bmyn3XabTWPtaQexw6hLa9rpM9G7oc/5
udb0eT611/N3YrdzTew2m3TIb7iHv7F266Gx9rYDuzXqEq52u4La6w0Du10Qgt0uovaodush
HVZQPRlsBGesbrtRZMM30o69NPaV7cCOjbqEqx1vpva2pJ12jXsl9VVVOxh3oy7hOu5bqL1V
YeC/1oTgv8S7xQkG/1VJOghdHtXfK3br34txscn6N2LyuD/roPgx6dfiSbYk6gb6uCqyj5p2
YOtGXcLV1qupvTU30cfVUF/tawfjbtQlXMe9ltq7Lwx83OIQfNxO+nxO9XE1pIPQ5SFao41l
49gYfndsXKc1t14z++6N0+TZkmxfIX3+JcvK+x51vZlGnzHJa4r4frpeZ71Syvyd+GBJHadg
bRLv5tdfbb4dLX03P4vXLesQtiK35bv5WVfNWt4+381HQkJCirSUl5d3VHwXCL9ZBAAA4Yfw
z8JPq37b7XYf3rBhg+/48eO+8+fPAwAACDOEfxZ+Wvhr6buFPz927Jivrq7O98knnwAAAAgz
hH8Wflr92yFiPS78em1tLQAAgDBF+Gnj31u9cOGCb9++fQAAAMIU4afhuwEAAL4bAADAzfHd
+/fvBwAAEKbAdwMAQPvw3RcvXvQdOHAAAABAmCL8NHw3AADAdwMAALg5vvvQoUMAAADCFPhu
AABoH7770qVLvsOHDwMAAAhThJ+G7wYAAPhuAAAAN8d3HzlyBAAAQJgC3w0AAPDdAAAAbp7v
Pnr0KAAAgDAFvhsAANqH7758+bLv1KlTAAAAwhThp+G7AQAAvhsAAMDN8d3ib8gDAAAIT+C7
AQAAvhsAAMDN892nT58GAAAQpsB3AwBA+/DdV65c8Z05cwYAAECYIvw0fDcAAMB3AwAAuDm+
u76+HgAAQJgC3w0AAO3Hd589exYAAECYAt8NAADw3QAAAG6O77569arv3LlzAAAAwhThp1Xf
XVZW5jt58qT+nR30DwAAhB/CPws/Lfy19N0LF+Z9vmnTJt+JEyd0vw4AACC8EP5Z+Gnhr5mS
5s2bt6e8vFxfjwMAAAgvhH8WfpohISEhIf3dphmciZwMTjTHxdGILkq5AfzAcJP9QZy+nCg6
rlG+e/duNpDniXSuD9XnoPM/oP1FdIEsG8tYxRDlulTa9vHUn+dxnG50TFzak7ZFul88d9X8
113k5VU9q0mw06GlzmJzuJ5zWA4rZCX6lpsVMw/Ls9BvU+7JLR/vzE8Q23ljcssn6TXksAK/
Ns4s10Anqx9ZJ/QW257CBUUbeb6spNQ9XxR5N1E//rU4/9KiBFbBWC5v+9al65waz8fw8xd+
mls+NZ2Va41iHRlXpohhWiXKry9Z5xQHfbzTRNnR69nO6b95OEGUF9dJ/rxalNumiZ4S5cT2
Hn6s/rM34t96J1Eve1d1Its7a2H55Olf7LjG+07oJI7v4e1YW1u5RFyzYIne/Uzm6vjKvo82
6fuNGvq+rfpeNEjOi/nKvOiqbM9Q5rIo30MZN3V7KieJ6sqenZUVwy++j2/v4sRTuWSay/HK
vGNUvyCLfEkF+RWmd9h3DeeHKGU1pjU5zsKMMq+xkOhH+UrOZWGL5MtE++9yWGt/nbhGa3Rm
H7I1Qdofd12bbze0Pz0phh1cOo4d8d7J0rvFsNu6x7JPy8ayb9dPYQeXjefn49j2B1xsaNdo
trcwg32+8k52aPl49kHuUPb+u2eYx/M9y+gZz8+NYIeWjWU18wawbw5+yj7e9hZz511g7/2k
P9uzYBB7c2ZvdvrrL9mx/bXskfnfsTWDYtgLoxLYi2M6sLWDY9mObd+yBx/+hu2oPsdOffUF
y3rwr2zaffvZhBl/YmOn7GLpmW+ztDteZ31Hv8qSRvyKdRr2AtO0DDVpmjYyJSVlpMiJEcnJ
ySNETtymJr6fzsuni5wYzssPFzkxTE18fygvP1TkxKDBgwcP4vkQwtU/NTVtwEB/4vta7z59
+t6aktKPX9eP73ZP6tGj5y3Jyb24nF6altixU+fOXbp28yctJjYuPkHroDUkZ1S0FpAcAXvG
+RCrBcYj1f8lN9jTLpZC+3JeFmj+edZTmZNqDOtjiLVqTMvmrOG8THWdojaJ61bl/GJS4ZE/
TJLnhEOcef0c0tOjum2Wcy+5jM+LSWw2u5fN5XkszQWRx5AucXQsnrbjmmmjlTXEHpN91Zcl
K/Wq/diD+jG1Ff34AednVNclqlftR3kuqYl+LOXbs1gZjzWlPOYs5rmb65vLitjjfC9Hj0Ql
fE9Et3jqU7H0cFIeo+ROymOoj2OU4w7qD3ksuo3HQLXrIcp4qGsxac+96Fh9fb3er6KvBnCG
cdJ4fRMM/ar240zSTZYv5AUz6fhgGm+5lvR4PA7jOkPKFueyDeMkx6g52cKOjLLN6hVtnGBR
pwlUv6x3YOMYBV3XyjJOkz4WMURtTya1Z06I7ckkPbOD9LFckqt9HEqbZTuN9dX37h10zMS5
lo6ZuE+426BLa9rpM9G7oc/5ObXP51js8znUXivtVOey4gMd6nHVTkLZFvK30z2aaOxGWt+o
Oshz3aitUVQ+k+x4Dq2lZnOf9zhfYYrVuov7tzz+bx73d49zf1fAcZO/E3GkA+WxVF8UbTtp
26mUcyrIa4L1RXNzI5vGKT/Eccome/LcoLnRlv7MqMuNmhv5Fvs8n9rrCYO5kaj5bX0u5yTH
bTI35lIsVedGNukgdFkfZG6Yrwhc/Ii/VOPcWRbyvIkNUk6dO+pxY11m8641881DY78ixLH3
kI1628F8M+pyo+bbCot9voLa6w2D+VZA82cRfdbwpMl8W0TrTnW+eUgHoctDerwq4PMon88g
/z2K0f5bas9e6tvNIfatl2ygsh3Ys1GXG2XPmy32+WZqb0vaGWzcK6kNW0JsQyX1VVU7GHej
Ljdq3LdY7PMt1N6qMPBjn5NfEp8X7OD8k4kf+xnJVP1YJekgdHmK8wBfE4h1QjH/z823Svm/
C/jaYKq+YsjXVwqD9VXDTL4On9ywTjBbI5jF/DgT3xhFfaqWl5/1tNRvVtFYVoc4llVkczXt
YP4YdblR86faYp9XU3trbPSbNdSGj0JsQw311b52MO5GXW7EuFttp+jzWmrvvjDwmz+l+62d
QexGnhtj8Js1pIPQ5ff6/ZiLzeC+sZSNZffovnMKu59LGMWm8TVhKWc0v78aqd+HLeH+c0TI
5Yfzchn8+Cg2nv8n/Wu8wdfGm/hO6V8TTHyx+rlHFK1vVf9tZ/1xhvKhrIvVsVe3O9Fn4fL5
WJJedzr/997iBZ7CnOJlrqJC923lOctck2bfO3eSqyjPNdWzcPSPXAuLi8pL813FOaVu3uK+
fOzu542bGdVov8JAfcpzYp/hmXFbJY3uQ2SSdijTlh6M/WtXbmNTZk0VpT9/0MGSnP7P4AOe
afMDvbk+E/n19UYhx6JYxWvOhs9y5bNYOTZdlM/dxb34D/Uj3flcT+QSr3BEb2zXx0g+K1BT
d86dem0aPbG4Sx+VBPIbvRUfESzdzW1cWE2uUnaBsu1WtvOU8XlZfxrlIIvLbUbSAnb9KKvJ
3cz5vGbOT6C+0fhsPdnQB3KcHYY5F0PzQI5Dpv7mioPQH/ZGJTXIidKfqIhrdOM2K81nhBZQ
WozFrLKCUs/iArcrt+jxxTnFnpKiwhLl4oYU598XFzv0i/UqzQs6Qy0YFWrB6FALxoRaMDbU
gnGhFoy/vuBUNpm33MHny/KOeHkLCam9JJ/N6ZGG5bWTAoKm7F3QLmhR3OHox3aN/v7MtHDN
pVN8JPBGSdGlMeBpQc5d0PxEKcHrlw21/XPDCyUi9SOi9A9dyhS3LJYw1+j2YKrdw//enON/
fGzgOP2VsWs+1rNRtGYQneVaklNQ5rZPdI/0/zP+g45PTvCL1hTRDkX0LWKxKFa4pUWlOQUB
wb21KVlqfUujaKeZ6BLPwkJPnic3p7DU1gZwrRXRUYpo8QrOjOLSsfcUu6fcnz1qWk5pzui8
kXmuJSUjXCbHh8/IGDVq/PjmJQ743f88lklapzSKjg5R9IOeggWu0mWL3cy66Ir6Z/+dRGuK
6Birol1SYuii65f+519JtEMRHdu8aBJhUN6C6I2nCj/e6RftVETHtVB0g/IhiH50271vk+go
RXS8QXRj3eaSWiL6yy4f/Qt1eLQiOkER3bstLPybdz/bU3wtRc7r3o2iO4QousUW3qv62bnj
hnQj0ZoiOtGqaKsW3nFY2T9/1r03iXYoojs2L7p1Fv6ib8vxJVvjSbRTEd2phaJDNjP3tM1r
F/z6PJlZlCK6s0G07Rb+8ds1mWvf8EkLV0R3UUT3bwsL33yf59NfVWdT0GT9G0V3DVF0iy28
/H89d/yrF3pJH66I7mZVtFULf+f5y2zh9pdIa4ciunvzoltn4f/xjx9NKJ+4iLR2KqKTWig6
ZDP7vLbs1Wcf2istXBHdwyDadgvv8drmbNeK16WFK6J7KqLFi7E/Ki4qL7xtalFxybLSfLdr
KmutaP9txJmVZOF9GkXf0rToLJtFa4roZKPonOLSAndpKdfXHtGrJh8d3r2HjFwORXSvYKKz
bBLdMbqg88zRcqydiujeBtH3u0qeKMspdjO7RPfMveOd+r3fSAtXRPdRRN8qnmm4soqL5ufM
9xR4SpeJNXlhWUGBazprxSqlbu4/LftWOtJbG0X3bU50TkGpu7gwp9SzxM1bYF30/W8n1vp8
D8mlgiL6VoPo+7mQIiFycUMLPO4S1nLRgXcfDkV0ikH0ZE9enrvYXZjrdnkKXZP+xz25rHWi
75r45f87T5solwq3vqZ/bmy8tZai1dtrmUK7wmH5CqflK9AqtAqtQqvQKrQKrUKr0Cq0KlJa
9dXEOyr8ny3G6x+BzC4qLOB3CHmeUvke0j1NvHsUFeRRmW23FX8nj11/SN8Ojub9qDGf/u6R
+NZgsmF81NT47pG4O75L/46wfFejL41asMeybza8paOWTmniirv179RG69/+EDeFAi9ti7RS
2a6gbTGGW2lbjOHL+nu68gmTWtM1E4my9sY6ApOUGOzRtWyFtAPj+a3NXN+aN5kaHgPHKfbO
xPszotyUJ8rEnXxhkFeftIALxAe52TnzC9xiPhW7S8oKSksMkvRZlMxcjoALRevuKSte4jZr
VzKLczZbuiFFzCtNrP8u9u1XeA0ECam9phNOxWvG+vNHlHNNJUfA4wEHJ5rihho/hIOhuDJx
w8SACnbNF/sv//KXr2UG1pw80WTf+CqSMTV33iTVZzZXQjpGkUcb4iILskJgytpjWkW6sg6V
+fAuTP9Vrq1K9JdXT68oVvpWr03XSGu+zXo58TRf9Okfm9ZN7SV9exn9Fh6X/NIfV670+f8t
0b9p3hi1KzJVzeX+/9Cv/fHdP84Y5l66eMiiYQ8N7ZjAsvRwM2Xp4qJCd2GpJ6dAvoPvliH/
//p75Hf6Vyuy8z0lDadcuTmFrvluV35OMV/0Fokl9AhXdvEyV15ZSYmncKGr3MMrEk9aPIUe
vW79DSxXXlGxa8YI9nvdkIUG97HfS9tGQkJC+jtJ9/ud4xz93uDHGeJnCLIDfjdLpt8G/Obf
B3SfrAnnrLtA1mHvn2dO8G+uZ3Xx/jiUnVPGTgkfPjeGLYw6WP6L/29/OXfht4+cMfyh2x6K
1E6/feSiyLa6GWYHhb1MLiqbXyAib7bncTdrsJeZs4eMGhq5NlNQKNRfBHtBQkJCurnJpq9s
/z1X4zDwlP66+Ua2iT3K78hTOeODPNlqWAVSUm+ZrV8xfeLcigRq0Qo9f9B09fqQ6dEfN34B
7OVf/nJHpr7l6tr1HzOr9E8kHE30gBa0vcakrpvbqt651A8ar9uLftA/YVqJfmBOXncF+oGJ
r7xubU0/sA9O/frvuh+mTfx5hf9Lji9wL+2/WrxeIL6h9GY0Y5f4yb16/wTKEq+gN/Xpqm3p
FxXd9DAkvq/clzkaHgukN/cBb8cRDV1RqXeMJakTd+jz4x3WhSTKR8WufHfB4iauvCGdgo8s
blqaKMb/h/dPmfaIMtKP+Ec6Uj6y2DHxPxv+yID84Z+fTwz2DfqfMPFSjNk36IWTWSGdaobN
8+meZ9acn7b5sP4kakWAaM0gepHdU/nDlzb2Gvi3/yDRGgv8Br0qWnwQaqvou1/556q02f9F
oh0s8Bv0quhAA7VB9K8cXV/xDK4n0U5FtLiJkKLj/WNtr+jfrIq6/8nVH8mxjg8umo+1vaJr
p/16+Z6vfifHOj7wdwOkaK0ttF7qmbBq1MLXd5LWWuDvBqiibdf6o94/rts/5AuptRb4uwGq
aGHhtoou+OPAft92PCctXAv83QBVtO0W/t7Zh+fdF/uf0sK1wN8NkKIdbTHWhz11fd7Nr5MW
7gj83QBVtO1jPeStC9Vf/IMUrTkCfzdAFW37WP97398WP1Xo/8NZfKwdgb8boIq2fawXbui1
6fGPLsmxdpi7FBEFJ7sXFrvdJfpbtnxjQdHjtqwEk0hrlhhcdMMXP+0SvfO3aT/6etYZOdZN
iJ40v6SooKzU7ZpT9rhQfY7ekJKWi/6zZ0/Zf+0eLMe6CdFzlo1YyuwU/fHJybcv+vXf5Fgn
Bv5GhBDtbVyl2Ct61y+/2P6/T/5FF+0NWKV0NIjm89pe0Uf/4+vq3z77byRaXaV0MojWVyl2
io45826n/5rVfaJftLpK6WwQHTivbRD99fI/vRm1O4FEm61SvKarFBtE/6D7gT4/P/A7Odbx
wUUH+nAbRPftXTn02sY35VjHB/4yhhSttYXWe7YMuXPha29JrbXAX8ZQRduu9ZpuKxat+65K
aq0F/jKGKjowctkgunTxtb1Xv4iWFq4F/jKGKtp2Cx/4lxeH3TnnGmmtrlKSFNGOthjr/xV/
8ZUvfn1UjrUj8JcxVNG2j/X6e0rv/XLhQTnWjsBfxlBF2z7WS3I/PD9u7Rg51o7AX8ZQRds+
1nPPP/h4x6Xp0ps5zF1KkFVK60SrqxSv6SrFG3yV0jrRP/zJ+/8z95Vv5Vg3Idr2VUrS737r
LPO9R6IdTYi2fZWy8ejnZ2ad2i3ndWLgr6AI0SvbapVyNaF26fSPv9JFrwxYpfQyiLZ9lRL3
xy/7/uG/j5FodZXS2yDa9lXKvB99nfThxcskWl2l9DGItn1eV5burzv75jkSbbZKWdlWq5Sz
jx7t+sYHf5FjHR9ctO0+/L4NP4z9S+k2Odbxgb/9IkW3ySolbtstp7f4anaS1lrgb7+oom3X
us+xrn89mXFIaq0F/vaLKtr2yDXtgYx/vO+j89LCFdH9DKJtt/BLvX/fa+KiU9LCFdEuRXSb
rFJmrnrlv370htRaXaX0N4i2fawd/7j93y4d+0851oroVINo28e6x89L990+zL8iXRmwSkkz
iLZ9rFdvP1/0gwf/W461w9yltPkqZaXpKmVlW61StOjf/emj2u/kWDch2vZVyqjPJs6Mix0i
x7oJ0bavUu5ZVfUPrr1/k2OtiB5AZlbRVquU/Dd//lzC6iO66IqAVcpAg2jbVylvsdxB31X/
nESrq5RBBtG2r1Je/dnJb5746dSJftHqKmWwQbTt8/pb36A3xo3LJNFmq5SKtlqlnMuI+9sD
/T+QYx0fXLTtPvyjf3jv4rlz2+VYK6KHKB3eJquUrIu/if0s70WptRI0hxpE26719mfGrvr4
h3t3ktaK6GEG0bZHrjmVRQPuzO4oLVwRPdwg2nYLL/jvpwbemx0lLVwRna6IbpNVynv3/vhf
Pv3dSTnWStC8zSDa9rE+1//b2OiyWmnhiugRBtG2j7X6U58VAauUkQbRto91oGizVUrFjVil
VJiuUiraapWy69Wd/88f3n9OjnUTom1fpdSMW5ow5W/SzBxNiLZ9lXLt/3befMsDH5NodZWS
QWa2ta1WKfv/T8Wr0+r999dbA1YptxtE275Kmf5FRdYLb+ze6RetrlJGGUTbvkp5d/ojbz7l
7L3LL1pdpYw2iLZ9Xv/+8ymjtLhuJNpslbK1rVYpw7v884aC17bLsY4PLtp2H74n+o/9e3f5
FxKtrlLGKB3eJquUL0/87/V3uDdJrZWgOdYg2natp1ZtT/q31V9KC1dE/8Aguk0j19aAVco4
g+g2jVxbA1Yp4xXRbbJKeb66z2e3ur+UY60EzTsMou1/unfsy99+//6/SQtXRP/QINr2sY7u
smFH6vfXyMzUVcqdBtG2j3Xp467DnZZeJNFmq5StN2KVstV0lbK1rVYpq7Yf39q9Y60c6yZE
275K8ZS8XP3vyb8j0Y4mRNu+Spn8744Xv5u8k0Q7E81f8G8Qrbx9LFNoVzgsX+G0fAVahVah
VWgVWoVWoVVoFVqFVkVKq+6gn+buyo7rNX1V8Si76ykH+/1yR0BbBvCdPYb7enYDkmhDgbKf
xg98pOxv6cHYv3ZlzDVl1lRRWrQ7ycnoj80rb6jRdwEn8uvrjUKORbGK15z6KxZxrPHP4smf
bO6i6N/BsC//tpl4z03+TTvRZvnn1kRfJ9A1MqVQeWPfyj/bJbp2IG2LD4HFr0AuaKIP5PX9
AzSryDTfNk+qPNkPqj7ymGy7/FnONZr/UddgOt7wc5z19QH1iuNmegxT6lqr+Z9d2aVHsLaK
HxL9Syet2XbwI1pz7ZDToIA+vXxZfE7P65Z1iOeucltjLt0eMjppZp+Uyf+RkJCQkJCaTXl5
eUfLysp8ixcvBgAAEKGIOCDigRof3G734Q0bNviOHz/uO3/+PAAAgAhFxAERD0RckDFCxI1j
x4756urqfJ988gkAAIAIRcQBEQ9EXJAxQtxfiPhRW1sLAAAgwhHxQMQFNUZcuHDBt2/fPgAA
ABGOiAeIEQAAABAjAAAA2BEj9u/fDwAAIMJBjAAAAGAlRly8eNF34MABAAAAEY6IB4gRAAAA
ECMAAADYESMOHToEAAAgwkGMAAAAYCVGXLp0yXf48GEAAAARjogHiBEAAAAQIwAAANgRI44c
OQIAACDCQYwAAACAGAEAAMCuGHH06FEAAAARDmIEAAAAKzHi8uXLvlOnTgEAAIhwRDxAjAAA
AIAYAQAAwI4YUVdXBwAAIMJBjAAAAIAYAQAAwK4Ycfr0aQAAABEOYgQAAAArMeLKlSu+M2fO
AAAAiHBEPECMAAAAgBgBAADAjhhRX18PAAAgwkGMAAAAYDVGnD17FgAAQISDGAEAAAAxAgAA
gB0x4urVq75z584BAACIcEQ8UGNEWVmZ7+TJk/p369A/AAAQuYg4IOKBiAsyRixcmPf5pk2b
fCdOnNDjBwAAgMhExAERD0RcYEqaN2/envLycv3+AgAAQGQi4oCIBwwJCQkJCamZNIMzkZPB
iea4OBrRRSk3gB8YbrI/iNOX46DjGuW7d+9mA3meSOf6UH2y3A9o/1m6QJaNZaxiiHJdKm37
eOrP8zhONzomLu1J2yLdL56/a/7rLvLyqp7VJNjp0FJnsTlczzkshxWyEn3LzYqZh+VZ6Lcp
9+SWj3fmJ4jtvDG55ZP0GnJYgV8bZ5ZroJPVj6wTeottT+GCoo08X1ZS6p4virybqB//Wpx/
aVECq2Asl7d969J1To3nY/j5Cz/NLZ+azsq1RrGOjCtTxDCtEuXXl6xzioM+3mmi7Oj1bOf0
3zycIMqL6yR/Xi3KbdNET4lyYnsPP1b/2Rvxb72TqJe9qzqR7Z21sHzy9C92XON9J3QSx/fw
dqytrVwirlmwRO9+JnN1fGXfO036fqOGvm+rvheNkPNivjIvuirbM5S5LBToQeeiDNtTOUlU
V/bsrKwYfvF9fHsXJ57KJdNcjlfmHaP6BVnkSyrIrzC9w75rOD9EKasxrclxFmaUeY2FRD/K
V3IuC1skXybaf5fDWvvrxDVaozP7kK0J0v6469p8u6H96Ukx7ODSceyI906W3i2G3dY9ln1a
NpZ9u34KO7hsPD8fx7Y/4GJDu0azvYUZ7POVd7JDy8ezD3KHsvffPcM8nu9ZRs94fm4EO7Rs
LKuZN4B9c/BT9vG2t5g77wJ77yf92Z4Fg9ibM3uz019/yY7tr2WPzP+OrRkUw14YlcBeHNOB
rR0cy3Zs+5Y9+PA3bEf1OXbqqy9Y1oN/ZdPu288mzPgTGztlF0vPfJul3fE66zv6VZY04les
07AXmKZlqEnTtJEpKSkjRU6MSE5OHiFy4jY18f10Xj5d5MRwXn64yIlhauL7Q3n5oSInBg0e
PHgQz4cQrv6pqWkDBvoT39d69+nT99aUlH78un58t3tSjx49b0lO7sXl9NK0xI6dOnfu0rWb
P2kxsXHxCVoHrSE5o6K1gOQI2DPOh1gtMB6p/i+5wZ52sRTal/NyleafZz2VOanGsD6GWKvG
tGzOGs7rVNffqE3iulU5v5hUeOQPk+Q54RBnXj+H9PSobpvl3Esu4/NiEpvN7mVzeR5Lc0Hk
MeQH4uhYPG3HNdNGK2uIPSb7qi9LVupV+7EH9WNqK/rxA84rVJdT89er9qM8l9REP5by7Vms
jMeaUh5zFvPczfXNZUXscb6Xo0eiEr4nols89amDdHMo+zF0LIaIU7Zl2WjlWHQbj4Fq10OU
8VDXYtKee9Gx+vp6vV9lXw3jpHEmGPpV7ceZyhpQlB/AyaTjg2m85XmPx+MwrjOkbHHOKJtZ
lK0pss3qTbOoU5qJTmb1alRfaoj1yvJpSr0DG8c+6Hq5mOcvR/nteaSih9zv0mAbPiUQV2Sa
bcslnVhjjRH1Mr+zMI+LLt12dGdyfVSX/7erlJub63W73b7HHnvMt2jRIlPE+abqyMvL8z7x
xBP653hLly69jqKioma7jcv3ivcIli9f7nvqqacCKCkpCanbCwsLvU8++aSvoqLC9/TTTzcg
2hBqf/A2eMX1q1at8q1evVrH6/VaGnaug1dcv27dOt/69et9zzzzjGWz4e32imvFs7Pnnnuu
RWb37LPPejdu3Oh7/vnnW2y2XLa3NdeLxK/3tqc5o96vn2/ifj3w/q4lKZGJ+zrBzbx3XK21
7t5xvNa6e0c1jsq1Q4xJXL/8xhsBcT2TYsecEGNrJsXAbENcd9L5+s6dHcZ72IY1BT9nlM0s
ytYU2Wb1plnUKc1EJ7N6NaovNcR6Zfk0pV6zuO40xPVsKt+J2iXi+WyDvG5KX8xUQrGqRxbd
r8Y2Yw/GdV42tTk/xDHJJpmeIPZgXOc5m1jnZVNuRbamyA62zrOiU5qJTsHWefk0dvkh2kM+
1e9poT1kkz3kmthDtok9qHoIexjVAnvwUJtXhDgmHpLptcEePJRbka0psoPZgxWd0kx0CmYP
K2jsVoRoDyuofm8L7cFD9rDUxB48Jvag6iHsYXQL7MFLbd4c4ph4SWalDfYgF0hWZGuK7GD2
YEWnNBOdgtnDZhq7zSHaw2aqv7KF9uAle3jexB68Jvag6pFF935W7aGS2rwlxDGpJJlVNthD
JeVWZGuK7GD2YEWnNBOdgtnDFhq7LSHawxaqv6qF9lBJ9vCKiT1UmtiDqoewh7EtsIcqanN1
iGNSRTJrbLCHKnl/YUG2psgOZg9WdEoz0SmYPVTT2FWHaA/VVH9NC+2hiuzhbRN7qDKxB1WP
LHqua9UeaqjNH4U4JjUkc58N9lBDuRXZmiI7mD1Y0SnNRKdg7VU/iw7FHmqp/n0ttIcasoeP
TOyhxsQeVD2EPYwje5A2ID/TX6WZPwNwWLQdK/2xhmR+Rs9jWms7VmQfNJEdyli0hf4Hb4L+
qmzNRhsX9SYZdAqlX+V7K84m3ltxKs9cZPvleyufNfHeipPmT3Yz+rylNcqWc8hoo1n0LCfK
8I7F+SbescDnZfZ+XqY+l6yoqGjSP4lhaY0t96CxH2aYn8qjlID5GRXE3qOC+BFjfcb5HmWj
vzPqEko71ee/Lf280mqfD6N2Zgbpc+PnlVFNfF5ptY+Msu2oV+p0kN7Rs7PeCVRvpoUxDdUX
DjPxhWr/qL7Q7P0nu+ZgJsnMvkFzsL537+D2xc+1VJcDvMDdBl3CsZ1r6D2zAxbbqb7/oPgN
R08TH+IMcTsUW32O70wy2OpzZDdibswJ8tm6sZ122202jbWnHcQOoy6taafPRO+GPufnWtPn
+dReTxjY7UMh2O1cartqt9mkQ36D3WbodnsjbddD4+1tB7Zr1CVcbXcFtdcbBra7IATbXUTt
UW3XQzqsoHoy2AjOWN12o8iGb6Qde2nsK9uBHRt1CVc73kztbUk77Rr3SuqrqnYw7kZdwnXc
t1B7q8LAf60JwX/9jDW+oy39VyXpIHR5VH+32K1/N8bFJuvfisnj/qyD4sekX4sn2ZKoG+jj
qsg+atqBrRt1CVdbr6b21txEH1dDfbWvHYy7UZdwHfdaau++MPBxi0PwcTvpMzrVx9WQDrV0
jyLWaGPYOHYHG33dOq259ZrZ92+cJs+XZPvW0Gdgsqy8Z1fXm2n0OZO8Zi3fT9frrFdKmb8X
Hyyp4xSsTeL9/L900pptR0vfz8/gdcs6hK3Ibfl+fkYns+/ftc/385GQkJCQ2ibl5eUdFd87
wu8wAQBA5CLigIgHanxwu92HN2zY4Dt+/Ljv/PnzAAAAIhQRB0Q8EHFBxggRN44dO+arq6vz
ffLJJwAAACIUEQdEPFD/Lo64vxDxo7a2FgAAQIQj4oHxbzBfuHDBt2/fPgAAABGOiAeIEQAA
ABAjAAAA2BEj9u/fDwAAIMJBjAAAAGAlRly8eNF34MABAAAAEY6IB4gRAAAAECMAAADYESMO
HToEAAAgwkGMAAAAYCVGXLp0yXf48GEAAAARjogHiBEAAAAQIwAAANgRI44cOQIAACDCQYwA
AACAGAEAAMCuGHH06FEAAAARDmIEAAAAKzHi8uXLvlOnTgEAAIhwRDxAjAAAAIAYAQAAwI4Y
UVdXBwAAIMJBjAAAAIAYAQAAwK4Ycfr0aQAAABEOYgQAAAArMeLKlSu+M2fOAAAAiHBEPECM
AAAAgBgBAADAjhhRX18PAAAgwkGMAAAAYDVGnD17FgAAQISDGAEAAAAxAgAAgB0x4urVq75z
584BAACIcEQ8UGNEWVmZ7+TJk/p369A/AAAQuYg4IOKBiAsyRixcmPf5pk2bfCdOnNDjBwAA
gMhExAERD0RcYEqaN2/envLycv3+AgAAQGQi4oCIBwwJCQkJCamZNIMzkZPBiea4OBrRRSk3
gB8YbrI/iNOXE0XHNcp3797NBvI8kc71ofocdP4HtP8sXSDLxjJWMUS5LpW2fTz153kcpxsd
E5f2pG2R7hfP3zX/dRd5eVXPahLsdGips9gcrucclsMKWYm+5WbFzMPyLPTblHtyy8c78xPE
dt6Y3PJJeg05rMCvjTPLNdDJ6kfWCb3FtqdwQdFGni8rKXXPF0XeTdSPfy3Ov7QogVUwlsvb
vnXpOqfG8zH8/IWf5pZPTWflWqNYR8aVKWKYVony60vWOcVBH+80UXb0erZz+m8eThDlxXWS
P68W5bZpoqdEObG9hx+r/+yN+LfeSdTL3lWdyPbOWlg+efoXO67xvhM6ieN7eDvW1lYuEdcs
WKJ3P5O5Or6y76NN+n6jhr5vq74XDZLzYr4yL7oq2zOUuSzK91DGTd2eykmiurJnZ2XF8Ivv
49u7OPFULpnmcrwy7xjVL8giX1JBfoXpHfZdw/khSlmNaU2OszCjzGssJPpRvpJzWdgi+TLR
/rsc1tpfJ67RGp3Zh2xNkPbHXdfm2w3tT0+KYQeXjmNHvHey9G4x7LbusezTsrHs2/VT2MFl
4/n5OLb9ARcb2jWa7S3MYJ+vvJMdWj6efZA7lL3/7hnm8XzPMnrG83Mj2KFlY1nNvAHsm4Of
so+3vcXceRfYez/pz/YsGMTenNmbnf76S3Zsfy17ZP53bM2gGPbCqAT24pgObO3gWLZj27fs
wYe/YTuqz7FTX33Bsh78K5t23342Ycaf2Ngpu1h65tss7Y7XWd/Rr7KkEb9inYa9wDQtQ02a
po1MSUkZKXJiRHJy8giRE7epie+n8/LpIieG8/LDRU4MUxPfH8rLDxU5MWjw4MGDeD6EcPVP
TU0bMNCf+L7Wu0+fvrempPTj1/Xju92TevToeUtyci8up5emJXbs1Llzl67d/EmLiY2LT9A6
aA3JGRWtBSRHwJ5xPsRqgfFI9X/JDfa0i6XQvpyXqzT/POupzEk1hvUxxFo1pmVz1nBep7r+
Rm0S163K+cWkwiN/mCTPCYc48/o5pKdHddss515yGZ8Xk9hsdi+by/NYmgsijyFd4uhYPG3H
NdNGK2uIPSb7qi9LVupV+7EH9WNqK/rxA84rVJdT89er9qM8l9REP5by7VmsjMeaUh5zFvPc
zfXNZUXscb6Xo0eiEr4nols89alYejgpj1FyJ+Ux1McxynEH9Yc8Ft3GY6Da9RBlPNS1mLTn
XnSsvr5e71fRVwM4wzhpvL4Jhn5V+3Em6SbLr+EFM+n4YBpvuZb0eDwO4zpDyhbnsg3jJMeo
OdnCjoyyzeoVbZxgUacJVL+sd2DjGAVd18oyTpM+FjFEbU8mtWdOiO3JJD2zg/SxXJKrfRxK
m2U7jfXV9+4ddMzEuZaOmbhPuNugS2va6TPRu6HP+Tm1z+dY7PM51F4r7VTnsuIDHepx1U5C
2Rbyt9M9mmjsRlrfqDrIc92orVFUPpPseA6tpWZzn/c4X2GK1bqL+7c8/m8e93ePc39XwHGT
vxNxpAPlsVRfFG07aduplHMqyGuC9UVzcyObxik/xHHKJnvy3KC50Zb+zKjLjZob+Rb7PJ/a
6wmDuZGo+W19Luckx20yN+ZSLFXnRjbpIHRZH2RumK8IXPyIv1Tj3FkW8ryJDVJOnTvqcWNd
ZvOuNfPNQ2O/IsSx95CNetvBfDPqcqPm2wqLfb6C2usNg/lWQPNnEX3W8KTJfFtE6051vnlI
B6HLQ3q8KuDzKJ/PIP89itH+W2rPXurbzSH2rZdsoLId2LNRlxtlz5st9vlmam9L2hls3Cup
DVtCbEMl9VVVOxh3oy43aty3WOzzLdTeqjDwY5+TX/oZZwfnn0z82M9IpurHKkkHoctTnAf4
mkCsE4r5f26+Vcr/XcDXBlP1FUO+vlIYrK8aZvJ1+OSGdYLZGsEs5seZ+MYo6lO1vPysp6V+
s4rGsjrEsawim6tpB/PHqMuNmj/VFvu8mtpbY6PfrKE2fBRiG2qor/a1g3E36nIjxt1qO0Wf
11J794WB3/wF3W/tDGI38tw4g9+sIR1qyY5d/L8Z3DeWsrHsHt13TmH3cwmj2DS+JizljOb3
VyP1+zAXW8I96IiQr/iRftc2lvvbKXxf/NvoZ+MNPjfexIdKP5tg4pPVzz9kPdEGX26njHjD
vWK8Ul9zPl+1B3W7E30+Lp+ZJen1pPN/7y1e4CnMKV7mKip031aes8w1afa9cye5ivJcUz0L
R9/jWlhcVF6a7yrOKXXzlvfl43k/b+TMqEab1hz+XLXzG/EOhEb3JjJJ25RpSw/G/rUrt7sp
s6aK0r9f7mBJTv/n8gHPufmB3lyfifz6eqOQY1Gs4jVnw+e78vmsfNbSRfksXozZD/UjogO6
colXOKI3tutjJJ8fqKk7584Gj3KXPiLCPtLID/iaSXfTmxkv6y2Sb2lMIDkau4OdbKhT9plD
sTf5rCJW0SlTfzPEQegPU6OSGkY2Sn9iIa7RDcWsNLcuLaC0eDozq6yg1LO4wO3KLXp8cU6x
p6SosES5uCHF+ffFxQ79Yr1K84LOUAtGhVowOtSCMaEWjA21YFyoBeOvLziVTeYtd3DbW94R
L0chIbWX5LM5PdIQbJwUEDRl74J2QYviDkc/tmv092emhWsuneIjgTciii6NAU8Lcu6C5idK
CV6v6eEyKoSlh0yhXeGwfIXT8hVoFVqFVqFVaBVahVahVWgVWhUprbpj4lcVDv0DukfZXU85
9A/71DYYX6CN5A8p1X35QbL4gFJ9KbuH8hAggQW+jCxf8Db2rfrASX1gIR4KLGiiD+T1/QM0
q8g03zZPqjyzL5zJY7Lt8n54DX0hTj7ckTYjXpJW6xXHzfQYptS1lu+n26hHsLYWc/7SSWu2
HfyI1lw75DQQNjpG/yCZsQxet6xDPGyS2xpz6faQ0cnsC0A++T8SEhISElKzKS8v76j4AUX8
EAwAAEQuIg6IeKDGB7fbfXjDhg2+48eP+86fPw8AACBCEXFAxAMRF2SMEHHj2LFjvrq6Ot8n
n3wCAAAgQhFxQMQD9Q9ziPsLET9qa2sBAABEOCIeGP8I7IULF3z79u0DAAAQ4Yh4gBgBAAAA
MQIAAIAdMWL//v0AAAAiHMQIAAAAVmLExYsXfQcOHAAAABDhiHiAGAEAAAAxAgAAgB0x4tCh
QwAAACIcxAgAAABWYsSlS5d8hw8fBgAAEOGIeIAYAQAAADECAACAHTHiyJEjAAAAIhzECAAA
AIgRAAAA7IoRR48eBQAAEOEgRgAAALASIy5fvuw7deoUAACACEfEA8QIAAAAiBEAAADsiBF1
dXUAAAAiHMQIAAAAiBEAAADsihGnT58GAAAQ4SBGAAAAsBIjrly54jtz5gwAAIAIR8QDxAgA
AACIEQAAAOyIEfX19QAAACIcxAgAAABWY8TZs2cBAABEOIgRAAAAECMAAADYESOuXr3qO3fu
HAAAgAhHxAM1RpSVlflOnjypf7cO/QMAAJGLiAMiHoi4IGPEwoV5n2/atMl34sQJPX4AAACI
TEQcEPFAxAWmpHnz5u0pLy/X7y8AAABEJiIOiHjAkJCQkJCQmkkzOBM5GZxojoujEV2UcgP4
geEm+4M4fTkOOq5Rvnv3bjaQ54l0rg/VJ8v9gPafpQtk2VjGKoYo16XSto+n/jyP43SjY+LS
nrQt0v3i+bvmv+4iL6/qWU2CnQ4tdRabw/Wcw3JYISvRt9ysmHlYnoV+m3JPbvl4Z36C2M4b
k1s+Sa8hhxX4tXFmuQY6Wf3IOqG32PYULijayPNlJaXu+aLIu4n68a/F+ZcWJbAKxnJ527cu
XefUeD6Gn7/w09zyqemsXGsU68i4MkUM0ypRfn3JOqc46OOdJsqOXs92Tv/NwwmivLhO8ufV
otw2TfSUKCe29/Bj9Z+9Ef/WO4l62buqE9neWQvLJ0//Ysc13ndCJ3F8D2/H2trKJeKaBUv0
7mcyV8dX9r3TpO83auj7tup70Qg5L+Yr86Krsj1DmctCgR50LsqwPZWTRHVlz87KiuEX38e3
d3HiqVwyzeV4Zd4xql+QRb6kgvwK0zvsu4bzQ5SyGtOaHGdhRpnXWEj0o3wl57KwRfJlov13
Oay1v05cozU6sw/ZmiDtj7uuzbcb2p+eFMMOLh3HjnjvZOndYtht3WPZp2Vj2bfrp7CDy8bz
83Fs+wMuNrRrNNtbmME+X3knO7R8PPsgdyh7/90zzOP5nmX0jOfnRrBDy8aymnkD2DcHP2Uf
b3uLufMusPd+0p/tWTCIvTmzNzv99Zfs2P5a9sj879iaQTHshVEJ7MUxHdjawbFsx7Zv2YMP
f8N2VJ9jp776gmU9+Fc27b79bMKMP7GxU3ax9My3Wdodr7O+o19lSSN+xToNe4FpWoaaNE0b
mZKSMlLkxIjk5OQRIiduUxPfT+fl00VODOflh4ucGKYmvj+Ulx8qcmLQ4MGDB/F8COHqn5qa
NmCgP/F9rXefPn1vTUnpx6/rx3e7J/Xo0fOW5OReXE4vTUvs2Klz5y5du/mTFhMbF5+gddAa
kjMqWgtIjoA943yI1QLjker/khvsaRdLoX05L1dp/nnWU5mTagzrY4i1akzL5qzhvE51/Y3a
JK5blfOLSYVH/jBJnhMOceb1c0hPj+q2Wc695DI+Lyax2exeNpfnsTQXRB5DfiCOjsXTdlwz
bbSyhthjsq/6smSlXrUfe1A/praiHz/gvEJ1OTV/vWo/ynNJTfRjKd+excp4rCnlMWcxz91c
31xWxB7nezl6JCrheyK6xVOfOkg3h7IfQ8diiDhlW5aNVo5Ft/EYqHY9RBkPdS0m7bkXHauv
r9f7VfbVME4aZ4KhX9V+nKmsAUX5AZxMOj6Yxlue93g8DuM6Q8oW54yymUXZmiLbrN40izql
mehkVq9G9aWGWK8sn6bUO7Bx7IOul4t5/nKU355HKnrI/S4NtuFTAnFFptm2XNKJNdYYUS/z
OwvzuOjSbUd3JtdHdfl/u0q5ublet9vte+yxx3yLFi0yRZxvqo68vDzvE088oX+Ot3Tp0uso
Kipqttu4fK94j2D58uW+p556KoCSkpKQur2wsND75JNP+ioqKnxPP/10A6INofYHb4NXXL9q
1Srf6tWrdbxer6Vh5zp4xfXr1q3zrV+/3vfMM89YNhvebq+4Vjw7e+6551pkds8++6x348aN
vueff77FZstle1tzvUj8em97mjPq/fr5Ju7XA+/vWpISmbivE9zMe8fVWuvuHcdrrbt3VOOo
XDvEmMT1y2+8ERDXMyl2zAkxtmZSDMw2xHUnna/v3NlhvIdtWFPwc0bZzKJsTZFtVm+aRZ3S
THQyq1ej+lJDrFeWT1PqNYvrTkNcz6bynahdIp7PNsjrpvTFTCUUq3pk0f1qbDP2YFznZVOb
80Mck2yS6QliD8Z1nrOJdV425VZka4rsYOs8KzqlmegUbJ2XT2OXH6I95FP9nhbaQzbZQ66J
PWSb2IOqh7CHUS2wBw+1eUWIY+IhmV4b7MFDuRXZmiI7mD1Y0SnNRKdg9rCCxm5FiPawgur3
ttAePGQPS03swWNiD6oewh5Gt8AevNTmzSGOiZdkVtpgD3KBZEW2psgOZg9WdEoz0SmYPWym
sdscoj1spvorW2gPXrKH503swWtiD6oeWXTvZ9UeKqnNW0Ick0qSWWWDPVRSbkW2psgOZg9W
dEoz0SmYPWyhsdsSoj1sofqrWmgPlWQPr5jYQ6WJPah6CHsY2wJ7qKI2V4c4JlUks8YGe6iS
9xcWZGuK7GD2YEWnNBOdgtlDNY1ddYj2UE3117TQHqrIHt42sYcqE3tQ9cii57pW7aGG2vxR
iGNSQzL32WAPNZRbka0psoPZgxWd0kx0CtZe9bPoUOyhlurf10J7qCF7+MjEHmpM7EHVQ9jD
OLIHaQPyM/1VmvkzAIdF27HSH2tI5mf0PKa1tmNF9kET2aGMRVvof/Am6K/K1my0cVFvkkGn
UPpVvrfibOK9FafyzEW2X7638lkT7604af5kN6PPW1qjbDmHjDaaRc9yogzvWJxv4h0LfF5m
7+dl6nPJioqKJv2TGJbW2HIPGvthhvmpPEoJmJ9RQew9KogfMdZnnO9RNvo7oy6htFN9/tvS
zyut9vkwamdmkD43fl4Z1cTnlVb7yCjbjnqlTgfpHT07651A9WZaGNNQfeEwE1+o9o/qC83e
f7JrDmaSzOwbNAfre/cObl/8XEt1OcAL3G3QJRzbuYbeMztgsZ3q+w+K33D0NPEhzhC3Q7HV
5/jOJIOtPkd2I+bGnCCfrRvbabfdZtNYe9pB7DDq0pp2+kz0buhzfq41fZ5P7fWEgd0+FILd
zqW2q3abTTrkN9hthm63N9J2PTTe3nZgu0ZdwtV2V1B7vWFguwtCsN1F1B7Vdj2kwwqqJ4ON
4IzVbTeKbPhG2rGXxr6yHdixUZdwtePN1N6WtNOuca+kvqpqB+Nu1CVcx30LtbcqDPzXmhD8
189Y4zva0n9Vkg5Cl0f1d4vd+ndjXGyy/q2YPO7POih+TPq1eJItibqBPq6K7KOmHdi6UZdw
tfVqam/NTfRxNdRX+9rBuBt1Cddxr6X27gsDH7c4BB+3kz6jU31cDelQS/coYo02ho1jd7DR
163TmluvmX3/xmnyfEm2bw19BibLynt2db2ZRp8zyWvW8v10vc56pZT5e/HBkjpOwdok3s//
Syet2Xa09P38DF63rEPYityW7+dndDL7/l37fD8fCQkJCaltUl5e3lHxvSP8DhMAAEQuIg6I
eKDGB7fbfXjDhg2+48eP+86fPw8AACBCEXFAxAMRF2SMEHHj2LFjvrq6Ot8nn3wCAAAgQhFx
QMQD9e/iiPsLET9qa2sBAABEOCIeGP8G84ULF3z79u0DAAAQ4Yh4gBgBAAAAMQIAAIAdMWL/
/v0AAAAiHMQIAAAAVmLExYsXfQcOHAAAABDhiHiAGAEAAAAxAgAAgB0x4tChQwAAACIcxAgA
AABWYsSlS5d8hw8fBgAAEOGIeIAYAQAAADECAACAHTHiyJEjAAAAIhzECAAAAIgRAAAA7IoR
R48eBQAAEOEgRgAAALASIy5fvuw7deoUAACACEfEA8QIAAAAiBEAAADsiBF1dXUAAAAiHMQI
AAAAiBEAAADsihGnT58GAAAQ4SBGAAAAsBIjrly54jtz5gwAAIAIR8QDxAgAAACIEQAAAOyI
EfX19QAAACIcxAgAAABWY8TZs2cBAABEOIgRAAAAECMAAADYESOuXr3qO3fuHAAAgAhHxAM1
RpSVlflOnjypf7cO/QMAAJGLiAMiHoi4IGPEwoV5n2/atMl34sQJPX4AAACITEQcEPFAxAWm
pHnz5u0pLy/X7y8AAABEJiIOiHjAkJCQkJCQmkkzOBM5GZxojoujEV2UcgP4geEm+4M4fTlR
dFyjfPfu3WwgzxPpXB+qz0Hnf0D7z9IFsmwsYxVDlOtSadvHU3+ex3G60TFxaU/aFul+8fxd
8193kZdX9awmwU6HljqLzeF6zmE5rJCV6FtuVsw8LM9Cv025J7d8vDM/QWznjcktn6TXkMMK
/No4s1wDnax+ZJ3QW2x7ChcUbeT5spJS93xR5N1E/fjX4vxLixJYBWO5vO1bl65zajwfw89f
+Glu+dR0Vq41inVkXJkihmmVKL++ZJ1THPTxThNlR69nO6f/5uEEUV5cJ/nzalFumyZ6SpQT
23v4sfrP3oh/651Evexd1Yls76yF5ZOnf7HjGu87oZM4voe3Y21t5RJxzYIlevczmavjK/s+
2qTvN2ro+7bqe9EgOS/mK/Oiq7I9Q5nLonwPZdzU7amcJKore3ZWVgy/+D6+vYsTT+WSaS7H
K/OOUf2CLPIlFeRXmN5h3zWcH6KU1ZjW5DgLM8q8xkKiH+UrOZeFLZIvE+2/y2Gt/XXiGq3R
mX3I1gRpf9x1bb7d0P70pBh2cOk4dsR7J0vvFsNu6x7LPi0by75dP4UdXDaen49j2x9wsaFd
o9newgz2+co72aHl49kHuUPZ+++eYR7P9yyjZzw/N4IdWjaW1cwbwL45+Cn7eNtbzJ13gb33
k/5sz4JB7M2Zvdnpr79kx/bXskfmf8fWDIphL4xKYC+O6cDWDo5lO7Z9yx58+Bu2o/ocO/XV
Fyzrwb+yafftZxNm/ImNnbKLpWe+zdLueJ31Hf0qSxrxK9Zp2AtM0zLUpGnayJSUlJEiJ0Yk
JyePEDlxm5r4fjovny5yYjgvP1zkxDA18f2hvPxQkRODBg8ePIjnQwhX/9TUtAED/Ynva737
9Ol7a0pKP35dP77bPalHj563JCf34nJ6aVpix06dO3fp2s2ftJjYuPgErYPWkJxR0VpAcgTs
0Xz4/wEAAP//7H0JYBRFun/1zGRyEEgCCURAHAj3EXIfHiSRK8hhIBF1l30SyISMhElMJgRE
wqyuiopPhOfqno/dp4L/1RXfeuBK1vh0V/ftugqCsKC7iAcuh0QO34ou86/q/mq6utMz6Ukm
MMav4Jfuqq6u76uq76uvrq7x60O0pLVHYvuX6penNjIM/Fwv75IUPRso6KRow4bobK1o0yoo
1lM8BWn9E3hi791V+UiJ++DzJfwZaxDndNQh2S2WZbOZtpKrqV6UkHnkWrKQXqNBF9jVDnmJ
gbBYuI/phMdQ+hBvGPjFtixVSFcsxxQoxxHdKMfXKH4JaVklJV2xHPmz5CDl6KH3c0kTtTUe
anPq6dVJ87uU1JEV1FcpW6JG6mPWLRbKlHU9rHC1C1crXO1QxnYh3ALlwcOiergORLkeK9SH
2Bfj8nwJhLW3t8vlyspqJMV4ijSa3hRduYrlOAfyxuOvpxGLIHwM1DfvS7pcLou+n8Fps2cV
unriddQZbSZHetpG6TIep4SYpymQPk93lFpHAfu1PI7VoIyZDRH5KQJ+yk3yUwT5rAhQxrxL
LpaxGZ45n/r02gcPDlhn7FlX64yNE67S5aU7fPoM8u0vc/pMLPPyEMu8HPgNhU9Rl4U20CKG
i3Ji5p7R3wFjNMbsRujfiHngz/oDrzaIXwRyXA59qXm0zVtBe5ist+6g7Vs1/VtN27sVtL2r
pXBCe8fsSB+4RkN6Nri3wr1ViGcVwN8JVBad6UYF1FONyXqqAHlyXSDd6Mn2TJ+XC6UbNSGW
eQ3w64oA3YiXFFlfSHGUwmmgGwvBloq6UQF5YHnZEEA3jHsEDhqixFJ1Z7VpvYkOEE/UHTFc
n5aR3nVH31xQ92tN1r0LZLSlF+ibPi8XSt/Whljma4HflgjQt1rQn+Uw13Crgb4th36nqG8u
yAPLyw2yvaqlelRDNUgZo+jlv6vy3AJlu8lk2baADGzuBfKsz8uFkudNIZb5JuC3K3wGqvfN
wMNWkzxshrLa1gvqXZ+XC1XvW0Ms863A77YIaMfeg3bpIYoXKR41aMceAppiO7YZ8sDychvF
dbRPwPoJDfSfk9556N8q2jeYIfcYauSewhi51zCH9sOn+fsJRn0EI5sfY9A22qBMxfh8rqer
7eY2qMudJutyG8hcay/QH31eLpT+7AyxzHcCv61hbDdbgYfXTfLQCmW1uxfUuz4vF6LeQ+WT
lfku4Hd3BLSbj8B46+UAcsOf5evazVbIwy6QYwf9N5u2jR6SS6bKbed0soBSyCIzaZ/QQ5FN
x1eT5XGYg6ykLWi66TeulkdtubS9nU797K/azsbq2txYgzaUt7NxBm2yOP/B04nSteXhpBGr
GyvGCul11uaL8iDe94P5cb5mliynM5H+vbahyuWubFjtqHM7JzVXrnaUzLt2YYmjrtoxw7Us
e6pjWUNds6fG0VDpcVLOh9L6XECZnGNTZZoJrU9YO/bp1pF7ykkwNuGOyyZ3W1MI+X0Slbvp
c2ew2M+usZBkqzIvr1nnpgGDaX6K6fvteiKHbcT7hNU/v8vXZ/laS6IwF8/q7HI5ZADV/yRK
8SsKVho75Dri6weiG0BxhZway81lbAVTrhUmI2nQFvg6cVfJs9dRch+bh20W7h8S7j8V6me7
cL9Ftoh89WJTJ1Q3+9/cbhjzIdJRIkT3aSfPt3fyfAqUo0QKyVF/eXGZsAj6xNdiooU6K5J3
vlgA8mKxLdlPxyavyLB3ZEUwik21R9LEZqtPc5tqPa76Wqdjad2K+soGV2Odu1F42e9iFD97
2SK/LCdpHNFqNqLNbMQosxHtZiNGm40YYzZibMeIM8g0yrmF6taavrj5Cx263uJ8YXY3+bvn
VjAIkuA7I52RbLTBkcPasr88OTNSr7xRvEk70BLyoho8KcCzM5ICm2C8fuRP7XH/hhTmJgBs
8qRNk9Assy7PeRhezAh39S9Jibn99pdukLecnfeRgSppSUe6zLGysrbJGT7S95/5wVcDfvzD
KxXSkkDaIpAexDpirDfsqfNU1mqMe3fdSJ7rQSppqxHpRtcyt6vatbTS7QkrAzTXAmmbQJpt
4Znd4Mmd2uCcvqAia2alpzK7enK1w7GyMd1h8ODqFfW55dMnl0/vhGL7X5/8WxHkephKOsos
6WY6Euwi6eHvl3wMpCWBtN08accEByNGQiZN/vqXF4C0RSAdbZY0o+NQCIVKev/OD48CaatA
OqZz0n4KvOBDJf1o21OvA2mbQDo2dNK84E2T3p724v6XFdJRAum4UEkLBW+WdNt/Dt4HubYL
pPvoSNNMafMWBtKSpfQw5DpaIB1vTFog0H3S77Xc/QfIdYxAum9H0kp29XS6QXrHB/84AqRj
BdL9BNKDe6I1+9BR/d67j47gbfhglXSCWdJdbc1ONQ8oPfvuOCAtCaQTzZPuWmt2hCy++dn2
r3lrJpBOMku6q63ZpY/99I/vXJ8BubYKpPt3Trp7rdmURc/9evUb8UDaJpAeEDrp0FqzDSU5
P/f2HQakowTSyaGSDlW5nl7w+IpfpAwF0naBdIqOdNhbs73Nr//2bwWjgXS0QHqgMenwtWbD
Zz088Y9L+gDpGIH0oI6kw9uaDbvmRNSDSZOAdKxAOlUgPbwnWrPmWz6Y2+Q+eRW0ZsNV0peY
Jd3V1uy+X9/8Wsn0AiAtCaQHmyfdtdZstyf/xn/99Fnemgmkh5gl3dXW7LNTw966e/4TMPqw
CqSHdk66e63ZzUeTPq3+rwW8byaQvjR00qG1Zken/2XuZyk3TIHWTCA9LFTSoSqXUxrZ9uxt
K4G0XSB9mY502Fuz5XW2nPP/thEkPFog7TAmHb7WbPur/c5kPvY93jcTSA/vSDq8rdmivi//
dnzOKZDwWIH0CIE0U7SrG+qa3ZNm1DU0rvbUOB0zSHdJK1NBJ9dBazZEJZ0WnHRZmElLAumR
etKVDZ5ap8dD8xse0v0XNNyz1dYfzIdFID0qEOmyMJHe/8Ghy1Z/uJePNAXSo3WkFzgab2mq
bHCScJHOXjDg8Au/O8FbM4H0GIE0a9lGOcoa6pZULnHVujyr2byKu6m21lFKujP6EOZSyKUq
6bGdka6s9Tgb3JUe10on5aCrpG/kQwCB9Dgd6QWUSB0jWe/nwOVsJN0lzXNtEUiP15Ge5qqu
djY43UudDpfbUTJr6lLSPdL1P5uQ/sf7K/gQ4NIn5LU//fQoJy1OkXJn7g1LyG9YQ34DuUKu
kCvkCrlCrpAr5Aq5Qq6+LVx9UFzoVSbuY+Vp7Hl17lo6Qqh2efi+02lB9pqyddPpq+rr3E63
x1VZy3eoOum4kg513KTbw4pvyNaZy+GEiChajhLxyXtN2Zfjqbr6EZ2615TNCVwpD1T5frvR
MGYOtLXmaf9OSzH22CBvXEWyZMn4DQwKGZ6Fe+Y+Ee6PwD2rwy3y2Sl8U4L49nkDKjxFXvf6
55xKoC1HnDKve/3z7uww9W/PiRFkmLB9jSzedC6yxltSJc0LbGRdUbmk1sl0pMHZ2FTradRR
khUllTgsmhcZd1ObGlY6jfhKJTHWTmP73bdmqykZ3kZe2U/QoUPXS92nVqHVjFauNwnPgjmL
ZsrfQtiXAIq1EO0Ha2DA7hQ/UKxJoG0J82/50Y+eKNKmnArx2iFcXn/XbxHVu86eG7j2os5i
8IaRf+cg2kQSwOoToT8x0ztR6Fv6N5omEvm0xSOCdedvl3obhLKVU5NzJHXOsxyP7bJiZfrH
4HkTS0m+Xw1nnFLKP//junU+5W+jvDynWm1vkZhz7p8lv3vjVTdmjHeuqh+7fPwN4/rGkTLZ
3ATrpf63UiK/kT+Zq6hxNfofOZZWuh1LnI6ayoYqh6eOdYvTHRUNqx3VTY2NLvcyR7OLJsRW
T1xul5y2vDPWUV3X4JidTp6Vi5XlYD55lss2OnTo0H1D3AKlcSyXxwY3ZrDjZSo05yFy94zm
LNfXYOwrscZZbgJJnzf/PGeKcruBHI9V7FBFZRM5xtrwhXayzLav+ZH/2NNMm/DMybMn3DDp
hm9roWdOXv7tlrrZRoFMXqbVNS2pZZa3wrXCSfzyMmfe2Kxx316ZqXWz7C9HeUGHDh26i+vC
dOzGNzkZiw63yZ8BbSQPksV0RD6CoiDAapW/FwhOHDKH/kZp8UJvHHD0G/l6vWHv9QbD0BvV
D3O9a2b9pki+c+wp+VnRNnlGwhKkBKSA/Oqd2G/uqXQXQjlINO1nu1MOjiN1m3pBObAZpk+6
Uw7kjmvv6AXlYKVpH+lWOXhner7R5TCz+Ide5Rvgh2nrpLQebKmcfcr2dBQhX9CHb8rlo6XF
PokJNqsYNveIt7/c/LLzE4YSi386fGJnE5t90/1FsVkumJCoFr/oZdffkkSgyJdIHTXO2vog
b16QQsGh+kVzxaz+L18wfeZNQk3fpNT0t2Wo/mLxP/w/msIPLfthcaATPUqJ8rMiHU/0YJr9
G96oZoRZn9rHFkr/d8NOeQXmNxrSko708nCr8toJz5881PAZkJaI9kQPkTSbAAwr6eojz+Q/
9XY7kLYQ7YkeImmtgIaB9K/OLbx7w7VHgLRVIM06z5x0rFLX4SV96NS9tY/t+yWv69jApGld
h5d0dfzv7vyfQ9t4XcdqzzHhpKWeyPXXP739+V95N/JcS9pzTETSYc91++0bfrGu8SjPtaQ9
x0QkzSQ8rKRnxHz5w/zfnuASLmnPMRFJh13C2+sfG0l+8hGXcEl7jgknbemJui7bW3PvB6X/
y+vaoj3HRCQd9rqOOnpy2PDCz3ldW7TnmIikw17X6bnlv5jy3dO8ri3ac0xE0mGv6/1/eqll
xV4u4VaLcZPCrOA057IGp7NR3jFKb6rqVoSlJ5hcDHUdH5i0/yPGcJFed7p++E8+PMnrOgjp
kiWNdbVNHqejvGkFy3q5zEhj10nfcFfzsf/3vVzItSUI6fLV6atIOEnfce/bW//9HgKkrfHa
M2sY6WfVXkp4SSfddc3P/z5Z2XvzrKaX0ldHmup1eElf96t7ozef+COQFnsp/XSk5V5KOEn/
+uqGnxa+PKBYIS32UhJ0pLV6HQbS6xKuejJ6cR8gbdRLedawlxIO0n//38Qn/ns7r+vYwKS1
bXgYSN9yfMx/jnj/TV7XsdqTejhpqSdynfWrS1PyF/7uZci1pD2pRyQd9lzfe83itpgVfwXS
Yi+lv4601nKFgfTE/OQvHm8/DQUu9lIG6EiHXcLPTt7TvuHRY0Ba7KUkC6QtPVHXv0h99sY+
r/6JS7hFe1KPSDrsdX3y1rMfzn3qH1zCLdqTekTSYa9r8aiFZzW9lEE60mGvay1po17Ks4F7
Kd0jLfZSnjXspTwbuJfSPdLblv6yPPPYH3hdByEd9l7Kx19/f3N68/Ncr4OQDnsv5Wfpq0el
nW3jeh2vPZWJkf6kp3opMVuvizs39TGZ9CeaXsolOtJh76VkfmfIsrdPHALSYi9lsI502Hsp
2z/0PbtqynkgLfZShuhIh12vf+7+45AnvzgDpI16KZ/0VC8lf8VN/W946qe8rmMDkw57G/5K
W8tnUu1veV3Has+i4qR7pJdy23Oj/+3RrP98GXItac+iEkmHPderF/z6VMKht3muJe1ZVCLp
sFuuv6ed+6/MkVzMxF7KZTrSYZfwJS80PU6OH+MSLmnPouKke6SXsqzi78P/K7GVS7hFexaV
SDrsdT36vr/veWT5P3hdW7RnUYmkw17XaWs3Dx12fb9iqGuL9iwqkXTY6/ru8u95XomOAtJG
vZRPLkQv5RPDXsonPdVLOXRgV+mYh07wug5COuy9lPKZZz2fl7zO9ToI6bD3UnZs/fK2/6h+
g+t1vPbcMUb6SE/1Uv7H/v3iD1YqvZQjml7KKB3psPdSrJc+/vHHd78KpMVeymgd6bD3UrY1
ZJ6Jyh9crJAWeyljdKTDrtej4t7q/9sJ/YG0US/lSE/1UiTvlPfsX23hdR0bmHTY2/Cvt9/2
oPTz/+F1Has9bY2T7pFeyshrr2gqz3z8Zci1pD1tTSQd9lzfv3zVae91fwbSYi9lvI502C3X
gk/qTxYtPQ8FLvZSJuhIh13CF6d+t2h84lkgLfZSJgqke6SXMv76B9b+fmYbl3DBaE7SkQ57
XTvHPTO5/K+HuIQLpNN1pHt0LuWIppcyWUe6R+dSjhj2Uo5ciF7KEcNeypGe6qUkb782/dXq
/+V1HYR02HsppN8/7n/33x7keh2EdNh7Kcmvzx/s3f0U1+t4461zftLCvh7uzL1hCfkNa8hv
IFfIFXKFXCFXyBVyhVwhV8jVt4WrQjjAcSD5SE7pA+9iEvPfFuJ9xqLhhf80tjjWIxfAhfrT
4Izvnv5pcNHPf76dryDzXf0pcM/KOg7e4W4YxNeX7SXE/zPv8oQr/BS8l50rVBWkDPj7wzU5
8xYZ3weYiRTo8XIQ88PDOO/+oyQlZRJpDIT7D3hqb9eky8KN8jFeSGu7pMwKhSsfgXhlR1Nt
GSd1ygcNkTrjg6sBk9Ecli7z0LR5GmxGk99LxKHo3jjJaPaE/0eHDh06dOi+0a66uvr9pqYm
X319PQKBQCAQEQdmo5itEm2X0+k88MADD/g++ugj3+nTpxEIBAKBiDgwG8VsFbNZ3H4xm3b4
8GHf8ePHfW+99RYCgUAgEBEHZqOYrWI2i9svNi5jtm3Xrl0IBAKBQEQsmK1iNku0X2fOnPHt
3r0bgUAgEIiIBbNVaL8QCAQCgfYLgUAgEIiLZ7/27NmDQCAQCETEAu0XAoFAIHqL/Tp79qzv
3XffRSAQCAQiYsFsFdovBAKBQKD9QiAQCATi4tmv/fv3IxAIBAIRsUD7hUAgEIjeYr+++OIL
34EDBxAIBAKBiFgwW4X2C4FAIBBovxAIBAKBuHj26+DBgwgEAoFARCzQfiEQCAQC7RcCgUAg
EBfXfr3//vsIBAKBQEQs0H4hEAgEorfYr3PnzvmOHTuGQCAQCETEgtkqtF8IBAKBQPuFQCAQ
CMTFs1/Hjx9HIBAIBCJigfYLgUAgEGi/EAgEAoG4uPbrxIkTCAQCgUBELNB+IRAIBKK32K+v
vvrKd/LkSQQCgUAgIhbMVqH9QiAQCATaLwQCgUAgLp79am9vRyAQCAQiYoH2C4FAIBC9yX59
/vnnCAQCgUBELNB+IRAIBALtFwKBQCAQF89+ff31175Tp04hEAgEAhGxYLZKtF9NTU2+o0eP
yt81Y/kgEAgEIhLBbBSzVcxmcfu1bFn1ew8++KDv008/lW0bAoFAIBCRBmajmK1iNosIbtGi
RW80NzfL4zIEAoFAICINzEYxW0XQoUOHDh26b7CbTVFMkUERReGgkACJQryRNGCCgX80xVAK
C4RLcH311VfJKHqNh2dDID0eLw/8T8ILPG40Id6xwnsj4N5H3XB6jaHoD2Hs1YFwz9wCthdF
Ut47S+OL+dwJhK0WacRcUk7zWU4qiZs0yndO0kBcpDqEcps+Nat5x46rWJGR6pys5hI5hUpS
Kz8ttW53lFpvm7/QykqU3TO+24aXWh8dvdD6cRL15MbL4etohktJcRzLiy9ayZ/EPF4FLL5S
K7KzbHl8rFW+o89yxiyU79l7Z36Q1XzmbExsYllplATlxLEhl6cRL8dj9+tpWM1PPrZvoHyw
OKn58eTNuXnNL7VsWHSelh3LEwt/NC+e3LOr1cPeqVopR/VfxfrlZW81KPuNEpZ9T5U9Y4Lr
xRJBL5KE+9mCLrNCS4FnNt39DIpkSKtiXlmZnb48n5UdRSzESwVdjhX0jkD6DGXQlnihXWHu
LvKZ//lYIa7kby2MHROjovPEFC6D6zqKc0wWoS1j/F9pCY3/4+wdSW3M/kDWB+A/pgPPmTr+
Jybbyb5V+eRgyxVkYn87mTQgmrzTlEuObJhO9q0uoM9jyI7rHGRcUhR5051B3lt3Bdm/poC8
tnQceeWlk8Tl+pJkDIylz9LJ/tW5pHXRSPLJvnfIX57bTpzVZ8jvvjOcvFE1mjw9ZzA58eEh
cnjPLnLTks/I+tF28nBWHPlxTh9yz5ho8uJzR8j13/uEvLjzFDn2wd9J2fV/IzPn7yFTZv+J
5E5vIxOLXiBphU+RodmPkeT0n5F+4x+mupAhOkmSJg8bNmwyuwLSU1NT09kVMEl01D+Rxp/I
roAJNP4EdgWMFx31j6Pxx7ErYPSYMWNG0+tYgGP4iBFpI0cpjvqlwUOGDL102LDL6HuXUe+A
5JSUgYNSUy+hdC6RpPi+/RISEpP6K06yR8fExkl9JL+z2qIkjbNofHp9iJa09khs/1L98tRG
hoGf6+VTkqJnAwWdFG3YEJ2tFW1aBcV6ilcgrXhJ4Ym9d1flIyXug8+X8GdxFHM66pDsFsuy
2UxbydVUL0rIPHItWUiv0aAL7GqHdiAGwmKFdiwYj6H0Id4w8IttWaqQrliOKVCOI7pRjq9R
PA9pDZKUdMVy5M+Sg5QjbYzJXNJEbY2H2px6enXS/C4ldWQF9VXKlqiR+ph1i4UytUDeLILf
DmF2QIxwz+NGCWFRPVwHolyPFepD7Itxeb4Ewtrb2+Vy5WU1niKNYoquXMVynCP0AVn8kRRF
ED4G6ps/d7lcFn0/g9Nmz/S0SYi0JYG2UbppIeYpzSBPRulKkN4Ik+ny+GlCuqPUug/YX26g
1y02RZ4nC/ng/kS/bPgEQ+wtMrrnXTrWx8ph6RKlsTC2iw5ZduTGpKNV5/97lVu6dGmL0+n0
3Xzzzb7ly5cbgj0PlkZ1dXXLLbfcIs8xrlq1qgPq6uo6LTZKv4XtDVmzZo3vtttu06CxsdFU
sbvd7pZbb73V5/V6fd///vf9YDyYLQ/KQwt7/6677vLdfffdMlpaWkKqdpqHFvb+fffd59uw
YYPvjjvuCFlsKN8t7F225njvvfd2SezuvPPOlo0bN/ruv//+Lostpd3SnfeZo++39CadEcfr
p4OM17Xju664eHlcx3BRx47e7o0dC6TujR1FO8r7DnYDu37u17/W2PUisB3lJm1rEdjACp1d
t8Lz9oQEi34M6+9T0Gd62iRE2pJA2yjdtBDzlGaQJ6N0JUhvhMl0efw0IV0ju27V2fUKiN8P
+GL2fJ6OXn+hLOYIpljMRxmMV6M7kQd9P68CeK4xWScVQNMVQB70/TxrkH5eBVxDoS0JtAP1
80LJU5pBngL182qg7mpMykMNpO/qojxUgDwsNZCHCgN5EPPB5CGrC/LgAp7XmqwTF9BsCYM8
uOAaCm1JoB1IHkLJU5pBngLJw1qou7Um5WEtpN/SRXlwgTysMpAHl4E8iPlg8pDdBXloAZ43
mayTFqC5OQzywDtIodCWBNqB5CGUPKUZ5CmQPGyCuttkUh42QfqbuygPLSAP9xvIQ4uBPIj5
KIOxX6jysBl43mqyTjYDzW1hkIfNcA2FtiTQDiQPoeQpzSBPgeRhK9TdVpPysBXS39ZFedgM
8vBLA3nYbCAPYj6YPOR2QR62Ac87TdbJNqDZGgZ52MbHFyHQlgTageQhlDylGeQpkDzshLrb
aVIedkL6rV2Uh20gDy8YyMM2A3kQ81EG67qhykMr8Py6yTppBZq7wyAPrXANhbYk0A4kD6Hk
Kc0gT4H4FeeizcjDLkh/dxfloRXk4XUDeWg1kAcxH0we8kEeuAzwOf2nJOM1AEuIshNKeTzN
Zzktyjx/d2UnFNrnDWibqYueyP956cLnX6QthVHGn4b1MDFPZsqV71uxBtm3YhXWXDj/fN8K
bxCM9q1YQX8qOsnPPkmlzXVIL6NlsJZj0+2xOB1kjwXOl4V3vkxcl/R6vUHbJ1Yt3ZHlFKj7
8Tr9FJZSNPppCyDvtgDtiD49vb7bwtje6fNihk9x/ber85Whlvl44LMoQJnr5yttQeYrQy0j
Pe1wpMvzdB726IUz3SmQblEIdWq2LRxv0BaK5SO2hUb7n8Klg0VAs+IC6WD74MGB5Ys+62pe
/kUjXKXLSyTy+TTsM2P8hsKnuP9BaDcsAw3aEKvJezOy+gz1lOhk9RmQG6Yb5QHm1vV8hltu
K6CuXb3Adujz0h0+fQb59pc5fdadMq8Bfl3fELldaCC3FZCHmgBj+J6WWxfUdUsvkFt9XiJV
btcCvy0RILdVJuR2OfAjyq0L8rAW0skg6RS5suzaQIYvpBy3QN1v7gVyrM9LpMrxJuC3K3yG
q943Q1lt6wX1rs9LpNb7VuB3WwS0X+tNtF8PEXV/Nm+/NkMeWF4Wy/uKnfJ3MQ4yTf4ippq2
Z32Edoy3a7FAm8N2Adu4bSAfrb1A1vV5iVRZ3wn8tl7ENq4Vymp3L6h3fV4itd53Ab+7I6CN
qzfRxr0M83NiG9cKeWB5uQH6aPkkhxSQwg79tM76a0bf3lgN1pY4f0/D/BePy8c9Yn8zDeaY
+DvbqX+inGa7EMt4T3wgJ9ZTIJ7kvfnjpE756PLefJo2T4PJCr/3780fZ/TtXe/cm48OHTp0
6L59rrq6+n32PRSeXYVAIBCISASzUcxWibbL6XQeeOCBB3wfffSR7/Tp0wgEAoFARByYjWK2
itksbr+YTTt8+LDv+PHjvrfeeguBQCAQiIgDs1HMVom/q8XGZcy27dq1C4FAIBCIiAWzVeLv
GrP7M2fO+Hbv3o1AIBAIRMSC2Sq0XwgEAoFA+4VAIBAIxMWzX3v27EEgEAgEImKB9guBQCAQ
vcV+nT171vfuu+8iEAgEAhGxYLYK7RcCgUAg0H4hEAgEAnHx7Nf+/fsRCAQCgYhYoP1CIBAI
RG+xX1988YXvwIEDCAQCgUBELJitQvuFQCAQCLRfCAQCgUBcPPt18OBBBAKBQCAiFmi/EAgE
AoH2C4FAIBCIi2u/3n//fQQCgUAgIhZovxAIBALRW+zXuXPnfMeOHUMgEAgEImLBbBXaLwQC
gUCg/UIgEAgE4uLZr+PHjyMQCAQCEbFA+4VAIBAItF8IBAKBQFxc+3XixAkEAoFAICIWaL8Q
CAQC0Vvs11dffeU7efIkAoFAIBARC2ar0H4hEAgEAu0XAoFAIBAXz361t7cjEAgEAhGxQPuF
QCAQiN5kvz7//HMEAoFAICIWaL8QCAQCgfYLgUAgEIiLZ7++/vpr36lTpxAIBAKBiFgwWyXa
r6amJt/Ro0fl75qxfBAIBAIRiWA2itkqZrO4/Vq2rPq9Bx980Pfpp5/Ktg2BQCAQiEgDs1HM
VjGbRQS3aNGiN5qbm+VxGQKBQCAQkQZmo5itIujQoUOHDt032M2mKKbIoIiicFBIgEQh3kga
MMHAP5piKIUNwiW4vvrqq2QUvcbDsyGQngWe54H/SXiBx40mxDtWeG8E3PuoG06vMRT9IYy9
OhDumVvA9qJIyntnaXwxnzuBsNUijZhLymk+y0klcZNG+c5JGoiLVIdQbtOnZjXv2HEVKzJS
nZPVXCKnUElq5ael1u2OUutt8xdaWYmye8Z32/BS66OjF1o/TqKe3Hg5fB3NcCkpjmN58UUr
+ZOYx6uAxVdqRXaWLY+Ptcp39FnOmIXyPXvvzA+yms+cjYlNLCuNkqCcODbk8jTi5Xjsfj0N
q/nJx/YNlA8WJzU/nrw5N6/5pZYNi87TsmN5YuGP5sWTe3a1etg7VSvlqP6rWL+87KMMyn6j
hGXfU2XPCoHrxRJBL5KE+9mCLrP4KUK9ifczKJIhrYp5ZWV2+vJ8VnYUsRAvFXQ5VtA7Aukz
lEFb4oV2hbm7yGf+52OFuJK/tTB2TIyKzhNTuAyu6yjOMVmEtozxf6UlNP6Ps3cktTH7A1kf
gP+YDjxn6vifmGwn+1blk4MtV5CJ/e1k0oBo8k5TLjmyYTrZt7qAPo8hO65zkHFJUeRNdwZ5
b90VZP+aAvLa0nHklZdOEpfrS5IxMJY+Syf7V+eS1kUjySf73iF/eW47cVafIb/7znDyRtVo
8vScweTEh4fI4T27yE1LPiPrR9vJw1lx5Mc5fcg9Y6LJi88dIdd/7xPy4s5T5NgHfydl1/+N
zJy/h0yZ/SeSO72NTCx6gaQVPkWGZj9GktN/RvqNf5jqQoboJEmaPGzYsMnsCkhPTU1NZ1fA
JNFR/0QafyK7AibQ+BPYFTBedNQ/jsYfx66A0WPGjBlNr2MBjuEjRqSNHKU46pcGDxky9NJh
wy6j711GvQOSU1IGDkpNvYTSuUSS4vv2S0hITOqvOMkeHRMbJ/WR/M5qi5I0zqLx6fUhWtLa
I7H9S/XLUxsZBn6ul09Jip4NFHRStGFDdLZWtGkVFOspXoG04iWFJ/beXZWPlLgPPl/Cn8VR
zOmoQ7JbLMtmM20lV1O9KCHzyLVkIb1Ggy6wqx3yEgNhsUI7FozHUPoQbxj4xbYsVUhXLMcU
KMcR3SjH1yieh7QGSUq6YjnyZ8lBypE2xmQuaaK2xkNtTj29Oml+l5I6soL6KmVL1Eh9zLrF
QpmyrocVrnbhaoWrHcrYLoRboDx4WFQP14Eo12OF+hD7YlyeL4Gw9vZ2uVxZWY2kGE+RRtOb
oitXsRznQN54/KdpxCIIHwP1zfuSLpfLou9ncNrsWYWunngddUabyZGetlG6jMcpIeZpCqTP
0x2l1lHAfi2PYzUoY2ZDRH6KgJ9yk/wUQT4rApQx75KLZWyGZ86nPr32wYMD1hl71tU6Y+OE
q3R56Q6fPoN8+8ucPhPLvDzEMi8HfkPhU9RloQ20iOGinJi5Z/R3wBiNMbsR+jdiHviz/sCr
DeIXgRyXQ19qHm3zVtAeJuutO2j7Vk3/VtP2bgVt72opnNDeMTvSB67RkJ4N7q1wbxXiWQXw
dwKVRWe6UQH1VGOynipAnlwXSDd6sj3T5+VC6UZNiGVeA/y6IkA3WF+KyfpCiqMUTgPdWAi2
VNSNCsgDy8uGALph3CNw0BAllqo7q03rTXSAeKLuiOH6tIz0rjv65oK6X2uy7l0goy29QN/0
eblQ+rY2xDJfC/y2RIC+1YL+LIe5hlsN9G059DtFfXNBHlhebpDtVS3VoxqqQcoYRS//XZXn
FijbTSbLtgVkYHMvkGd9Xi6UPG8Kscw3Ab9d4TNQvW8GHraa5GEzlNW2XlDv+rxcqHrfGmKZ
bwV+t0VAO/YetEsPUbzI5mkN2rGHgKbYjm2GPLC83EZxHe0TsH5CA/3npHce+reK9g1myD2G
GrmnMEbuNcyh/fBp/n6CUR/ByObHGLSNNihTMT6f6+lqu7kN6nKnybrcBjLX2gv0R5+XC6U/
O0Ms853Ab2sY281W4OF1kzy0Qlnt7gX1rs/Lhaj3UPlkZb4L+N0dAe3mGzDeejmA3PBnRbp2
sxXywPLyZ3k85iCzadvoIblkqtx2TicLKIUsGj6T9go9FNl0hDVZHok10pa1QR5tLYHZ2pU0
LD3ENGrI1fJ4Lldod2N1bXCsQZsqtrtxBu20OCdi1Jb3EeLx8Chd+9+TfMTqxpuBZEOUH/G+
H8yn8zW2ZDnNifTvtQ1VLndlw2pHnds5qblytaNk3rULSxx11Y4ZrmXZ0xzLGuqaPTWOhkqP
k3I8lNb/AsrcHJuqA5JFuYp6cSH2TEgwluGOyzJ3W1MI+X0SldPpc2ew2N5nLCTZqszja9bF
acBgmp9i+n67nshhG/E+YfXPB/P1XL42kyjM3bP6uVwOYQUwkFL8ioKVxg65jvh6g+gGUFzh
b4GulGuEycUkinShjQnkroKdHFtkjviujilAR6L8HPWnycvMIsgXX9uIFvJUJO8ksQDkxVdb
sr9mbfIKB3tHFhSj2FS6JE1stpozt6nW46qvdTqW1q2or2xwNda5G4WX/S5G8bOXLfLLcpLG
Ea1mI9rMRowyG9FuNmK02YgxZiPGdow4g0yjnFuo7K3pi5up0KHrLc4XZneT39hYwSBIgu+M
dEay0QZHDmvL/vLkzEi98kbxJu3ARciLavCkAM/OSApsgvF6QjaXNhNdD+7MvWEJ+Q1ryG8g
V8gVcoVcIVfIFXKFXCFXyNW3havC4g+8FnlidDGJ+W+LPNkn8qDfcPttnqQU/XwimU1Qipu4
U4RFgzii3bzMN4Try1ZcoBIXONgiQlWQMuDvD9fkzFtkfG/sRHpGH6jxMM47Hw8/DR/Q8cUg
LjNsU7WYLgs3ysd4Ia3t1D8xjPkIxGsDm/AdJ3XKBw2ROuODqwGT0Rx5Ipk6mjZPgy1O8XuJ
OBSdG2f0wZCP/0eHDh06dOi+0a66uvp9dsAnHriDQCAQiEgEs1HMVom2y+l0HnjggQd8H330
ke/06dMIBAKBQEQcmI1itorZLG6/mE07fPiw7/jx47633noLgUAgEIiIA7NRzFaJPwbExmXM
tu3atQuBQCAQiIgFs1X6HxM/c+aMb/fu3QgEAoFARCyYrUL7hUAgEAi0XwgEAoFAXDz7tWfP
HgQCgUAgIhZovxAIBALRW+zX2bNnfe+++y4CgUAgEBELZqvQfiEQCAQC7RcCgUAgEBfPfu3f
vx+BQCAQiIgF2i8EAoFA9Bb79cUXX/gOHDiAQCAQCETEgtkqtF8IBAKBQPuFQCAQCMTFs18H
Dx5EIBAIBCJigfYLgUAgEGi/EAgEAoG4uPbr/fffRyAQCAQiYoH2C4FAIBC9xX6dO3fOd+zY
MQQCgUAgIhbMVqH9QiAQCATaLwQCgUAgLp79On78OAKBQCAQEQu0XwgEAoFA+4VAIBAIxMW1
XydOnEAgEAgEImKB9guBQCAQvcV+ffXVV76TJ08iEAgEAhGxYLYK7RcCgUAg0H4hEAgEAnHx
7Fd7ezsCgUAgEBELtF8IBAKB6E326/PPP0cgEAgEImKB9guBQCAQaL8QCAQCgbh49uvrr7/2
nTp1CoFAIBCIiAWzVaL9ampq8h09elT+rhnLB4FAIBCRCGajmK1iNovbr2XLqt978MEHfZ9+
+qls2xAIBAKBiDQwG8VsFbNZRHCLFi16o7m5WR6XIRAIBAIRaWA2itkqgg4dOnTo0H2D3WyK
YooMiigKB4UESBTijaQBEwz8oymGUlggXILrq6++SkbRazw8GwLp8Xh54H8SXuBxownxjhXe
GwH3PuqG02sMRX8IY68OhHvmFrC9KJLy3lkaX8znTiBstUgj5pJyms9yUkncpFG+c5IG4iLV
IZTb9KlZzTt2XMWKjFTnZDWXyClUklr5aal1u6PUetv8hVZWouye8d02vNT66OiF1o+TqCc3
Xg5fRzNcSorjWF580Ur+JObxKmDxlVqRnWXL42Ot8h19ljNmoXzP3jvzg6zmM2djYhPLSqMk
KCeODbk8jXg5HrtfT8NqfvKxfQPlg8VJzY8nb87Na36pZcOi87TsWJ5Y+KN58eSeXa0e9k7V
Sjmq/yrWLy97q0HZb5Sw7Huq7BkTXC+WCHqRJNzPFnSZFVoKPLPp7mdQJENaFfPKyuz05fms
7ChiIV4q6HKsoHcE0mcog7bEC+0Kc3eRz/zPxwpxJX9rYeyYGBWdJ6ZwGVzXUZxjsghtGeP/
Skto/B9n70hqY/YHsj4A/zEdeM7U8T8x2U72rconB1uuIBP728mkAdHknaZccmTDdLJvdQF9
HkN2XOcg45KiyJvuDPLeuivI/jUF5LWl48grL50kLteXJGNgLH2WTvavziWti0aST/a9Q/7y
3HbirD5Dfved4eSNqtHk6TmDyYkPD5HDe3aRm5Z8RtaPtpOHs+LIj3P6kHvGRJMXnztCrv/e
J+TFnafIsQ/+Tsqu/xuZOX8PmTL7TyR3ehuZWPQCSSt8igzNfowkp/+M9Bv/MNWFDNFJkjR5
2LBhk9kVkJ6amprOroBJoqP+iTT+RHYFTKDxJ7ArYLzoqH8cjT+OXQGjx4wZM5pexwIcw0eM
SBs5SnHULw0eMmTopcOGXUbfu4x6BySnpAwclJp6CaVziSTF9+2XkJCY1F9xkj06JjZO6iP5
ndUWJWmcRePT60O0pLVHYvuX6penNjIM/Fwvn5IUPRso6KRow4bobK1o0yoo1lO8AmnFSwpP
7L27Kh8pcR98voQ/i6OY01GHZLdYls1m2kqupnpRQuaRa8lCeo0GXWBXO7QDMRAWK7RjwXgM
pQ/xhoFfbMtShXTFckyBchzRjXJ8jeJ5SGuQpKQrliN/lhykHGljTOaSJmprPNTm1NOrk+Z3
KakjK6ivUrZEjdTHrFsslKkF8mYR/HYIswNihHseN0oIi+rhOhDleqxQH2JfjMvzJRDW3t4u
lysvq/EUaRRTdOUqluMcoQ/I4o+kKILwMVDf/LnL5bLo+xmcNnump01CpC0JtI3STQsxT2kG
eTJKV4L0RphMl8dPE9IdpdZ9wP5yA71usSnyPFnIB/cn+mXDJxhib5HRPe/SsT5WDkuXKI2F
sV10yLIjNyYdrTr/36vc0qVLW5xOp+/mm2/2LV++3BDsebA0qqurW2655RZ5jnHVqlUdUFdX
12mxUfotbG/ImjVrfLfddpsGjY2Npord7Xa33HrrrT6v1+v7/ve/7wfjwWx5UB5a2Pt33XWX
7+6775bR0tISUrXTPLSw9++77z7fhg0bfHfccUfIYkP5bmHvsjXHe++9t0tid+edd7Zs3LjR
d//993dZbCntlu68zxx9v6U36Yw4Xj8dZLyuHd91xcXL4zqGizp29HZv7FggdW/sKNpR3new
G9j1c7/+tcauF4HtKDdpW4vABlbo7LoVnrcnJFj0Y1h/n4I+09MmIdKWBNpG6aaFmKc0gzwZ
pStBeiNMpsvjpwnpGtl1q86uV0D8fsAXs+fzdPT6C2UxRzDFYj7KYLwa3Yk86Pt5FcBzjck6
qQCargDyoO/nWYP08yrgGgptSaAdqJ8XSp7SDPIUqJ9XA3VXY1IeaiB9VxfloQLkYamBPFQY
yIOYDyYPWV2QBxfwvNZknbiAZksY5MEF11BoSwLtQPIQSp7SDPIUSB7WQt2tNSkPayH9li7K
gwvkYZWBPLgM5EHMB5OH7C7IQwvwvMlknbQAzc1hkAfeQQqFtiTQDiQPoeQpzSBPgeRhE9Td
JpPysAnS39xFeWgBebjfQB5aDORBzEcZjP1ClYfNwPNWk3WyGWhuC4M8bIZrKLQlgXYgeQgl
T2kGeQokD1uh7raalIetkP62LsrDZpCHXxrIw2YDeRDzweQhtwvysA143mmyTrYBzdYwyMM2
Pr4IgbYk0A4kD6HkKc0gT4HkYSfU3U6T8rAT0m/tojxsA3l4wUAethnIg5iPMljXDVUeWoHn
103WSSvQ3B0GeWiFayi0JYF2IHkIJU9pBnkKxK84F21GHnZB+ru7KA+tIA+vG8hDq4E8iPlg
8pAP8sBlgM/pPyUZrwFYQpSdUMrjaT7LaVHm+bsrO6HQPm9A20xd9ET+z0sXPv8ibSmMMv40
rIeJeTJTrnzfijXIvhWrsObC+ef7VniDYLRvxQr6U9FJfvZJKm2uQ3oZLYO1HJtuj8XpIHss
cL4svPNl4rqk1+sN2j6xaumOLKdA3Y/X6aewlKLRT1sAebcFaEf06en13RbG9k6fFzN8iuu/
XZ2vDLXMxwOfRQHKXD9faQsyXxlqGelphyNdnqfzsEcvnOlOgXSLQqhTs23heIO2UCwfsS00
2v8ULh0sApoVF0gH2wcPDixf9FlX8/IvGuEqXV4ikc+nYZ8Z4zcUPsX9D0K7YRlo0IZYTd6b
kdVnqKdEJ6vPgNww3SgPMLeu5zPcclsBde3qBbZDn5fu8OkzyLe/zOmz7pR5DfDr+obI7UID
ua2APNQEGMP3tNy6oK5beoHc6vMSqXK7FvhtiQC5rTIht8uBH1FuXZCHtZBOBkmnyJVl1wYy
fCHluAXqfnMvkGN9XiJVjjcBv13hM1z1vhnKalsvqHd9XiK13rcCv9sioP1ab6L9eoio+7N5
+7UZ8sDysljeV+yUv4txkGnyFzHVtD3rI7RjvF2LBdoctgvYxm0D+WjtBbKuz0ukyvpO4Lf1
IrZxrVBWu3tBvevzEqn1vgv43R0BbVy9iTbuZZifE9u4VsgDy8sN0EfLJzmkgBR26Kd11l8z
+vbGarC2xPl7Gua/eFw+7hH7m2kwx8Tf2U79E+U024VYxnviAzmxngLxJO/NHyd1ykeX9+bT
tHkaTFb4vX9v/jijb+965958dOjQoUP37XPV1dXvs++h8OwqBAKBQEQimI1itkq0XU6n88AD
Dzzg++ijj3ynT59GIBAIBCLiwGwUs1XMZnH7xWza4cOHfcePH/e99dZbCAQCgUBEHJiNYrZK
/F0tNi5jtm3Xrl0IBAKBQEQsmK0Sf9eY3Z85c8a3e/duBAKBQCAiFsxWof1CIBAIBNovBAKB
QCAunv3as2cPAoFAIBARC7RfCAQCgegt9uvs2bO+d999F4FAIBCIiAWzVWi/EAgEAoH2C4FA
IBCIi2e/9u/fj0AgEAhExALtFwKBQCB6i/364osvfAcOHEAgEAgEImLBbBXaLwQCgUCg/UIg
EAgE4uLZr4MHDyIQCAQCEbFA+4VAIBAItF8IBAKBQFxc+/X+++8jEAgEAhGxQPuFQCAQiN5i
v86dO+c7duwYAoFAIBARC2ar0H4hEAgEAu0XAoFAIBAXz34dP34cgUAgEIiIBdovBAKBQKD9
QiAQCATi4tqvEydOIBAIBAIRsUD7hUAgEIjeYr+++uor38mTJxEIBAKBiFgwW4X2C4FAIBBo
vxAIBAKBuHj2q729HYFAIBCIiAXaLwQCgUD0Jvv1+eefIxAIBAIRsUD7hUAgEAi0XwgEAoFA
XDz79fXXX/tOnTqFQCAQCETEgtkq0X41NTX5jh49Kn/XjOWDQCAQiEgEs1HMVjGbxe3XsmXV
7z344IO+Tz/9VLZtCAQCgUBEGpiNYraK2SwiuEWLFr3R3Nwsj8sQCAQCgYg0MBvFbBVBhw4d
OnTovsFuNkUxRQZFFIWDQgIkCvFG0oAJBv7RFEMpbBAuwfXVV18lo+g1Hp4NgfQs8DwP/E/C
CzxuNCHescJ7I+DeR91weo2h6A9h7NWBcM/cArYXRVLeO0vji/ncCYStFmnEXFJO81lOKomb
NMp3TtJAXKQ6hHKbPjWreceOq1iRkeqcrOYSOYVKUis/LbVud5Rab5u/0MpKlN0zvtuGl1of
Hb3Q+nES9eTGy+HraIZLSXEcy4svWsmfxDxeBSy+Uiuys2x5fKxVvqPPcsYslO/Ze2d+kNV8
5mxMbGJZaZQE5cSxIZenES/HY/fraVjNTz62b6B8sDip+fHkzbl5zS+1bFh0npYdyxMLfzQv
ntyzq9XD3qlaKUf1X8X65WUfZVD2GyUs+54qe1YIXC+WCHqRJNzPFnSZxU8R6k28n0GRDGlV
zCsrs9OX57Oyo4iFeKmgy7GC3hFIn6EM2hIvtCvM3UU+8z8fK8SV/K2FsWNiVHSemMJlcF1H
cY7JIrRljP8rLaHxf5y9I6mN2R/I+gD8x3TgOVPH/8RkO9m3Kp8cbLmCTOxvJ5MGRJN3mnLJ
kQ3Tyb7VBfR5DNlxnYOMS4oib7ozyHvrriD71xSQ15aOI6+8dJK4XF+SjIGx9Fk62b86l7Qu
Gkk+2fcO+ctz24mz+gz53XeGkzeqRpOn5wwmJz48RA7v2UVuWvIZWT/aTh7OiiM/zulD7hkT
TV587gi5/nufkBd3niLHPvg7Kbv+b2Tm/D1kyuw/kdzpbWRi0QskrfApMjT7MZKc/jPSb/zD
VBcyRCdJ0uRhw4ZNZldAempqajq7AiaJjvon0vgT2RUwgcafwK6A8aKj/nE0/jh2BYweM2bM
aHodC3AMHzEibeQoxVG/NHjIkKGXDht2GX3vMuodkJySMnBQauollM4lkhTft19CQmJSf8VJ
9uiY2Dipj+R3VluUpHEWjU+vD9GS1h6J7V+qX57ayDDwc718SlL0bKCgk6ING6KztaJNq6BY
T/EKpBUvKTyx9+6qfKTEffD5Ev4sjmJORx2S3WJZNptpK7ma6kUJmUeuJQvpNRp0gV3tkJcY
CIsV2rFgPIbSh3jDwC+2ZalCumI5pkA5juhGOb5G8TykNUhS0hXLkT9LDlKOtDEmc0kTtTUe
anPq6dVJ87uU1JEV1FcpW6JG6mPWLRbKlHU9rHC1C1crXO1QxnYh3ALlwcOiergORLkeK9SH
2Bfj8nwJhLW3t8vlyspqJMV4ijSa3hRduYrlOAfyxuM/TSMWQfgYqG/el3S5XBZ9P4PTZs8q
dPXE66gz2kyO9LSN0mU8TgkxT1MgfZ7uKLWOAvZreRyrQRkzGyLyUwT8lJvkpwjyWRGgjHmX
XCxjMzxzPvXptQ8eHLDO2LOu1hkbJ1yly0t3+PQZ5Ntf5vSZWOblIZZ5OfAbCp+iLgttoEUM
F+XEzD2jvwPGaIzZjdC/EfPAn/UHXm0QvwjkuBz6UvNom7eC9jBZb91B27dq+reatncraHtX
S+GE9o7ZkT5wjYb0bHBvhXurEM8qgL8TqCw6040KqKcak/VUAfLkukC60ZPtmT4vF0o3akIs
8xrg1xUBusH6UkzWF1IcpXAa6MZCsKWiblRAHlheNgTQDeMegYOGKLFU3VltWm+iA8QTdUcM
16dlpHfd0TcX1P1ak3XvAhlt6QX6ps/LhdK3tSGW+VrgtyUC9K0W9Gc5zDXcaqBvy6HfKeqb
C/LA8nKDbK9qqR7VUA1Sxih6+e+qPLdA2W4yWbYtIAObe4E86/NyoeR5U4hlvgn47Qqfgep9
M/Cw1SQPm6GstvWCetfn5ULV+9YQy3wr8LstAtqx96BdeojiRTZPa9COPQQ0xXZsM+SB5eU2
iuton4D1ExroPye989C/VbRvMEPuMdTIPYUxcq9hDu2HT/P3E4z6CEY2P8agbbRBmYrx+VxP
V9vNbVCXO03W5TaQudZeoD/6vFwo/dkZYpnvBH5bw9hutgIPr5vkoRXKancvqHd9Xi5EvYfK
JyvzXcDv7ghoN9+A8dbLAeSGPyvStZutkAeWlz/L4zEHmU3bRg/JJVPltnM6WUApZNHwmbRX
6KHIpiOsyfJIrJG2rA3yaGsJzNaupGHpIaZRQ66Wx3O5Qrsbq2uDYw3aVLHdjTNop8U5EaO2
vI8Qj4dH6dr/nuQjVjfeDCQbovyI9/1gPp2vsSXLaU6kf69tqHK5KxtWO+rczknNlasdJfOu
XVjiqKt2zHAty57mWNZQ1+ypcTRUepyU46G0/hdQ5ubYVB1gQu4T1pp9unXnnnISjGW447LM
3dYUQn6fROV0+twZLLb3GQtJtirz+Jp1cRowmOanmL7fridy2Ea8T1j988F8PZevzSQKc/es
fi6XQwbQ9mIgpfgVBSuNHXId8fUG0Q2guEJZ8aYYx1Y85VphsjGJIl1oZwK5q6i2MGn5s1D+
bwr3Hwn3Hwu0t8grWhaQtD/rak9P5c0AKzHcfdTJ8487eT4FykaiZXjUXwa8ni2CTvD1mGih
Hork3S8WgLxgbEv207HJqzLsHVm4jWJTjZA0sdkK1NymWo+rvtbpWFq3or6ywdVY524UXva7
GMXPXrbIL8tJGke0mo1oMxsxymxEu9mI0WYjxpiNGNsx4gwyjXJuofqypi9uAEOHrrc4X5jd
Tf4uuhUMgiT4zkhnJBttcOSwtuwvT86M1CtvFG/SDraEvKgGTwrw7IykwCYYrx/5U3vcvymF
ucsANnnipklolln38TwMMWaEu/ozT/zv0OEN0+VtZ+dpR0glLelIlzlWVtY2OcNHOuPJL7NK
RvWdopCWBNIWgfQg1llkPVxPnaeyVmPcu+tSea4HqaStRqQbXcvcrmrX0kq3J6wM0FwLpG0C
abaNZ3aDJ3dqg3P6goosx8xKT2V29WTKytKGyhVLaC9nZWO6wzhGzdUr6nMDUHT864sjRZDr
YSrpqJBJN3v8fmKOtPequINAWhJI27tEWiFklvSOH278B5C2CKSjTZGWE+6QZ7Ok23Z+uOdl
hbRVIB3TBdI8z6YL/Ec/egJybRNIx+pIC7nSkeo66faTA/cD6SiBdJxAenBPSPiM/xuVdMue
EVyvB6uk+4RMOkQJ35GxaqSlKAVISwLp+C6RDkHCP6x+5PczBo4E0haBdF9TpLsh4Xtb3/nX
312JQNoqkO7XBdIhidmrX46e+d1LP+ISLpBO0JEOu4T3/dmO6vtO9IdcRwmkEwXSw3tCwn/1
+KqXJ8cPAaNJhqukk0ImHaKER793d/3Mfae5vRZI9+8S6RAkfNTBf33cHu27CiRcID3AFOlu
SPjZW39z+TUPXQ5iZhVIJ3eBdEhi9rf/2zt2TtoHXMIF0ik60mGX8Deu+819sXem8DZcID1Q
IM02117dUNfsnjSjrqFxtafG6ZhBuktaGUacXAcSPkQlPSg46bIwk5YE0ql60pUNnlqnx8Py
GxbS/5Vg2Zfz6hjehgukLwlEuixMpPe5n19y2Zl1XMIF0oN1pBc4Gm9pqmxwknCR3uG68fYp
/zzKJVwgPUQgfSlrARxlDXVLKpe4al2e1axP7m6qrXWUku70UjJcTyzhDemlKumhnZGurPU4
G9yVHtdKJ+UgdNLpTx2gSd/AuwoC6Ut1pBdQInWMZL2fA5ezkXSdtHb0YRFID9ORnuaqrnY2
ON1LnQ6X21Eya+pS0j3S57fV/+hXr/ORpvXSJ+R5Y/3QmpMWh9fcmXvDEvIb1pDfQK6QK+QK
uUKukCvkCrlCrpCrbwtXHxTHeJUUYuXJe7bzqMRgt5E4qDZKJ2wDiW/IQmsfkgEFHyeAlUgT
QP7uhCjnL9TBFRE5GAlrRvMNapct6IwFdXT8Itov6Uw7fylJJMliMQzTLyPz/UHF9RZZK/9d
/pKO3Y0h6hdocbq34uUJKu44v3I669gqQKpuwbq4QY2hPJUEdHwq7r7q+JRzJT9dqT5N8F6p
a1t4W+Ak6g4j9lq8kHvRxSqtW6KwFe8BP0m+vUxsADdC47bJT/Z5eVusXYgnCZmRiHp0gETU
7ZycGRvc2wVaCcVKxqKCZIynFRcwY0xgyiobGyuXOU3mL1rIH+eBdMJDTFAekrWz1rztNcnP
AD8/kp8fqVv8DDHmZ8K8umXLXG6TbA02YMvSLbbYk+tdtVUOz+p6s5UVa8CFtVtc9Be5cIRW
Jkkabu6B8lC3osSATZcoHbYDfV6du9bldlS7PHxvccnlFZVsdYF6G5yNTbWeRjD5n1oVGE2m
d5YpvWb1NoOhNfnxRN3a/zaAm/yNADSz31yTz6WbLc79jyWFDLAONAzTm/xoIU3V5LPQJ0E3
ooj6AQHfZ2fW5PPt6sXr1PdVkx8b8KlF0NuOT62wpUL/VGnoog30vBoW8PQmP1rY5TZQNPn9
JB7Mbl6RI+2fxe5XUGyX6uV7NkIojjpUyu7Z/nuHvU2+Z2zUW4kc53aKf0ob5ftrWNpRDv+7
i/uo7xbHK++yYi+2tvnjkEQ1zqFENf23Y9T0t9k2+nmrj1N4e4zxGbVDvmfbCN+OL5Pv2fcH
b9sPyfdTGQ8JibP0xcXOTPpntNf/bnti2awk4qBe1uhOX1Vf53a6Pa7KWv7Nh/OWJrZY5L7a
2eiZxBpuebdeo4O5GzPky3L5b0Vlk3ydVte0hDbyyxwVrhXOck9VumN6Q0Ndg+aFwtxRjql1
7mpXlbwQNMvtcTbQdM2mOrOursrtbGxUjIhHieBc1uB0KkH0pqpuhRzMlxZlT8mSxrraJo/T
Ud60gkUslx8pVMtXp6+a17RiibNBXherc7k9yoMSd2Xt6ludVXuxlEyUktpXiBZ6IEMlfTd6
EeggW5EdQhLIeBo/kxrtfNqwFNE+yXzaSHyXhi2hYTU0TS+9v5ve30+fP0Sfb6XvPE8V/03a
JB0gQ8kXcpPDvtFLJAlSX3a2GJz0xt0Qop5MlgANxniifnGVSdRT1/KhgWMNZBFsRLFDU8i/
2PouUb8+WQLPGQ81sKzP4nmJ+uXY3RCHNVD3w3tsH9VDkH4/onyNnAB4Hho2tvXnTYjL+lsH
YCmZvfMF0EyWc67EZXlOkJT4vIcYI5gBseGMFbYNBm44A3fn1baUux8bNNHpyo5Ff1vXBvds
5OmVtvjvHZYtpUbvtlmU+KzN9FoPlRq1aamS0qatoXhEWj+L57DYtth/74ha3KE97CMv2Htn
+tv5eJXPQ8L9lr5tpYFmYHg63kLvzCSyCjjKSM/Ny87PSM8szCvMTc8oyMhOz83KpP7sLBqa
kVNYmJuRnpWVlefw1Dky0gszcgpocF5BTrYSkJ2Vm52dnpGfw7yZOel5mVn03UzZx1Khbxdk
ZmTQiDmZWTQl+jx/L7kPJO1iUDeQEePmwKMZ5YnNgSo+dvlfPFXBJOjtDKT+oSCeaVT4sumT
aVRtFsiqQ80drYhKGmcZxQph+NJIw5+XD99KEIZs+kP/bEQ9aC8KVC1K2MzLDwYcCmFxMheK
yrHKzybqh4HTQJ2ZCi6A+wSZQ/UQwEpIk72zDO77g6G3gxo36mYGYgOocT9TatzpKLijNr/Q
iTbnytqs9mK2SKrGLLa0GWqzwypomLVjHNbrGQu9KqbNO0Cb72HabHlEvmdDmv2WLYba7M1X
tZn0E1od4d6b0Lk2kxKmzUyX7pD1KTuzIGMSlfTs/KxJOelZmXmTstILs6jsZ+ZmZjJdouFU
hfIzckCn8jPycmlIQVYm16mcvMJJLmrP3WzDDw2alEnTKdAG0RdycjKYchbkU/XKzGOqRkkX
UuX+BWXkZ5HBTGBBMlb5OzQzKKLKv6BR+WiqNHbaOCjqewm9Xgb3o6h65FN1KaVPvwvfMdfR
2qqnz1dS3Cao/O2dqjz/5rqvMFUwQHh2iaDyl8F9HFG+o+8PEpIvqHwpvN8XegbJQLtOUPl6
QeVXCip/m6Dyt+tUPi6AyieZUnn9DFNHDX8INVzV8NysfKZUmRmZVKnycwsnZadnFRYyuc9l
OpBRmCMrVVY+6FB+fgFTs/ycghxuNQsy9UqVnZ2nV6rCrLwsliBVSpZsdgb7m5lLNZxle0Nk
MOOXm8AKHWuo0A+hQgdR6D4BFDrZlEIHmqztqNhPhFmxc2XFVuMTW8c4TJkzQJlvlxV7o1+x
SwXFPhRAsUmB0BHvJ0y4RBP/pMmhhEOdK/ZUpthqVzgzK5tZy5xC2U5mZOdQTcihvdf0jKz8
TKZShflUAzJyszPyFdXJLMwqZKpRWAi6lJGZl5mjV6aMjEy9MuUVZufRpPJzmRplZORk5bJu
dVZhZgFV7p+ysUnkMNRBjowV/W7NPL+o6E8EVfRo4oD70fT9fCq6s+jTRaDo9bSybqHPm6nA
rxMm9u4Ki6LzcblDUPTRkA+u6Py08lmCoi8SFL1eUPRbBEVvJuovn6wDWiky51zRA6+DWKgK
Dw6wDjK1qWGls7PFjwjPe8+osnaWSbv40UfY7/AHAO53+GYvfhyxqosferfW4HdKxDBJWP5j
LVjbSnG/g/5UorguLn5wA13caLT40TfgU/4Bo/FTK2if/qnScbALJcR3W1VDHviJU32E3Afb
FjDMn4LRr77E/OW1K/b6T5qCt1TjwFiyd7J/IF7Xy+HMcgbHCqtA9i7tH9grT44OMI4ZmNkB
Bsz2DcBsgilmQ9hcsFcu+MFBXwjM+mAD1vsFYL2/KdYDb0DYKxdKrPg8MGOxBowlBGAsxRRj
ne9J2CunlGQULzCjSRpGjcz0K17lsIbum+nOMtnbG3nclvhtMtOiYR0p169kGKY304ncvDYa
mWlulrtqppOCmun+Qc30gKBmOjmgmU7UNXxWaPjihZ2AcaTjjwEF373XiTlO7MQcJwVgqq9B
Q5XY0+Y4sRNz3D8As4mmmO1Rc5zYiTkeEID1AaZY74Y5TuzEHCcHYGygKcbCaI4TQzDHr8Co
2UZZYKcRlDXU3exc6nG43NV1jkxHratRtstL69yNnkp3wJ2Djwaxyonfaqss7hycJQCtX+SC
N/GzTOwcFF2TzgIbhXGr7N82s045Uc948Byvo35Epl8DfCo+l8Z3s8a3XOOr1fhWaHxuja9O
46vX+G7R+Bo0vkaNz6PxNWl8KzW+Zo1vlca3WuO7VeNbo/HdpvGt1fhaNL51Gp9X4/u+xne7
xneHxvcDje9Oje8uje9ujW+9xnePxnevxnefxrdB47tf4/t3je8BjW+jxvegxrdJ49us8f2H
xveQxvdDje9hje8Rje9HGt+PNb6faHw/1fh+pvH9XOP7T41vi8b3C43vlxrff2l8j2p8j2l8
j2t8WzW+bRrfExrf/9P4fqXxPanxPaXx/Vrje1rj267xPaPx/bfG9xuN71mN7zmN73mN7wWN
b4fG96LG91uN7yWNb6fG16rx/U7je1nja9P4XtH4/kfje1Xje03j+73G9weN73WN7w2N748a
3/9qfH/S+P6s8b2p8f1F43tL43tb49ul8e3W+N7R+PZofHs1vnc1vn0a336N768a3wGN76DG
957G977G9zeN7+8a3yGN7wON77DG96HG95HG97HG94nGd0Tj+1Tj+4fGd1TjO6bxHdf4Tmh8
n2l8JzW+do3vc43vlMZ3WuM7o/Gd1fi+0Pj+T+P7p8b3pcZ3TuP7SuP7WuP7l8Z3XuPzgU87
yud9046j/IHC9wLXQJgy6kkRBhv8UHfxE0GbMC5P6TDqYeOoqTC2CPA9FEuIE7kaOmDBPhXk
js8sJ8AYnB8PxX8NcIywzpkubEy8HGjwYd3ATjIYEzSDjKOF8tm7necuDjgwyl2ibh0hrpNV
0D4wpJQnVDv5bQk+aJU7nyZypS+p3j+Ac0BtPQg4jYho8GnV0yYHcPxjx9/RvwlSbMAwInxi
PNfw06+5MLDiziG8ZSWdfe0d75841T9d7H9qMXhaLzfWGfAkB2gVe5RBEDsWbrEHvodiwzmP
ukVKeYvvFuBvPWXqLcZJnvDWFcJb6QHfssL+CP5WXSdvKa3wXN33t31I4C/R53ZohYN8iT5X
2IbDnZkGOEEwETlBmJOErSJWQ+ZC+5Jbz6/Rl9y53eKnS19y69ky+pI7r1tsmfmSW8+F0Zfc
+d3iIpQvufXcmP2SO4HSYb80FPwXozRW/XLl93bMf9YdKIe93TIEnpx9TFKwRmhb1+Bk6Df6
s27RjYGdj8HC+OTsFCFOlN+2s9DvSx0nZ0NdMi0mwT7rLiHBPuu+mgT7rHtqwKc2+GTK+KNv
Mb/RYNzY0tVs0vGjbx73UoDfui6ReDDfb01Ix48Bb5LnC5SPqdlWyjZ7cSn/mPqQlOj/YKEA
9jj/VWLzz3ddwz8A3x7t6JAmm0Eda3vE/xGiN3ax+oF2nJrmqiglzc3y0TFV1+jTYR23jQnK
B+BsXO+wxVzD09nSX03nkVg1ncSojumwan97UIYch80EFcd/Oot/CD+273714/SCjh9ash/8
rh9aLMdh8yNzoonMA5t3eyTh7VlJJInWSF8K5VAP/lGwYhsam1asYBbDMcPhgB99UW/8D0sa
nI4q/xnBjY7KFXXuZY4Vzkp3o4MOxT2uRo9raWVt7Wrx11OKHGPLHFeybdG549SvmXXneHuc
jR5GfOy0Ge6JjmkzqsYF46NcTZ3S4hx5GA/uqsqGKkeVc6VL/ua7UaTOT9Ee0wj0hAA/+46x
S+saGpxLPc4e4UEpbo9cBY6KBmelZwV7a+wSp6fZ6XQ7ltbVNq1wN7KScja6qpoqax1jm12e
Gpf4qIL9LM402r9S2VE//PbwRBtZVvgr6nP4+n2s/Ns64/aiWKBYdBQLtTM6ReiM9rXoxzmr
oOXmux37UXM1hL43jDbvY2jHtYC2gWtgK++ddMzxCI3xOH32NH3WRgrl8C+p2YiRRpDxdLCc
LSWRaZISvlbqQ9ZLl9LO1RDSJilG+XUpnrwjOchpaTAdW7Ef9hRNZz9hG29f4H8IUY9HGgZd
+ygw4Ukw9VcAbXU0tNNxEO9OGCfFwdpUP5gGfByex8OKSxLQY+sRhWAGv4QrG//FSMoPB7N4
4yXlXTYgyJaUMEZjmqS8myLnXP3xmvWSUsKDoKvJ8sPy3CYp/A6WS0XhhT17R1I66WzK8rSk
POdDmGJhUkE01zMMvm8yaa7XyJHWzwr2rQA/P4B/Z7BYUr4zYGy2Wb2l3KR7Y4rVT55sgb8R
DJfjvC2O2qJ+OgVnycizCEOU7yTk7kbf4g4ml1Whtx9Rz0uIVtNxxKjnKByK2dL5txSjFVos
zeIBpDSJlLORnNFMbGZeem6+3G5kZGSOp+5GZ2NGel5+Tk6m/Kkg+/4ohwWWl2em52dkyV8W
F2Sl52bl5GQV7O2phI2bjGtJ4CYjyV8K7BiBgVT8hlE1HUHTGNVhS25HN4G+k0Hj5dEyzIdz
1i6nVK6k4SU0fKZw9NgcGmcuffa8vPQnbixKAp75kQL8B9n4CSPDIIzxM0JQnVEQlihzoh5L
kCF8apgH9TtAmLlKgflv/rMq/FDBQdCDt4N6z4TwIUT5jW8JVHouvMtVuiSASs8MotKXAPwq
nSXx4G+zk9T9jWoTIKlq2QbhsopKTEX5vs9pM7KzctgJH7oAY5WI7qASNT1a+hb5tzet9G+U
rAI5INIpwvb/gcInJ4OIej5mKoihKHJXBxC50iAilwrwi9xoiQejyKkiJ59IJnwETKRDVMwG
QCHPLWcnx8hfn2bnZOXsDfTAWOwSOohdVY/WABM7OxWGaCpyY4XWTy9ydhC5GC5OIGZTA4jZ
rCBiNgjgF7PBEg/+tovZDcoUkn8uYjHttCXJW3eZMRaHWPQ+e6IjK2ec4yqH3CXYay6asdhd
2kHsFvdojcTTf0lU5PiPnKcIk24D4ZokiNm0AGJ2DYpZV8RMWUJSjiK4Rt4C6qBixjegw3AZ
hr20l7k38CNjcUq6wOIUTf/FGYgTP3oq2sSeikQqKCUhrsvMbar1uOprnZrfHu78y7ZwZPab
K2hSkGWamyUF86EtnC/s0UX0jmWaVQbLNKsMlmmKdGkqyzQsdEYYlmmmB12mmRF0mWZm0GWa
0qDLNLMCPo0CHTF+aocFG+On0cIAtOMCUJFuASgRrGeFwQJQkbAnMMipv7cr7bt/IYNm+ho+
k1Js73gKJdscvUNq67C4U0//XCmVye+yybh4S7x8n0n/PGKZKN+zybhp1rHyPZvXOm4tle/Z
9s9nbbZrOutQHUouNqRbE6XSLbCrdF+zq3Tro1W6qTEq3UMxtmuSyPdo6d1IoU7QVleucNW6
nI1qiGAaHPU0SI6xuqS2vqbyOrd/upoal8YaZ8OYRsec8mkOh8EODf1vEut2bgR+R93QYCJK
sNT4s84TNY7pT1sNMoxQweb3q5yeShc7qfdbXRR7UcRQxHq2KNQefJHQg7+xwyKSet50f/rP
QbJg5jYfTOq1JIfcQdLI42QC2UXGk69ojEnScH+rO09STPV3pBzy71IaeUaaQN6TxhO7JYsU
WIbT3vvbmtlm9fPy/rAKwTjJEmaA82FmxA4z2Dlg3thnXGnQaXgcZn7ZYg77NGM8dDq/grTY
XOAkSmQ4LBzNA1OYKHOqpMl4+ndJSZPx8oykpMkmdt6TlDTZNj+7RUmTjT4KLEqafAA7XTeA
5SZ4jsEA1qQJVrZQKjOf8qGOcO+Qp6e8HUzwNfJ8Qsf9FfKCikU4BFK491rVg6ccFmVBSJ7+
imrTLMYEM8Fymnbjgy690Wo6xTFCmrHCGXuxh/z3W+LUe28fNu3GTv5dygx3HluineusdDvY
76OlZ6TnZLMVkZwMdu5qXkEBO7yVHQ7HTmfMzclhJ7JmKvEzlUOexb/8ZFj1ksmGwReQmLFa
LiWB1VKS/1lgYGuHMSLbvKic+2wnI6iYUYWTF2S4y4P7K+n1aopSinlURK+jWCRPC+rVUtKB
/wSVTViEiRMWXuzE+Axoftz7CKL+Fs14CO8jLNL0g0Uanh4/yikJZrn5Qk4p3DO1nAc0mVpe
R9Rj1hbppi9nBFDLuV1Ty+5M+enD5aUGa7F/3bVNuPfaitVFjiiixokS4tiLO1XLLVbjYyoX
21Q147/hIR9faVfvSbR6f0i4b4thajkfClHYaVF0o7NR+T+vTrnKCqGTe36oo97HLnt7Jllj
VZsbRNU6Tmcqf60kgaI/RQp9axC9DhZ+W+pSULU0KmrKrzVEkwKKIooZsqo9CeJuE9K1C9Mj
fOrTStRTBK2gRilE/WkYvjjUB7YeWCHdSwU1SoP0koj6Kw4svUy4HwBbLrgaFQlqNEOnRjMD
qNG8C6dGfKbJSI3aJEEtLMo9s5JbJK+qRjZ1PdEbq64n0t5GUDWSraoUwKraBKsq3HujBKtq
FayqYA0JtYZJcuqssMuVrULj/c7dSP+EaoD2hjk9Y8WZEYLiRMNfKxVbK+lLBT+JvjWAlmCy
8NNwA8GWseNQR1NMpMiiQnU5vRZTdFScaMHuWIUJYK44fSFuLFEPAo8j6jEzfYh6nnA/4D4O
BNsh2J/Rgv2ZKNifLKCTDBsJ+FnGxXDPFac0gOJce+EUh8/kGAlwsdAVJEJX8JCkCq2RYMvv
dtItnC93LzNmGdqfGMH+CN0/h9D9I30E+yPct8Uz+3MLbPid5a5yrVS24pU55E815XWLLPlv
Dl/FyEjPL8jLkbfOsA00GQWF5dPZwLpK0YWMwoLCTBOXvReHrLEarghBDfvDXztNyU6GUbFT
1UztKhbAkGMqFdVrKOZT3EBxE0W1of3qL6gHV8dUoRs4DK6xgirFCarUB1SJdwMLICxR2AqY
BI0wt1/zBft1g2C/bhLsV7XOfs0KoIZlF0YNI2Fjg+F2N0kYXQr3xCKEC/fEKoRb2Qni8VB4
7sx82e3tEGIsvDEhCK/5rQ7KX7bLRqIiKlHTLlHRkmiVsyOzubD0E+InCjtu+CY0Xmo2YeMY
/53MZKL+om0KpCeeXX9NAEGbj4IWJkHL6iBoWd9GQZsdQNAW9H5B4/Ni+nB5gzNRfyytTbhf
LAmbiy3qpuA2ixDHuoV2LEZCD9CTk55dUJiTnpmZm5demCfvvc3JyErPzc/KSi/IoWNVszGN
BdPRA4LJD5iPoqITRcspCmaHosgQio6Cyc/3478QzHfiRxH1Fz/4Afp8picZuIwCwRwC91ww
5wQQzPJvbwso71AXtq3SQP+9V7in5aOGC/e0LKlg8l9AnDYjK0f9tzdAuLHQ9evB1pBNTLK9
hhZaxRbay7PQarZ00hpaQOhscM/7kfx42Ri4T4Z+I9/7E0/4ZtjA+32S4PwWtqvn6gDnpvBl
dNJNPuI1v3P+TZEp7eqSueOo+fFljbhJ5hu9accqyNLjkkQusVgMw/SLAuV8s029eBz1AjCh
/JyUON1bZjftzONbXFaqMdRNO9cGfGqBsZzxUyvQ0z9VDNYCXVvA2oFAZ5OU60o16NkkC+CF
zs4mqRK6qcHWXyShgCVhPYZbb951tAtdx2iDrmN5kAzrz9/umOFA528HzrfRcdvzOuEhJigP
oZ25oudHPXPF6ufn2m7xE+jMldkZWVkFBSbZGmzAVlm32DJz5oqei1gDLuZ3iwvdmSshlUmS
hpvAtr4/pcO+Bev4cxRXX658UU29Dc7GplpPYwjHrATKlFmN631nYL8N4F2BNbh/t9fs31XO
uI0h46RYf1eAhV1niSH7LLEd7NN1QppqV+A62AzKx4Bd3b+7MOj+3euD7t+9Iej+3RsD7qO9
TldK/WHserPBPtrrzG3ieUWOpBwawmbst0v1s/Qr7/KXynbhF+BgyZAp1j/hByLZxGJilMP/
7uI+6rvF8CvsrNiLrW3qASWJapxDiWr6b8eo6W+zbfTzVh+n8MaOUt4etWMWP/Dl7XjlwBd2
8O7b9kPq4SwJiR1Wd9ih4f+M9vrfbU8sm5VEHNTLGt3pq+rr3E63x1VZy7+zcN7SJB/EcLWz
0TOJNdxwBAJzN2bIl+Xy34rKJvk6ra5pCW3klzkqXCuc5Z6qdMf0hoa6Bs0LhbmjHFPr3NWu
KnYWhmOW2+NsoOmaTXVmXV2V29nYqBgRjxLBuazB6VSC6E1V3Qo5mB+Zofz43pLGutomj9NR
3rSCRSyXHylUy1enr1J3dNZrf7GPnfWxF0vJRCmpfYXrhB7IUCnwvMYQ+i8B9mPYST5V7CKq
2POpafsuDVtCw2poml56fze9v58+f4g+30rfeZ4MIm/SJukAGUq+gJ+W91ENT5D6sgO4Je3Z
qkNAA4YQ9Zc5xwtL1JnQSeA7G/m37UXCfMN8MLnsne8S9ZcqlwjbqWpgjS1OmQGQ47CJuruF
vST3C8vgD0H6bP5lK/CWQJQjxAfBXMybEJf1tw7A9i32zhdAM5kohw4nwrxHgqTE5z3EhULv
UWw4FxlM+nVsOAN35839GvcY+U6d4N1C2jpM/MpxLB2/W2DhW2ASWG6TrR23mLC2MdGitI0e
ZQXDf1gVsS32t5+HbPXGv8adrv7SZ1sflTdvvMqbo6+J0yny2UoIm3lhp24WpGfkFmak52Vn
F2Sm5+bTPxmFOTnpudls72JBTl7OpOz0jJwM9iu3mYXpbEdjTlYe/FhuQU5GYWZ6ZkEh82al
Z7MNHwVZOfLvZGem52Xl0tiFebnZmbkZuTm58jL0Xvk3EW6/8ISD/lqS2AjUEe2vJRn93naU
PDeuzIwr25tT6HUw7FMZThUjgz4ppsoyDz7V/h4t/n+j71TReC7hMAu34c/wRgFfUYKy9xFG
C4lw5QvVUaAcg4U9LMMhTb5HMhGUp5ioZ+rMExT5e8JM/r8Je1eqhJl8lzBj79bNB1wfQHkr
TSlvp2Pfjjr8mwC7FY1+eFvWT0GHiw10WO7fCDtZjHY9soFKKhxKt0ZOU/0R7rGWjeoPcls2
GutwjqLDchvRV+i39VPpHurX1qkOe6cwHWaU2E+asN+ql8U8tzA/JzMvnf6hWpBBg+XTXjIL
8gomsUtBpqI+uZnyhsdsGpsH5FF9KszOZd4J/JetM6liZWpCmGpm5eXSlLNzC/Iz0rNycnIL
NL+3fRH5CCw+xoreQrS/LaYquipZ/Pe2o6g4K0o7iIaoOzSTSA7FdPr0ephjd9E6upm+o/zm
tjo7sTak39uOEpSOK/ogYUfMpcIumDSi/uY0/w4hHr4l6A/pXQ/3CaDEXNFvFnbH3CLswmkW
NqOt1Sn6/2fvW+CkKs586/RjprtnenpeIPKyRTCi0PT7oeA070AiQSEoijo8BkFxBodBEDC2
zxAjihq97CPKxkdM1IRsInGzMQ7EjdlcNd7ESYxJdOIr7q57r781u79sstFbVaeq6+vTdU6f
fszADFVwpuucU+ecr86pr756fPX/X2Si6BtsKbpxNKlYr28todfU/gHbnAN6HTTRa75YgS4I
kNhmM72m3j3MNpN42N0p1+uwsM28H0XbCn7QnvDb0OsM0eudrIWATV4kRpwoM6lELBRLRrCp
I/Ty0WiYOIKl08kY0adoMqmrTyZBUofT4WSU6xNWvBA2q9QwRkPxMNGlNNlLhxKZNNajVCqd
ioawncSmOJ4kkFI3sm9+LJ4uYd2DKtuHCln3hMreWqCydbgAuikQlV64yLqGeoPKNqEVbDJx
LX79egPejRtgQmW3lVRZbpsbgcq2AJU1rmWot6Gy3DavYPEAs6FcZdcB27wJVBNXA5XdZlDZ
1SYqe4UtlTUbei1W3QeHUHX5OiOZ6jYD1T0ATHIQmORDJiYZxYXqBv3ADIP4QTsmeQ5RXdKV
2qObwnCC2LxEOJ3EjdwIbtlmkuRoJkqW88RTRHeSUWYJY6koUaZYNMFauMloKoabxZm4wRLi
uxotYSSWThAtDRPdjGRIG/tu1nk7llIUlRi5Su9BhfyUQqUfLKnSuqpOwUdjeFuAC+oqZoU3
4c+yGZ/vwdt2oNK7a67S3ApPASodAyq9AFjhVcAKbwIqvRmodA+wwtuBSu/Oq7T5/EWbKZ32
PNt02sdz3odGaQtHhwonLRqA/8KP2Kb8F0YPnbYxXG8AHTEe45MWK1kN1n+tjE6bh0rptC9G
VnTalyArOu01yIpO+1JkRqe9kj27mb2lNtZEuBS4CDSA3FtN50/Oe2hpkm/g/Zt3zilBs72y
xLz/xYb2DBf2MlTMPLyyonn/Mmi2VyJrmu1LTIRdZ0vYMpwCrGm2jUbYKLqMZnuNiehdtkSv
gmZ7JbKm2b7URLBNtgQr7Usgpdku9QZL0Wx7skdyuvtf9Wa6VCZPLH5t5WY4us00NKxTkc6l
LTtmNNOXcfO6TWamuVmu1ExfbmmmOy3N9FpLM73O1ExfZqj42lnFdznw5vOB3Nvzuithji8r
YY4vNxGqU1JRXTbU5viyEua400TY9baEHVJzfFkJc7zWRPSNtkSvwhxfVsIcrzMRbLMtwWpo
ji8rwxwfYb3mMYAldV45LKk2MndimWHFkjr6WVL58avx3x8gr+Ux7mK+R+ritwcde5bU9exZ
2e3gehDfuh2uAuAsqRvKvsrBOk3lXeVk1ajdq/TKeI/Bz3qMxUqEPeWsRNiDqmdJXW8hnJGW
ck+VHvtGeWUsqRuqkqcij32jWMLSO/JidVUllh2PfaMUMpbUjVVJUY7HvlGaloJ3Yj7ifbIt
ltR5NWFJNeZQsaQqllTFkgotuGBJJUdrwZLaY+m+v9XSff8aS/f9XmQFv73N1Lkf5rcR6WBh
pJ7cJXHu52kVS6piSVV0mIolVRWLEcGSejVSLKmjhSW1BzR3oLneLvF8s2muRytLKsX28ANs
jyZ0DFlSC/ps0VgokigiM01FoslUKBElAIeJVLh727IeQmaaiBJv0kg8HQ1FYpl4LDowVDeW
VxnDwZLqwAqs3/34Y0nlaDdpJBBuasmSutVEpa+1UGnFkmqqipWzpKZjkQHjAblKjHSW1GtM
itwOiyKnWFJtFTkbLKnhNAHEjUYyyQGzE/JiN9JYUntNitlOi2Km6CtNi1nZLKlpQn9KmwQD
9pLJi93xzpK6zaSYXaeKWSXFbChYUmFxGoksqeNtsaTOUyyp1RY0K5bUbk3fFEuqYkntNtxT
n6YhR5fWYJqmz3KaZrvlNM21ltM0OyynaXYiK5bU65AVS+ouZMWSutt0AqjbMAE0nlnPmyUT
QDytYkkdKSypupdCrXgbLe7Gz9ngbZSmzN/blLdRT1A5heWoexUDqoipIja0r0K04LuRYkkd
KpbUPkMHlpvg3ZIOrE0TPJwsqRT8h1EnkuzsB4ypQRssqYMmLKkHAS9cJ2BJDQKW1EFAk9Xv
EwBEBxv6LVlSEymC4BOLJWPhUDwdC+u0iQTOJ5yJhMn6/3gyxZlLCaZX4V+KCJT/IYgiA8P5
MLlaVsuSWo+m46IWARM3KRafg3/n420J3j6D063C26WUgW44WFJ5B306O0/KM4cNbGKqzu83
B4nl9/PBRM4SJFjqPoMEPdYqJFDHLkWFLHXbTdRyT2VqWc2Qn/G4HZZUEs+6BWMqYbnNz3nW
oZJqmTNhSeWqTlURMN8NgvjBOqC6QI2DlN7xU2x2TEpnShlNl/XobKYFpV7H/SiMk78Dtb6h
XL0WW6hX8RCm/hcyozrxXR24EAn2AIH4QVSvDs3CWwJv5+BtrpTgsVxmVM46wDunnBmVu1hM
BKrDVa2FqRpXnVlAdRJI0N2cgwSixVyD6lxrojrXD5/qmDGjBqkXYi7PhtqpifggYEbtd6Ei
smF63AYz6n4TZtROQBopUx3K9V0nLGk/YEnNUdVZxp5QxGSqs5l2byvb7gwMwT3lCrS0DAXi
DKkuXGRduIi7cPFzMHphoUAnMzt2Gi58QoHq8bvzoAUlGVJdSMDEulihDCDBkNqGBEPqGKBA
JwEFOhkJhtTTgO2xUiBue2azZ5J7LzAo0A4TBfrc8CmQGUMqpe9l/j8kfhDEg6DplwUFHAF7
0G+DIbXfhCF1EDCk9oOm30HAkJoDrKidjYBR1U9mYrez6e9iqlI+a2H8JX9jMYITl4lRB5pk
IV0ptiYZGz8Dx+7RcnW8pgx15EypHlwQPdhSeHC/po757ojm4mzW7ViMi/gyvH0Wb2vwth5v
V5ZkSuWzx+NZ3MNsEmdKPRM0H7mPTgPz0eFNwdlIMKUuBvZsGRJMqZ9Fgil1DVDH9aApeKVh
JnuniTreMDzqeDw4N0hd3mrIlJqmYaDoiLzwjlYCy+tMClpOFbRaMaUWFbToiVjQdpkUtBtH
f0GrhimVA+YbQfLp1BZlSiWtwFPIoF4qlIqnCQB8JhlKRDKxUJSAvGNTHgll0uEBuwnlxfKU
ISiWMp5UN0OCrwVPqpsVS47wPoYVO8iTutukWN504tZ/NedJTYt/AybH5YXuROJJnQB4Uucr
nlRkypPKZpJKA5gRy/I8cLu4QLnKjHi3nY9w6f8EPvhYfmpBP9bi0NB6CU/qTUjwpIrV1Tdy
w4oE4Be8yq7bDkf2l/Okfg5Z8aTegKx4UnOmZ13Mf4We3a6X6o/yzjU3GmoKshbEDLvkJsM7
t8QuuZFdUAq75CIkVitYzc9UwqLKbfZNFpk0YrgVZ7I0c6oxrzLItutLyOCxlIFUxrIJeZsC
tecFcuUF+lxVAk2SCzTv6q2JFQtnrVhoU7CJEsFuqEowcmZHX/CsIBHFphReiRS5qqSgnnR9
Nh/vkDz+iTIfrxU8njRsSf6D5XwLH4KANOYNj4mmpK3za0HaasyNlYKPTkQ3I2nrTaxd0sfi
X1BtgRHfLhlHdXwcCmknWx7jZvAWcE/RLrnFUFNU6k58q6U78W2W7sSft3Qn3mvpTvykqdMv
zK+fGYqNtDoqdvq9xZ7HkaJ0VZSuitJ1KChdb0GK0jWHjg9K11tBaw5WnF+UjE8WV5wW/Yzi
Mcv7TfyyhpI3jlSU41hFTCq4xwCn63LA6Rp2yzldUUTw2HQC3rigHwyr2+B0LeaNS0TDoWQ6
mYiE4olUJBSOEBrGNHWPTKWSyZl0elxnTA2H0ulUmrinJDN8PxmNhCLRtM6vGk7Ew6FUWqeJ
wjeMEpLHTCodi0Rw0kgoEY+mBtAdzL4ei6fLCom8Qugr6H/CCkGUn1IUcq2IdOV0Cjl9jfk6
/CXW4zSE2rUboHAMLYUcnzRIIEHvaqSQ40q9DkxArAeON5vBBEQ3mGgwUsjdZqLI+20pso3+
ebFCf6fGCk2dYBzACcaECDII2OQeA0SQnYAIMmtCBClTaBlJVUmFPpso9C7mGhgORZNx4tcS
TkXjoXQ0GQvFKNFqKhUnTivJSJLs4T9pXYXiSUqjLHQqlkykoqFUjDK5YeVMxLHyZCiLWyQe
isbw5akYYWSMRCOUMC5BPN3upwpyrJ5vVWDkyn1twRgOVO7vWCp3PS6gunJPxUcTeFuElWgl
m0QRyq0TyvGwvSbKzS35JKDcU5EgVEsgQai2CCj3SiT4Ia2Um7sL9QD30+0G5f68iXLfa0u5
jWNcxZp82zEwzX3UNOfypvkAMM1hYJqbzUwzoHQNAtM8COjWc3ZMc5poMimZvVSTcMnG9iyR
iWHjmEzjP5EkcalORsOEPDWWjhBKxkgqqlu7KGFcjWH7yExjOBMmB5O6aUzGscakE8m0njhN
lTKTxJYRm01sHhOJMNbiG1hdNvzPzpcKubr2IjM619ts2+JmFMPbfKwK5zNb3Ilf/Vqc5gqc
fguwxdcMqS1uRoL/kNvi+UBdzwe2uBOo61qgrlcAW7wF2OJrDOq610Rd77elrvnB4GI9vauE
nlZDqV6uxSVN6zDgb+03429NCEr1TkCpngWU6ihQ2uKiDqKnN7MRf2zCYtSfNBqNRuKJUDgW
Iy4mxDKliGtpJhWnJOSJFLN4pPwT3+5omnGZR1PRdCyU1NmR80ypUWL5Co4QwxmJEU/waJou
roiliNLeyobEj7EgO/rkqntDwUQBVN27ClRXRp5utLSt6CI28X4l/hpX4fO9ON1OYGk/V3Py
dDuWllOXXoQEdemVQHWvAg6zvcDS7gSW9nMG1X0SlDqouk/ZUt2iiZRiFfaVocJ05ZEGVh45
5CuYgk6RHrnkFMxhoMJPs/gXaLVwIB9/FcelqpcSppYzuNLqokk8N2dHhecSFSaNmZt5o5US
HCdi6ZnJUCIcmxkP0UVLYWyn4mTpBWlrhiPJTIYzllMC5ESEc5pHsc2byRWEHJoZCWViSeOh
WJxAQ0aTxLqGiUKSdmw0koJMzMdcGFFw5Cp9c8GkG1RpX5FK16E2pp4n4/0gi5+OVSGFt0/i
s5dQTx7Sp9QYC3M92gNU+qayVLoOuMbxcyeDxnMQ+LqfDlQ6BVT6k+x6PxtC41By3UCle4A1
3g584PcAlb4JlWZinmRK8Ti/LCbm4zXvQ6O75TIxKw8pxcR8MxJMzGImslZMzF9AVhSPtyMr
iscvIiuKxztMzxK9/wYyI4C8GawE8rPGzEZ2PyNP880lnIeseZo9Lz1Xiqf55hJeRl8wdFS4
sPtQMXXezZV5GQ1QgUyIoYLm4rZLxL3dRNy7bYlblg/SQB6x3N4ol1H8iRLxv2gi/pdsiW/u
qSToISX9eaNgMnrIO0wE+1+2BJM4Lw3k3YVh/8QoikMiyjcM7W8uymFbolg4Mg3Qnr6vIIG5
aD5kjyp6cg3aEaWypaiiVTtCUUXvQ4IqurgdUS1V9J2W7Yi7LNsR+y3bEXdbtiO+adqO2Geo
kyezivBOVEwkvc+2E3KJ9sK+Eu2FO02EuktSje0b+vbCvhLthbtMxL3HlrhD3l7YV6K9sN9E
/PtsiV9Fe2FfifbC3SaCHbAlWFnthX0l2gvfNLQXuCjftSVKVe2FfWW0FziX9SmAy3q+DS5r
4idkxmW974RuJ0Aua95OeBxsH4JftY08LmtO90GU4Q8OF1rodEuP8cAX+jwu9Xx+nJUhviQo
CK4q5rLOoKHgsr4HCaboG9mqqtJc1veCq563dZWDmYjyuazfA1chcBUCV6GCq8iXOASuuqCE
hHql/bhhtcopFqvIHi9nFdnjqHoG7HsshDNSDj9e7coro8CiFSO4pu+tSqAKV14ZBRPtE2de
sPuqEsxyzZPx8Q7J498r8/GOshd+GaWQcXAfquol2Fp5ZRRDtvJKk0xynGaLfHt+Tci3jVlT
5NuKfFuRb/+ttDFCjtaCfPsBy2VYD1ouwzpouQzr7yyXYX3FdBkWzG8Lc7wivbGvSZZh8bSK
fFuRbyuWZUW+rYrFiCDf/lukyLdHC/n2A6BfA831wxJnR5vmWpFvDwf5dkGfLZMOZWJFHNmZ
aCZBHBgTYeJwyDiyiZtxhHgcp5IxfFEmEUsMDNWN5VWGIt8eWvLtB01U+hELlVbk26aqWCn5
djwWjsUHjAfkKjHSybcPmhS5Ry2KnCLftlXkIPk2Q5nCHbd2Vs8Qju1MhKy+Docz0URswPSM
vOA1FxW84aHf9pRBv+0BBe3vTAraVy0KmuJFNi1oZdFvx2cEY2HCq00bBQP2ksmL3fFOv/0V
k2L2mCpmlRSzoaDfhsVpJNJvT7VFvz1f0W9XW9Cs6LdJT3qvot9W9Nt4+7LhnvpEDTm6oQYT
NQ9ZTtQ8bDlR84jlRM2jlhM1X0VW9NuPISv67a8hK/rtr5tOAX3Z0Jmeyqzn30umgHjayfmx
OGY9uzV+uJb027dS+u01S/l0StilT6eQk3c4munxeoLk5mzPxw+xeJrQcrvCNN6B//zBFV/K
ZVvesD+/hHawQZ8+ItMsOxtfXlKqAbZ/fFYq5yt1Qs7OgJBzqkfI+R2PkPOTXiHnb7xCzjt8
Qs7cWCFn80lCzsdOItNBbbg8BZzDxL1sxjicd0uxuGxHn/VJ3aXDIo1wuAhay2DxtKJEFk8t
TAufjq8zXM6OGBKxs4VnStM6q7dc/VseUIqhFEO95eK3LHpjXwa9sYDT2Bvbwyy5OZV6Ct2G
JuFG0lT0PJqG3sdbizYDzdFmoiu1VrRHa0N3aePzFvJrjFr9KS2F3tcmIa9jKprpmIYuwNsO
xwz0kGMmetnRit50tKH/dJBpwbBWOJxaLtV6ijV6bmODFx7WpJvKBgmeZ+P/pIPxPouTkd8W
/JAZrNk4B8dnsmnBKzWB67lHE4v972LTc600l/p17TSnugykp/k+m/6jeCMOXQbS153p0J9L
5L6AxUmedzh0Gch9H3LoMpA5hJcd+nNIL/ZNhy4Due9/OgqnCB8yDIbw5tzXJYMhNptzkMqd
jp2zwc4gHYOSU7lvNaFyDwL6diOQUR7dAJDUZgExLaoDIMt14Np6cC2gac96S1O/I5+c+r3f
B2jmG/qLAKDptQCCsB/EcwAoKRsA8jcLqMRBABjd30KIdcn8NFlYHCHQnoX07fEUYd9MUsTA
MI7iBOl4OEYQQBOE/zaWJmS4sWSE7CRSEXImRWBKUvFULE/rniaQgsV/CQRh4V+KjJT/IeBm
A8e1dPKK7UvIvGLTqeidbJiHj5i04AqEAypNxb86w2g9JaGfg38Joe9SMLG5nMVX4d81eNMB
jutQN9768LYLbzrYcT3un9ZJKjYZEQr3dXCBoak64OtgBr7kZcrOkUs4W2kDm9SsZ4rPyepJ
xTYHCW6rPAEw02A+CbocCcbtVUggl6xhcVKxrQOTAJvAJGg3i5M897E4qax2sfgEJICVScX2
eRafhPSli5CQ+GGTiu3xyiq2agbgjcfpJ3UK0vt+pyC9zzEWb5rGDdKAeK5OxLP1Io48ID2I
57zZkhUbYfeWHZcxfdNKq14czwKS46AXQFX5AOSVD0BeNfTbIDwGnlUdq7u24f/LevRfw39a
Jxj1nSg6Q3uSHwM77Gfg2D1aXiVdY1ElFU+C6H+dWCGduCQ5sAI6sYI5sQI5sYI4sfl1otPw
djoSI8nTWZUkeMjr0Dz8uwRvpLpahX8vxb+CELlR01XYBZ5bBwZd61mV4GQq1srUjWOVO1l1
wyedG5iKO9k9JrG4H6w9aGKTNE5279NZvBUJ3vJ2JHjLxyDBW859Lnh1M48dJ+97CRJgTstB
dbOKHSfVzaXsOKlu1oPqxki4/IhJdfPE8FU3fHzceDxIPalzog2m5fLVTb9TtM2CDnE86xbH
Bx3gWqeIDzrBfTwi/UFXzrK6IdZiv0Pe3usEvOtBUMUMgjZbP2iz5bygGgJVTBBUMYOAkKMf
tMdyftKO4sCwK3QXyjNZ6N52pkmoWVtm4Bg+W17h9JZR4dSzvy6swi6slg5c7F1Y9RxYzVxY
dVzoFLydhvenIReocPS2UwwrVQZvHfgOi/Dvp/F2AY6vxr+X49+N+HcLbQMZK5x6VIhOx0kW
XNyZAFQ4nOPSxyoFB0t7EhI4sxOQQHo7hcV5heNg95vGjvMKx8cqnBiocDKgfdMB2l2LQPvm
06B9cwES/pyrQfvmctC+2ciOkwpni6F986hJhfPk8FU4fNzeeJyIF2Q+n9SBiMVpB8cFvF0c
4jgCLDudTnHtIIh3ukT6fq9Ijysry3H482n7KbxEVmEOgvZHv3+wCD6PolsHRLwTdMqyLaDd
0yriqA103EC8v520b77FPtKS7g2br9Vdu5cHV5GZcD4Pzn8JJnQ4AfbCkYgxTcHZNN9bsZAM
Wm7QK4pwIhKPVvkzMDLFlldzT5ZRzbWyvx6sqB40BavgGfhX90P1oHPxtghvy/D+yjz1Ouns
6IMgV2BV7sabDr5Zj27G2+14uxtvB/D2IN4elbarWkGXygOqCu4zNQUJ3pkzkKDMC4NuXBJU
A+ciwTuziMVJNbcMdONWgjbbGnaPdqTDYtezaq4btKu2g2puD2hX3QzaVbcD2e8G7aoDoJp7
ELSrHjW0q75qUs19Y3iquZHoWCh1N2d+rRQQH8SRAxwHceQEx0EcucBxEEducNxNUIA5Bnt3
JJUPA9KjciVtLENJK3dY1P8Sb1kNqx6hktewOmi4CGq4aGm0CPkQ8TIhaLl7WQ5bwfXtwJN2
DBI4FVyZuYct56vkA8+8c17P4ly5OVGVFziBc0SYSUhgS3IFecxEQb6pFGSEKEhUqiBRpSC1
UZCvmSjIIaUgUkVAucXG43RBFwKMaCDeCSgokEPED4J41inigyCecwGaGTe4P4630JFn0sPq
y4Ri0WgkGspEI4QEJZIMxeKxUCKTToUSkVgqFI5GIpFQJBILxaOxSDxEPOWruFiubrFhUDeO
7O3GCuDGX8ONS54bK40bF3437p26ceF14x6oG3eB3BJ105i6cY7kMUigl49lafnio2YWH8fS
uZm6jWfx8aw/zBclTWXxiawP7GbqFmJxrm5fN1G3byl1s2uPWvVpDrEWURPxHIjj9ymOgzhy
guMgjlyoaJ6BHneTxU3jWSFZsCgWLv43UOK8XGnGDqONcuDskfUnDlzEHNgiOHAxc+A+jgOX
JwcbEXeUsFHc39uFxIoVjlzIV6zwZVI+Fj+ZFWgHUxq+KHkCUzIHEqydDqY0/HlWPuTTsDqQ
ZxNP8QVm8IFIwAcOp9zHo06UhhkmvpBPKYfrUeUI7qNNBh/6HWu8mB3j0+aHuQP3VgfVFt0R
/CnegAF3gFfZdQT/NnebvlYvbR8VOIJ/B5x9quAsKbjvgrNLC86SMvx7cHYhO6sb3KcMdQEZ
rDYD2ztseKuWYHtPIQHLjooqcgG2dxESa1yNXgrQU0FDAo9RA14LvLXCOwB1oAPAWxWHLTJp
REsuzqQZWrJ5XmXgyN8uIYPHUgZi9IDzXjDvM7htfe/aq9dtsSvZpLxk7rxk36lKsommkm2y
wM4zyjVBIte7ZcqlFchFCu2OvnLfTwMqxvD7fVVyMCTBst5GIZKguZE/Hack0hTzCyw4Wwfo
wbu9Xdu2b+nbVgZqn1lmrFRtdEIIc7+El9nG2wA3se0Lyu6O+DaAh1pvD/oaQx3lx97RPOiv
Hd4iw/Q0uKdoAzzNvDUQ8EapZDHYP1guBvue5WKwf7RcDPZ900VZTxtmrE5nne4XJYuyeFrB
asjaAILLkGPQIfRqnqb3kLY1j0eXdQNPCzBxu5VN1hLF+qOmL0YiTZlmdzB/bSfwxuDesU/Q
MaL+JUbPV+qA1izu/7JH3P8x1/68bFt9umzECeeQ++klHD/w5UYdP/DHJF43KLD+As1Fk8HE
3/CP9bn8tR80L1/SQqaxaaW7cOfWnu6u7r7Na7fwRbtd12ynuF7zurb1zSQVN0PUImF1mP5c
Rf+uXLud/i7o2b4OV/JXBFduvrprRd+GUHBhb29Pb8EFmcS04Pye7o2bNxBoteCS7r6uXnxf
u3dd3NOzobtr2zbdiPTpCbqu6O3q0g/hyIaeq+lhjsCm072t29azZXtfV3DF9qtJwhX0lP7U
FdeFdoqFMFsLOeIIdNyAeks23pJoKzwNWh4TNWO7ek1+2GQC/hdAZ+LqMIKNdApXaR1Yuc/H
pu0SfEz3Hh7HPIbr0D58/j58/qv4msO40/8irpJew227/0J6Bfgx1vCA5idNAk0sauctNz6o
zr1nzmTVMJE3ggQzcwoJqKQOME19PjO55JpLkOBGXAemqTeBAYgc8Nz5PHAh3Aemqe9DYhnF
V5Fgbz4MRjBfZGnJSONrYMDiv4DL4ccsLclzQNPT85bhPwA3RlhxPisZrSyuOO206YsZYh80
W1tQgoydr4eQurE4gJuJCcnzGQwp9WrqYrM1H1/u2ponaT/oyMkZYqOCZfIgIGPv9IPR/yYb
ZOxnk6kv4s9NfN8I2Xk4FQ5lEpFEhHhshEOpaJrwIMeSabJwIJ5OZCgnayTKKVgTsXAoHdUp
WfE1qSRFLAszxnSy3CAZj2U4FTNdFJDJJBPRSCiWiobCSTLJRnjP7j1mz7csMfJq4tqCjh+s
JkRhgkTtehflJKxik1nXfBo+msTqsxBvKxky0Ab8Wbpw2qvwNVsBetr2iona4YIDXgVMBgsT
piFBj5pk9yf3WMjifuaF0sz2NyBBj9oFFjZchQTD9FYw2bHdMGzwPRP1fs6WepfuGBcr9yMW
jrn5Jg1Q7lIM7lC5acXg7K+IwZ30c/pN6J9zCaHcOUAhmwUUskEbFLI5yuB+C6veifpkIhmi
M9FkPJSJpcgUG/HMwtoQI/TmMUKvHImkE0y3IskM8VvNpGJMfcLRONapeCFxOj6ejKWNzOmR
VIY6nqWIQkZi0QRWc6Ibf3McSGJRhuTqnisYT4Hq/gjwv63H6lBI7k7UXVf9QnJ3nQn6Kvyh
iE9tL053HRjFuEGq7vXAob8OlSZ3h+rO1xTZJXfnCySvAuq+Bah7LxJsyNcBn9sbDOr+jybq
/rwtdS8ebypW7weOgXrfRNV7f95GH9JyeQTzTldn3o5n3Vvl6h0B6g3837NgDSJqssEQfQ5R
b1LB7GBKFSHGMIGtXySUJn9idLVfNE38OiPhWHQmsaTheEpXokgkRnnRY2w/lYkTpUpQYxkL
UXf2dCpKdSwaSkYzxHRG40Sl0hFspbEGJ7FW38ZrtmMjACghcuXdUTAICZX3AdvK24qtYzNW
kyZsDQP02Hr8GTbg81fibStQ3muHVHlbga1uBsrbBGw1b5avB8q7ASjvlcCTdStQ3msNyvt9
E+X9iS3lNQ7SFqvuw8dYdXdT1RWWOc0sM4n/2LG/IstMPc8Dg6VVN0tUl8Bb38g1JxMlS89w
QzaUSMTjoQRdRhKL0XIeT8SJ5sRjMWYQI9EU0aVoNBLXD+ALE0TnMgXWjyhg0mgPo2GyDgW3
oTNJ4pWdpqb5TuYafMxFyZcZuTLfiAoZEoUyP1yWMregxfh3NZveLrTEYiAzN2zKzC3xYmCJ
V7N4OZaYu4Xn8spsPtfxCVMu5QW2uZSP57wPjdoWjiQVTnA0ACeHH7HN6OSguJRHLpeyMZxv
QLszHuMTHN9lNVj/tdDJAbIwQyeHcic4nkVWXMr9yIpL+RlkxaX8A2TGlvxd9uwxTP8+wRoH
/cCPoAHk3mr+f3Le7Uu8uVxH/hu89Nw5JViUv1vCUeBZQ0uGC/tjVEzy+t0qHQUEUq/NYSVj
BiZJMtBvkoH/bSsD5fgTDFAf0wnWV5gLP0Ei/DMmwh+xJbyV08EANQ8NhSnMhWuQCPcDE+H+
yZZw5p4IBZTPpd5aIeWzzGAfoQb7jBoY7FKZOrFIje14JSqDPXINNjSxU9lIuuyY0WAf4YZ2
m8xgcwNdqcF+ztJg/5OlwT5qabB/aGqwjxgqujNYRXcUOP/5ClwN7DjslTDMR0oY5udMhPpn
SUV15FgY5iMlDPM/mWTgBVsZGGLDfKSEYT5qIvwPbQlfpWE+UsIw/9BEuB/ZEq4Kw3ykDMN8
hPWkp+OUrXxpAASRN1smkBOVSanMnFgGuREJmCFukF9HOkrYh2o7LjdukD+04SIIx9B+rdWj
GQ6P9BgCjn9EK96Sugi+xcoQ92gPgqucRcsElhoMcmPe5BrNdWf+rENydis15mF25gX2rOx2
cD2IbwVx/SqN+cmUdxWR5G1wFQJXIXAVKriKpH6njKv0yvctg3/2dIslDG+Vs4ThLVTIrG62
hKHZ4CcdAJbhBQvhjCzpb9XM7d8ouWgNOPOSvViVZJW5/RvlEobelZfr7TLlqsTt3yiHzO3/
narksOP2b5RC5vavSYbCZ+KUBJHYmh+mwLSfTU+VsQbALGej3TyYrwEgdKpk2w0q2N2qhzuq
CGG+IiGE+Yqkx/0KSOPOG3hy9MYaEML8wnINwC8t1wC8arkG4FfIihDmNdMVAjC/Y5GOE076
N7+TrBB4BdgcCyrgjTRRZ9HE9eV0Il33vKdQtAyulnjeD2rN+cnwNJsM/5VGHANuW8pXCxyq
L8aGJO5rZ7gO5P1ect5O4c3vE/fc6dbveS9dbLhhqfE+xE9mf0D3d/0PUkm6PEv5fQ62ivsc
8Ir7NLuL70M++8snhZdwCpdso07hQnpTZ/hfFSsZ0sW+uMTjaevEbJ7u5tP1Ot0NGQg8ECBU
LYqiXVG0F1G0D6hioYpFcbEQjdFXQGPU7zB2dgQNdxP768eNdyfuoHixkWxBaVwH7mZzwrei
NnQAp3gUn/smPtdP0U0Jx30AebQp6EzNi2JaC1qg6cev1xrQXm0SblxNQP2abpSf1xrRz7Ug
+lAjFB1TtULiWQ42wR3JnKwrwdHsJ7PGtJuZcO5cnmZ1dT2rp30s3a3Mi5TsH2D3JV2CR9l5
Ytq+ye7jZzOcGdbR+2/2SzqBHk2HViTpztT0a8lIW0zTj5FnLND0a8fQnOvPISZ1L6PuOIk1
NSew9S79moBAfF4TqLM/1/RGOumIfagV0nL8AnRroLn+jcQZzqa53k0T7bVESqVATAy4iSKu
MuTWIPVvywlEeYYuT5eDuMxdR2sV8stN3GIpDGILDykCiB+g5jdlpegh/U1I+PbVi/tkPcLn
D3ltLGE5XVCb5NoIcg7xglwuG46NR0PpDAc3JfjNq7u2EZTmaDoSCaUJOnw4laZHV6zASRPh
cCgRiyRioVg6ghMNDNmd5ZXGcmReabTk30MLVsqxuABOxoo6Bd9jGugZm4Wz8DU6ZqoDq7De
cT0Hx+fg4/Pw8U+C1Sfn4Te9jCL1PIcEhzWXwcl+OZfPWLAgbTI7RuSZApzmprFjzVQSsVol
DDxTk0yx2lglw7mrz0ECUWcOEvBZ85CAdf4kEjBZ5yGBSrcMFRKp/9JEqX9rodQnsy2v1FGN
Hz6Rg5FIHUI4tur1u8Cy14iS8onDBYti0Xg0NWA8IFeJ+iKV2DSkb9/BwBYduEARFYizIi2j
UefAiU4kwJ3chiL3qkmRe92iyI1jW77Ina7xw6rIiSJHbQcCdE0aQffmS1nOWxEOZeIZnQEk
khgwOyEvdoGiYrdhSL+AgyKneSgS9Rmg9jMWOc6iwRGpeTH7lUkxe8OimClKddNixomDeLOt
EzfbWvL+BLCTheOxGcFofHpwTpC2CQbsJZMXu0lFxa5zSL9II/7XIqFab2TFqJEZal7MXjMp
ZoOqmFVSzGSE6i30I5CXzjrMrOOLm5kD5qfkxallmIuTTmZfXJw4Xj1fhWy1SCGEC8rcMmdm
ztu+pW/z1i1dkCXWhmtkLTI7cguaZjFR801N385ndSH5vUlNjIyqiZqdkomanZKJmgHDPfWJ
GnL0izWYqPm15UTNbywnan5rOVHzuuVEzRumZ93MnsnP1rEpG/lZ8pbfNJ0CGjBMAYWY9fxX
yRTQAEhnARLFGYD4VAbuCS/Nr5msK14zSYCentb6i6Z3nsF/Zmt76LXnaWRt5Ow8w/0fHPF8
/DGnHo/gP2tcM5byKZdm36tLSjWoXh6TlT73Ybd47sE68dw19eK5zR7x3Oc84rmDra9ii7nb
ofPwDiWBeLHjiJHj2ujAYedy4GdhN7nlvTfleaRt3Lkw8aY8QbX8kaak3yf8mxlQBVAVwGP5
ZkTrfwC0/ncUTUEJaDMzpvgObN5noWdwx+5f8XaSdhaap03I19iXMmb4zVoHekybhX6pzUQu
x0wUcZyF1jgm4Jb/ywUj1eUzwXPiPrI8fRZrcDzDOppeZipnsgbrSZo+mkw6o/PYdE8TlVI3
o81UUv2eRKbHNP2eRJZfMrZ4MijkYqztBKos4tDvSQmTHQySjXV+f23o/HLz/aak82vTfEOm
djq1weJBOrQlZ2rvNGFqR4CpvR/Ec06w/tkFAIXcgNndXZp5/WCdnKC4sx4whgJm0EEQP+gV
8U7A1E5YQlsocAXxWYkkjVTlqXg6EyZQQQkCFpKmmEDRZJwkI3SbsVQyzgnJCYRY4V8CNsT/
EoiSgeF6kFwdL0fm6qgxhnO9M1zH+pXE5XEs3ibibQpWC0IWPAtM9iRY/Bz8Oxdvi/F2Ht5W
4G015e40qqMZMrgLTNz4wGRNHei8c/7yiUggCk4BnXpOBNyABBFwEyt3/H7nILGafy6Y/FnM
4m1sAocTCq9AAq6Ec3RydfyNiTq+VZk6VjNMaDxuxi9OZ25dgDvcLXjHySQc5BcvqY5OE3V0
9ZuqOFRlM/VtQZ9iH6SYhBtQcQvibV7qdQiRwjj5O1DrG8rVa7GFehUPe+p/OVe3ExcwJ76r
g3J1o/x0vq5ep+FfrnpE5bi6Haa9qSZUHhe3k6kOZ+LyMQvIqXE5F3cTGw7mqnMaUJ3pQHVm
AdVJANU5B6jOXIPq/NZEdd4ePtUplyubHteEA0S/S6hODnBlI2dp7ut+TW5B+4Hq5IC6ZOvA
JBPgwR4EqnOQqg5pwpDSbuCTLqCVLtPsDAzFTeUq9KkyVMjIPu3CBdCJ0zrwncXCt4nMkp2O
i98MvEXxlsZXdeDfhVIVssMu7WIq1AZUaCxQIT7G04QEOV0z0gGtuArNACoUBSqUZs9sZ41R
rkILDSr0uokKvTN8KlQu+zM9Dhifs6CIIwP7s9VzyUDeoFPO5hz0AhZmH2BhBvH+BsDyDNif
c34yf0vQ28hi5tI0x5DCOBwn/jWJpJzIOJVJxG38DBzLh8tVclsZKmlkSvagM3GR5UzJPJzL
Oh1LcDFfjrcL8XYZ3rrwtoXOPxtV0g4Tsoep5JmgESljQm5COhNyA1PJJex+Lcz7icM7Xcji
RCUvAyrZhQTs0xbDHPgbJir57vCo5PHgFiFzl6uWWLWFvjTy8jhn8EDREXnh9ZRReO07Suh/
5YSoggupCaRvBv463IWNvzXOf9SGBClLOxKkLGOQIEDlBW3QpKD9XhW0GhW0aFFBi56IBe13
JgXtvdFf0GrFhEvb5g6Al+8kzLZTWW+hLxOKRxKJUCwSJZY8HiegteFQMppOxkOpWHTAdkp5
wQwOQcE046itQxMoJ62xYHIkRU49xT35OXoj56RtQ4KTth0J7lryOwEVcsy+aVIw/+XErQFr
wRnbkqfbWLAoGhf/BkyOywtd0xDWhnKOV+va0MEKHedG5e1J7u3NuVHbkeBGHYMEN6rcW2gu
9RZKoXm0/cmdWPQupPBZX56PzWfXtqIF+WHWhfR3LrtXuob3ytTwXmfX5F6tOR27QADXzLUB
XONBxbCVlXzDxiFhrR1qfSycqmujPZreujt8u/yzA076XurRDC2K7qcthKn0zRGu4w3UOUyf
W3uAupBzy06uudXDv6EbVOjElvVm+RAIOddO36qWr2ajVIfi7C6EfzQB4kkQT4H4Qcq3zAf5
4dWykChxPlnifKrE+btpCXFJpiLG5M+QMuNndUmA+ivONi0BHzDY0Oas2PfQsakWRqk0EU0S
d8hN8L9LwEEHnz/wU3blB88W3ok8/5BL1yJyh8noFGzGZTKszhbs9q8D+/od2ugdTsXaexp6
JD//aRVEqsaClTdmqazCk7lGVIg88TU67OUqQ8Mes/Uke/f1lXVfkvrJbGEeNNvP0sp6lv37
NpR13wZJHhy2n+Uo61n279tY1n0bDXnQRkFZ0kZBWdJGQVlyjIKy5BgFZckxYsvStNwu1j0t
bA288f2/3rkqvq6DNHo99SLX+vsP07HjwmvErwM8t0DmfOsm7+X88Q6aYibS+e5JOKrFKTe8
vn9UO6olwP4tzqNaEuwvch/VUnT/Vtr+MQaSk9uYPJ9nv3vZ7zSW+4mm7RI99xdb5H5qtvh7
OYpKauncy6UnkpSSftKIln4yMrYiPzPhve/cuOySDtEKNJN+0NgCfVYDNBb2pEem0hNJSkl/
imWL9pCrvHdfS+ntvPvgiJb+VCTvPfTbKDlLTMs9ql56Kkkp6afU9N2Xr7XVvfvTRqj043Lc
s4ivT55C7aAPtE1Oo6MXvqI2y6miPxkQZ4K5yfT8Htf/eB/w72w76Ar6dvlXtumjHHNxyg/Q
r/PjECQH+n2aEc8WoqM+Oy3XRt/CciBvB/Cnya4MZnUJveiv6mY0+j2dgWfqljf+S/3swCN1
6UbNszLgwF+nUMIzcvtp+0BDcepUqbtW6gme+lgq4ODcnx7t4OMCjXTOxyp46cjnDO1+uir8
qEbz5IFni6ljpufz/bfoSfYRWgxNKv4+XfLyZAz1BYmcFg0mjZ03Xl2PxIotLxJoPsZ1jWdk
w3nxI/lYNR8dSQYWiz/6JZ4fNf7U2xm4wfOvjY97Zweu8Pys8Yde84/ux/uJoo/+4V+kAvZ/
7+nfUtP75q5bni386AcPPpzf4Gd1so+uVfHRWy0+ulbJR3eOso8+yXek8e6GzsBc3zuNVzfM
Dkz3vdh4a4P5R2/C+8mijx75H6mAubG/ek1vb32wyPDRc7lcfoOf1VWDj95W64/uGmUf/Y2G
a/wr/J0BZ+N9/ln+2YF/a7jev9hv/tEDeD9V9NF7/iT/6GzYt3/vz35m+OivvPJKfoOf1V2D
j95e64/uHlUf3YFeql/pndy43Pcf9Tu9f2qY4fN59nvfbGjH4kWdhR99SsHoAMq3Z5oLntIO
pJ9F5dv7sZ6zvTjVNfSOcXb+rFwrvZ58iBbBuIVz0yKbH5tJv6aWb+rp+Hm6h0Ej+8gbKJX7
BnRW1tarC8pfHbkneQ3Wry7pDbYd9vnaL/YuaLvH925br3dN2y7fS221e3XjXfqrG4//yF5d
C311dQWvjkwJXrRyc9+WovfVWP37Qubvi+Td+n295trb8BP32U0fuZ5oeNQ9tmms+7mGO90f
4UZnWKvmfd3i5O9rIitqZ5gUtVb6vhoQ5Wdn74t85MWwkI2ngjiLXlodfdBQvDr9zlav7gdN
jY23Bb7vf7Mp3LgucMD/p6ZPNi4N5PzVFrU7fPzVfQ/pr44A8MpeXRt9dfUFRY3UbasjrKyZ
vzbykEpfmyto9drusCxxHtylGhfQu1SzA3qXivySLpXRouldNm/B/XVnWgcd3JySn0bnxqTa
7haRxFr6m9z/4/2bus7Ao+6gbwdOT7po5NdRpvSTayw9l8RK+ia0rG5c4H4sfS+VfHbg4rqp
gdvrVuJ373AUSi8M35epEwup/M9jw8v1Fp0wjw1DB49Xq6ZmoRZ5bmV59p9AeeYrDZtOoDy3
szwHRkyex2Vz1G1pr3ajjgg8b8va9VcF13ZvCF64aXNfF25s88VAN6FgnWjtlhLZLMBRLdL5
J31B0jXo7Oyk++T3vffeyw8MjJQ0ozGo76OCCiqUE97Pcd/Df0dZpzA/1C9SvR4VVCgr/Dtq
dhX6BX48Cq2zSqPSqDT20wjb6gC2Vb0plUalqUSLnEqLVBqVpkotcql+ngoqVNjP41rkVlqk
ggpValGd0iIVVKhSi+qVFqmgQkXh/Wwue3PeHUMg6zxEvYPFiP7DeXRi4eKlLyXyFpzlCDD8
LMU7ZqgzboA6M69M1BnqzPL3f/6BHe+N0RgKUWfcRagzQfrmgkOAOkPwezjqzHokcF02gHgX
iG9EZqgz8GpZ2GA4PwYJT56PDU+Rnd9Y4nwh6owD/ArUGbKKmqxFJk5WZF1sZagzp9I7z0Qh
NAugzuTm99M1J9f+5V125SBb8/vHItSZKfQOYRTBb74y1JnT6B1iuAQkFOqMQp2hQaHOHPuy
pFBnFOpMrcqSQp059qgzM4taA0ODOsNbNyjfupGhzqw3oM5sMKDOdBlQZzZWiToTMm2X1Ba3
xSr3lSNAzBrR0oeRsRVZPuoMv3bQAnXGTHpkKv0fbaDORCxbtLXDbSlfejvvPjqipY8hee+h
1qgzZUtvC3UmXtN3X77WVvfuEyNUeh11hsJ/s/S1RZ3ZzVBnLhxW1JkLbaLOzGGoM2sZ6swS
S9SZiXh/vV3UGfT0Pb/r4OMCxagzEHxEH2+rDerMGEOTakhRZ9ySq49/1JnVfh115nq/jjrT
5bdCnZmE9zfYRZ3hg0G5B+80Qg0NJerMWIuPXjHqjHGcbSR/9Ek+t19HnZnu11FnWvxWqDOT
8X6XXdSZ/uz3f0I0/eDFh1/tGD7UmZNq/dFdo+yjv9EwiaHOzGWoM9MtUWdOwfsbbaPOBHY9
ShvZT0z8Rcfwoc6Mq/VHd4+qj66jzkxlqDOoUUedeW9YUWeCFqgz844l6sx7JVFnTm877Gtu
v9i7tO0e3/ttvd51bbt8r9QQdeYUhjpzignqzKnDjTpj8b7WlUSdecW1t+E599lNf3Q90XDQ
Pbap2f1cw96aos6MZUVtiklRmzKSUWe+wVBnbmeoM73Dijpz2shFndnNUGcurBh1ZmaNcVsu
rBJ1JpIrR/rwCEOdIeZ1D5uEPlHQSMayPE86gfJ8Esvz5BMoz+NYnk9BCnXGJCjUmZET1PdR
QQUVygkKdUYFFWoXFOqMSqPSqDQKdUalUWkU6oxKo9Io1BkVVBht/TyFOqOCCrXSIoU6o4IK
1WqRQp1RQYXKwnCiztQD1Jn5JVBniPeFEXXm/KvGn6tQZwjqTD1DnfkARdFO/G7caCJ9c+HK
UWdQdxYhGeoMcRMai86lbf57kE5a9Rd8p3uR7t5O4vchnayMxN9jTyLxQ6w0/IUi0DzG9siT
4Z2cqNCX/WPD3WUrW+ATnUxKeB5KIbseSiZ7/t20RLtZKr6+huvDmPxZ4sxE1g6T9cuL8TYP
2UOqac+KfX1leoTeuQNl0Vxxh+zDb/yMEuV+vO29kkg1UXqHeWg+WlAhUk2M3mEhWoTzopBq
FFINQgqpRiHV1KYsKaQahVRTq7I00pFqOopaAydtOTJ2y5GNVSPVFKz/y7eCUL4VVIxUs0m7
ByDRbNI2afeC/Zcdm7T7wH7atUl7D+wfdG/SDlkg15CclcJhyJq2U2qL/WL1NipHkZg7oqWf
h4ytyqFBrjGTHqFqkGvmW7Zwa4f9Ur70dt79ghEt/UIk703UGrmmbOltIdcsqum7L19rq3v3
i0eo9DpyDTFvLSx9rZBrOihyzVtt6ylyzbPDilzzrC3kmtvrpjQere8MfKNuUeMD9bMD99eF
Gg/Xm0MbzMD79xRBGzxnMvr1wO63Ovg4gV3kmg9wrjdQm18ptMHJhibWkCLX1EuuPt7xLP6j
/lP+M72dgbGeHn+dd3bgo/oL/ZMtkGtm4v17iz76mo/kEq77u6MUxOQX8f9jG7lG/+haFR99
vMVHrzlyzUj86Ed9qxr/1NAZeNe3q/EXDbMDL/nWNf5fC+SaxXj/vaKPfsefpQLm1n5Gb3fd
9sQ7tpFrCj+6VsFHP73WH901yjT9Yu8j/nt8nYHPef/Z3+2bHdjo/Zb/Np/5R5+F9+8r+uh/
kMMV5e6b/22KUfWtr/zANnJN9Zo+sdYf3T3KNP3Mxj/41/k7A8saxzWd658dSDaiplUWcEXz
8P6hoo8+VQ5XxMf+UZ/j9mcLPzrxdOQb/Kx1Nfjok2r90etGlaYfD3BFYQu4ovnHN1zRPW2H
fXvaL/YebrvHd1F7r/eltl2+bHvtXt0dDK7oDhO4oshwwxVZAB68NALgiqLHEK4oWC1c0W0M
rmgdgytaOqxwRbGRCFfUQeGKSD+agAM9WzFcUUeNAX+etQVXtJvBFT1YBFdUnvTzRhhcEemH
P450b4QTBcZmPMvzzBMozxNZnmedQHmexPI87wTK8+ksz4uRgmgyCQqiaeQE9X1UUEGFcoKC
aFJBhdoFBdGk0qg0Ko2CaFJpVBoF0aTSqDQKokkFFUZbP09BNKmgQq20SEE0qaBCtVqkIJpU
UKGyMJwQTV4A0bSgBEQTv7aUt0bFXh7VOogPcyiEaPIyiKYZWhTdj7PiQmPpm8tWDtHU35sV
rwBCNE1HBKIpSnvOb7O7kCX574D4CyD+IogfRHtZeSCfFV5NwnRUuFjjnRLnXzCcNy72eLHE
+bupA7YLlGvBcs3PECgqsgKKLEAmy3jtwC01Z8W+Dq8wV4cUQxegFeAOP+t5kCy56Lwsf2Ux
3BJf3DyP3mEl+ixaVSHc0nx6hwvRRWh12XBLSMEtKbilMp6l4JbslyUFt6TglmpVlhTc0rGH
Wzq/qDXwxvf/eueq+Lqq4ZYKZM63blC+dVMMt3RUewHAJx3Vjmovgv1bnEe1t8H+IvdR7R0L
eCWSk1JgIReYtktqC1BklfvKoU5WjGjpVyJjK3Jo4JXMpEeoGnilz1q2aGsHUFS+9Hbe/aoR
Lf2FSN57qDW8UtnS24JXuqim7758ra3u3a8eodLr8EpkKIQjJNUKXmmOk8ArfbttrZPAK901
rPBKd9mCV5rku6bx7obOwFzffY1XN8wOTPdd33irBejKQrz/dhEUQ8QEf2NZ9tdE73J/Pvtt
CbyScV2IDq80Q7ufwisdrRh0ZaqhSTWk8EreKkbajhX+xhsNZ/tX+DsDzsbL/LP8swP/1rDI
v9gCf2MR3n+n6KP3yPE3UP/111N4pe7Wn9uGV9I/ulbFR59m8dErhlcaTR/9r+q+1OD3dAae
qXu64V/qZwceqTvYoHnMP/q5eP+Foo/+lHzsOffQ2+938BFAu/BKhR+9EtCVYK0/uj5kKkfa
GYkf/RLP7xt/6u0M3OBp8D/unR24wvNh4w8tgNQ68P6LRR/9w7/IJWTDvsF/fufXtuGVqv/o
p9b6o7tH1Uc/HpB2shZIOwuOb6SdNW2HfYvaL/bm2u7xTWnv9R5o2+Xz1RBpZxVD2lllgrQz
9zhC2jlQEmnnNdfehp+4z276yPVEw6PusU1j3c813FlTpJ2JrKidYVLU5o1kpJ1vMKSd2xnS
Tu+wIu3MH4lIO3OcBGmHdKkIrs1dFSPtnI+KX2u13a3SSDs3MaSdR6tE2llZY+mHGmmHNNTe
YpPQJwoayakszx0nUJ6nsjwvPIHyPI3leRFSqDMmQaHOjJygvo8KKqhQTlCoMyqoULugUGdU
GpVGpVGoMyqNSqNQZ1QalUahzqigwmjr5ynUGRVUqJUWKdQZFVSoVosU6owKKlQWhgd1JpHT
j3lp6k+vva5ne18wIgGbIU4XWSScNMjDZ86feK4dp43RGJK0ieCjDilP0TcKASTIlmKAME76
1vRzbhCvB3EviOuLyHxI+OLUZhFZA/JoHu2/vZ/yzdBmaAPeT/gWaAu0Z7wBH5G9lKOo8D7W
vZaWe7/u1Z1DndRvCKHXpYAotnyPNLnvEZdQdiX3t2pAH3g92vutq33tOF8/bk34ZuCrDrVO
qjBXT7JcuYcsV1xC61x5tNcb5/j2j52hOfwn+7aMXaCN92u+lWMrydVd3pN8eq7qhyxXXMJS
3+r1xkD72rHtPof/39rmjJ3hG+//edu0ynLle4d9K++Q5YpLKM/VuOwNeaikEn5wyvvNKs1o
DOr7qKCCCmW1+ZX3mwoq1HAkSnm/qTQqjUqjvN9UGpVGeb+pNCqN8n5TQYXR1c9T3m8qqFAr
LVLebyqoUK0WKe83FVSoLBDvN+Hzlsim835qxK9peW/PlV3r+4Kbuzf2mHqrwd8TPegwffxd
CBTqs7JX52m9BGbqnx/6fy2/0LqpN83CnVu7ejdf3dXdF1xAaOh6KCZiJD4rHJ8VDUfDqJtC
bYJkSxbgRHS+pZv68Czr6eta19NzVcEJj/iK4qC/4EZdveKMV0/e17O+Z4s4Sn/Y3u0UMYxN
8xCgtI4XX3jhXNm7EMUqnXXmsqgQrrWSoGX/PwAAAP//AwDQQkUi</Template></GraphPadPrismFile>
