# Supplementary material for: Regulation of stem/progenitor cell maintenance by BMP5 in prostate homeostasis and cancer initiation
Source: eLife journal article supplement (doi:10.7554/elife.54542), 2020-09-07
Supplement: fig3-figsupp1-data1 [file elife-54542-fig3-figsupp1-data1-v2.pzfx]

<?xml version="1.0" encoding="UTF-8"?>
<GraphPadPrismFile xmlns="http://graphpad.com/prism/Prism.htm" PrismXMLVersion="5.00">
<Created>
<OriginalVersion CreatedByProgram="GraphPad Prism" CreatedByVersion="6.0.1.298" RegisteredTo="      " Login="Admin" DateTime="2020-07-16T14:20:27-05:00"/>
</Created>
<InfoSequence>
<Ref ID="Info0" Selected="1"/>
</InfoSequence>
<Info ID="Info0">
<Title>Project info 1</Title>
<Notes>
</Notes>
<Constant><Name>Experiment Date</Name><Value>2020-04-07</Value></Constant>
<Constant><Name>Experiment ID</Name><Value/></Constant>
<Constant><Name>Notebook ID</Name><Value/></Constant>
<Constant><Name>Project</Name><Value/></Constant>
<Constant><Name>Experimenter</Name><Value/></Constant>
<Constant><Name>Protocol</Name><Value/></Constant>
</Info>

<TableSequence Selected="1">

<Ref ID="Table11" Selected="1"/>
</TableSequence>
<Table ID="Table11" XFormat="none" TableType="OneWay" EVFormat="AsteriskAfterNumber">
<Title>Gata3 expression (Fig3S1B)</Title>
<YColumn Width="180" Decimals="4" Subcolumns="1">
<Title>Wild type_basal</Title>
<Subcolumn>
<d>0.9</d>
<d>1.23</d>
<d>0.98</d>
<d>1.05</d>
<d>1.02</d>
<d>0.92</d>
</Subcolumn>
</YColumn>
<YColumn Width="180" Decimals="4" Subcolumns="1">
<Title>Bmp5SE/SE_basal</Title>
<Subcolumn>
<d>1</d>
<d>1.69</d>
<d>0.96</d>
<d>0.84</d>
<d>2.11</d>
<d>1.43</d>
</Subcolumn>
</YColumn>
<YColumn Width="180" Decimals="4" Subcolumns="1">
<Title>Wild type_luminal</Title>
<Subcolumn>
<d>3.69</d>
<d>3.59</d>
<d>3.59</d>
<d>3.95</d>
<d>4.52</d>
<d>2.9</d>
</Subcolumn>
</YColumn>
<YColumn Width="180" Decimals="4" Subcolumns="1">
<Title>Bmp5SE/SE_luminal</Title>
<Subcolumn>
<d>2.45</d>
<d>3.75</d>
<d>2.56</d>
<d>3.04</d>
<d>3.04</d>
<d>3.63</d>
</Subcolumn>
</YColumn>
<YColumn Width="180" Decimals="4" Subcolumns="1">
<Title>Wild type_stromal</Title>
<Subcolumn>
<d>0.46</d>
<d>0.62</d>
<d>1</d>
<d>0.69</d>
<d>0.64</d>
<d>0.66</d>
</Subcolumn>
</YColumn>
<YColumn Width="180" Decimals="4" Subcolumns="1">
<Title>Bmp5SE/SE_stromal</Title>
<Subcolumn>
<d>0.39</d>
<d>0.32</d>
<d>0.51</d>
<d>0.4</d>
<d>0.94</d>
<d>0.13</d>
</Subcolumn>
</YColumn>
</Table>

<!--Analyses, graphs and layouts as compressed binary. Don't edit this part of the file.-->

<Template xmlns:dt="urn:schemas-microsoft-com:datatypes" dt:dt="bin.base64">eNrsXQt8VMW5n7O72fcjCVEReZxgwjOE3U1CEg2yPAWqNOXho+1PsiQLrCa7cbPh5WtVqqiI
qddWqlVR0VoEG5VSar3KterFglzsBatWq1fxShWu1muvWlHuzJw558xsztlHkkU2nQ9OzvnP
mTPzzTfnzMx/vjlnG6fPmnXu/KnVQsIJAOgSugQD/NsCLjLcD8pgyGcCYOQig7RHwXcNBgBB
Q6JxNAAz4FEB3EJkj650wL0Zbia4HYciX2kkexk7ABcuXLhw4cIl3wX1+Ra4WbkpuHDhwoUL
l7wVEzcBFy5cuHDhwoULFy5cuHDhwoULFy5cuHDh0i9iBNPg3yODANh9OgDzjQCcl9U0PFpv
d6sggAJppZ0J3HGSFtScQIsIi4AFF1iSqbFwsDVFgdHSRDeFu6TVhEaDMJKkgwIMYMHqtiXR
Vn3/xWi4DdJMp5ikgxc4ggvDkWUtcOtIoc9QzXQMJB0jDlgYbgt1iPNCK8X50bZgpEc6Z8LN
lVIfqSgXhGItwUgQ6KWDylWY0j5oieYNIPC7Lfuef3X/nn1AO50y3XTkcplxOiiZPfv2vg9S
pONMmY5FSQer02t9pCUn06OdsXAohiwN9NLRrncfSccm1VcstKSzeXkoLp6/AGikUw43T0o7
23G5sG1SpCOmLZe0RDYwLRgPRpaB7NOR7x+nVO/4ARMXRcLN0ZYQSoyV8WmfL5d6/0iF00wn
fb27pXT2PbD76CsvPPWGTjrj0trZg9M5r7M53BIUz40FIy0h0DOdZOmiljdL6RRS7Ya4MLws
FAMa6Yi4xdK2szlwFX5K0fLoq5WjO5TFUKhhlpDAIAODjAySF1Dfgo8ScPsJOGCR7goU3ntt
uXDhwoULFy7ftqCO+W6FrrwIVhhk5sCFy4kUQ6Ae83IzZEKVcL8o0h4Mx0ItYlyMhzriYnSp
eC7kIlViaFV7LNTREY5GxDGzwsuqFvimjYWsZ6jATlrg1/8M6muA/+yj07Mw0ygCxzGD/opY
aCcYTJhAsiALna2wBjTubwAVhF86ydXpZDIYglNHMxXfQIy2YeQYySYwW5nxAEysbzRSk6+U
ay35/IeKfkCZj5FaMxOZf6BfE0F8ewrOU85fmrYqUe4edFUAW21hcElnazAmwvuuszXeQV2n
iFVlVwZ8HU5NO6Ih04jGTCOaMo1YkGlEc6YRLZlGtGYa0dYz4iwwA2puhievcPGmkguXgTQA
Pd6Pshi2hYszSBNG2VX15cfnnqx7eZ5wMem+FquTedf0ZfuZMth/GJQA9asIVrKhs78AnVSz
bCbdLprwbBRXBFs7Q+IYaVA2ts/Vv/nxxROf3P77KQBnAjxq1kJS1nExFoyHo6Dfsj449Mb7
uh77gmQtUFkbkrKeL3Zc3hmEY1HQT1nPP/LRK3vv2k2yNlBZG5OynhFeujQUC0WaQ+KSUHxl
KBQR20LBSEevs164aNGvJ/70AMnaSGVtSsr6vOjKUExsjkaWhluwAq3htnAc9D7rS4K3vv72
d557VsraRGVdkJT1ovb2/s1667adj44e+1dS6gIqa3NS1rPIbdZvWb9dOHbko82+gJS1mcra
ovdwzSK3WV+z/jq44q1LPrqSlNri+SUeINPfRkEiZ023yLJkdoUh6yuMWV/BteJaca24Vlwr
rhXXimvFteJa/bNoVU9cI5Ycukb6xemXTDjyzjVi6bNrxJWla2Q45fQYoesaGZ7GNTKCcY30
1IC7RrhrhAsXLtw1wl0j/eYaseTSNTKkecxd7817XMc1Ysmla+SePZ3vbWgBAW3XiCWXrpGv
E1d8IRz9o45rxJJL1wiUxLwzDj2r7Rqx5NI1sm3iDUdGHftMxzViyaVrZNPfX+hynbFVxzVi
yaVr5JoXH437p38yRds1Ysmla+Rogev5NzZ8zF0jXCuuFdeKa8W14lpxrbhWXCuuVR66Rqwn
u2skmXDknWvE2mfXiDtL14hIOT1KdV0jYhrXSCl3jXDXCHeNcOHCXSPcNXKiXCPWXLpGLigb
enXDB0/ruEasuXSNlL91qOuel7/SeWvEmkvXyOezX3r9pV+9rOMasebSNbJly5YPH2x/Wcc1
Ys2la+Stxz8YMWjvOzquEWsuXSOBQ7cvtN3breMasebSNeI7+MWG6F8MAW3XiDWXrpEt7bP3
l2/4E3eNcK24VlwrrhXXimvFteJaca24VnnlGrEmJEpsA2gSvDEWvTTUHBfDkaVR0QcZiuQe
gXypIx6MxDuIN+SwUdpk2ZxED/rFG5LMMfJk2skBvKRO5K9gOYlF5lDb9/h20m6AMOg5GrWL
WPUY8qSK91uYB60Tb4JmGP2AC/Rje40B4w3YRyVfKU8lOpNy/wDnv5zoKaEwgy5l0GUMamVQ
G4MiDIoyqJ1BlzMoxqAOBsUZ1MmgFQxayaBVDFrNoDUMuoJBVzLoKgZdzaBrGJRg0LUMuo5B
1zNoLYN+xKAbGHQjg9Yx6CYG3cygWxi0nkG3MmgDg25jUBeDfsyg2xn0Lwy6g0E/YdBPGXQn
gzYy6GcMuotBdzPo5wy6h0H3Mug+Bm1i0P0MeoBBDzJoM4MeYtDDDPoFgx5h0C8ZtIVBjzJo
K4O2MegxBv2KQd0MepxBTzDoSQZtZ9CvGbSDQb9h0E4G/ZZBTzHodwx6mkH/yqBnGPQsg3Yx
6N8Y9ByDfs+g5xn0AoNeZNC/M2g3g15i0B8YtIdBexn0MoP2Meg/GLSfQa8w6I8M+k8GHWDQ
QQa9yqA/Meg1Br3OoDcY9GcGvcmgtxj0Fwa9zaB3GPRfDHqXQe8x6BCD3mfQfzPoAwYdZtBf
GfQhgz5i0BEGHWXQ/zDoYwZ9wqC/MehTBv0vgz5j0N8Z9H8M+pxBXzDoSwb9g0FfMegYg75m
0DcMOk6QE6/RkUUem6KRR+Aa9JryYGo8j0YpKHSuTCsSDfTqFnIdOg5RqyxMZPwrgJ5rgWx4
PcZ0wi1AIfaYSHIbzppepIISkH9KpYskdbvicdwBziMeF5r1CGTvAurHYx0k3dFkkIdSqCRK
ImfRWSQPT0AqoDFNAa0pC4g0ugC5XjIonZ1ooFW6wiRuaMca3kRiqp5XK+FzDpj3GXCf1bo2
LAkyCs2geMkmG2g8oCeTs5NqKyfbdp2Ns6iTYysjD/n3MmByBuquDgtOMMzg0gxLZnI02zMz
TE6gnP520uTImG15ZX17trxD5ZY3LjVTAMhnUegw6uwi4u91Kesuh1Nn5ebLpTQ9I3TPouZA
1D2LnvhSjbNSc0n/3hgKdVDNpbzuwk5ZTmCaS9TMXRhubRHjq9tDi5cEO4KtKRpO+nqP0nAa
laZ7WJ91mdbWXrNg5sQFM/usy/AsdTEwuhQzdmntbAtHMtamSNFGULQZ0WdtVMv0VhuDoo3Y
j7bpiMeibX2yTWk/2qa32hiUzl3Q6NydMJ9zQJbr2M9KXmmsPZNLFz1daQd676E/k3uEbDfx
PnbA9P+C0rui+RAXsApuzbDk/n9k0pJTqf8fSeYZ5FhOqkWRZnYz6//PpJgX29PS+ZpJDkvJ
FQaijDNJx9PJZpNKVgj8ghwskMsBaJqTvIq2QSL5cwQSN1EQmC2HdwmgR3w0tVxoaMfxp2P+
WIiP0XTtbmEdPrbAP2OEkrkCmS5ZZTyMw2tQ+kXvzE5OE008bTTtx3HQRNrygl3K8RizdIzi
HDZLcdBU2E7LbnyMKWuR2ENPNNW03/oajnMR8n4NCig6F5aoOjfaVZ1bC0rmFoG18Cgh4Nc3
WkPiVNj/rV4TapkehZ1hRJy2oqOSHE5NbqNFeSmectDR2dYWjK0WxQXhZZHw0nAz5MKtq8UW
sjwzPkUc0yg2iN5Kb81YUfxuJDRBjMbE+MrohHgw3ApTJglNEcV4hdiydHZ0pbgkvEwMd4jx
5SElnWYU4fxQMCI+Li6Yeb7k1ZN01AmfJop6a0RFsb6mnF5FGY7EQzGohijKK1qllYZiPAqj
tbXDAKhlLByEkeHVsypmzIpUiDOWtvTRIAd5TZwkNaEOa0ZSg6UEaUHVOY3lpA2Rf8rVDRvi
U+F1p5OfIi2Fw2cvbKDq4XBoLiTZUTiMX48bceSeGAK2wXxegNtb8PhzeFWhIL2WNUQ4A9RA
ijZVsIG5QhH4gVCOJrlh/qdQT72bNI5u0gEgfU8F6qtcp5NwMxkIekgH4gXSy0PoXD0ZqtlI
y1JOBghRQjkcxFVjIR0HcqoMIXmiSf/BJN0XyHEhmWwdQtL9nOiBhpKFgpR2CS4hwHM6qDw1
pHFHuk8VJF1OQ/oIUhoo3R8I5KeAycD2TKqzoDuMkdS69Cw7DIn+JTQ7ACC0Kx3GLovUYaBw
EXYMer5zgUzGieZdOD4ywS4XUI4DbukYmb3bKOL00esLjabGlGmicVqXYSOOjzx6Y4xdc2R9
2i3tSkPvNUkNPdLhneJds1Olifrr/TavEh+couqcGC/piW/0isDsIuxheVJjQi6JYcL2Kon/
eit9NdXeSMe86EKloYlP9lXWVFfBJmayz+ur9PpqYZMBn8LquklV4rzJk3yVVVV1OMjv9deh
EG9llZ/E8nvraibAVKv99ahN8FbWwqsgrvfDGJVV9RViDfwPU/PW+saNuzjUcTCflddulp4E
+s1SIfnrgSzZCK9S15344GNTC6+oh9vZ8LGcSf0q+nwwCLLEYrASxr8BPoJ3UozvHtgkPALx
Y/C6bpjmDuxpoX9HrpA8goWkaZDnZ+RmaSTVFPmoVwtqyXU20izJM01nkz1qimaSZsiNtZR+
YdxDOG0xyXMlCSsinusicu5OktcpxB/rIE3OIyT8NOK5NJAmp5vonGpq2nUi2OsAsGFfW6L0
7PU6zhAHDHulZTT2twspw2ReWqbJXssIe6U9Pb1hr+W67JXOVx4oLSVXJLPXMs5eTyB7naFy
pul5wJmm64TPyH/2ymviW2CvZZy9npTstZzYwJTUYZRpsNeyvrHXK/AyiHVKhxGwSh0GChdh
B5COvW6i2aubYq8elb1+QrHXrjTsFY3Tug1dCnsNEPaK9N9vTKgNPcVemwalHzMW2tUxY4Jm
rxWqzmACgOz1KbJiUJ8AEi8gQwFJGHzAJtVOSiaBfsj46iUSWFVZ6yX0zldTjxhfVaW3lnBA
X20tCoGkb5K/rgqHVXknTZoAaaLPL3FAb011XT2MWl9Ti/jkJJkE1tdN8qNsD+a5/tqN044M
OGwRbAaM8Cr1l8xrYONwNrxiMtymwIdzDsVhL4A1vhxua+CVN8Nr7qY47P2wYdgK8RPwuu1w
S81hi4i+pVTjVEbCLWSYJPOvsyn+NZniX1Mo/jWH4l8XkHw9ZCW8zL/WUHnfTPGvuyn+dT/F
v7ZS/OsJin9tJ8epOKz7BHLYfLZhX9uj9By2i/PEAeeB9WBvqwdYhULNsGQOO0qTw47qJw/s
aF0OOyqpLG4yJBmtwWFHcQ57AjnsLJU5zcwD5jRTJ3xW/nNYXhPfAocdxTnsSclhR1MeWLrD
GKXBYUcNLA7bhTnspjmyN7bRuFHhsIcJh0XcdrmpS/V7ZDBmbKTGjOBUisNOoDhsJeKwz5Du
SZ8DktWaDAckYd5Kn89f39ORWVtVJ3FASO9qCb3z1vr9fslvWV1Nwnw+bz2hgf4qr1cKq/JX
Q1zjrya+TO+k6nofiuCr91dW1SjOzKpJdT6Jx+Z/GbQbqadywGVLwKVgELgKXnkrvAvuo7js
Q7CB6IZ4B7xu57fOZUtIY3Qp8SsWkneX5bxvJboVk/deZR72EMXDuiketoPiYTtTctnihPSG
Vi9fFbJSLz/ku4H62ugMwv1TzLzevsbV4DFhuxRA+uEHLfAqM7SD04Q0NkBcAP9JfP9eUE1s
JC+vniN1wUoMVcIBQF6+QOdKmM9nn4qbYzN++eI4+cT1MOp4OHU8gjoWqeNS6ngTJk7yNwzp
VLU+nj0szfnhac6PSHNeTHO+NM35H+MSmMndaaReZpP3pygxnNS956HusdMw09IW6bep4P0U
ULHVIi3ol2ajy2Fj1yMFcebfCgNsUAmFu/GTVoxTGA1p8lhNHS5mU9i1pEcKg3AK48B4UAGf
CBFof5Kdlv6MtS3hBJl81SaVPJJRTpmla88qXRR7W4Atg5BxXkJWeWWeriOrdB0aZTBknJch
q7wyT9eZVbrOpDIIA+BeEgbAvSQMgHvJMADuJcMAuJcMeXsvlSfWUD5ndTTw3TMOb7923mVT
0CjbalFLLdnfiz/HxF6j7g1UvmbmtTx5tASU0c5KXKoJeJwg3UcVwlD8KrCEK4QKYRiFLzJU
CMMpvNZYIYygcLepQhAp/GZBhVCK8Y9AiYYVUElvIPreSPbrgPQTG+XEOuW64xbJOt9PYZ2y
QM/6NPS4k9NbR1t7pEk67UfltfajQfIoswjL5VPUUWK6O5NuDwTth0FXe6CrPdJEW3ugaD8m
5Yi325Sd7WXthX7QXt/2qvZj81r7cUCbXezK4M6Zo3vf98OdgzVJp/34frV99k9t32xfkafa
D8Y9uonwaIAX3jupEQ7an4nnauw9xjSlQHHuUl/7FBPD8fk9pmO2e12XF39sEu1rXOcXS7Mt
Uz3oA01/VuZDpBmBQszdSbFwb18CVjEO32RZS0qgPU6Qc9O6UgxIGtpAwmx1d1maPJvNFe5W
S4NnvbnEvday0CPA2mE1HJPowuMHAQwlI2lBcRnvSz36fKe04tMpVlAATCmj2aDFDGA3aMEz
UBUCnjuyqta247kkVsYqaf4c+0k8tBUMqvtbXocnaKSRJAXMTWdKMaAqIOeTwwoon72N3Cj2
HrcP7CgCXuV6n3LUl0oHKQaLaqVvtTS5nrY2efZb1ro2Whs8Oy2trm6rfqW7IB7Wo9If+CZ1
pTf88GtY6QJloU2bNisbXenGnFe6kH2lG1Owi3ys9NesouOwrclzzDrD8bytwXPIWuF406Zf
6ehTAsN7VPqKr1OaEc8QWmFs1UKJRELZ6Eo35bzSDdlXuikFHcvHSjfZdzhKHE2eMfY3HJ/Y
GzyF9uccVod+pXsgHtGj0uceS2nGQNchJ6x0I2WhAwcOKBtd6QU5r3Rj9pWu1yMY87TSvY7v
uAPOJs9CR9Q91NngaXBc6K526lc6WrIm9qj04V+lNGOi7JKPYPNuoizU1NSkbHSlm3Ne6abs
K92sE9OUp5X+Q2eru9XV5Ek4u9yzXQ2e5c5V7iaXfqUjR09pj0r/9MvUduywfwAr3Z6iT5fs
YweWnFe6PftKt6SYncy/SjeA7eaFtjpXo/018ypbiavC/om5y3bMWQLV8wpspY8EyR9mpxiH
kksJpf1EaTn0calk62Csy3GK1eT8+EQxaTsEtAppl5xGBV6TpO+an0B+aVFmd9LqKsk37SS1
3QIfz8vg3/GBjGwoatsQL+KB9khtw4etw4tnOayD/mCdVjzScaj4Xev3i+2OvcX9Z8PBRsmG
g43oU/Q9bViEbWhmbIiap4sWhuOtoWR7OftsL1MKe6Gyp7ZXoKDM6TXf62opmO10mte4rixo
cn5WsMTVV3utNcr2up7cc7fp3HPFOva6mNhrCDUQoO1lxnnkwmpSyqms9ozb6bzL87TrXbfX
ucKz0fUP92znJZ4EtJrf2BerrbfLVnsKSFZDC5O0rDYIW83CWA21hxf70poNZZIbs623pzKb
FewxDfZIEygNHmkCBe3RBEpyryZN0NgYmmbDE4IG7Oroada+Tq4gTVJrf7jgmO1uc5PHaRbt
K2F8NCGD9oYstR/dz9rLmmhrPziQwKus1gnX4oUk46a1BpsvE4ORFvHC5eF4CHbQJqLedUA0
qz2k5kRpBp5Jes4LDSMQU0TEAY0jEUb7w4cPK0OMfIkzEIXXDxcuXLKRIwkT6dKOgoBR5WRo
fHKcm4cLl6zkKCg0sasKjw/A3pnH4XF4nMzjqH2rgepbuaV4HB6nN0+RkT9FPA6P08enyMR5
HhcuveR58lNUwJ8iLlz6+BSZ+VPEhUsfnyILf4q4cOmVHAkkAtcrq8PUD9s8qPxgpTSjv1n5
QVx1SYj0opGNOWsFytpIfBbh4kBdQgqz4UWUjbHopaHmuBiOLI2KPo0P48hLL+Q9UuHTW94/
J9OXyvtfrALzk6aynCCFpOVSclbqSwTjA21kKR61kHTXqVdEna8KEWz/mavaQ7FwWygSF2cE
4yEQxS+7eWsneqsn+r1+L4jg1Y5UtDkzYCRc5xG8wmdeNB5aEo1expywqrWoBrqYhEIx9YxN
ih6PNkdb1VC8I+hm/Oo3cR6hFyOnvLx37zlatlBv0bqAMREA6mKf3ooQ+H8AAAD//wMAriyX
rg==</Template></GraphPadPrismFile>
