# Supplementary material for: Regulation of stem/progenitor cell maintenance by BMP5 in prostate homeostasis and cancer initiation
Source: eLife journal article supplement (doi:10.7554/elife.54542), 2020-09-07
Supplement: fig4-data1 [file elife-54542-fig4-data1-v2.pzfx]

<?xml version="1.0" encoding="UTF-8"?>
<GraphPadPrismFile xmlns="http://graphpad.com/prism/Prism.htm" PrismXMLVersion="5.00">
<Created>
<OriginalVersion CreatedByProgram="GraphPad Prism" CreatedByVersion="6.0.1.298" RegisteredTo="      " Login="Admin" DateTime="2020-07-16T14:07:34-05:00"/>
</Created>
<DefGraphButton ButtonID="101"/>
<InfoSequence>
<Ref ID="Info0" Selected="1"/>
</InfoSequence>
<Info ID="Info0">
<Title>Project info 1</Title>
<Notes>
</Notes>
<Constant><Name>Experiment Date</Name><Value>2020-04-14</Value></Constant>
<Constant><Name>Experiment ID</Name><Value/></Constant>
<Constant><Name>Notebook ID</Name><Value/></Constant>
<Constant><Name>Project</Name><Value/></Constant>
<Constant><Name>Experimenter</Name><Value/></Constant>
<Constant><Name>Protocol</Name><Value/></Constant>
</Info>

<TableSequence>

<Ref ID="Table0"/>
<Ref ID="Table11"/>
<Ref ID="Table17" Selected="1"/>
<Ref ID="Table21"/>
</TableSequence>
<Table ID="Table0" XFormat="numbers" YFormat="replicates" Replicates="1" TableType="XY" EVFormat="AsteriskAfterNumber">
<Title>Fig4A</Title>
<RowTitlesColumn Width="39">
<Subcolumn>
<d>0</d>
<d>1</d>
<d>2</d>
<d>3</d>
<d>4</d>
<d>5</d>
<d>6</d>
<d>7</d>
<d>8</d>
<d>9</d>
<d>10</d>
<d>11</d>
</Subcolumn>
</RowTitlesColumn>
<XColumn Width="81" Decimals="0" Subcolumns="1">
<Title>Passage</Title>
<Subcolumn>
<d>0</d>
<d>1</d>
<d>2</d>
<d>3</d>
<d>4</d>
<d>5</d>
<d>6</d>
<d>7</d>
<d>8</d>
<d>9</d>
<d>10</d>
<d>11</d>
</Subcolumn>
</XColumn>
<YColumn Width="81" Decimals="2" Subcolumns="1">
<Title>Wild type</Title>
<Subcolumn>
<d>0.1</d>
<d>0.31</d>
<d>1.88</d>
<d>2.19</d>
<d>2.25</d>
<d>3.02</d>
<d>1.29</d>
<d>0.32</d>
<d>0</d>
</Subcolumn>
</YColumn>
<YColumn Width="125" Decimals="2" Subcolumns="1">
<Title>Krt5CreERT2 Pten f/f</Title>
<Subcolumn>
<d>0.1</d>
<d>0.14</d>
<d>0.26</d>
<d>0.5</d>
<d>1.4</d>
<d>7.02</d>
<d>26.08</d>
<d>83.85</d>
<d>111.8</d>
<d>160.58</d>
<d>284.58</d>
<d>525.96</d>
</Subcolumn>
</YColumn>
<YColumn Width="181" Decimals="2" Subcolumns="1">
<Title>Krt5CreERT2 Pten f/f + Noggin</Title>
<Subcolumn>
<d/>
<d/>
<d/>
<d/>
<d/>
<d>7.02</d>
<d>14.84</d>
<d>31.63</d>
<d>22.36</d>
<d>16.95</d>
<d>7.86</d>
<d>6.63</d>
</Subcolumn>
</YColumn>
</Table>
<Table ID="Table11" XFormat="none" YFormat="SDN" TableType="TwoWay" EVFormat="AsteriskAfterNumber">
<Title>Fig4A growth rate</Title>
<RowTitlesColumn Width="109">
<Subcolumn>
<d>growth rate (k)</d>
</Subcolumn>
</RowTitlesColumn>
<YColumn Width="243" Decimals="6" Subcolumns="3">
<Title>Wild type</Title>
<Subcolumn>
<d>-0.0057</d>
</Subcolumn>
<Subcolumn>
<d>0.1225</d>
</Subcolumn>
<Subcolumn>
<d>9</d>
</Subcolumn>
</YColumn>
<YColumn Width="243" Decimals="6" Subcolumns="3">
<Title>Krt5CreERT2 Pten f/f</Title>
<Subcolumn>
<d>0.558</d>
</Subcolumn>
<Subcolumn>
<d>0.02329</d>
</Subcolumn>
<Subcolumn>
<d>12</d>
</Subcolumn>
</YColumn>
<YColumn Width="243" Decimals="6" Subcolumns="3">
<Title>Krt5CreERT2 Pten f/f + Noggin</Title>
<Subcolumn>
<d>-0.04962</d>
</Subcolumn>
<Subcolumn>
<d>0.1234</d>
</Subcolumn>
<Subcolumn>
<d>7</d>
</Subcolumn>
</YColumn>
</Table>
<Table ID="Table17" XFormat="numbers" YFormat="replicates" Replicates="1" TableType="XY" EVFormat="AsteriskAfterNumber">
<Title>Fig4F</Title>
<RowTitlesColumn Width="39">
<Subcolumn>
<d>0.</d>
<d>1.</d>
<d>2.</d>
<d>3.</d>
<d>4.</d>
<d>5.</d>
<d>6</d>
</Subcolumn>
</RowTitlesColumn>
<XColumn Width="81" Decimals="0" Subcolumns="1">
<Title>Passage</Title>
<Subcolumn>
<d>0</d>
<d>1</d>
<d>2</d>
<d>3</d>
<d>4</d>
<d>5</d>
<d>6</d>
</Subcolumn>
</XColumn>
<YColumn Width="81" Decimals="6" Subcolumns="1">
<Title>Wild type</Title>
<Subcolumn>
<d>0.1</d>
<d>0.15</d>
<d>0.76</d>
<d>1.06</d>
<d>2.18</d>
<d>0.97</d>
<d>1.99</d>
</Subcolumn>
</YColumn>
<YColumn Width="125" Decimals="6" Subcolumns="1">
<Title>Krt5CreERT2 Pten f/f</Title>
<Subcolumn>
<d>0.1</d>
<d>0.87</d>
<d>2.39</d>
<d>6.18</d>
<d>27.37</d>
<d>46.53</d>
<d>79.11</d>
</Subcolumn>
</YColumn>
<YColumn Width="199" Decimals="6" Subcolumns="1">
<Title>Krt5CreERT2 Pten f/fBmp5SE/SE</Title>
<Subcolumn>
<d>0.1</d>
<d>0.34</d>
<d>1.07</d>
<d>1.28</d>
<d>2.56</d>
<d>3.2</d>
<d>4</d>
</Subcolumn>
</YColumn>
<YColumn Width="82" Decimals="6" Subcolumns="1">
<Title>Bmp5 SE/SE</Title>
<Subcolumn>
<d>0.1</d>
<d>0.1</d>
<d>0.38</d>
<d>0.37</d>
<d>0.8</d>
<d>0.83</d>
<d>0.86</d>
</Subcolumn>
</YColumn>
</Table>
<Table ID="Table21" XFormat="none" YFormat="SDN" TableType="TwoWay" EVFormat="AsteriskAfterNumber">
<Title>Fig4F growth rate</Title>
<RowTitlesColumn Width="109">
<Subcolumn>
<d>growth rate (k)</d>
</Subcolumn>
</RowTitlesColumn>
<YColumn Width="243" Decimals="5" Subcolumns="3">
<Title>Wild type</Title>
<Subcolumn>
<d>0.2595</d>
</Subcolumn>
<Subcolumn>
<d>0.1198</d>
</Subcolumn>
<Subcolumn>
<d>7</d>
</Subcolumn>
</YColumn>
<YColumn Width="243" Decimals="5" Subcolumns="3">
<Title>Krt5CreERT2 Pten f/f</Title>
<Subcolumn>
<d>0.6368</d>
</Subcolumn>
<Subcolumn>
<d>0.06337</d>
</Subcolumn>
<Subcolumn>
<d>7</d>
</Subcolumn>
</YColumn>
<YColumn Width="243" Decimals="5" Subcolumns="3">
<Title>Krt5CreERT2 Pten f/fBmp5SE/SE</Title>
<Subcolumn>
<d>0.3628</d>
</Subcolumn>
<Subcolumn>
<d>0.05045</d>
</Subcolumn>
<Subcolumn>
<d>7</d>
</Subcolumn>
</YColumn>
<YColumn Width="243" Decimals="5" Subcolumns="3">
<Title>Bmp5 SE/SE</Title>
<Subcolumn>
<d>0.2718</d>
</Subcolumn>
<Subcolumn>
<d>0.06795</d>
</Subcolumn>
<Subcolumn>
<d>7</d>
</Subcolumn>
</YColumn>
</Table>

<!--Analyses, graphs and layouts as compressed binary. Don't edit this part of the file.-->

<Template xmlns:dt="urn:schemas-microsoft-com:datatypes" dt:dt="bin.base64">eNrsvQt8VNW597/2zORKuCcYLoYh4U4IiOAdEqogfbkFElH7YjUkEzISEsyFEIUYqyIqHi7R
ejmn/Xv6b0s857RqT7VyTCoebKWnVZqQAgekrchRCkECBE4FPs671p5nTdZs9kxmkglOkt/S
L3vtvddez7Oe9axnrX0ZyLx97tw7l86erlXHMca2als1C/8zj91j+Wc2mh+5x8K8ktzXOK8k
MiZ2LdWZ4xi7g+dEHSs5EZxWXmQgHbMqNdgIC9Wi0fE+zF0+gSEhISEhISF11xTFiab5HwkJ
CQkJCan7JSvd0yMhISEhISEhISEhISEhISEhISEhISEhdS5Z2bf4n82DGdszlLGlVsYW2IK5
3sXTJ5rGItxf2NnY82Ha0Mhq8SngSBalN9idZpc4cwr9NFh8mthP2d/q/orQatGSqR73gWWO
krycohyfssdxBvitR//AkWVVrl5RXMj81jPYtJ5BVI9Vr+duZ9HKPE6pn3aNMK3HQvW4TZLt
XO0otS9yVNiXFq/OKbqinhROX7/6iNc5G1nGu//y8Qf7//j7j5l5PaN92kfqE6nXI6r5/cd/
+B/mp544v/VEeerR1emwPtH6gduLy0ucjhJhIearHvP+uo7qiXHbucSxojy3wFFmX5jFTOoZ
w+nv139i9XbptvFTj73ddvXRD2R8K6csp2glC74e2e9x7n7XB5j9riJnbnGeQ1TmnSa1O776
tvmPu3Gm9bTf7/3c9Xz8oz2nGn7zH4d81DOxXTv31+tZUJ7rzMux31mSU5TnYFfWY0xbtba8
u54Byni3ZztXOkqYST3CzgP92pnOtlOPv+SuZ5Ce/1Zx8Sr77KIy50PlOWb1jPfZX1KfwXpM
dHf7t4oL8+zfLsspdOYa6mnmk4a6X2cx6hOv1LMop6SkuIKZ1NNqqIf0iWqrx/2Zd3ZOAR/n
zGc9xvhM+ij9PsQ93vm1K0qcLNB6rvSfa9x2LikvLbBn5ZY41/Ahls3M6ok11OPS6/kW1ZPo
HqcLcwpXlhfZ7ywuKxDK5JqML//+PFQ/sIT5r0ekpkT3dHf8OZfrgWzP3E/1DFP7vTAndxUz
q+dsu/0+nPwwr7jIyS1jv72Yj7CiUkeeVz1jPZHTlx+O8Pgzj8v2xdwRs8oqCx3Mu54Wgz73
WIz1XKsfmOcoXOsoc+bmMPN62h/vSdRfztyS4tLi/DL7vTnzHE5mqMdf/InM2KDPyuLnEFWe
3PM0E7k7w72nee1ZvPasXns22ntWz1VzXmBNUW2lOq4tfmSBhISEhIT0TScxMf8jk485fsvW
Wrx/LImEdHWSJePmavciO0a/x1tUXFToLLLnO8vsxfn2uc6V02fzO58RmvejSP1Gw2JWX+9c
g95Cd5kR+th2Cfh9zDv6XaHFxzW3eu4NRLpNv5ePIdtqyn2CWXqdpdIdqVra6ueKmfo9mjvG
fM33v6brvqbzFiX/KitQalSv+NqkZlmL7G/jeYvX+Ss1POFpi4yMUrKNLBrJ2n5WJiyUrt9N
ev2QPFrxS3Ffp5eb81B5TpmzuEi5QF7EbPGe2zL3BQP1xxIrCh3C70scpeWFZaUGSbrzJzK7
xetCod3t5SVrHWZ6JbJoa7ulPSm67Q7QopfW6zAvGBFowchAC0YFWjA60IIxVxacy+4Qmo/a
xf5xL6IvElJPTcetStSMcm/vV875XZUoeRE+XC4rzRvq/CECDM0rGVsyvCrYtULsv/ryy6+l
e9ec6F2OjRX7u67/6vSdytaY2jtvklrS2yshA6PYGmdu5mMmZ8oaYTe7GCme/sdxK8dHfI/9
QUvz/FjLvar44e8efdS9J3MWT87qydk8uQhPLtKTi/Lkoj25GE8u1pPrY5DmrQFyyCGH3NXM
VXtyj5mcvboxMc6T6+vJ9fPk+ntyAzy5gZ7cIE9usCcX78kleHJDPLlrPLlET26oJzfMkxvu
yY3w5K715JI8uZGenN2TG+/JJXtyKZ7caE9ujCc31pMbZ1LLBE9uoic3yZNL9eQme3J3Vqcq
989yO2kAi9UMd69y9pxXXaKsLfTZVJ/RtfbnbL2c/i0GX1P8zv/crq4S9HwlfV1gcbufy/1n
qf41Qdtda3W6OvPL/W/r1947896pEx3r1oxfNfGeCX1jWaZ+uzVn3ZriIkdRmXjHu7KkuKKs
wO6Qt7y/cFvk39kCcV9b4Cz1nLLn5hTZVzjsBTklefayYvGoJ82eXVJpzy8vLXUWrbRXOHlF
ZQUOu7PIqde9Nqew3GHPLy6xz09jv9QXcqIFS9gv5doOCQkJqZukpe7gmKU/G7t3KlvFQ6TX
d0Iyven5mkOkD+h5riaCs3se6vPRHxbMcmc3s+YY9zyUnVPOTooYviySrbQdqHjp+aYKHsKv
mzJ/0j2T7+mtRr9uyqre7XXzzQ4Kf7mjuHxFoZh5xee9zOMvCxaNnzah9/pMYZFo/ir4CxIS
EtI3m1yGT3N7YTUWA+v1b++3sm3sAX5Hnsy5ib2mv802/oDJswqkpN4yB3/FvIxl1bEejUS6
23T1eo/p0XvpW351BSKearycXqs/kbD4sYDmU19jUtfNXVXvMrKD5l6Td9wOvPU70/WcffYP
t3dbO1jcz5g6boddSU8Oy+jOdrgz4/v0NdOLfFS6Uz5tX49g7AI/+ZFuH29Z4tcS/p6mhSy9
VD1IDzsaFzuCWTyvQVPbe6DXN81jihrdMEFJzdhZLbb/wQaQRPlpjL3AUbjGz5VXxSi4Rf3G
Uobo/1uWzrnzfqWn73f3dG+5Rd2Z8Tf9x4qinVsjeTDgA+37GS97xttPvSbMG5j7543i7A5W
7iOQ3Ts1xOPp5eH/8PzQ11o9bx7aRGuGkqtCPZQT3y6P/+U9Fe9Jb2gTbWy5ePAVUtExb2+f
Mf1Lxy65/moTbfyAxNtBQyA6veZAaUv+d0m0VRGtLhpj3H0dWtEvJW4cNfzDL2Rfx/gWzfs6
tKJ/9vOH9wy57z0SrSmibYYpM+StLnylYts/7TvynpTRJjrCIDrkrZ5e59z5wvFG6eGK6EiD
aOHhIRXtfjN5mt5OWxTRUX6fEoZctFURHW246Ql5X3/er37sc7nRGVJGm+gYg+iQ9/UT/X6b
+MfJjdLDFdGxBtEh7+sRXw5a8z+D+8hopojuYxAd8r7+has2at8HFhnNLOYhRcyCdzhWljgc
pfrX/zyTV7w6JCvBEbKv43yLXmov5TWWOFjIRG9e/9J3/ydD9rUf0bNXlBYXlpc57Fnlq0XT
s3RFSjsuOm1Pxa4NCaOp1RY/orMq09axUIq+Yf/vf3hywjlqtVURHafe8rvHdWhF/8P62Iax
/3smXQppE93XIJqP69CKvngo+fKAw5+SaHWV0s8gWl+lhFL00M2N1/zg3y6TaHWV0t8g2ntc
h0D0o3e/OdH+13Mk2myVopmuUkIgesudXy5avKNB9nWMb9HeMTwEoo8988FP3/7vF2VfK6IH
KAbXuqLV/Yb/+Hf/dftfZauVSXOgQXTIW/3l4eL3Wq+TotVVyiCDaO+ZKwSi5zwb+cOI2y5K
D1dEDzaIDrmHD/nj5oHXTTkrPVwRHa+ItnRFX79w8lszC/5wSfa1MmkmGESHvK8jD/3ppslP
fCb7WhE9xCA65H39z9Pm/eL//MAl+1oRfY1BdMj7et6bt//0wN/Oy762mIcUH6uUzol2J/d8
rZmuUjTfq5ROLhWmf1a+oPG07Gs/okO+Srnw+PUPnnr9JWq1xY/okK9SJs/7t6hfpkwg0eoq
JVFZCHfJKmXTT79/ev1/3JAhhbSJHmoQHfJVyn9PWlhw38rX3nMLUVcpwwyiQ75KKZyZ9qPN
46bvYvSmoE30cIPokI/ro9pPKna0TCLRZqsUS1etUo6vu/7ueXGevo7xLTrkMfzpxx+ufvVl
97MUi9cqZYRi8C5Zpfzpl/867ZGLGWRwdZVyrUF0yFv9yMxxs59af0B6uCI6ySA65DOX+kDD
4rVKGWkQHXIP9xatrlLshpfHIe/rn08eNXD9oSzp4cqkOcogOuR9/eTZwV+8ntwgPVwRnWwQ
HfK+rvjJ3h/s+kOEjGaK6BSD6JD39UMpv/mvrTd9TR5utkqxdO0qJV72dZxv0SFfpex6Pm3R
f5b+VPa1H9EhX6X8YNO3P3j2chW12uJHdMhXKbet+m3Fd0+kkGhrnPlLaY9ow+2+7887jFdY
gr7CGvQV0ApaQStoBa2gFbSCVtAKWvUWrW6mv+Yuih3Ta/q0+gG2+T4Ls91n8dJlNN/ZY7iv
Z1chCR3Uf2cihR/4UNnfkcDYbwYyZp+zcK4oLfSOt3p/nyKS/H5NfMXbcsVjOBurfs2qPxaI
phdWcaztr1UboLS/j2F/CJVNpLdN8nu5BMpb6fsJ9QPjJOVZrmrboXSNMO2YtrfS1eKX6nl+
bCCvH+XVsup087x5UuVJO6jtkcek7vKvDijR3H95+zg67vkrA1pavOoVx83aMVGpq1Rjuv+G
qh2+dBV/2cEbrvb14Ee09vSQw0D46HTOq6Kv+SFZh/jLC2VeY3bdHwaYjhyX/B8JCQkJqQel
/Pz8I+Xl5a41a9YAAAAIc0S8FnFbjeMOh+PQli1bXMeOHXOdO3cOAABAmCPitYjbIn7LWC7i
+9GjR13Nzc2uvXv3AgAACHNEvBZxW8RvGcvFel3E+YaGBgAAAN0EEbdF/FZjeWtrq6uxsREA
AEA3QcRtxHIAAEAsBwAAEJ6xvKmpCQAAQDcBsRwAAHpmLD9//rxr//79AAAAugkibiOWAwAA
YjkAAIDwjOUHDx4EAADQTUAsBwCAnhnLL1y44Dp06BAAAIBugojbiOUAAIBYDgAAIDxj+eHD
hwEAAHQTEMsBAACxHAAAQPjG8iNHjgAAAOgmIJYDAEDPjOUXL150nTx5EgAAQDdBxG3EcgAA
QCwHAAAQnrG8ubkZAABANwGxHAAAEMsBAACEbyw/deoUAACAbgJiOQAA9MxYfunSJdfp06cB
AAB0E0TcRiwHAADEcgAAAOEZy1taWgAAAHQTEMsBAKDnxvIzZ84AAADoJiCWAwAAYjkAAIDw
jOWXL192nT17FgAAQDdBxG01lpeXl7tOnDih/4YI9gEAgPBHxGsRt0X8lrF85cr8T7Zt2+Y6
fvy4HucBAACENyJei7gt4jdT0vLly/dUVFTo63UAAADhjYjXIm4zJCQkJKQek+ZzMjhTOREc
O0cjBijlRvMDk0z2x3JGcCx0XKPt7t272Ri+jaNzw6k+We4G2i+mC2TZKMaqxyvXJVPexdMo
vo3mDKJj4tIhlBdpqXiPq7mvO8/Lq+2sI8FWi5a8kGXxdmaxHFbESvWcg5UwJ8sP2GrTmhjZ
ahDpOVuvIYcV6uct7GmuaH+PPVyuTXz/eOXMCFlDS0p/q0ZtF+USnyqM3fpuHOtbkluxtV9h
bDQvP5CfyDu2oiLvljc/npvKKriVrG6smqg/75Znef4tLZPk9Ce5GbQvrhE8v95dTliq9Ync
CpHfKo6d2xfzkqW/tZbLE/rw+lgc1+ENzm11cfr1e3j+6YaateKavLW6+Zncqv0rbW81sf1W
DbbvKtsLe8txsUIZFwOV/HxlLAsjJNA5myE/lxNPdWUvysyM5Bcv4fldnBgql0hjOUYZd4zq
F2RSLKmmuCLSRval5/x4pazmiRbmSbhR+teM0B4zx31+JG0f5VwUvkg+IvS/zRKc/s3iGq0t
mP2WbfKhf/QVOl9n0D81PpIdWHcjO1x1K0sdFMkmD45i+8pnsC82z2EHKm/i56PZO3fZ2YSB
Eeyjoqnsk0dvZQcfuYl9kDuBvf/uaeZ0fsWmDonh59LYwcoZrH75aPb5gX3s47feYI78Vvbr
74xie/LGstcXDGOnPvsrO9rUwO5f8SXbNDaSvTgtlr0yvQ97elwU2/nWF+zu+z5nO+vOspOf
/oVl3v1ndueSJjZr/u/ZjDm7WGr6r1jKzT9jI67/CYtP+wHrN/FFpmlT1aRp2pSkpKQpYkuk
JSYmpoktMVlNfD+Vl08VW2ISLz9JbImJauL7E3j5CWJLjB03btxYvh1P2EclJ6eMHuNOfF8b
Nnz4iGuTkkby60by3cHxCQlDrklMHMrlDNW0uL79+vcfMHCQO2mRUdExsVofzZOstgjNK1m8
9ozjIUrzno/U+Jfo8addLIn25bgUcTFBmas0wxw23DDXqnNaNmcT50dU1ynSSVy3Meel2UWH
354tz8VyFlw5hvT0gO6bFTxKVvJxMZstYovZMr6NorEgtpEUB6LpWAzlo9vRMZg1xB6TfTWW
JSr1qnZMIDsmd8KOH3BepLr+TvWqdpTn4v3YsYznF7JyPteU8TlnDd86eHtzWTFbzfdy9Jmo
lO+J2S2GbGqhtlmU/Ug6FklEK3lZNkI5FtHFfaD69XilP9S1mPTnoXSspaVFt6u01UROCmeW
wa6qHRcoa0BRfjQnnY6Po/6W551Op8W4zpCyxTmjbBakbE2RbVZvSpBtSjFpk1m9GtWXHGC9
snyKUu+Ytr73uV4u4dtXbW5/nqK0Q+4P8PiGS5mIq9PN8nJJJ9ZY00W9zB0szOdFu+47ejC5
claX//eolJubW+VwOFwPPviga9WqVaaI8/7qyM/Pr3rooYf0523r1q27guLi4nbNxuVXiffn
jzzyiGv9+vVelJaWBmT2oqKiqocffthVXV3teuyxxzwIHQK1B9ehSly/ceNG11NPPaVTVVUV
VLfzNlSJ65999lnX5s2bXY8//njQbsP1rhLXindRzzzzTIfc7sknn6zaunWr67nnnuuw23LZ
VZ25XiR+fVVPGjPq/fo5P/fr3vd3nUiZ3+y9Y79O3jvepHXu3lGdR+XaIdJkXr/48597zevp
NHdkBTi3ptMcmG2Y163Shv37W4z3sJ41BT9nlM2ClK0pss3qTQmyTSkmbTKrV6P6kgOsV5ZP
Ueo1m9ethnk9m8r3I73EfL7IIG+QYosFylSstiNTvyc44opqxx+M67xs0rkgwD7JJplOH/5g
XOdZ/azzsmkbjGxNke1rnRdMm1JM2uRrnVdAfVcQoD8UUP3ODvpDNvlDrok/ZJv4g9oO4Q/T
2Mmg/cFJOm8IsE+cJLMqBP7gpG0wsjVFti9/CKZNKSZt8uUPG6jvNgToDxuo/qoO+oOT/GGd
iT84TfxBbYfwh+s74A9VpPP2APukimTWhMAf5AIpGNmaItuXPwTTphSTNvnyh+3Ud9sD9Ift
VH9NB/2hivzhORN/qDLxB7Udmfq9X/D+UEM67wiwT2pIZm0I/KGGtsHI1hTZvvwhmDalmLTJ
lz/soL7bEaA/7KD6azvoDzXkDz8y8YcaE39Q2yH8YUYH/KGWdK4LsE9qSWZ9CPyhVt5fBCFb
U2T78odg2pRi0iZf/lBHfVcXoD/UUf31HfSHWvKHX5n4Q62JP6jtyNTf6wbvD/Wk84cB9kk9
yWwMgT/U0zYY2Zoi25c/BNOmFJM2+dJXfRYdiD80UP2NHfSHevKHD038od7EH9R2CH+4kTXr
/iB9QD7TX6OZvwOwBOk7wdijhGTupvcxnfWdYGS/byI7kL7oiva//w20X5WthdDHRb3xhjYF
Ylf53YrVz3crVuWdi9Rffrey2893K1YaP9nttOcVrU22HENGH83Un1c1u2yGbyzO+fnGAs/L
Qvu8TH0vWV1d7Tc+iW7pjC8nUN9PNIxP5VWK1/i0+fB3m484YqzPON5tIYx3xrYEoqf6/rej
zyuDtflE0jPdh82Nzyttfp5XBmsjo+xQ1Cvb9D59oxfKemdRvelB9GmgsXCiSSxU7eOOhadc
Nh/fP4VqDKaTzOyrNAZbhg3z7V/8XEfbsosXmGloSzjqWSK/MwtST/X7ByVuWIaYxBBrgPlA
fLVME/Ogt6+Wkd+IsZHlebZ+yuteyKhnqP02m/ra2QPmDmNbOqOny6TdHpvzc52xeQHp6+wm
frvMxG+zqQ0Fnme+V9dvndTXVT3Ab41tCVe/3UD6VoWB3+YF4LerSB/Vb53Uhg1Uz1SWxpmh
f8too28ar6YfV1Hf1/QAPza2JVz9eDvp2xE9Q9XvNWSr2h7Q78a2hGu/7yB9a8Mgfm0KIH69
wNq+z5bxq4baINrygP5dsUP/XYyd3aH/Iiafx7M+ShyTcS2GZEtsVzHG1ZJ/1PcAXze2JVx9
vY70rf8GY1w92aqxB/S7sS3h2u8NpG9jGMS4dQHEuPcoRqkxrp7aINqynDNZX6XNYDfwu4wb
WYvLpsS1KAO+2mL2GxyryTsmqWcJPQeTZeX9j7ruTKFnTfKaUr6fqtfZopQy/zbeV1L7y5dO
4hv9N1zt69HRb/QH8EOyDuEzMi+/0R9g+kVyz/xGHwkJCam3p/z8/CPiN0L4u40AACD8EfFa
xG01jjscjkNbtmxxHTt2zHXu3DkAAABhjojXIm6L+C1juYjvR48edTU3N7v27t0LAAAgzBHx
WsRt9d8sEet1EecbGhoAAAB0E0TcNv67sK2tra7GxkYAAADdBBG3EcsBAACxHAAAQHjG8qam
JgAAAN0ExHIAAOiZsfz8+fOu/fv3AwAA6CaIuI1YDgAAiOUAAADCM5YfPHgQAABANwGxHAAA
emYsv3DhguvQoUMAAAC6CSJuI5YDAABiOQAAgPCM5YcPHwYAANBNQCwHAADEcgAAAOEby48c
OQIAAKCbgFgOAAA9M5ZfvHjRdfLkSQAAAN0EEbcRywEAALEcAABAeMby5uZmAAAA3QTEcgAA
QCwHAAAQvrH81KlTAAAAugmI5QAA0DNj+aVLl1ynT58GAADQTRBxG7EcAAAQywEAAIRnLG9p
aQEAANBNQCwHAICeG8vPnDkDAACgm4BYDgAAiOUAAADCM5ZfvnzZdfbsWQAAAN0EEbfVWF5e
Xu46ceKE/hsi2AcAAMIfEa9F3BbxW8bylSvzP9m2bZvr+PHjepwHAAAQ3oh4LeK2iN9MScuX
L99TUVGhr9cBAACENyJei7jNkJCQkJB6TJrPyeBM5URw7ByNGKCUG80PTDLZH8sZwbHRcY22
u3fvZmP4No7ODaf6LHT+Btovpgtk2SjGqscr1yVT3sXTKL6N5gyiY+LSIZQXaal4j6u5rzvP
y6vtrCPBVouWvJBl8XZmsRxWxEr1nIOVMCfLD9hq05oY2WoQtWm2XkMOK9TPW9jTXNH+Hnu4
XJv4/vHKmRGyhpaU/laN2i7KJT5VGLv13TjWtyS3Ymu/wthoXn4gP5F3bEVF3i1vfjw3lVVw
K1ndWDVRf94tz/L8W1omyelPcjNoX1wjeH69u5ywVOsTuRUiv1UcO7cv5iVLf2stlyf04fWx
OK7DG5zb6uL06/fw/NMNNWvFNXlrdfMzuVX7V9o+wsT2WzXYvqtsLxolx8UKZVwMVPLzlbEs
yico/abm53Liqa7sRZmZkfziJTy/ixND5RJpLMco445R/YJMiiXVFFdE2si+9Jwfr5TVPNHC
PAk3Sv+aEdpj5rjPj6Tto5yLwhfJR4T+t1mC079ZXKO1BbPfsk0+9I++QufrDPqnxkeyA+tu
ZIerbmWpgyLZ5MFRbF/5DPbF5jnsQOVN/Hw0e+cuO5swMIJ9VDSVffLorezgIzexD3InsPff
Pc2czq/Y1CEx/FwaO1g5g9UvH80+P7CPffzWG8yR38p+/Z1RbE/eWPb6gmHs1Gd/ZUebGtj9
K75km8ZGshenxbJXpvdhT4+LYjvf+oLdfd/nbGfdWXby07+wzLv/zO5c0sRmzf89mzFnF0tN
/xVLuflnbMT1P2HxaT9g/Sa+yDRtqpo0TZuSlJQ0RWyJtMTExDSxJSarie+n8vKpYktM4uUn
iS0xUU18fwIvP0FsibHjxo0by7fjCfuo5OSU0WPcie9rw4YPH3FtUtJIft1Ivjs4PiFhyDWJ
iUO5nKGaFte3X//+AwYOcictMio6Jlbro3mS1RaheSWL155xPERp3vORGv8SPf60iyXRvhyX
Ii4mKHOVZpjDhhvmWnVOy+Zs4vyI6jpFOonrNua8NLvo8Nuz5blYzoIrx5CeHtB9s4JHyUo+
LmazRWwxW8a3UTQWxDaS2hJNx2IoH92OjsGsIfaY7KuxLFGpV7VjAtkxuRN2/IDzItX1d6pX
taM8F+/HjmU8v5CV87mmjM85a/jWwduby4rZar6Xo89EpXxPzG4xZFMxR1lpG6lsrbSNJBtH
KsctZA95LKKL+0D16/FKf6hrMenPQ+lYS0uLbldhq9GciZwUXt8sg11VOy6gtsnyJbxgOh0f
R/0t15JOp9NiXGdI2eJctqGfZB+1J1v4kVG2Wb1Cx1lBtmkW1S/rHdPWRz7XtbKM1cTGYg5R
9UknfbIC1Ced2pntw8ZySa7aOBCdpZ7G+lqGDfPZZ+JcR/tM3CfMNLSlM3q6TNrtsTk/p9o8
K0ibZ5G+weipjmUlBlrU46qfBJIX8t+hezSh7FZa36htkOcGka42Kp9OfpxFa6lFPOat5itM
sVq38/iWz//M5/FuNY93hRwHxTsxj/ShbRTVZ6O8lfJWpZxVQV7jyxbtjY1s6qeCAPspm/zJ
eZXGRlfGM2NbrtbYKAjS5gWkrzMMxkac5vb1ZZwTHIfJ2FhGc6k6NrKpDaItm32MDfMVgZ0f
cZdqGzuVAY+bKB/l1LGjHjfWZTbuOjPenNT3GwLseyf5aFUPGG/Gtlyt8bYhSJtvIH2rwmC8
FdL4WUXPGh42GW+raN2pjjcntUG05R59virk46iAjyD3PYrR/zvqz1Vk2+0B2raKfKCmB/iz
sS1Xy5+3B2nz7aRvR/T01e81pMOOAHWoIVvV9oB+N7blavX7jiBtvoP0rQ2DOPYJxaUXODs5
PzaJYy+QTDWO1VAbRFvWc+7iawKxTijh/zl4roz/mcfXBnP1FUOBvlIYp68aFvB1+B2edYLZ
GsFszo82iY02sqlaXj7r6WjcrKW+rAuwL2vJ5+p7wPgxtuVqjZ+6IG1eR/rWhzBu1pMOHwao
Qz3ZqrEH9LuxLVej34PVU9i8gfRtDIO4OZrut97jXGBX+o08N9oQN+upDaItz+v3Y3Z2t37v
JKJlGb+DWqM/hV3LY2Ua387ncbOMzWC363F1DlvKpU/jxzP1CFuk331N4cj42ddwP2SMq/JY
hOF8jKFsjElMVa+PMYnR6jMRX3ZX+0bN96Nn1fL9VbwuI5X/ubgkz1mUU1JpLy5yTK7IqbTP
XrR42Wx7cb59rnPl9Nn2lSXFFWUF9pKcMgeLZSO4bZdyBRbY2vxLs7i3qs9dje8RNLpPkEnG
F5l2JDD2m4HcB+YsnCtK2+6zsHir+xm51ztnfmAYb08Gv77FKOSojVW/ZvU8a5XvSuV7jwHK
c3Fxr3yLfkQYIIpLvMQR1nhH7yP5LF9Ngzm3ekb3bXqPxNK75gHK+PWVZtJXEq/qGskvJmaR
HI3XeMJTp7SZRfEl+d4gSmlTuv6VhoXQX2za4j09a9PfHohrdEcxK829S/MqLd6ULCwvLHOu
KXTYc4tXr8kpcZYWF5UqF3tStHtfXGzRL9arNC9oDbSgLdCCEYEWjAy0YFSgBaMDLRhzZcG5
7A6uuYV7zCN98aESElJPSa4Qp/s9k42VJgRN2WvVWjUbDzj6sV3Xf3X6znDdyqB4v/dNgdKW
tglP83GuVXNjUyav1/Tp0hbA0kOmwK6wBH2FNegroBW0glbQClpBK2gFraAVtOotWt2c8Wm1
+2XVA2zzfRb9YZ+qg/Fj1t78kFLdlw+SxQNK9QPpBOWBfCzz/jBYfmxttK368kd9eSAe0Of5
sYG8fpRXy6rTzfPmSZVn9uMveUzqLu+HS+jHafJFi/QZ8cGyWq84btaOiUpdpXw/NYTt8KVr
CecNV/t68CNae3rIYSB8dLr+IJn3NT8k6xAvfmReY3bdHwaYjhyX/B8JCQkJqQel/Pz8I+Iv
28NfcgIAAOGPiNcibqtx3OFwHNqyZYvr2LFjrnPnzgEAAAhzRLwWcVvEbxnLRXw/evSoq7m5
2bV3714AAABhjojXIm6r/3iBWK+LON/Q0AAAAKCbIOK28R+IbG1tdTU2NgIAAOgmiLiNWA4A
AIjlAAAAwjOWNzU1AQAA6CYglgMAQM+M5efPn3ft378fAABAN0HEbcRyAABALAcAABCesfzg
wYMAAAC6CYjlAADQM2P5hQsXXIcOHQIAANBNEHEbsRwAABDLAQAAhGcsP3z4MAAAgG4CYjkA
ACCWAwAACN9YfuTIEQAAAN0ExHIAAOiZsfzixYuukydPAgAA6CaIuI1YDgAAiOUAAADCM5Y3
NzcDAADoJiCWAwAAYjkAAIDwjeWnTp0CAADQTUAsBwCAnhnLL1265Dp9+jQAAIBugojbiOUA
AIBYDgAAIDxjeUtLCwAAgG4CYjkAAPTcWH7mzBkAAADdBMRyAABALAcAABCesfzy5cuus2fP
AgAA6CaIuK3G8vLycteJEyf03xDBPgAAEP6IeC3itojfMpavXJn/ybZt21zHjx/X4zwAAIDw
RsRrEbdF/GZKWr58+Z6Kigp9vQ4AACC8EfFaxG2GhISEhNRj0nxOBmcqJ4Jj52jEAKXcaH5g
ksn+WM4IjoWOa7TdvXs3G8O3cXRuONUny91A+8V0gSwbxVj1eOW6ZMq7eBrFt9GcQXRMXDqE
8iItFe9xNfd153l5tZ11JNhq0ZIXsizeziyWw4pYqZ5zsBLmZPkBW21aEyNbDSI9Z+s15LBC
/byFPc0V7e+xh8u1ie8fr5wZIWtoSelv1ajtolziU4WxW9+NY31Lciu29iuMjeblB/ITecdW
VOTd8ubHc1NZBbeS1Y1VE/Xn3fIsz7+lZZKc/iQ3g/bFNYLn17vLCUu1PpFbIfJbxbFz+2Je
svS31nJ5Qh9eH4vjOrzBua0uTr9+D88/3VCzVlyTt1Y3P5NbtX+l7a0mtt+qwfZdZXthbzku
VijjYqCSn6+MZWGEBDpnM+TncuKpruxFmZmR/OIlPL+LE0PlEmksxyjjjlH9gkyKJdUUV0Ta
yL70nB+vlNU80cI8CTdK/5oR2mPmuM+PpO2jnIvCF8lHhP63WYLTv1lco7UFs9+yTT70j75C
5+sM+qfGR7ID625kh6tuZamDItnkwVFsX/kM9sXmOexA5U38fDR75y47mzAwgn1UNJV98uit
7OAjN7EPciew9989zZzOr9jUITH8XBo7WDmD1S8fzT4/sI99/NYbzJHfyn79nVFsT95Y9vqC
YezUZ39lR5sa2P0rvmSbxkayF6fFslem92FPj4tiO9/6gt193+dsZ91ZdvLTv7DMu//M7lzS
xGbN/z2bMWcXS03/FUu5+WdsxPU/YfFpP2D9Jr7ING2qmjRNm5KUlDRFbIm0xMTENLElJquJ
76fy8qliS0zi5SeJLTFRTXx/Ai8/QWyJsePGjRvLt+MJ+6jk5JTRY9yJ72vDhg8fcW1S0kh+
3Ui+Ozg+IWHINYmJQ7mcoZoW17df//4DBg5yJy0yKjomVuujeZLVFqF5JYvXnnE8RGne85Ea
/xI9/rSLJdG+HJciLiYoc5VmmMOGG+ZadU7L5mzi/IjqOkU6ies25rw0u+jw27PluVjOgivH
kJ4e0H2zgkfJSj4uZrNFbDFbxrdRNBbENpLiQDQdi6F8dDs6BrOG2GOyr8ayRKVe1Y4JZMfk
TtjxA86LVNffqV7VjvJcvB87lvH8QlbO55oyPues4VsHb28uK2ar+V6OPhOV8j0xu8WQTS3U
NouyH0nHIoloJS/LRijHIrq4D1S/Hq/0h7oWk/48lI61tLTodpW2mshJ4cwy2FW14wJlDSjK
j+ak0/Fx1N/yvNPptBjXGVK2OGeUzYKUrSmyzepNCbJNKSZtMqtXo/qSA6xXlk9R6h3T1vc+
18slfPuqze3PU5R2yP0BHt9wKRNxdbpZXi7pxBpruqiXuYOF+bxo131HDyZXzury/x6VcnNz
qxwOh+vBBx90rVq1yhRx3l8d+fn5VQ899JD+vG3dunVXUFxc3K7ZuPwq8f78kUceca1fv96L
0tLSgMxeVFRU9fDDD7uqq6tdjz32mAehQ6D24DpUies3btzoeuqpp3SqqqqC6nbehipx/bPP
PuvavHmz6/HHHw/abbjeVeJa8S7qmWee6ZDbPfnkk1Vbt251Pffccx12Wy67qjPXi8Svr+pJ
Y0a9Xz/n537d+/6uEynzm7137NfJe8ebtM7dO6rzqFw7RJrM6xd//nOveT2d5o6sAOfWdJoD
sw3zulXasH9/i/Ee1rOm4OeMslmQsjVFtlm9KUG2KcWkTWb1alRfcoD1yvIpSr1m87rVMK9n
U/l+pJeYzxcZ5A1SbLFAmYrVdmTq9wRHXFHt+INxnZdNOhcE2CfZJNPpwx+M6zyrn3VeNm2D
ka0psn2t84JpU4pJm3yt8wqo7woC9IcCqt/ZQX/IJn/INfGHbBN/UNsh/GEaOxm0PzhJ5w0B
9omTZFaFwB+ctA1GtqbI9uUPwbQpxaRNvvxhA/XdhgD9YQPVX9VBf3CSP6wz8QeniT+o7RD+
cH0H/KGKdN4eYJ9UkcyaEPiDXCAFI1tTZPvyh2DalGLSJl/+sJ36bnuA/rCd6q/poD9UkT88
Z+IPVSb+oLYjU7/3C94fakjnHQH2SQ3JrA2BP9TQNhjZmiLblz8E06YUkzb58ocd1Hc7AvSH
HVR/bQf9oYb84Ucm/lBj4g9qO4Q/zOiAP9SSznUB9kktyawPgT/UyvuLIGRrimxf/hBMm1JM
2uTLH+qo7+oC9Ic6qr++g/5QS/7wKxN/qDXxB7Udmfp73eD9oZ50/jDAPqknmY0h8Id62gYj
W1Nk+/KHYNqUYtImX/qqz6ID8YcGqr+xg/5QT/7woYk/1Jv4g9oO4Q83smbdH6QPyGf6azTz
dwCWIH0nGHuUkMzd9D6ms74TjOz3TWQH0hdd0f73v4H2q7K1EPq4qDfe0KZA7Cq/W7H6+W7F
qrxzkfrL71Z2+/luxUrjJ7ud9ryitcmWY8joo5n686pml83wjcU5P99Y4HlZaJ+Xqe8lq6ur
/cYn0S2d8eUE6vuJhvGpvErxGp82H/5u8xFHjPUZx7sthPHO2JZA9FTf/3b0eWWwNp9Ieqb7
sLnxeaXNz/PKYG1klB2KemWb3qdv9EJZ7yyqNz2IPg00Fk40iYWqfdyx8JTL5uP7p1CNwXSS
mX2VxmDLsGG+/Yuf62hbdvECMw1tCUc9S+R3ZkHqqX7/oMQNyxCTGGINMB+Ir5ZpYh709tUy
8hsxNrI8z9ZPed0LGfUMtd9mU187e8DcYWxLZ/R0mbTbY3N+rjM2LyB9nd3Eb5eZ+G02taHA
88z36vqtk/q6qgf4rbEt4eq3G0jfqjDw27wA/HYV6aP6rZPasIHqmcrSODP0bxlt9E3j1fTj
Kur7mh7gx8a2hKsfbyd9O6JnqPq9hmxV2wP63diWcO33HaRvbRjEr00BxK8XWNv32TJ+1VAb
RFse0L8rdui/i7GzO/RfxOTzeNZHiWMyrsWQbIntKsa4WvKP+h7g68a2hKuv15G+9d9gjKsn
WzX2gH43tiVc+72B9G0Mgxi3LoAY9x7FKDXG1VMbRFuWcybrq7QZ7AZ+l3Eja3HZlLgWZcBX
W8x+g2M1ecck9Syh52CyrLz/UdedKfSsSV5TyvdT9TpblFLm38b7Smp/+dJJfKP/hqt9PTr6
jf4AfkjWIXxG5uU3+gNMv0jumd/oIyEhIfX2lJ+ff0T8Rgh/txEAAIQ/Il6LuK3GcYfDcWjL
li2uY8eOuc6dOwcAACDMEfFaxG0Rv2UsF/H96NGjrubmZtfevXsBAACEOSJei7it/pslYr0u
4nxDQwMAAIBugojbxn8XtrW11dXY2AgAAKCbIOI2YjkAACCWAwAACM9Y3tTUBAAAoJuAWA4A
AD0zlp8/f961f/9+AAAA3QQRtxHLAQAAsRwAAEB4xvKDBw8CAADoJiCWAwBAz4zlFy5ccB06
dAgAAEA3QcRtxHIAAEAsBwAAEJ6x/PDhwwAAALoJiOUAAIBYDgAAIHxj+ZEjRwAAAHQTEMsB
AKBnxvKLFy+6Tp48CQAAoJsg4jZiOQAAIJYDAAAIz1je3NwMAACgm4BYDgAAiOUAAADCN5af
OnUKAABANwGxHAAAemYsv3Tpkuv06dMAAAC6CSJuI5YDAABiOQAAgPCM5S0tLQAAALoJiOUA
ANBzY/mZM2cAAAB0ExDLAQAAsRwAAEB4xvLLly+7zp49CwAAoJsg4rYay8vLy10nTpzQf0ME
+wAAQPgj4rWI2yJ+y1i+cmX+J9u2bXMdP35cj/MAAADCGxGvRdwW8Zspafny5XsqKir09ToA
AIDwRsRrEbcZEhISElKPSfM5GZypnAiOnaMRA5Ryo/mBSSb7YzkjODY6rtF29+7dbAzfxtG5
4VSfhc7fQPvFdIEsG8VY9XjlumTKu3gaxbfRnEF0TFw6hPIiLRXvcTX3ded5ebWddSTYatGS
F7Is3s4slsOKWKmec7AS5mT5AVttWhMjWw2iNs3Wa8hhhfp5C3uaK9rfYw+XaxPfP145M0LW
0JLS36pR20W5xKcKY7e+G8f6luRWbO1XGBvNyw/kJ/KOrajIu+XNj+emsgpuJasbqybqz7vl
WZ5/S8skOf1Jbgbti2sEz693lxOWan0it0Lkt4pj5/bFvGTpb63l8oQ+vD4Wx3V4g3NbXZx+
/R6ef7qhZq24Jm+tbn4mt2r/SttHmNh+qwbbd5XtRaPkuFihjIuBSn6+MpZF+QSl39T8XE48
1ZW9KDMzkl+8hOd3cWKoXCKN5Rhl3DGqX5BJsaSa4opIG9mXnvPjlbKaJ1qYJ+FG6V8zQnvM
HPf5kbR9lHNR+CL5iND/Nktw+jeLa7S2YPZbtsmH/tFX6HydQf/U+Eh2YN2N7HDVrSx1UCSb
PDiK7Sufwb7YPIcdqLyJn49m79xlZxMGRrCPiqayTx69lR185Cb2Qe4E9v67p5nT+RWbOiSG
n0tjBytnsPrlo9nnB/axj996gznyW9mvvzOK7ckby15fMIyd+uyv7GhTA7t/xZds09hI9uK0
WPbK9D7s6XFRbOdbX7C77/uc7aw7y05++heWefef2Z1Lmtis+b9nM+bsYqnpv2IpN/+Mjbj+
Jyw+7Qes38QXmaZNVZOmaVOSkpKmiC2RlpiYmCa2xGQ18f1UXj5VbIlJvPwksSUmqonvT+Dl
J4gtMXbcuHFj+XY8YR+VnJwyeow78X1t2PDhI65NShrJrxvJdwfHJyQMuSYxcSiXM1TT4vr2
699/wMBB7qRFRkXHxGp9NE+y2iI0r2Tx2jOOhyjNez5S41+ix592sSTal+NSxMUEZa7SDHPY
cMNcq85p2ZxNnB9RXadIJ3HdxpyXZhcdfnu2PBfLWXDlGNLTA7pvVvAoWcnHxWy2iC1my/g2
isaC2EZSW6LpWAzlo9vRMZg1xB6TfTWWJSr1qnZMIDsmd8KOH3BepLr+TvWqdpTn4v3YsYzn
F7JyPteU8TlnDd86eHtzWTFbzfdy9JmolO+J2S2GbCrmKCttI5WtlbaRZONI5biF7CGPRXRx
H6h+PV7pD3UtJv15KB1raWnR7SpsNZozkZPC65tlsKtqxwXUNlm+hBdMp+PjqL/lWtLpdFqM
6wwpW5zLNvST7KP2ZAs/Mso2q1foOCvINs2i+mW9Y9r6yOe6VpaxmthYzCGqPumkT1aA+qRT
O7N92FguyVUbB6Kz1NNYX8uwYT77TJzraJ+J+4SZhrZ0Rk+XSbs9NufnVJtnBWnzLNI3GD3V
sazEQIt6XPWTQPJC/jt0jyaU3UrrG7UN8twg0tVG5dPJj7NoLbWIx7zVfIUpVut2Ht/y+Z/5
PN6t5vGukOOgeCfmkT60jaL6bJS3Ut6qlLMqyGt82aK9sZFN/VQQYD9lkz85r9LY6Mp4ZmzL
1RobBUHavID0dYbB2IjT3L6+jHOC4zAZG8toLlXHRja1QbRls4+xYb4isPMj7lJtY6cy4HET
5aOcOnbU48a6zMZdZ8abk/p+Q4B97yQfreoB483Ylqs13jYEafMNpG9VGIy3Qho/q+hZw8Mm
420VrTvV8eakNoi23KPPV4V8HBXwEeS+RzH6f0f9uYpsuz1A21aRD9T0AH82tuVq+fP2IG2+
nfTtiJ6++r2GdNgRoA41ZKvaHtDvxrZcrX7fEaTNd5C+tWEQxz6huPQCZyfnxyZx7AWSqcax
GmqDaMt6zl18TSDWCSX8PwfPlfE/8/jaYK6+YijQVwrj9FXDAr4Ov8OzTjBbI5jN+dEmsdFG
NlXLy2c9HY2btdSXdQH2ZS35XH0PGD/Gtlyt8VMXpM3rSN/6EMbNetLhwwB1qCdbNfaAfje2
5Wr0e7B6Cps3kL6NYRA3R9P91nucC+xKv5HnRhviZj21QbTlef1+zM7u1u+dRLQs43dQa/Sn
sGt5rEzj2/k8bpaxGex2Pa7OYUu59Gn8eKYeYYv0u68pHBk/+xruh4xxVR6LMJyPMZSNMYmp
6vUxJjFafSbiy+5q36j5fvSsWr6/itdlpPI/F5fkOYtySirtxUWOyRU5lfbZixYvm20vzrfP
da6cPtu+sqS4oqzAXpJT5mCxbAS37VKuwAJbm38JB3Ip73Fdhne6XZU0uk+QScYXmXYkMPab
gdwH5iycK0rb7rOweKv7GbnXO2d+YBhvTwa/vsUo5KiNVb9m9Txrle9K5XuPAcpzcXGvfIt+
ZDAfi1Fc4iWOsMY7eh/JZ/lqGsy5Va9Noxpu03sllt43D1DGsK80U/d8K5uulJ2h5G9Q8q/q
TyLkW4bp7dQ+g13Zs2q6oZ3zs6i9Gm/VCU+7ZN9ZFJ+W7y+iFNum61+LWAj9Bast3iPHpr/F
ENfoDmtWmnu55lVavLFZWF5Y5lxT6LDnFq9ek1PiLC0uKlUu9qRo97642KJfrFdpXtAaaEFb
oAUjAi0YGWjBqEALRgdaMObKgnPZHVxzC/faR/rigykkpJ6SXCFO93uWtFaaEDRlr1Vr1Ww8
4OjHdl3/1ek7w3Urg+L93jcnSlvaJjzNx7lWzY1Nmbxe9tT2U89HHPJF/hCStYOVK2FZBPiv
aUk+N9Tdf37Ui7ct++gB/TOtr11sSJtozSA60742p7DcETrRc5/68E8j/3ncTLdoTRFtUURf
IxaAYtVaVlyWU+g1uXc2RctWX9Mm2momutS5ssiZ78zNKSoLqQK81YpomyJafPZyt7Mwz15W
ucZhX1uaZp9fUjbj9hLHnKXZ0+yZZY4ie/6U/KAFZvy4Keboe9TqpDbREUGLtk+yLypeudJZ
FLDsf/r5+p+mU6sV0ZEG0abCOqnFP/x/D31Goi2K6ChF9LDADB6c6Lv+ZVRa31WTpJsNaxMd
HbToNnkBiU6dMem/s4+fkgZXRMcYRIfc4LeN/cWp5nzZaosiOlYRPaorDH7kvaQ7nvq3/0sh
hY1qE90naNFBGryleM7CX/x9vzS4IjrOIDrkBl/8f+v/uCFmObXaoojuq4gWX459i9/zF02e
W1xSWllW4LDPZZ0V7Z7zTz9KBh/eJrqff9GZIRatKaL7G0XnlJQVOsrKeHtDI/rBmOkbXtgy
Q3q4InqAL9GZIRLd99L1J+x/PD/LLdqqiB5oEL3UXvpQeU6Jg4VKdGHi1He1O2VIsSmiBymi
rxUP/eyZJcUrclY4C51llWICLSovLLTPY52bSfIq5bi+tk304PZE5xSWOUqKcsqcax1cg+BF
v6K72T3U15oiOt4geikXUixErvFo4HSUso6L9l4qWBTRCQbRdzjz8x0ljqJch91ZZJ/97dtz
WedE/zniW60L/ryYWm299jX9IY9xHSxFq2thmQK7whL0Fdagr4BW0ApaQStoBa2gFbSCVtCq
t2j1acbN1e7nTTH6/cqi4qJCfoeQ7yyTHwLM9fPy3+LjuXbIbiu6yTuSW+jncxHcjhpz6S//
xc9qEo0vT5XU9vJf3Jjfpv+ITr5YHUQ3rr7eobzueaWulo73c8VMNk33jEV0UyhYTHmRMpX8
EsqLPnxV/2GpfPqsXv21iRRZo+x743kpxde7JSlZ9r3xfGc+JfC8h4lWfFg88tbLzXmoXNyd
F/n49kDzukB0WHbOikKHGCMljtLywrJSgyR9oCQyu8XrQqHd7eUlax1meiWyaGu7pdveTfSW
bwrYqF3s/YN4D4uE1FPTcasSNaPc2/uVc/6SxeuRv4WJT77cs4U6f4gAQ/NOxpYMrwp2rRD7
r7788mvp3jUnZpjsG78FMKb2zpu9GUpvr4QMjPKDNnVOZD5mfaasJ+6sTlXWlnI7aQCLFfkl
yuwur55XXaLYVq9Nb5HWvs56OfE6Tdj0d/7bplpJz1fSXwDFJf/wd48+6nL/War/vLJt1q5O
V1su97+tX3vvzHunTnSsWzN+1cR7JvSNZZn6dDNn3ZriIkdRmTOnUH7Y6pBT/i/cFvl3/Xvi
7AJnqeeUPTenyL7CYS/IKcmzlxWLZXGaPbuk0p5fXlrqLFppr3DyisTbE2eRU69b/wTCnl9c
Yp+fxn6pm1W0YAn7pfRtJCQkpG6SlrqDY5Z+b3DvVPHb22yvvyxGpje9/qKrD+jeVxPBWQ+B
rM9Hf1gwy53dzJpj3PNQdk45Oyli+LJIttJ2oOKl55sqeAi/bsr8SfdMvqe3Gv26Kat6t9fN
Nzso/OWO4vIVhWLmzXaudjCPvyxYNH7ahN7rM4VFovmr4C9ISEhI32wK0e8gu3M1FgPr9e89
t7Jt7AF+R57MucnH2yrPKpCSessc/BXzMpZVx5JGi/Tt3aar13tMj97b9guMV19+eWe6nrMP
HPjP6bX6EwmLHwtoPvU1JnXd3FX1LiM7aLzuxbCD/oQpE3ZgVl73kl5thzszvl/tjlIv8ujk
lpFPpV6PYOwCP/CRbh9vWeKnEf6eKoYsvVQ9SA+/4odyI5jF8zg8tb0Hm33TPKao0Q0TlNSM
ndVi+x9sAEmUr0jtBY7CNX6uvCpGwa36N5YyRP/fsnTOnfcrPX2/u6d7y636zoy/ef5Gafm3
SHw/w9dPN+cx99+5fOVPN0WQWSSD6tQQj6drb4ooyrz5sP4GZpGXaM0gelWoh/K//nLul4n/
9EcSrTHvn26qosUDwJCKHv5a08g79vXLcIu2MO+fbqqivR00FK0umjhw730RJNqqiBaLZyk6
xt3XoRV93/pprz0zThqcxfgWzfs6tKK/853T95W89mvZ1zHeP1iVorWuaPX+xn/ZkfXDP7xH
rda8f7Cqig55q7emRDw8+He1JFrTvH+wqooWHh5S0eNPXyiIn3aZDG7RvH+wqooOuYdPrivr
e92z50i0VfP+waoUbemKvnZe+N9/LZl6Rnq4xfsHq6rokPf1scgvxvzL+KPSwy3eP1hVRYe8
r9UfMfK+tnj/YFUVHfK+9hZttZiHFDEL3uFYWeJwlOpfjPJMXvHqkKwE4ymQsjjfoj0/YgyV
6NQF877YOvYz2dd+RM9eUVpcWF7msGeVrxZNz9IVKe246PWfXr7OUfKVHNd+RGdVpq1joRT9
9rvvvHhDnPRwa5z3j5OF6MVtq5TQih7x2CdLpq1yR7PFXquUvgbRfFyHVnRZ6c7Z2Q8cI9Hq
KqWfQbS+Sgml6F0/mZJTY/+KRKurlP4G0d7jOgSi31o/+D/fefAMiTZbpSw2XaWEQPSzv/7w
30+ukAY3W6UsNl2lhED0RO2fGpfd/Ibs6xjvn2RL0VpXtPqeG/9z5HW/eF+2WvP+SbYqOuSt
fuKuLyqHZv1Ztlrz/km2Ktp75gqB6HPr12w4q7VKD9e8f5Ktig65h8c6Hv/DxrqT0sM1759k
S9GWrujrn9731/T+mX0yqK8t3j/JVkWHvK/H3vbob4e/+DfZ14roIQbRIe/rIcXvfHfBUUat
Vlcp1xhEh7yv7Y/cm3lx5f/KvraYhxQfq5TOiVZXKYtNVymLfa9SOid6b0TGxUGrT8u+9iM6
5KuU7PSomMUr75F97Ud0yFcpP//d//9/vvdvA0m0ukpJJDfL7KpVyidflP8yo9UdSDO9VilD
DaJDvkr526+Hf6/5xgMkWl2lDDOIDvkqpfF0yrcn9o3McItWVynDDaJDPq5/eOlw1ifbvqZW
m61SMrtqlfKtjwed/X7+LtnXMb5FhzyGHxp/7ZEbm16Tfa2IHqEYvEtWKaPP9H/ky/rdstXK
pHmtQXTIW/3Xl/4x7eCfPpKtVkQnGUSHfOZaf6HPvspZTHq4InqkQXTIPfzg89Yxf3nigvRw
RbRdEd0lq5Sak28m/MZ2Qva1MmmOMogOeV+vePNvzc1P/EX2tSI62SA65H3d//jX89MmDJR9
rYhOMYgOeV//PeHs8Zn/FUWizVYpmVdjlZJpukrJ7KpVyneGfmvxU9/9Uva1H9EhX6UkPzNn
4xNP/Q+JtvgRHfJVSvnHz35qfVjO1+oqZTS52ZKuWqW8/uz0z/++Y48ueonXKmWMQXTIVyn/
UjD6SbujgUSrq5SxBtEhX6U0D8z+LLK4b4ZbtLpKGWcQHfJx7bj57fOf5ttItNkqZUlXrVJG
lz26bmb9G7KvY3yLDnkMf2hk8sG/570p+1oRPV4xeJesUraW1OZ+d9jLstXKpDnBIDrkrU4b
9eV7Jw6/I1utiJ5oEB3ymSv92qjsz09o0sMV0ZMMokPu4afevmXA7/f/nVqtrlJSFdFdskrZ
aLvoWjrkgOxrZdKcbBAd8r6O/vbC78yt+UT2tSI6zSA65H09KOvmu//xpdGyrxXRUwyiQ97X
J4ff/vyK50bIaGYxDyldvkpZYrpKWdJVq5RnPp7wuy/ePCH72o/okK9Stv/T8+PnNtWRaIsf
0SFfpRRPGrbvjRm75biOM/90ziNa+a5HpsCusAR9hTXoK6AVtIJW0ApaQStoBa2gFbTqLVrd
TH+BYxw7ptf0afUDbMFaC/ug3OKli/y3CtWv+9hVSMH+W41C767+txrVffnvaSbSNzHyq/4E
1vbvksbSNTIlUXmjbdV/A1f9N1TF3yuU58cG8vpRXi2rTjfPmydVnrSD2h55TOou/6KnJzT3
QyT57816/oKnlhavesVxs3ZMVOp6UnM/FQpVO3zpKv5qqgFxWrt68CNae3rIYSB8VPyrmK9y
1vTRmKxDPNGUeY3ZdX8Q569MLvk/EhISEhLSFSk/P/9IeXm5a82aNQAAAHoJIu6L+K/OBw6H
49CWLVtcx44dc507dw4AAEAvQcR9Ef/FPCDnBDFPHD161NXc3Ozau3cvAACAXoKI+yL+i3lA
zgni/kHMFw0NDQAAAHoZIv6LeUCdE1pbW12NjY0AAAB6GSL+Y04AAACAOQEAAEAgc0JTUxMA
AIBeBuYEAAAA/uaE8+fPu/bv3w8AAKCXIeI/5gQAAACYEwAAAAQyJxw8eBAAAEAvA3MCAAAA
f3PChQsXXIcOHQIAANDLEPEfcwIAAADMCQAAAAKZEw4fPgwAAKCXgTkBAAAA5gQAAACBzglH
jhwBAADQy8CcAAAAwN+ccPHiRdfJkycBAAD0MkT8x5wAAAAAcwIAAIBA5oTm5mYAAAC9DMwJ
AAAAMCcAAAAIdE44deoUAACAXgbmBAAAAP7mhEuXLrlOnz4NAACglyHiP+YEAAAAmBMAAAAE
Mie0tLQAAADoZWBOAAAA0N6ccObMGQAAAL0MzAkAAAAwJwAAAAhkTrh8+bLr7NmzAAAAehki
/qtzQnl5uevEiRP6b9lgHwAA6D2IuC/iv5gH5JywcmX+J9u2bXMdP35cny8AAAD0DkTcF/Ff
zANMScuXL99TUVGh3z8AAADoHYi4L+I/Q0JCQkJCMqT5nAzOVE4Ex87RiAFKudH8wCST/bGc
ERwLHddou3v3bjaGb+Po3HCqT5a7gfYfowtk2SjGqscr1yVT3sXTKL6N5gyiY+LSIZQXaal4
X665rzvPy6vtrCPBVouWvJBl8XZmsRxWxEr1nIOVMCfLD8Juc26fVjFv3i3CZCx/+rSK2XoN
OaxQPzvP+oZ9nvXy4mVWYVGRt/Gjx/k2e/Ay63RRZEacfvwtUZplxIq2zOB/iHKa2Kl2I8q7
e0VPlnnV8/g+OyjOxWeKc9w23GitT0yraD0fHdNy7y0R4nKbQtlUWUecXk7k1/Bjf3x0X+Rm
rocok3hjHPto4Q0V71ZtXv41t51okzj+4xvi2NMN9WXimry1uvk9W7V/pe2tJrbfqsH2XWV7
oYQcFyuUcTFQyc9XxrIwWgKdsxnycznxVFf2oszMSH7xEp7fxYmhcok0lmOUcceofkEmxZJq
iisibWRfes6PV8pqnmhhnoQbpX/NiH6W9K8tyr43I2n7KOei8EWKZUL/2yzB6d8srtHagtlv
2SYf+kdfofN1Bv1T4yPZgXU3ssNVt7LUQZFs8uAotq98Bvti8xx2oPImfj6avXOXnU0YGME+
KprKPnn0VnbwkZvYB7kT2PvvnmZO51ds6pAYfi6NHaycweqXj2afH9jHPn7rDebIb2W//s4o
tidvLHt9wTB26rO/sqNNDez+FV+yTWMj2YvTYtkr0/uwp8dFsZ1vfcHuvu9ztrPuLDv56V9Y
5t1/ZncuaWKz5v+ezZizi6Wm/4ql3PwzNuL6n7D4tB+wfhNf5GNhqpo0TZuSlJQ0RWyJtMTE
xDSxJSarie+n8vKpYktM4uUniS0xUU18fwIvP0FsibHjxo0by7fjCfuo5OSU0WPcie9rw4YP
H3FtUtJIft1Ivjs4PiFhyDWJiUO5nKGaFte3X//+AwYOcictMio6Jlbro3mS1RaheSWL155x
PERp3vORGv8SPf60iyXRvhyX39Pc42yIMibVOWy4Ya5V57RszibOv1JdF0gncd3GnJdmFx1+
e7Y8F8tZcOUY0tMDum9W8ChZycfFbLaILWbL+DaKxoLYRlIciKZjMZSPbkfHYNYQe0z21ViW
qNSr2jGB7JjcCTt+wHmV6hJxfpTBjvJcvB878mDMFrJyPteU8TlnDd86eHtzWTFbzfdy9Jmo
lO+J2S2GbGqhtlmU/Ug6FklEK3lZNkI5FtHFfaD69XilP9S1mPTnoXSspaVFt6u01UROCmeW
wa6qHRcoa0BRfjQnnY6Po/6W551Op8W4zpCyxTmjbBakbE2RbVZvSpBtSjFpk1m9GtWXHGC9
snyKUu+Ytr73uV4uEf5uc/vzFKUdcn+AxzdcykRcnW6Wl0s6scaaTuNIBAvzedGu+44eTK6c
1eX/PSrl5uZWORwO14MPPuhatWqVKeK8vzry8/OrHnroIf253bp1666guLi4XbNx+VXiu4BH
HnnEtX79ei9KS0sDMntRUVHVww8/7KqurnY99thjHoQOgdqD61Alrt+4caPrqaee0qmqqgqq
23kbqsT1zz77rGvz5s2uxx9/PGi34XpXiWvFu7FnnnmmQ2735JNPVm3dutX13HPPddhtueyq
zlwvEr++qieNGfV+/Zyf+3Xv+7uOpDh9vhd8k/eO/6117t7xJq1z947qPCrXDpEm8/rFn//c
a15Pp7kjK8C5NZ3mwGzDvG6l8y39+1uM97CeNQU/Z5TNgpStKbLN6k0Jsk0pJm0yq1ej+pID
rFeWT1HqNZvXrYZ5PZvK9yO9xHy+yCBvkGKLBcpUrLYjk+5Xo9rxB+M6L5t0LgiwT7JJptOH
PxjXeVY/67xs2gYjW1Nk+1rnBdOmFJM2+VrnFVDfFQToDwVUv7OD/pBN/pBr4g/ZJv6gtkP4
w7QO+IOTdN4QYJ84SWZVCPzBSdtgZGuKbF/+EEybUkza5MsfNlDfbQjQHzZQ/VUd9Acn+cM6
E39wmviD2g7hD9d3wB+qSOftAfZJFcmsCYE/yAVSMLI1RbYvfwimTSkmbfLlD9up77YH6A/b
qf6aDvpDFfnDcyb+UGXiD2o7MuneL1h/qCGddwTYJzUkszYE/lBD22Bka4psX/4QTJtSTNrk
yx92UN/tCNAfdlD9tR30hxryhx+Z+EONiT+o7RD+MKMD/lBLOtcF2Ce1JLM+BP5QK+8vgpCt
KbJ9+UMwbUoxaZMvf6ijvqsL0B/qqP76DvpDLfnDr0z8odbEH9R2ZNJ73WD9oZ50/jDAPqkn
mY0h8Id62gYjW1Nk+/KHYNqUYtImX/qqz6ID8YcGqr+xg/5QT/7woYk/1Jv4g9oO4Q83kj9I
H5DP9L+nmb8DsATpO8HY4wmS+Sd6H9NZ3wlG9j4T2YH0RVe0f9830H5VthZCHxf1xhvaFIhd
5XcrVj/frViVdy5Sf/ndyp/8fLdipfGT3U57/k1rky3HkNFHM+ldjs3wjcU5P99Y4HlZaJ+X
qe8lq6ur/cYn0S2d8eUE6vuJhvGpvErxGp82H/5u8xFHjPUZx7sthPHO2JZA9FTf/3b0eWWw
Np9Ieqb7sLnxeaXNz/PKYG1klB2KemWb9tE3eqGsdxbVmx5EnwYaCyeaxELVPmosNPv+KVRj
MJ1kZl+lMdgybJhv/+LnOtqWRl5gpqEt4ajnE/SdWWOQeqrfPyhxwzLEJIZYA8wH4qsb+c5s
g69uJL8RYyPLx7N1o56h9tts6mtnD5g7jG3pjJ4uk3Z7bM7PdcbmBaSvs5v47TITv82mNhT4
uIfvar91Ul9X9QC/NbYlXP12A+lbFQZ+mxeA364ifVS/dVIbNlA9U1kaZ4buuzby4avpx1XU
9zU9wI+NbQlXP95O+nZEz1D1ew3ZqrYH9LuxLeHa7ztI39owiF+bAohfL7C277Nl/KqhNoi2
PKB/V+zQfxdjZ3fov4jJ5/GsjxLHZFyLIdkS21WMcbXkH/U9wNeNbQlXX68jfeu/wRhXT7Zq
7AH9bmxLuPZ7A+nbGAYxbl0AMe49ilFqjKunNoi2LOdM1ldp17Mb+X/XK+s0myHO+Vu3mf0G
x2ryjknq+QQ9B5Nl5f2Puu5MoWdN8pon+X6qXmeLUsr823hfSe0vXzqJb/QHxGnt6tHRb/TX
9NGYrEP4jMzLb/TF+StTz/xGHwkJCQkpNCk/P/+I+K0R/q4lAADoPYi4L+K/Oh84HI5DW7Zs
cR07dsx17tw5AAAAvQQR90X8F/OAnBPEPHH06FFXc3Oza+/evQAAAHoJIu6L+K/+WzXi/kHM
Fw0NDQAAAHoZIv4b/53j1tZWV2NjIwAAgF6GiP+YEwAAAGBOAAAAEMic0NTUBAAAoJeBOQEA
AIC/OeH8+fOu/fv3AwAA6GWI+I85AQAAAOYEAAAAgcwJBw8eBAAA0MvAnAAAAMDfnHDhwgXX
oUOHAAAA9DJE/MecAAAAAHMCAACAQOaEw4cPAwAA6GVgTgAAAIA5AQAAQKBzwpEjRwAAAPQy
MCcAAADwNydcvHjRdfLkSQAAAL0MEf8xJwAAAMCcAAAAIJA5obm5GQAAQC8DcwIAAADMCQAA
AAKdE06dOgUAAKCXgTkBAACAvznh0qVLrtOnTwMAAOhliPiPOQEAAADmBAAAAIHMCS0tLQAA
AHoZmBMAAAC0NyecOXMGAABALwNzAgAAAMwJAAAAApkTLl++7Dp79iwAAIBehoj/6pxQXl7u
OnHihP5bNtgHAAB6DyLui/gv5gE5J6xcmf/Jtm3bXMePH9fnCwAAAL0DEfdF/BfzAFPS8uXL
91RUVOj3DwAAAHoHIu6L+M+QkJCQkJAMaT4ngzOVE8GxczRigFJuND8wyWR/LGcEx0bHNdru
3r2bjeHbODo3nOqz0PkbaP8xukCWjWKserxyXTLlXTyN4ttoziA6Ji4dQnmRlor35Zr7uvO8
vNrOOhJstWjJC1kWb2cWy2FFrFTPOVgJc7L8IOw25/ZpFfPm3SJMxvKnT6uYrdeQwwr1s/Os
b9jnWS8vXmYVFhV5odNxvs0evMw6XRSZEacff0uUZhmxoi0zSHdN7FS7EeXdvaIny7zqeXyf
HRTn4jPFOW4bbrTWJ6ZVtJ6Pjmm595YIjWwnKZsq64jTy4n8Gn7sj4/ui9zM9RBlEm+MYx8t
vKHi3arNy7/mthNtEsd/fEMce7qhvkxck7dWN79nq/avtH2Eie23arB9V9leGEGOixXKuBio
5OcrY1mUT1D6Tc3P5cRTXdmLMjMj+cVLeH4XJ4bKJdJYjlHGHaP6BZkUS6oproi0kX3pOT9e
Kat5ooV5Em6U/jUj+lnSv7Yo+96MpO2jnIvCFymWCf1vswSnf7O4RmsLZr9lm3zoH32FztcZ
9E+Nj2QH1t3IDlfdylIHRbLJg6PYvvIZ7IvNc9iBypv4+Wj2zl12NmFgBPuoaCr75NFb2cFH
bmIf5E5g7797mjmdX7GpQ2L4uTR2sHIGq18+mn1+YB/7+K03mCO/lf36O6PYnryx7PUFw9ip
z/7KjjY1sPtXfMk2jY1kL06LZa9M78OeHhfFdr71Bbv7vs/Zzrqz7OSnf2GZd/+Z3bmkic2a
/3s2Y84ulpr+K5Zy88/YiOt/wuLTfsD6TXyRj4WpatI0bUpSUtIUsSXSEhMT08SWmKwmvp/K
y6eKLTGJl58ktsRENfH9Cbz8BLElxo4bN24s344n7KOSk1NGj3Envq8NGz58xLVJSSP5dSP5
7uD4hIQh1yQmDuVyhmpaXN9+/fsPGDjInbTIqOiYWK2P5klWW4TmlSxee8bxEKV5z0dq/Ev0
+NMulkT7clx+T3OPsyHKmFTnsOGGuVad07I5mzj/SnVdIJ3EdRtzXppddPjt2fJcLGfBlWNI
Tw/ovlnBo2QlHxez2SK2mC3j2ygaC2IbSW2JpmMxlI9uR8dg1hB7TPbVWJao1KvaMYHsmNwJ
O37AeZXqEnF+lMGO8ly8HzvyYMwWsnI+15TxOWcN3zp4e3NZMVvN93L0maiU74nZLYZsKpYe
VtpGKlsrbSPJxpHKcQvZQx6L6OI+UP16vNIf6lpM+vNQOtbS0qLbVdhqNGciJ4XXN8tgV9WO
C6htsvwTvGA6HR9H/S3Xkk6n02JcZ0jZ4ly2oZ9kH7UnW/iRUbZZvULHWUG2aRbVL+sd09ZH
Pte1sozVxMZiDlH1SSd9sgLUJ53ame3DxnJJrto4EJ2lnsb6WoYN89ln4lxH+0zcJ8w0tKUz
erpM2u2xOT+n2jwrSJtnkb7B6KmOZSUGWtTjqp8Ekhfy36F7NKHsVlrfqG2Q5waRrjYqn05+
nEVrqUU85q3mK0yxWrfz+JbP/8zn8W41j3eFHAfFOzGP9KFtlLIOjiKdbLSV5awK8hpftmhv
bGRTPxUE2E/Z5E/OqzQ2ujKeGdtytcZGQZA2LyB9nWEwNuI0t68v45zgOEzGxjKaS9WxkU1t
EG3Z7GNsmK8I+L0flWobO5UBj5soH+XUsaMeN9ZlNu46M96c1PcbAux7J/loVQ8Yb8a2XK3x
tiFIm28gfavCYLwV0vhZRc8aHjYZb6to3amONye1QbTlHn2+KuTjqICPIPc9itH/O+rPVWTb
7QHatop8oKYH+LOxLVfLn7cHafPtpG9H9PTV7zWkw44AdaghW9X2gH43tuVq9fuOIG2+g/St
DYM49gnFpRc4O8VzWpM49gLJVONYDbVBtGU95y6+JhDrhBL+n4PnyvifeXxtMFdfMRToK4Vx
+qphAV+H3+FZJ5itEczm/GiT2Ggjm6rl5bOejsbNWurLugD7spZ8rr4HjB9jW67W+KkL0uZ1
pG99CONmPenwYYA61JOtGntAvxvbcjX6PVg9hc0bSN/GMIibo+l+6z16jv2hSdx8j/RW42Y9
tUG05Xn9fszO7tbvnUS0LON3UGv0p7BreaxM49v5PG6WsRnsdj2uzmFLufRp/HimHmGL9Luv
KRwZP/sa7oeMcVUeizCcjzGUjTGJqer1MSYxWn0m4svuat+o+X70rFq+v4rXZaTyPxeX5DmL
ckoq7cVFjskVOZX22YsWL5ttL863z3WunD7XvrKkuKKswF6SU+ZgsWwEt+1SrsACW5t/aRb3
VvW5q/E9gkb3CTLJ+CLTjgTGfjOQ+8CchXNF6Q/KLSze6n5G7vXOmR8YxtuTwa9vMQo5amPV
r1k9z1rlu1L53mOA8lxc3Cvfoh8RBojjEi9xhDXe0ftIPstX02DOrZ7RfZveI7E0pocp49dX
mklfSbyqayS/mJhFcjQ2k53w1CltZlF8Sb43iFLalK5/pWEh9BebtnhPz9r0twfiGt1RzEpz
79K8Sos3JQvLC8ucawod9tzi1WtySpylxUWlysWeFO3eFxdb9Iv1Ks0LWgMtaAu0YESgBSMD
LRgVaMHoQAvGXFlwLruDa27hvvdIX3yohITUU5IrxOl+z2RjpQlBU/ZatVbNxgOOfmzX9V+d
vjNctzIo3u99U6C0pW3C03yca9Xc2JTJ6zV9urQFsPSQKbArLEFfYQ36CmgFraAVtIJW0Apa
QStoBa16i1Y3Z3xabdEfzj3AFqy16A/7VB2MH7P25oeU6r58kCweUKofSCcoD+RjmfeHwfJj
a6Nt1Zc/6ssD8YA+z48N5PWjvFpWnW6eN0+qPLMff8ljUnd5P/wE/ThNvmiRPiM+WFbrFcfN
2jFRqetJvp8awnb40rVE9Eec1q4e/IjWnh5yGAgfnc7cH72v6aMxWYd48SPzGrPr/iDOmzyp
kP8jISEhISFdkfLz84+Iv4wQf+kKAAD0HkTcF/FfnQ8cDsehLVu2uI4dO+Y6d+4cAACAXoKI
+yL+i3lAzglinjh69KirubnZtXfvXgAAAL0EEfdF/Ff/0Qpx/yDmi4aGBgAAAL0MEf+N/+Bp
a2urq7GxEQAAQC9DxH/MCQAAADAnAAAACGROaGpqAgAA0MvAnAAAAMDfnHD+/HnX/v37AQAA
9DJE/MecAAAAAHMCAACAQOaEgwcPAgAA6GVgTgAAAOBvTrhw4YLr0KFDAAAAehki/mNOAAAA
gDkBAABAIHPC4cOHAQAA9DIwJwAAAMCcAAAAINA54ciRIwAAAHoZmBMAAAD4mxMuXrzoOnny
JAAAgF6GiP+YEwAAAGBOAAAAEMic0NzcDAAAoJeBOQEAAADmBAAAAIHOCadOnQIAANDLwJwA
AADA35xw6dIl1+nTpwEAAPQyRPzHnAAAAABzAgAAgEDmhJaWFgAAAL0MzAkAAADamxPOnDkD
AACgl4E5AQAAAOYEAAAAgcwJly9fdp09exYAAEAvQ8R/dU4oLy93nThxQv8tG+wDAAC9BxH3
RfwX84CcE1auzP9k27ZtruPHj+vzBQAAgN6BiPsi/ot5gClp+fLleyoqKvT7BwAAAL0DEfdF
/P9/7H0LYFTFufCcfWWzeT+AyMvlJQ9h2XcSiiRRCKCAwUR8FDUh2cBqSGKy4SEYV+sDLb2l
cmttb9uf29ZKW9v6916ttqCx2upta+srytU+0PZaarVSRf9ba80/M+ebPXPOnrN7NtkgJDPw
Zc+cM49vZr5vvnl+HxJOOOGEE044jbsAQy0GLwY7BjcGCaCYCzcbvzhbx38WhqkYLPBegt/H
H38czcG/+fBtCqTHwoXBfyNEYGFzEIrP4+LNhOch7GbgXyeGUnhHok6EZ+IuIvvlkhzvPRye
L+chyNhqkWauRY24nI2oBXWiXvoUQT0oitozqLcV5/m3r1q1hFQZag/6t9fRFFpQB/26ynq/
e5X1wws3WEmNkmcbfnsM/zaVbbAGSZBQPn3/AAmNal2kLCH8h4STiCcuAwkvtwp1llXxVdiP
jpBv5Q3kG64bXGknbvZvP/GeM/f4ZUvsJLqNg5iXpZFPw5HnbvzumRued+zFeJAwFZX56Om1
4e0/7t+78SNcd6RM5P03wvno9mcPx0ictm20+hO/fPuyurfq1P0+SdT9aNU9QYLxxSaOL0q4
5ws4XiaVNgG+2TTP9RjKIa2mdQ0NDhx5PX4ewJAL4SqAl3M5vkOQPoEG6Evi0K8Qdyv6a+L7
PC6slOgt9B0ho5qPEEChpeYjC+dXw5nwewOGDwgtQl9G8F9qyQz/N0kcSenMfob2GODvTMLZ
p8F/YbkDvbSjEr3S/wm0sNSBFpXloOf7QuhPe1egl3ZW4e9O9NDFbjS/xI6e7vSi39zwCXRk
VxV6onU+euzHb6No9O/IOzEXf/OgIztD6PDG2ej1l55Hv3rgfhRpP4EeuXwGeqrtLPT9NZPR
W384il574Vl01aa/oj1nOdAX/C70pWAeun1uDnr4gT+hS654HT186B30l1d/jxou+R1auf4F
tOyCX6DQigG0sOaHaFb1d9HUwD2o3PMVVLjgC5gXvLyTJGnx9OnTF5NfAE9FRYWH/AIs4h32
L8ThF5JfgLNx+LPJL8AC3mH/fBx+PvkFOGvu3Lln4d95AO4ZM2fOmj1HdtgvTZ4yZeq06dPP
xPHOxN6y8gkTJk6qqDgD53OGJOUXFBYVFZeUyk5y5DhzXVKelHBWm11SOYvKp+WHHEktj/j+
ryJBTwNoOvgZX94kyXw2keNJXoZN0chaXqY1YdiD4TuQ1vuAE4l3a8vddZ2vPFjHvrkwrEnm
IeqaKW1ux73kTswXdWgduhBtwL85wAvk1wH9gBPe5cKzMw2OmYwhntLx831ZBZcuX48ToB5n
jqAen8BwANIi/fwMTT2yb+Up6hF3xmgt6sOyJoZlTjf+jeDytqIutBX7Wqgk6sU+It1yoU4t
UDYL53fAOweAk3tmYe3cO/sotwFP1/O49uDHYoyez4B3x48fp/XK6moBhlkYlmnqla/HNdwY
kISfjaEG3s+F9mbfo9GoRTvOYHmTb9q8UYZ5S1zeeunOyrBMs3TKpJeuBOnNNJkuCz+LS3eO
0vaG4+UeQu82mZ4Xc+Vg/uIEbQxxgjheo/fMhnRkjBUEPiKdhb5cdFPaoZ1JslRn/8eUa21t
7Y9EIkNXX3310DXXXKML5HuqNNrb2/uvvfZaum63Y8eOJOjq6kpbbTj/fnIuYNeuXUO7d+9W
QW9vr6lq7+zs7L/uuuuG4vH40I033pgAgoPZ+sA49JP4t95669Btt91Gob+/P6Nmx2XoJ/E/
/elPD+3du3foU5/6VMZkg/HuJ3HJ3tgdd9wxLLK75ZZb+vft2zf0mc98Zthki/PuH0l84nD8
/rHEM/x8/d0U83X1/G44Lp/KewIf59zxv6WRzR2rpJHNHXk5ysYODh25/sH3vqeS6zUgOxpN
ytYakIFNGrluhe/Hi4os2jlsYkyBv2nzRhnmLXF566U7K8MyzdIpk166EqQ302S6LPwsLl09
uW7VyPUmCF8IeBF5vk6TXylXF2s4UcyXowHmqzlp6EE7zmsCnLeYbJMmyDNqQA/acZ41xTiv
CX4zyVvi8jYa52VSplk6ZTIa522Btttikh62QPrRYdJDE9BDqw49NOnQA18OQg/+YdBDFHC+
3mSbRCHP/izQQxR+M8lb4vI2oodMyjRLp0xG9HA9tN31Junheki/f5j0EAV62KFDD1EdeuDL
QeghMAx66Aec7zTZJv2Q5/4s0AMbIGWSt8TlbUQPmZRplk6ZjOjhTmi7O03Sw52Q/v5h0kM/
0MNndOihX4ce+HI0wNwvU3rYDzjfa7JN9kOeB7NAD/vhN5O8JS5vI3rIpEyzdMpkRA/3Qtvd
a5Ie7oX0Dw6THvYDPXxNhx7269ADXw5CD6Fh0MNBwPmQyTY5CHkezgI9HGTziwzylri8jegh
kzLN0imTET0cgrY7ZJIeDkH6h4dJDweBHn6oQw8HdeiBL0cD7OtmSg+HAecnTbbJYcjzuSzQ
w2H4zSRvicvbiB4yKdMsnTIZ4cuvRZuhh2ch/eeGSQ+HgR6e1KGHwzr0wJeD0EMl0AOjAbam
f5OkvwdgyZB2MqmPmyHPQdiPGSntZJL38zp5m2mL0Sj/8x9D+fm8pSzSOEm3XFMmM/XKzq1Y
U5xbsXJ7Lgx/dm5lMMW5FSvwT1Oa8twnKXkzHtLSaAPs5dg0ZyzeTXHGQqyXZXe9jN+XjMfj
Kfsn0iwjoeUJ0PYLNPzJbaWo+NNmQO82g35Em56W321Z7O+0ZTGDJ7//O9z1ykzrfAHgWWNQ
59r1SluK9cpM60ibdzbSZWV6Hs7oZTPdZZBuTQZtarYvXKDTF/L1w/eFeuefssWDNZBn00ni
weOTJxvTF/423LI8hwOcoynLqYjnzXDO7LkM8eTPP3D9hmWiTh9iNflshlZvxZ46Da3eCnRD
eKPRYG1di2e26bYJ2jo6BmSHtiwjwXNIp9yJOsffRlLnWwDf6GlCtxt06LYJyrDFYA4/2nQb
hbbuHwN0qy3LqUq31wO+/acA3baZoNtrAB+ebqNQhushHS/yYAhR2rUBDZ9MOu6Htt8/BuhY
W5ZTlY7vBHyHg2e22n0/1NXBMdDu2rKcqu1+L+B78BTov/aY6L8+j5Tz2az/2g9lIGVppueK
I/RejBstpzdi2nF/lsf1Y6xfy4W8GdhOYh93EOjj8BigdW1ZTlVaPwT4Hv4Y+7jDUFfPjYF2
15blVG33ZwHf506BPm6HiT7uUeij+D7uMJSBlGUjhkV0lBZAlfhfgBun2TT9XKpxm94dHKvO
HhPD82ZYB2Nh2fyHH3fOgrUmFucW7F9I0zzOhdI/G2/k+PYywomc0S/Ol9LiMdwz+t15EmJp
EJphz+yMPvme7MbmGX3hhBNOOOGy49rb239L7hoJXUsCBAgQMH6A9Puk/+flQSQSefmzn/3s
0B//+Mehd999V4AAAQIEjBMg/T7p/4kcYDKByInXXntt6M033xz69a9/LUCAAAECxgmQfp/0
/7ytGjJ/IPLi2WefFSBAgAAB4wxI/6+1c3zixImh5557ToAAAQIEjDMg/b+QCQIECBAgQMgE
AQIECBBgRia88MILAgQIECBgnIGQCQIECBAgIJVMeO+994ZefPFFAQIECBAwzoD0/0ImCBAg
QIAAIRMECBAgQIAZmXDkyBEBAgQIEDDOQMgEAQIECBCQSia8//77Qy+//LIAAQIECBhnQPp/
IRMECBAgQICQCQIECBAgwIxMeOWVVwQIECBAwDgDIRMECBAgQICQCQIECBAgwKxM+O1vfytA
gAABAsYZCJkgQIAAAQJSyYQPPvhg6C9/+YsAAQIECBhnQPp/IRMECBAgQICQCQIECBAgwIxM
ePPNNwUIECBAwDgDIRMECBAgQICQCQIECBAgwKxMeOuttwQIECBAwDgDIRMECBAgQEAqmfCP
f/xj6O233xYgQIAAAeMMSP8vZIIAAQIECBAyQYAAAQIEmJEJx48fFyBAgAAB4wyETBAgQIAA
Aelkwt/+9jcBAgQIEDDOQMgEAQIECBAgZIIAAQIECDAjEz788MOhd955R4AAAQIEjDMg/T8v
E/r6+obeeOMNepdN1I8AAQIEjB8g/T7p/4kcYDJh8+b233zuc58bOnbsGJUXAgQIECBgfADp
90n/T+QA4tzGjRuf2r59O50/CBAgQICA8QGk3yf9PxJOOOGEE044jbsAQy0GLwY7BjcGCaCY
Czcbvzhbx38WhqkYbPBegt/HH38czcG/+fBtCqRnge9h8N8IEVjYHITi87h4M+F5CLsZ+NeJ
oRTekagT4Zm4i8h+uSTHew+H58t5CDK2WqSZa1EjLmcjakGdqJc+RVAPiqL2DOptxXn+7atW
LSFVhtqD/u11NIUW1EG/rrLe715l/fDCDVZSo+SZ4HQM/zaVbbAGSZBQPn3/AAmNal2kLCHA
XSKeuAwkvNwq1FlWxVdhPzpCvpU3kG+4bnClnbjZv/3Ee87c45ctsUtQdwxiXpZGPg1Hnrvx
u2dueN6xF+NBwlRU5qOn14a3/7h/78aPcN2RMpH33wjno9ufPRwjcdq20epP/PLty+rerlP3
+yRR96NV96QSGF9s4viihHu+gONlEn4C1278cz2GckiraV1DgwNHXo+fBzDkQrgK4OVcju8Q
pE+gAfqSOPQrxN2K/pr4Po8LKyV6C31HyKjmIwRQaKn5yML51XAm/N6A4QNCi9CXEfyXWjLD
/00SR1I6s5+hPQb4O5Nw9mnwX1juQC/tqESv9H8CLSx1oEVlOej5vhD6094V6KWdVfi7Ez10
sRvNL7Gjpzu96Dc3fAId2VWFnmidjx778dsoGv078k7Mxd886MjOEDq8cTZ6/aXn0a8euB9F
2k+gRy6fgZ5qOwt9f81k9NYfjqLXXngWXbXpr2jPWQ70Bb8LfSmYh26fm4MefuBP6JIrXkcP
H3oH/eXV36OGS36HVq5/AS274BcotGIALaz5IZpV/V00NXAPKvd8BRUu+ALmBS/vJElaPH36
9MXkF8BTUVHhIb8Ai3iH/Qtx+IXkF+BsHP5s8guwgHfYPx+Hn09+Ac6aO3fuWfh3HoB7xsyZ
s2bPkR32S5OnTJk6bfr0M3G8M7G3rHzChImTKirOwPmcIUn5BYVFRcUlpbKTHDnOXJeUJyWc
1WaXVM6i8mn5IUdSyyO+/6tI0NMAmg5+xpc3STKfTeR4kpdhUzSylpdpTRj2YPgOpPU+4ETi
3dpyd13nKw/WsW8uDGuSeYi6Zkqb23EvuRPzRR1ahy5EG/BvDvAC+XVAWZzwLheenWlwzGQM
8ZSOn+/LKrh0+XqcAPU4cwT1+ASGA5AW6ednaOqRfStPUY+4M0ZrUR+WNTEsc7rxbwSXtxV1
oa3Y10IlUS/2EemWC3VKhh5W+HVwv1b4dUAdO7j3FqgP9s4+ym3A0/U8rj34sRij5zPg3fHj
x2m9krqajWEBhlk4vWWaeuXrcQ2UjYW/GQesgfdzob3ZWDIajVq04wyWN/nWpGkn1kbp8iZ0
pM1bL12C47IMy7QM0mfpzlHayHBcy8JYdeqYyBAenxrAp9EkPjVQziaDOmZDcr6OzeDM8NSm
d3zyZMM2I9+G22ZknnCOpiwjwXNIp9yJOsff+DpvzLDOGwHfTPDkeZnrAy38e55OzDyT/B+C
ORpBdh+Mb/gysG+lgKsNwtcAHTfCWGod7vO24hEmGa27cf/Wjv+24/5uK+7vOjBEoL8jciQP
fnO4cXAO4GSDXxbOygGLY1QX6XijCdppi8l2agJ6ip4k3hjN/kxblpPFG1syrPMtgG/0FOCN
fEmm9Q0Y3sAQ0eGNDSBLed5ogjKQsuw14A39EQGe+0EohXd2muabHINwPO/w77Vp6fHdSPgt
Cm1/vcm2jwKN9o8BftOW5WTx2/UZ1vn1gG//KcBvHcA/18Baw3U6/HYNjDt5fotCGUhZLqXy
qgPz0RbMQfIcRUv/w6XnfqjbO03WbT/QwP4xQM/aspwser4zwzq/E/AdDp5G7b4fcLjXJA77
oa4OjoF215blZLX7vRnW+b2A78FToB/7DfRLn8fwMFmn1enHPg958v3YfigDKctuDBfjMQEZ
J/TgfxH8FMN/2/DYoJ6OGLbQkcJcOmpYg8fhyxPjBL0xgp7Md+r0jTaoUz48W+sZbr95ENry
kMm2PAg0d3gM8I+2LCeLfw5lWOeHAN/DWew3DwMOT5rE4TDU1XNjoN21ZTkZ7Z4pnqTOnwV8
nzsF+s3ZMN96FNaxn9TpNx8FvPl+8zCUgZTlX+l8zI0uoXMn0lvG8Ayqm67CbsN9pQf/XoD7
zRgKofNov7oCXYRz9+P3DbSH7aSzr8UYWP9ZoJkPaftV9s6u+Z6rCZur06fy8XN1+mh+TcSo
3vm24Z8LYa2a7V+V0zwW4r8X9rRFO1t6drq7OiOLtrfsdNetu3BDnbur3V0f3Rysd2/u6doe
2+LuaYlFkAtNxXV7EUZgjU2hL0JAQ9w+7pBmT3e0nATzBOZY/8LcvRMQ+mkJpoEVa+tJ6Cf6
LKjcKq+Rq/ac8YvJuDy1OP5xbSav2VD8W9bEWivbK2X7HsXcujiZKy+hb8owL+bjHP+BgdTG
Q7SN2Fo+78owfIKmJsGOwlLaKi7g68kcDxu5czDFEspo5eq/jXuOcM/83vkBultkAapq1bSe
Npc2g10O5iJpvren+b4M6kZC56A3EnXA2tnC0T/b68jh2qGGniyxANDNWFt5Ih8b3fEgcShx
64XGHCGpQpO2WNvXEYt2d0TcrV1bu1t6or1dnb1c5IRzyn4S2UIj0yT1A1rNBrSZDWg3G9Bh
NmCO2YBOswFzkwPWo+UYcwvml10F4nCVcMKNFTeUZXdVYvhrBYEgcb4T0gnJhjsc+m4g8Pe3
V56qv6xTvEo9keHKogg8yeDbCUkGGye8vphI7ZuJAx/EnQlgo4sifVy3TIYwH8HwvT7bzf9q
RcnV9/5PLT3S9dEQmqhkLWmybnBva+noi2Qv60X/lKw/+ujcZXLWEpe1hct6EhkskhFurCvW
0qES7iN1FazUk5SsrXpZ90Y3d0bbo60tnbGsIoBLzWVt47ImR2QuiXa0uWM7uyPubb0e9wU9
sdB5PZEVFzX53Q2xSKe7fXF75jke/d6cI49CqacrWdszzvrcrd2hxhWLG1eYzjr+u2t/BFlL
XNaOlFmTbNxyPiPIGg14b4esLVzWOZqs9co50gqorbz92Ro5ayuXtdNs1iOogKPzNr4EWdu4
rHNNZJ3IQYuDyazjP7vgh5C1ncvaxWU92RyFZ5Z10aV5v/7Bd2Ywvp6sZJ2XcdZcfmayLny2
9qD7citkLXFZ56fMOk0Dm8n6N//4wn/M7HoOKtzCZV2gyTrrFH73yvdXX/ztM6DUVi7rQrNZ
D5fCvXd3PlxdwdraxmVdZCLrEVH4nc8+vX5pvgRZ27msi7msZ4wGhX/5jXbp1ivCIDTRDCXr
koyzzpDMmpoeGXqm9G4gM4nLujRl1lmg8BfXvblo3fPHGIVzWZdpss46hVcvsx6/6+H/hAq3
clmXm816uBR+3YR3G/K/uByytnFZTzCR9Ygo/BcVOcvXn/9N1odzWU/ksiYHV8/t6dreuai+
q6d3Z2xLxF2PRpq1PI14+wag8ClK1pNSZ92Q5awlLusKbdYtPbGOSCyGy5udrOu/5bm5e2o5
dCkWLuszjLJuyFLWL/7zwLcX/finbJTCZT1Zk/VF7t5r+1p6IihbWTde5a5++/d/ZqMULusp
XNbTyJ6Du6Gna1PLpmhHNLaTjMk7+zo63KvQCEYp8b7m5q+xjnSakvXUdFm3dMQiPZ0tsei2
CMYg86z/9u5//HNo6FI2VOCynqbJ+iKcSRfJsjuBQTTSi4aftXr2YeGynq7Jenm0vT3SE+ls
jbijne661ee1opFl/Yb/3WdesJ/HhgrTvkXXjbVTa5Y1P71mzlwMS8YxrBnHEFgJrARWAiuB
lcBKYCWwElgJrMYLVq/WOuNyCrl08Z6cPKrTOW3ET6r10snaROI02WjNQ16oeBcHpEb6AIhO
A3IX4gF4FnBqwWzYM1qv07pkQ2cesKP733O4SfbQ0Fz8cgfmOgv37j387tuSJWkbmZ0Pqu22
UNr4F3pLjbDUXI57XZpY+XSBijmGL03nBrILUKHZsK7tUULIXyUOyNfrAc+CxGk4C/f1Afha
FF+q6T0Yt0eQcoaIRMvnyse7XLn/KuYO232WZskfIOO7uH1QjXcmsn2QHh7N19mTZ8Cjzw6E
8gpdGGIsL3Y5X0LKoU4JKUoTJKQcBJU4ZuY3muhGRK1cQfYUFcTwcBlWEMmxoaW3t2VzxGQ9
5XD1xHBAaXBwpsTBxa/qm8QiN4GFNYGFNCIsJhgsdZtEqFwHIcuIEDLcuj3bva5r8+Zop0nM
pqkwux2wUo6KOEHmSjhPcvp6XVdnRxTnFI2xs791S5paNnVEiLcn0tvXEesFkXzMKoPeYne6
Ao4WX5wqHbpaJLN9WlJZzwDczonkfUIEjgmRTHqR+/DfkDQxwf7k3Q+kCWgzvQyhliI5mtNd
skjOoakoIjlftYc0NGRWJDO+qb1Bia+I5FzDrxaOb/mvcreWo8PJ7bCFphXJLOxEgIRILpTY
a/LwGA10ZDV53orhfqmbPocIAvajq8izB4PbMUCfCRrdVkTD3IThf6V99Pl8krbdnYjbnKfE
rc2X45KKrbUOJMKgYiXM0WIl/WecSvoHbfsSuHW7ZNzuIXjaH6LP5CDfM/kN9JncAHjGcZQ+
n0dwKCpera0uohHof3PiibjHixtWlyA39pJudcWO7q7OSGcs2tLBbl1Eru0j2zWd50Z6Y4tI
10zPy/W6ibvMS3+uoX+bWvro7/Kuvk24G9/sbopujTTG2jzuFT09XT2qCNWhOe7zujrbo210
K2Z1ZyzSg9M1m+rKrq62zkhvrywmYnKAyOaeSER+hR/aurbS12xzj3rqNvV2dfTFIu7Gvq0k
YCP9JOfauNOzY13f1k2RHroz1RXtjMkf6jpbOnZeF2kbFLVkopaU0UAON96YKmmHuRuBB8me
6BRUhBbg8D4shitx11GDSnG34kKfxO824XdbcJpx/Hwbfv4M/v55/P1eHOdBzPhP407nZTQV
vU87FXIDrRgVSQX4GwI9ZsxNQYrerSLoMBYgRWeFDyk6xSqhCyNDhBo4CuKAzs4FcT6JlPsf
m+A7wWELbKyTcHGk6LC4jTsW+BmIR04yfR7SJ0eL7gXciugEQO7YyOGbpyEsOQ3zMmzmkjjv
Q57ltORyWFLmIkkOz8aDTPOfQ9Nx5moO7ul3nNphstKDJg5M6XTM8szuwCrWGzWg4tWstxuQ
BhI9X9wysEob1yP3lIkwyJYchvRkXknuyXbRnnsPfSaDmyrL3YnnZ/CzNi5pj3g4vpLhdtQh
40ZwPloo40ye40UHVhmtfCTSqY2vLEG3Qn/t8/irfYu8Hq83VOn1LvJVhjzBRT6/zxP2eiqD
AZ/X4/P7QzhAMBz2umNd7oDHG6zGfn91KEj8+Kkq6F0UxWzfSXbm8atFAU+gKqR+5fcEguFK
ko835AuFcbreoM/jq66qHsQjcoQ+fUrgkqAa/W7hJtV8iu8WFIKy43+5mDkcmMhl8p2Mf93w
fBYmxzBmi5WoDF1Oj00RUSmhThxnO465mxv934jfP0hVTBVxUyQ74GVHypXHQqSosStHylWv
yUhRf+eGZxeSr30WAzmEuUNrK+EoF2HFy+G5CIQ5U3XXCfmSONshT8Lau5Gi/vRGCM/YOdeA
nQtNsXOK+WYyZ9+VhrMJdx5AAwmOaZYU7kGWA7qcfcAih6fjJOvRpDCketwWeaxDuHwPcDkp
YrGtOfF8HD9r45Kqq52ElHFVnpwXaa4D+fEEbu6C1JxN0olPQatKKAbdlJt8/oDXEwpVeX2e
ymrMRv6gH3NIJX7h8foD/mr80VsVICyBAwQqiTfsk/ko7K2uxnwX9MpfqyvDOLlApezDQX1e
r6e6Ohj0kdT9nlClzz9I70be/DHkrEcc+gzcrVp/4Bn4LhUDOzBr2DF92WFa4sBSWCbMmZgh
fPhLHSbeCykBI3QFTu0qHCaCmTHKMXAnfp+agZn8zuOm+MVIuQs9gWPgKfDOheT75EUQz8cd
eK0DpiIMfCE8F1EMlYOxV0GaJbDGYgPqiXIM3KlZOnMZMHCJKQY2sz6TzMn3peHkpVRGo4SM
PsDJ6GYdGU25yKr0AgPWAV1OrgVOJjL6bk5GuzkZ/ZCBjEYhWUbTnqLgaIJ7azkZTeR1OhmN
lhEZfSMse/j9mEmIXAxWh/2LMCf5Qot8Acwa+IM3RKRiILgogF+ECZdUVnuCRIoGsIgDoRiu
rNRKwEq/Rij6PFVV1SGSCZaXweqQp6raUx2qqhxEX8UofOnjRiMl/egz+/WqJT2e2e9TMbsT
s4sDyzqZuM/Ab6bD82zMPAFM5Mvx10tAWl+NG+kanE8PDredY/bdaaW1EykKEZi0LuOk9Rlc
uOmctJ7NMXuAk9bLOWl9CSetr+ak9TWQNonTw0nr7Ryz705Ia+MlTwtm48kGS57n9fVsi6Rb
5zzFyz46LKyebqrXOfO4rcefAfBbj11iXfG0W+f8kzV5nVNZe5RSvpO41X3Sgw1s47cetQpC
XMNc52RCurZXb52zwPAru0uk/SoPDxyJzXVlJbYdsLRxQxwJJavz0O6sTU+koGe+4LbNwaWD
CRWdEEvp/glKjjRbcPmasQxDliE4j1vSdWSwBTdIqy+X/26MWK4OYgUGiBWZQszUrtwgRajc
IKgxuuU66BYaoFtqCt3M9uwGqTaZaeniGBdgmqoAenLusbi88TdCOZdA37jwY72XzOyIjZBz
p7ec4yXTbNq+ku47rZwrZvKpV0/OMbk2XDlXklLOlaaUc2WGcq5Y0+VZocvL506yuFCyWYjU
J0jSyLPiNPKsxACpAp1+uDib8qw4jTwrNUCs2BRiWZdnxWnkWZkBumWm0D0J8qw4A3n2GMzb
bBg1klVDT9fVkdaYG8+1u9w+d0e0lwq21q7O3lhLp+ExlW+kEGvF41qs8cdUVnMgxMepC6wH
XZ3BMRWUGLZIKd8xsZbYwb1BVq+kP33L1+T+J5r/FsBT9kVVvqtVvmtUvg6Vb6vK16nydal8
3SrftSpfj8rXq/LFVL4+lW+byrdd5duh8u1U+a5T+XapfLtVvutVvn6V7waVL67y3ajy3aTy
fUrlu1nlu0Xlu1Xlu03l26Py3a7y3aHyfVrl26vyfUbl+xeV77Mq3z6V73Mq350q336V719V
vs+rfHepfF9Q+e5W+b6o8n1J5fs3le/LKt9XVL6vqnz/R+U7oPL9u8r3NZXv6yrfN1S+e1S+
b6p896p8B1W+b6l831b5vqPy3afyfVfl+57K932V736V7/+qfD9Q+f5D5ftPle8Ble9Ble+H
Kt9DKt/DKt+PVL4fq3yHVL7DKt8jKt+jKt+AyveYyvcTle9xle8Jle+nKt/PVL4nVb6nVL7/
Uvl+rvL9QuX7pcr3tMr3K5Xv1yrfMyrfsyrfcyrf8yrfCyrfoMr3osr3ksp3ROX7b5XvZZXv
FZXvNyrfb1W+36l8v1f5jqp8r6p8r6l8f1D5/qjy/Y/K97rK9yeV75jK92eV7w2V7y8q35sq
31sq319VvrdVvuMq399UvndUvndVvhMq33sq3/sq3/9T+f5X5fu7yveByvcPle9Dle+fKt9H
Kt8Q+NTTZDY2TZ4mT+SOrp4P7+TZ0ARussE0/PK3SWzctHdC0myITAfPg7mFweF7khDL5FwY
gOndKlmjWUFjq6FFMMVlukKY2aW5SFH/7UGKqcUlkAeb7k1MU0BnygISjDZQRYzpS+cCDPRK
V6xZ53al2YfLw3mXsut+aRSNqy5UmCiVtqbG/gTODa31OYB3BZzSwNYl383w6h85Ydcsqa/+
NVokVG+1qO4UEK5Yq3vPYC1MrNhGh5sLYU179S8/sfKo/dqc+GrR+dpNO2svfAlCXrXbuPjc
c/c2/jqhF3IMcbHYdcLUsSxwKpDFeiBNLLk/XavpcfJSXD9cm8n1w7XckY5U1w+1XWkR19kH
UyAncQckrbrImbl2p8VS79pdaERYZHjtTouQ3rW78IgQGu61Oy1mZq/dFeE8idmG1OY3VFJx
iWy8wPwdPKPSjvWe1Xhx8x5Jhl1c37RLLCaOiTt4CMbLX9MsbmrfscXNZVwYe0I2krc3SsmL
m5nu2dWmvINXl/IO3rmGX61wZUL/qw3Okunf3+PLmwMihWwJXaBzf28Z15tN42XaJom9Zqdm
EUo+B34VnW/L9+LIYbgBR23iJspRqThxIrUKTqT+t0TWb289n93luz/HnZQmWYGcZ7s7cf48
ntus3LVzKWnusMtp7qc389vO1zsVu69IPhVL5sVum/N8ls6BUiWdu3OVdIrtyemQZn9mkpeG
+TW9Z3hsNbvTOK/giHLPsCr5jD2xTNo9tZaGIesLa3IQxYGsW91d9MzqElSCW6QAg3wDm93v
kmVDb9/WrURiuOvdbtCgrzwkPtb1RNxtCYWLve6WrV2dm91bIy2dvW48lY1Fe2PR1paOjp28
Kvoa97wG91K31+MNzVcupmmUosYivTGS+bzl9Z0L3cvr2+anwqNRSR3nxTCKERw621p62txt
kW1Ren2vl8+dqSSd2wv5cS8S6LvntXb19ERaY5FRwUGu7hhtAndTT6QltpXEmrcpEtsewcOD
1q6Ovq2dvaSmIr3Rtr6WDve87dHYlij/qYnYGFjeEmtR0FHu8MVYor2kKCyK8h0uMs6jhgrm
DwqyEGSRTBbKYHQZNxgtsGhnFzug52an3QqxuJqC403H3ftcVIKqcB+4Cw5j3oLK0N04xDfx
t+/jbwOomr7/OxYbTmkmWiDlooBUgpZL8vvrpTy0R5qGB1dT0IAkC+UnpXz0vORG70qT8YyG
WEnjRWchdxCTWdWbghRdFtNh3mEHEV4CS2dV0FfnQD/tgnC3wOkGF+ztFMIy2jeRYp/g+5BO
AaznV4MY/Dv8klmXU5JvpJBwCyQ5LlmkCkjyO5LHckmOO4GWXM5nIr0rJdfwJBhqToHbqAOS
coXtSRCz5NvzkjxIJ0t+70rydzadqeUOmvPiul7nlopJcb2LBtqzOtVpb3qxxKJcSmmW5Esp
bnrJRL7CRUR63FmrXEHTXBAdDZe44mZXcENWBTeUo+CG63CV3pWygSKkXEFzcpdnnMoVuniu
iUun8+RT9fSaWjm5pkYEepPeSqYvEPQEab/h9foWYHdZpNfrqfYFyUWyUFjzpbHR7wkEqrwe
v68y6PeEQqGAv2pwVFPX7zyakHHnUZKojxLMnBMxIU7HRDoTpzEn6XSozpFSHMeL41ThOEtB
eVsNzqUOv6/H8ddwt1DIifKL6LWzJzRHdEoA5xLoIGzAgOza+HR454DrZew2zRx4V0wxkcOS
NLwQtxQ6GBsw+lKIOwHJV9GZtvo6iDsJGNKBFBPOdmDu9UAxhLkv0lxBqzNg7pUpmPsMgARz
+yX2ejw7STmctypxXUVSGHQA3tO7qRJhVnZAcXm93x/yVw5qX+izRE4SS2wZ1dq3UJNmVvzX
TlkgCOQygVu4nchdLpgEODPTAnYNyZ1rQHKrUpBcBUCC5M6S2GtBcgrJ0RtV3EXOboTwFI7d
4lrb6PP4wtWkK64KV4cGjT7ok11REtm1jWoLWCjB5WByeJCuslgNSI71fjmancjzDMhsdQoy
mwSQILPJEns93snsUnkxKbEq0YyHbyWJ87b8ZAs/+xe6/XiCdo6bjgsGzQXTJ7tpSWTXPKot
ko//lWCSY7ZjJ3DLb8w8TAlHZssNyOx8QWbDITN5M0e+H3o+7cHcmMwmQKXDxBkmwHhAOWj8
SZ+cSk4yOeXgfy4dcsoBcsoxcTqhGBNKXYY7NLoGo9NfJs5GYU9fQpNSbNj0SDKsh75wPXfa
VcDY2LDZobNhs0Nnw6ZGk6a8YUPersvChs2KlBs29Sk3bFam3LBZlXLDZrXhVzvwiP5XB2zd
6H/Ngcmo/lZQjWYrqBikZ5POVhALWwyQkJ4/S7xm2qRw/57Y0sCFPj8xNnYkqyIix4wfkgaS
tnnIn6VSMY1bg//8UgrS570SUVbWfH66wVK8oFY3zX1WJU23TUnzBVvz+SXoWvy0FYOyxNre
sjXaEY30Km+4Lt3djV/REDvrOrq3tFzcmVhwxkKhd0ukZ26ve03jcrc7vcVEU2HYIQS3OyNj
hIl4TWStvC0Sa4kSBYanCFKDoto/DqSUEVoNN0LbmqQkcnliza0U/3MjP6zMVUKXeSHu9HvR
InSArpjJ7gh0v3/E35zSIhSSqvAobA9StCkgpNxYLYW1W5Kjn1vJq4QZrgPJip+YcCEXdxZB
538AVury4Ch5Pizr/xHCF8JS/iKYHIQkOTybQKzQTCBYF7hGZwJhsguUiyivPNFlYnh20+WB
eFIXeD6dzyXvdNMxkuVoQkvbUctRQz1P2rhUp6OOvkZeoy55djuUNFHOwKoSuj5Ehuy+ANnk
Whtp6XQTcx2eRV5PKEy0mnmDgWo/UWlWGaZfmXJDpuOQqkgbzFI6+kS6DBkTqUT/WWAY74AR
cTFu3EkYpnNL07PhWdZ6moPJwqFDpEYK/23c0rKLW05mysv5RRGm/CcPiNIBRMo0nxIi9XEz
2CoIw4i03oBI1w6PSEeyAKF9Txc+rbWJpdUBK0rsv9TaatMTaRrFo0vlBafV7BlPyfCMNAhr
9dzObc1lWFp04T+UmPwy+SQUe8Hv4LBj6hOiNwUhJi9tyH+tuIkteCaszAHVOjWdeJBMVt3a
kKJdi8V3cFMiRiyMANheSB5S9GUWIEVfZiF0QU6IN0+zYrfSgMjWnTwiY7NC7Xs3PUcUV4jM
ghR9klI8JZFRneCSfu9K9F4mekUbp2fcTnpCopprMSEVeWOe7J519pK/qTuzweFG1CexxRmQ
WA78tWEisODGt3EbZXI/SDQ+zsQwn/Z1WhLLQYryMkYGeVzzFyBF7VEJ9HsFSNHiWAjbbIw0
52v6sVUGJHbhySMxNj/RvifouSVF8aK2/0mV5nraL3n1SczBkVgOJ3idRzGJrYFKWd3ZFt0m
HxFpcNMrOGwdzesJhKqqma9xBRkKkxMqHqrf1+cnP+FqsnkQDAZCg1lPUZ8oV2VAlKXw15no
35ibB4I2gIlhCYY6DMlEydR+l8J7PR3ATiDKefBbgGTNeowol3BEWceegShXGxBlw8khytHe
mNI7uMD2RenolNsjRXRflI1mOn3V1UQDrtqvTxCODAgi9baT/JfseEq4SfgdT14RWwG341mI
lIsuRRCW3/E836CB14/NBqanUfhNcAvX2BaigjXRoH6fv7JyUOM/OQ1MBugSnulJaRqYHQ2z
cQ3MbAaxBr7AoIEvOr0bmM0j9Y4/uTnN3wOc5u+4dGCVsmET8wU8lbjDrw4Ew+TRO2j8Sb/Z
S7LU7EwdKdFC7cCNYddpdl5Zox0pCuAd0OzsKidr9jUGzd449vmaddaJ97TjzodCL6/3h8i/
waQ3+o3sHAXetuBms2TA2xZoZEei8zbekSvhzIPWmzAPapSHFtuPvw1HZ/nQvO7CJ6HXFFtZ
Y8s8qJV7d0iSUKEl2TxoI1LMg9oS22oXIcU8qBUN3zzoOrYJtU3PPOiF3Ndk86AN3NcnVV+t
SDlfWZt0e/ciTV/AjAPo3d5t1NRqytu7F0GEdLd3L0Vqc2kWzRqiheuYrFzHZINmZQesmKFD
ByfRmBRsTFFIrfrG5EKmNwCqLauetsZ1aXBwpsTBzE1kLRbKTWRHAosLR4RFhjeRtQiV6yDU
MCKEjG4iK3aszWE2TQez9SPCjMhyzrC2OTRcKjSMhXupoR3S+mzYIW3UGbMYsdjYVvDI7JDe
xMl+cQd6bNkh9UgTE7KfvOuxTEBv6dghvZhLU5H9FyPFqoh1BEdqNqQ8UnNJyiM1l6Y8UnOZ
4dGWizW1VAqTw6t1jrawsMJKqYowhJVSYaX05FgpvRgJK6VxdGpYKd0AdZCn6Tg36qyqJXec
6a2U3mVwEAChAcMVTf5Cql7cAQtnydSqb6W0GOwXkp5yH/TEN9E0lef7Lfv0LaAF5SV02rsX
KLgdLVBWYeOFA+nNJ51Dlt9vgIGW1xP0h4Jejz9UHQp4qkIBvydMlmT9IT9+6/NVVxEroP5A
WDYT6K0M0sMIVUEwKhgKV4Z8nsqwn3jPZgbHfDiKT/UmhINWV+GgoWoviRX0VipmDT9GJHQ0
8PMdwS5kZJdUISFHYjm5BE6lTcT+qTAhmUkuR2ICXo5hA6zJbcGNEcXfu3D4GDdxuU7X0pmD
m5gzhmfL0OzOqJ27T8D2JKdyB4NmIsUuqR8Yiln7KgVm3QDPRdApMFX0UaSYNexCirWvGLyf
gGQl0/yCwCUGDNxiioEzskv6WR06PxXskpIwx23d+ry8WOFlZpeU4HMgX8GttsDE5e9KwsuK
XdLKyrDXEw6EqzCJV3oxp1RVEz/hJW84QI56+AKyddCAJ+jDvBWsDFTJPFRZXV2JOSZETQr6
MdNhDqkKh6tklguGA5h5qqv8vupKT9gXxLGrKnm7pCc359Q2KXgGNrZLqtBNJnZJ5SuQV+IW
kO2S2vFgXrkk3pXWVOFo2yVl0vhKjoG1dkkZA1+NFHN9XRoGvtSAgdtMMbCZZaNkTv76KErl
EJXKR3WlcgVwL3m+m+NkL2dhuNjerG87nONklM/hyT3HC0xI5WrCydvhYDFmjyrCM4Gwv8rv
qQyFfZ5qH7XSXUUYKuQNEqugoaBf5qAqHzHh7Q8EQB4Gq7Hk9Hhlb9Djr8YMiWWdzF/VlSRy
dZCIwHClv4rkEibM/K9IVnz/MWSeklb0GbsXGdkg/XpaySwz9ixMhAEM52EGWg9qaK4i+kxx
mHYMHZxk7sm6ZGaMPYuTzAGOsc/jGHs9UgwOX8UxdjPH2O3cCaUOTjL3aBj7MgPG3myKsZNW
XZO5+J4sc3GIcrFyaO2ADhfvogfn9iRuJh+EZ1KwZo6Law24GPkULm7mOJeNs6mcNsHF8SWE
i8lgaBtlJF+1P0zMc/uqApjcq4meEy8RiKEAOdqG3xB7vP5gCFgnEPaS05hYHDJeCoYxL/nB
ZDcOgHkpFKKMV0kEKo5eFSAWwH0+kpEv5PVhRr4ZZnIfT/4Keegz7jbVOjzPuPekZNwczO45
cGa+BFNCCarHTNEEjLsJt0ErjiMPqxXG7csK47J58zSOcWdDuDygS2ZAt55j3CaOcTdxjNvK
MW6UY9wujnH7UHrjwWWGRhXrMzIefKqWfXQ4dLjGg8XBhPFrPLgJKcaDlc2JbBkPvhylMqr4
SZTKqOJGw6+k2FcgI5OLTK1WGdRSGcjIK1CyaeGmNHv2qU0LO3/1xCfSmGJsSrO5f7lm1MKQ
ZdMc3oRgUwab+2lNMTah1KYYP2mA2CZTiGXdFGMTSm2KcaMBuhFT6GZ2GiC1KUad4b22ANN0
CnCFQQG2mCpAikMDg1RYuVQBjFFzIXNWj8uzIKDTFUtYPRYCWlg9vhIpVo+TBfRIrR5flVJA
N6cU0C0pBfQmQwF9paarK4eujuHCH6q70vShujSC+Mo0gvgqA6SadTqqK7MpiK9MI4ibDRBr
NYVY1gXxlWkEcYsBuu2m0D0JgvjKNIJ4k0EBoqYKMCJBfGUGgpiZa57Amfeqz8S8l4nijD/7
zG4kzHuNZfNeErTzI/gvOZ3C34x6BP8tkgoTHMhuPe7WPb63GynmvRD6eMx7tUJetX1cfO65
u0/PvFdbxrEsMJHKLJYVOk6zseTud7emn5qQ4lrB7kyuFexGIzcK1poCOa09qN3DOoqvxVIZ
EdgSWLSNCIsMj+JrEVJkvj2BUGRECA33KL4WM7VRMBmz9hFhZuoovhYNl6rFjJe4zzBlm6w+
K7bJtEUTtsmEbTJhm4wX34ptMvI2G7bJulKey+9OeS7/2pTn8ntQKlWXvYan9vny5iNZi1Q7
nHHTitatXKcqbJMJ22TCCJWwTSbI4pS3TbYVCdtkY8U2WRdSD2GZuO7TOdBmUlyPJdtk9Ogd
XAakGj4KOM0fhQbaQQqRcng1RzlgU+tUnlGuiUOtcznTR2VEO8zFMCBImrMFAp7K6iTrYVXe
qnDI4yXnRH3h6qrO3nVdjY1eTzhIzpX7QgE/CeINBIlhslFLWr/bWI+Mu41sWCVzoDBOuQpS
X4J/l+J352JYxaWxDtf1hSfNKhk7qhUG1iqDboZZtViCFLs8SyE8YfFzkWKVbBU8T0GKPo6p
SFG/yNi624Ctt6Vga2GVzJAdh2uVLOAPqq2S0Rf6LHG6WyW71oDktqcgOWGVzBTJUemBlCvj
cWqVrBz6mbWNxA4kUbft9YYDVYFBwy/6hFecRHijb5fMgckhnV0y1v85kVrLcY8Boe1IQWjC
YJQhoWVklyyw0O0PEoNjdFgwaC6YPtmd6nbJeg3IbKcgs+GQ2WjYJePJ6XS0SzbZlF2yemGX
bKSElsou2c2SDMIumbBL1qlJU96s6ZQXKEa8WRNLuVnTl3KzZlvKzZrtKTdrdqBUdsl2olR2
ya5DqeyS7TLcBurUbANNBun5KZ1tIBY2jfKm0bZL9iO6RffMamZP7Jilmb7PwX+espbT53r8
Z6OtKq3tsoZyfdtly+1Kvi/YlXyLC5R8jzuUfJ/JUfJtc1adX4IuwLW30nLKGtpKnKfQBlaO
OGRo7YpL0TBeusSVNNShR8Oq1+lVA4OCoARBZbMGlNF5Jzc6X5m0TaSoBEtnk24y7iGr0Dto
DpokeRI96gpJFsPrpdmoT1qEviZNRoekKnRCmoPOsHjwyPwZ1Vpy9mzVTYatnh/B+q0Ltvjn
wOLgJElesSmkWMpirphiqlz97QN7dgSXr8GWDFkPPgS27cgKzglJTpPMLM6wyGmyyWlMMzll
4nWXzuTUpHgdbZt3S+mpDMU8z4CN0/FhV/SM1DqOpjU55s7RNzl2lNtuOcBttzTncneeXdyd
Z+75QB6xGLUZDmD6wkk27wKVlQH84/MGyI/X5w94iXaAoJdc/aeaAap9Xq9sCE/WxqX+S/T7
sL9EO8jgycxMny1bkTFbprPC50Rn4bcLMfg5DdnVsL1Sg39XYLgAw3oMl2C4glqs0rJltqzz
OYEtz+LiLESK1T4/UowJVXPp1SDlRv0KbpvmAngug/G8A9jyEqTctL8Cqa1j9Rmw5e7hseVI
lvO073krf/SwFGfxL25TLP4hOxeGe4470lsCPGDVZ8tmjtXddo79uOcDDo5dOTZ2OwlbksYg
VlQ0Nv+Y2T/5PzP+p1C9rL1D/Uz+DmY7QQOpl4K9kpcn5b/EtqAVt4oFE5sVE7kVE5GypjMN
2GsW/iUG4BZjCGH4BIY6yl73IcVaBktXz+agFSkabCxIUSzJLASw7Z48IGMrpDuNY51ZHOvM
51hnMcc6IY51PsGxTp2GdbYZsM71J491zNgupJLRztnbsip2DAekeOK51qKER3lqC0B6krTb
wL6h26ZIUmRXJOlxiyJJj3KscyCH071HDdStgxw4U4Zgy3BBkkFDc1JncBTS1Geg8zNgIN5y
ooRJxYLJ1YbbyIbDK4s3k0COzcAh52FYjAmrEhPiORjOo8brtAxkZFFR4oiSMRCL5wLqYFog
2BirEBjLBQw0A9IrgfWrHI6B2P38So6BzuEYiJ1OYgy03YCB+k8eA2VqmZGO5m3KvmYzZyX2
KEfgA47Up2XWU3mmb73xqFNhoIFcThGWS3mO5ynPzfmctccCwkB9sLmdyh6j10/0LFZWhqrY
O+5bMBDS2Gj0V3pN/Ax+fFnrs+O1GbCj1makAw/MnLg1nSjMncBZCtOOlZiU12G4GMNGDK0Y
rtZlRzO2JB3cUJBZjvAgxcZkGCn2dJfCu2KQ14wd13HseDE8E3bcCM/lMHxmaiev1rDjDgN2
vOHksOOpcHRB91Cbjt1KPROHifdW7r2V6IdjBtE6fZXUDSa90SdeZwbEa/4og/yX2bqUzSE6
MORQzWmXcnMOFr6YO1PDjplJnLyQgNCYiURmCFoCQstBapWEOw0ILS4ILUuE5k8iNP94JLTr
DAjtxrFPaGbseM6lZwGVY8PN0sAq7VFnGoZ7brYSW5+zQWzFqjxVgZDfE/RV4xFyVZU3jB/D
VZ5QsNLv8QV8g6ZD6hOmexQIk7cKasf15IBDu3Y0hVoI1RImO3DGLISy8/ZMq3IeN3Vkh2/L
AUumbXkKUlsR3WVAmDeN3x4wnZXKxHsL9557JtPakoShiuX1/qDyb9DgvT7RFY5ib6jY/XRi
cGHIp0dZU/WGFiAsZrSPjSfZiWxmtK8cKRbFJnDTPP3zPHX0PM9SdC49Dc6IUZ4+KufKFWty
50FcYtmALbCuoL91kNY5WUmrNC5fVVfUt9SZUN+Sj5KVMw6nrvKzZpH1ZNK9evOrjJ7d73Hs
dV1XsLTISuslB+2T/OgpKo0X0Jorxgm20WNS8i7WV+lxaiZBSZxbnKwN7VzHSdzOWpRY1rbj
unRyQmciXba20dRIKsRuZoh7DnPPxH0IcIAaF2DL6EFNKK0LpfkeTvOdzxkB5uy9rOimHDCx
ciCPM9gXQjMFSFF6O4nOzPTd8RrGd4rfSdd/SsDoz1Q0jUvhljk/e5Q09FtffA1iHn1UndLR
R/PR/TaZiyS6oXAmFpd6OFxWq/IObOL8cgplNIUZmHtnoXsSO42pnBIq31SoVO678Xyk1i3y
LboNYsuAww6ayslcuq6M0iWhv1urLoNkOi8po7zMp5uXUbp5OmWwmM7LklFe5tPNzyjdfE0Z
pDFAS9IYoCVpDNCSZQzQkmUM0JLltKWlOfHrYBqoHg1cOOXYf9647pM1ZNDrzFFKLde/l1r2
UMdRfi1cvqoz9InRDUqMbrbTUi2ik3iZji61BMFau4v6LrWEOP/9tkstYeq/hY53tI5gfivk
fxv87oHfOVDaqYbjELm0l6co7eza5PaxJFFm+tLqY08wSYf9tNMa++lIO2rcVf69la9e11Sj
jPqMsD+qGXEefVTijDOYwx4ZYk8wSYf9mSlHsPfbMqv7bGJvpu7dpzX2M5D+bGHABOWsNqR7
NHLsKSbpsJ+Z1brPnGtHVvezTlPsK+LsrE4RhJ9J5Z6LG4vMoqsVrqQxygxlhahI+eKOT6ff
b7J/mPvVgrvLvml3u64riJXJqxp1OORx9Epi3YGUR06nGEGxaLnK0Y6Ut4JvhhLoy32Wm15M
d62MYS76gePsgjuczUUvOi4saHcuLXrEUVnQ72wqsuDWUWM4L76PjgckFKTHFOXDinKALw/p
InjglS0DpBc++qXXD9fk09WbVC6Xrijuk56i96EvtdAyOfmvyQZR5ifK/WX0XWiEEs0QitWn
TZ+etC5HFciaYoAkaYcuSDktyZZjcpGiy0Z7o29erTeBvi/xNJJGRzoLicmN7sr9Yd5rruYi
T+4reY+4lhZNzH0870WXcaMXYH8oqdGX/1MXwdpLp75awxZ/1I1+4MA3EsA3qxUaXRpBo5em
aHRpOI1uHWONvilvbcGSguaiW/OuLZhYsLSoM++yAk+BcaMTlcnhpEZ/8wN9DGHFD9X84Qea
Ro/H4wngm9WWhUYvy3aj28ZYo/8eN3YjbnRr/ucLFuNG/0ve9QUrUzR6Efb/c0jb6F36jR6f
UvA6afSBPc8996i60V944YUE8M1qz0Kjl2e70e06K+inb6Nb0K9ymnKn5ze43snZkftB3kKX
y7kv97W8coye36pu9JlJ69/cOCSRSzmH/WKK354huWR7cKhraYpB+H52vJTGJw1RImtjo24h
lcpJ+2GLaGtKiaGerD1O3tHPh0ZuQw50Df57dq2pqnPrVx1Jk1RD6qoL57rLHnS5yi/PXV52
p+v1sp7cjWXXuX5Vlr2qm2yTq26yjRzvS666Elp1DlXVkS3AS5uisY6k+sofeX0h4/oiZU9d
Xy/b9uT93L6k8CPbfXnftE8snGh/Iu9f7B/hQadXGkl93Wxl9TUVSG2eAamV0vrKkw17Q32R
Rl7JE9lkiog1qdIcNKPRqDo55VRV90hhfv73ig4VvFbozb+j6O6CDwpX5fcUxQtGSmp7Xazq
foTkqiP35vSqroxWXY6K1EjfdpkPaM242kgmw602mztVte1NSXFONN9RUUSmVGsdS4vkKRX5
JVMqrUSTp2y5qvSJbwHFYgpM8iycMBnpdItgkhp7MiH8N0dzEZkQbsfhyRSN/FqQOyPsp2cZ
e4ZJKuwL0Tpc93dh7Hso5kuLLnfMLrrD0YTr3mJRY68Ivq/QwyGk818Ly8k5KSZhThOCjn8/
UjY1ctkocymUuWAclbkMylw4jspcDmUuOm3KXFEbp8eU9kg3yvpwz+1oab3G3dLZ5r5kSzQW
wYNtG3Q3NyG3QxntpkPZyPGrWmTyT+aCZGrQ3NxM/eT32LFjiYWB0yXMWHSifYQTTrhM3Jtx
dr/hLVRrVcQPPQcpqkc44TJyb6Fim/oc4NAYlM4ijAgjwpgPo8hWCydbRU2JMCLMcLjIKrhI
hBFhRshFNjHPE064Yc7zGBfZBRcJJ9wIucghuEg44UbIRTmCi4QTbljuzdp47acSxzEUjTVf
p6eDlRX9byQMzShHvOSrRLmqr0zjC/tKNQiDlhk7p2Wm3oSWGRKXncIgWFyy7ILDZk5vjEWn
1jJjBy0zCyU/uovqezuL1px7+FpmBnpqEdLTMkP09TAtM61I0fPSxj1HuOd27lmtZYaPrefa
NN8nIOUkz5AmF73v7Wm+K1pmbDCDYVcoFC0z5BY1uYtMDlmRe7FmtMwU1yp++Vb5DFpzi5AH
LVZSiN//6mMkxtGfb369hkvmwBe/+GfOL9/5nElT8CIfrvnhaZmZRVMIYAoIZaxlZuShhJYZ
s3kJLTOpQwstM6ceLQktM0LLTLZo6XTXMrMoaTTw+0Nf2rEhuGnEWmZUOCdGNygxuknWMvMT
qZXTKvMT6SdSG+e/2foTKcL56+0/kdpTaJ0hJUmnQ8FjOC7Jrt6WVKUfvgaIxac19l6kHUXe
9eGm/9p8ZEU63SE47H/VJPO7lCH2SB97wCQd9r6UI9rs6W3JEHuTde8/rbEPIP3ZQ7a1zmSM
vSmtM8Gs1n3mXDuyug+dptjLWmeoWm0Iny2tMweo1plXy56gWmcOn1StM4dNaZ35ouNofoGz
ueiww1bw55ylRfc43syXUmidmYr9rUm6KB7QX7li6wLx3vojOlpneOUj8nob0TqzULqLap35
iTRctQQTNEOqUdU6Y9eJfarrovik8yPXr3Obi25wzsz7Tu7Sos1OV97jucaNPg3725Ia/V19
rTNHb7/stcRikFmtM3KjSyNo9IkpGn3YWme062ync6NPc303/3N5zUV1rmfzt+YtLZrvejj/
ljzjRp+O/ZGkRvd9qN/od/zzedLo7vt7XjatdWbkjT4p241uG2ON/vu8KaB1pga0zsxNqXXm
TOxvRya1zgw8NunnlNO3PTJYY1brzMgbvSLbjW4fU40ua52ZDVpnUL6sdebYSdU6406hdab+
49Q6cyyt1pm9ZQ+6tpVfnnt/2Z2ui8p7cp8qu861pDx7VXcLaJ25xUDrzIyTrXUmRX09lVbr
zAu2PXlP2JcU/q/tvrwD9omFxfYn8vZkVevMRCC1mQakNlNonVFXnXmtM7NOR60zv7MTrTOv
llmojpfDw9Y6syjLelsOm9I6cwC0zjyRpHXGF88Ee+9ppnWGiNfdsAk9XrSRTIQyTxtHZZ4E
ZZ4+jspcAWU+EwmtMwZOaJ05fZxoH+GEEy4TJ7TOCCdc9pzQOiPCiDAijNA6I8KIMELrjAgj
wgitM8IJN9bmeULrjHDCZYuLhNYZ4YQbKRcJrTPCCTc8d3K0zoTi8rtcGnpNy86uvpjbp6Ns
hhy6qEVqZTNXzf/0svGqbCZMhwgOeiDlAVqjvAIJApX01KOFLg6xOrJzz/JlMYfSLFm6LJaH
nJJTkly/dC2UFkq/zT3oWi4tl36au89FcEx3IFQ5ZSyfTjrh/HmufAjUSs8HIfQ7JW/OmTpj
JOmfMWIY6sVk56ry0PFcp/T30ul55bhcg6UfuBbiWIdLXxtWqT5wlrnkUtlHrVQMQ/1SVdTe
gNhWd5ozVOLkVKowY9GJ9hFOOOEyGi+Kk1PCCZfFVQxxckqEEWFEGHFySoQRYcTJKRFGhBEn
p4QTbmzN88TJKeGEyxYXiZNTwgk3Ui4SJ6eEE254jpycUs5LhWqrEmecyFmZhp6uqyOtMXe0
s73L8KQT/zvenazijdWFosH47NqtCZNQir7Nf3z97ZIXpU56mmbFju5IT3RrpDPmXk5MmHVR
fXq+4GJvcLHf6/eiTqqmkQu2ejkORPdbOukZnnVdscimrq5rVB+cSisqLwtUCUV6lC+5cvBY
V2tXh/KW/oDvDjRb2eYhekhrnv7lL5fp1YVCVlW11ngtUqv6HI6Tav8/AAAA//8DACBR
Zeg=</Template></GraphPadPrismFile>
