# Supplementary material for: Regulation of stem/progenitor cell maintenance by BMP5 in prostate homeostasis and cancer initiation
Source: eLife journal article supplement (doi:10.7554/elife.54542), 2020-09-07
Supplement: fig4-data2 [file elife-54542-fig4-data2-v2.pzfx]

<?xml version="1.0" encoding="UTF-8"?>
<GraphPadPrismFile xmlns="http://graphpad.com/prism/Prism.htm" PrismXMLVersion="5.00">
<Created>
<OriginalVersion CreatedByProgram="GraphPad Prism" CreatedByVersion="6.0.1.298" RegisteredTo="      " Login="Admin" DateTime="2020-07-16T13:16:48-05:00"/>
<MostRecentVersion CreatedByProgram="GraphPad Prism" CreatedByVersion="6.0.1.298" RegisteredTo="      " Login="Admin" DateTime="2020-08-11T16:18:14-05:00"/>
</Created>
<InfoSequence>
<Ref ID="Info0" Selected="1"/>
</InfoSequence>
<Info ID="Info0">
<Title>Project info 1</Title>
<Notes>
</Notes>
<Constant><Name>Experiment Date</Name><Value>2019-06-14</Value></Constant>
<Constant><Name>Experiment ID</Name><Value/></Constant>
<Constant><Name>Notebook ID</Name><Value/></Constant>
<Constant><Name>Project</Name><Value/></Constant>
<Constant><Name>Experimenter</Name><Value/></Constant>
<Constant><Name>Protocol</Name><Value/></Constant>
</Info>

<TableSequence>

<Ref ID="Table15"/>
<Ref ID="Table0" Selected="1"/>
</TableSequence>
<Table ID="Table15" XFormat="numbers" TableType="Survival" EVFormat="AsteriskAfterNumber">
<Title>Fig4E</Title>
<RowTitlesColumn Width="39">
<Subcolumn/>
</RowTitlesColumn>
<XColumn Width="81" Decimals="0" Subcolumns="1">
<Title/>
<Subcolumn>
<d>19</d>
<d>19</d>
<d>16</d>
<d>18</d>
<d>21</d>
<d>21</d>
<d>17</d>
<d>28</d>
<d>29</d>
<d>30</d>
<d>31</d>
<d>31</d>
<d>16</d>
<d>22</d>
<d>23</d>
<d>19</d>
<d>20</d>
<d>21</d>
<d>40</d>
<d>38</d>
<d>50</d>
<d>46</d>
<d>17</d>
</Subcolumn>
</XColumn>
<YColumn Width="163" Decimals="0" Subcolumns="1">
<Title>Krt5CreERT2Ptenf/f mock treated</Title>
<Subcolumn>
<d>1</d>
<d>1</d>
<d>1</d>
<d>1</d>
<d>1</d>
<d>1</d>
<d>1</d>
<d/>
<d/>
<d/>
<d/>
<d/>
<d>1</d>
<d>1</d>
<d>1</d>
<d>1</d>
<d>1</d>
<d>1</d>
<d/>
<d/>
<d/>
<d/>
<d>1</d>
</Subcolumn>
</YColumn>
<YColumn Width="137" Decimals="0" Subcolumns="1">
<Title>Krt5CreERT2Ptenf/f K02288 Treated</Title>
<Subcolumn>
<d/>
<d/>
<d/>
<d/>
<d/>
<d/>
<d/>
<d>0</d>
<d>0</d>
<d>0</d>
<d>0</d>
<d>0</d>
<d/>
<d/>
<d/>
<d/>
<d/>
<d/>
<d>0</d>
<d>0</d>
<d>0</d>
<d>0</d>
</Subcolumn>
</YColumn>
</Table>
<Table ID="Table0" XFormat="numbers" TableType="Survival" EVFormat="AsteriskAfterNumber">
<Title>Fig4J</Title>
<RowTitlesColumn Width="39">
<Subcolumn/>
</RowTitlesColumn>
<XColumn Width="81" Decimals="0" Subcolumns="1">
<Title/>
<Subcolumn>
<d>19</d>
<d>19</d>
<d>16</d>
<d>18</d>
<d>21</d>
<d>21</d>
<d>17</d>
<d>35</d>
<d>45</d>
<d>45</d>
<d>45</d>
<d>38</d>
<d>43</d>
<d>49</d>
<d>51</d>
<d>56</d>
<d>16</d>
<d>22</d>
<d>23</d>
<d>19</d>
<d>20</d>
<d>21</d>
<d>62</d>
<d>62</d>
<d>17</d>
<d>15</d>
<d>14</d>
<d>16</d>
<d>18</d>
<d>15</d>
<d>14</d>
<d>20</d>
<d>19</d>
<d>32</d>
<d>33</d>
<d>36</d>
<d>38</d>
<d>40</d>
<d>37</d>
<d>29</d>
<d>27</d>
<d>28</d>
<d>26</d>
<d>28</d>
<d>27</d>
<d>27</d>
<d>27</d>
<d>40</d>
</Subcolumn>
</XColumn>
<YColumn Width="147" Decimals="0" Subcolumns="1">
<Title>Krt5CreERT2Ptenf/f</Title>
<Subcolumn>
<d>1</d>
<d>1</d>
<d>1</d>
<d>1</d>
<d>1</d>
<d>1</d>
<d>1</d>
<d/>
<d/>
<d/>
<d/>
<d/>
<d/>
<d/>
<d/>
<d/>
<d>1</d>
<d>1</d>
<d>1</d>
<d>1</d>
<d>1</d>
<d>1</d>
<d/>
<d/>
<d>1</d>
<d>1</d>
<d>1</d>
<d>1</d>
<d>1</d>
<d>1</d>
<d>1</d>
<d>1</d>
<d>1</d>
</Subcolumn>
</YColumn>
<YColumn Width="191" Decimals="0" Subcolumns="1">
<Title>Krt5CreERT2Ptenf/fBmp5SE/SE</Title>
<Subcolumn>
<d/>
<d/>
<d/>
<d/>
<d/>
<d/>
<d/>
<d>0</d>
<d>0</d>
<d>0</d>
<d>0</d>
<d>0</d>
<d>1</d>
<d>1</d>
<d>1</d>
<d>0</d>
<d/>
<d/>
<d/>
<d/>
<d/>
<d/>
<d>1</d>
<d>1</d>
<d/>
<d/>
<d/>
<d/>
<d/>
<d/>
<d/>
<d/>
<d/>
<d>1</d>
<d>1</d>
<d>0</d>
<d>0</d>
<d>0</d>
<d>0</d>
</Subcolumn>
</YColumn>
<YColumn Width="194" Decimals="0" Subcolumns="1">
<Title>Krt5CreERT2Ptenf/f R26G3/+</Title>
<Subcolumn>
<d/>
<d/>
<d/>
<d/>
<d/>
<d/>
<d/>
<d/>
<d/>
<d/>
<d/>
<d/>
<d/>
<d/>
<d/>
<d/>
<d/>
<d/>
<d/>
<d/>
<d/>
<d/>
<d/>
<d/>
<d/>
<d/>
<d/>
<d/>
<d/>
<d/>
<d/>
<d/>
<d/>
<d/>
<d/>
<d/>
<d/>
<d/>
<d/>
<d>0</d>
<d>0</d>
<d>0</d>
<d>0</d>
<d>0</d>
<d>0</d>
<d>0</d>
<d>0</d>
<d>0</d>
</Subcolumn>
</YColumn>
</Table>

<!--Analyses, graphs and layouts as compressed binary. Don't edit this part of the file.-->

<Template xmlns:dt="urn:schemas-microsoft-com:datatypes" dt:dt="bin.base64">eNrsvQtgVcW5NjxrX3InCSHBECBsEi7hYghIuFQ0QS5KARtIFGupEpIdswUSzIUgStytSkHx
A0m9fPb0/JzWlvT7T1v+c6rVNlF7bCv/sV5ARH5uIvUon4hELv4WOO5vZq139p5ZWWtnrVy2
m/hOeFgza82aeeed95mZNbPW7JI58+ffuHT2VMWfRAjZrmxXHPT/SnKb41/IKHrmNgeRHA8r
FM9kEsKCDn/JWEJc1OekqKJwU5xX5DsD1LGjQwBPKYWgQ4cOHTp06K5050QVoEOHDh06dNif
o0OHDh06dOjQoUOHDh06dOjQoUOHDh06dOhU5yQ30P+XOglZ5AodrTv2vt0eohC3+oYdcZEf
R2lBY/zsVcCBJFYtsOZm1/nKV4cpMHs1MVkIb9deNnQ6lBxIh51wkNJ716ysXU1M0xlLMcgw
nTRIR3tVcZmv5q5Kivow8gwzTMcB6WhLKGW+Nd56z83eJs/S2jXlNZ3SyaUYEFYerSi3eusq
y2vKiVk6rFypYfXDXtHcRIr/+L/e/POBt19/kxinM8o0HV6uGDUdlszrb/7tv0iYdJLCphMb
TEcVp9vyxKkn5tQ21vm8dUzTxCwd43qfDOnEa/VV513ZWFHtbfAsLiUG6Ywm8surnfWcoJZL
1U2YdDxdlitRPVF8Q3lDec1dxH463H6StHpXCea5pcZXUVvpZYnJbkKX/BoQsh+tcIbpdF3v
yVo6b/5sz+m9f/nDIZN0xnep5xQ1nUWNFb7Kcs+NdeU1lV7SOR292y68pKylkyq0G54y313e
OmKQjkdtsYz1HFO8UWUpez26Oej7MVim1jBrIUUKOaSQUwq5IPSo6vNTPEH2x4bS67606NCh
Q4cOHbqv27GO+SfBx5W/knUOfPkK3dfhHMUz/doneh+qI9MP/CvI8ScVchuF+GXfKBrYo5t2
iBRTVotPzvTEa0J4VwYhf6GDXs+8xfNZbCb3JKf2vCo9AdATWZRwxfT+Dn0mJ1zE/ysnGQnP
lQPhaSYOng9ThfIn6sKDIS4d+pM08DOZM8DvhGdD8WktG+LrdTsE7mGqHR16ovIvov9VhtEB
v3+kVDJ/kbHf2In5cT2I5eHnuOwBcMfhKXIsnOc209HRIaXLzuvL8T488fG0PqD+ib1YDjNZ
6cMTKflJ13LQM0pXcnAaMBudSrGTYvczlEeQRh4J+RX6hOaE6wYTefwfOnToosRVVVUdbWxs
DKxduxaBQPQhGM8Y30T+eb3eQ9u2bQt8+OGHgXPnziEQiD4E4xnjG+Md5yDj5YkTJwKffvpp
4K233kIgEH0IxjPGN8Y7zkHWPzJ+7t27F4FARACMb4x3IgfPnz8f2LdvHwKBiAAY35CDCARy
EIFADsoc3L9/PwKBiACQgwhE9HHwwoULgQMHDiAQiAiA8Q05iEAgBxEI5KDMwYMHDyIQiAgA
OYhARB8Hv/jii8ChQ4cQCEQEwPiGHEQgkIMIBHJQ5uDhw4cRCEQEgBxEIJCDCARysDMHjx49
ikAgIgDkIAIRfRy8ePFi4NSpUwgEIgJgfEMOIhDIQQQCOShzkO25hkAg+h7IQQQCOYhAIAc7
c/D06dMIBCICQA4iENHHwUuXLgXOnDmDQCAiAMY35CACgRxEIJCDMgc7OjoQCEQEgBxEIKKT
g59//jkCgYgAkIMIBHIQgUAOyhy8fPly4OzZswgEIgJgfBM5yH6b/pNPPlHX7lE/CETfgvGM
8Y3xjnPwrruqjjz++OOBkydPqvxEIBB9B8YzxjfGOyK45cuX72lqalL7RwQC0XdgPGN8I+jQ
oYsKt5CimKKAwk3hoVAAqUK84xQTDMJjKIZROOC8AsdXX32VjKbHJLg2FNLj8aZB+CiEedxY
Qvx5wn054A9QN5Ie4yjS4BzLazD4mVvK5pcU7b4LNL5YzjbI2OlQchaTUlrOUlJOaki96vOS
OuIjVTb0Nm/OsqaSuFlMZaRq6rKm2WoK5WS1evU6sttzHYlLzCMv5DzsZH5fTWWtZ+R1tHSE
nGWC0yM7X0/lmrFktHPnpafd51QZ84hCr59/aFkT11UbTQO8jhXDRzP/l+z+1XA+EKvFP+Aj
L1ePG+1UQHcclz0snqZVFo/5v6TnTiZvcW8tTFLjZE5PIm8s/l7TnRsLla+o7liZ2PlnpyWR
LXvzGtk9letU9QePYv1y3TsNdL9dQd33le6ZEJwXKwVeDBT8CwUuM6VlwDWXzj+fIh3SKru5
pCSG3ryE+l+hiId4mcDleIF3BNJnKIG2xA/tCnObyGfB63lCXCXYWhg7ZkZFXxEKN4CYYgQc
H6C4yGwR2jIm/yyHPfk/Zfcoocbsr2SzifxxnWSerJN/YnoMeW/9dHK4+VoyMS2GXD0olrzT
WEg+3jqPvHfvDHo9jrxwi4eMG+gmb9QUkCMPXEsO3jeD/LliHPnTH88Qn+8fpGBwPL2WTw7e
W0jal48iH733Dnnzud3EW3WevHT7SLKncgz57aIscvrvx8mJ/XvJnSs/I5vHxJCnpiSQZ6Ym
ki1jY8mLz31Mln3/I/Ji21ly6oP3ScmyY+TGJfvJ9QtfJ4XzXiETi35Pcmf+mgy75hckPf+n
JHn8U5QLBaJTFGVSdnb2JHYE5GdmZuazI+Bq0dHwRBp/IjsCJtD4E9gRMF50NDyOxh/HjoAx
Y8eOHUOPeQDPyJyc3FGjNUfDStbQocOGZ2ePoPeNoMFB6RkZg6/KzBxC8xmiKEkDklNSUgem
aU6JiY2LT1ASlaBzutyK5BxSSM+HWEXuj8T2LzNoT6+QbAhzXh4Dng0WOCn2YUN1fa3Yp5VR
3E9RDWk9CTKx+zaVPz275vDzs/k1hkWdOaS65dRfShppS7mOtpXr1NYyTutvVe7HQlsSK/jD
yWV13DCKnthjEBbbr0whXVF3GaC7nB7o7scUd0BaOyFdUXd3CG2gme4qqX8u1VgDhYf2Wo1k
Df0rp7q8V9VhDJSDH93g53Uinu9LnYq2mSfoVxxPcZscAuc6OjpUPfGyj6fIpbhepydRL4uE
cRyLP4qiCM6Phfrj130+n0M/VuB5s2v6vInNvBUhb6N0c22WKdegTEbpKpBejsV0efxcId3R
obo3HfPWMbt1aZyfJJSDh1ODthEQOlN/kZGfD8vYOGkq8IGR37hv86i2ozYOnXtm/q9fuYqK
imav1xu4++67A6tWrTIEux4ujaqqquZ77rlHnetYv359J9TW1napNpp/M1sruO+++wL333+/
hPr6ektqr6mpad6wYUPA7/cHfvCDHwTBZLCqDypDM7t/06ZNgR/96EcqmpubbVU7LUMzu//R
Rx8NbN26NfDggw/aNhsqdzO7l83fPvLII90yu4cffrh5+/btgccee6zbZkvzbu7J/czR+5v7
E2fEZ+5zYZ655We07rgk9dmM4et8/rvo6Nnz3wylZ89/Yj/Kxw4xBv36xd/8RurXi6DvKLXY
txZBH1im69e5MjpSUhz659DgmIJe0+dNbOatCHkbpZtrs0y5BmUySleB9HIspsvj5wrpGvXr
Tl2/Xgbxk0Eu1p/frMsvTdDFIqErFstRoj5z7mNmGNYe9OO8MpC52mKdlEGePhN70I/znGHG
eWVwtJO3IuRtNs6zU6ZcgzKZjfOqoe6qLdpDNaTv66Y9lIE9VBjYQ5mBPYjlYPYwhZy3bQ8+
kHmjxTrxQZ7NvWAPPjjayVsR8jazBztlyjUok5k9bIS622jRHjZC+s3dtAcf2MN6A3vwGdiD
WA5mD9d0o31oBpl3WKyTZsizpRfsgQ+Q7OStCHmb2YOdMuUalMnMHnZA3e2waA87IP2WbtpD
M9jDYwb20GxgD2I5StRnP/v20AIy77JYJy2QZ2sv2EMLHO3krQh5m9mDnTLlGpTJzB52Qd3t
smgPuyD91m7aQwvYw88M7KHFwB7EcjB7KOyGPbSCzG0W66QV8mzvBXto5WNzG3krQt5m9mCn
TLkGZTKzhzaouzaL9tAG6bd30x5awR5+b2APrQb2IJajRF2btW8P7SDzaxbrpB3y3NcL9tAO
Rzt5K0LeZvZgp0y5BmUyk1ecW7ZiD3sh/X3dtId2sIfXDOyh3cAexHIwe5hO9qv2wG2Az9Ef
M5nTd9iwneOQRq7SeV3DSB88/i2KNm/fU9uxUxelSue8rdRFX5S/tBfKL+ZNbOathLHx42Bv
dsqUriuTFb3yd0+cYd49EdexjuvePblFMX/3xAn8YciAeMPpMUVXnixBd5xDehtlHJpNORSv
e0/iXJj3JHC+rHfny/TrjOHaJ1Ytoi1ngC2Ps2jLGVD343X8FJZSJH66TOzdZdKO6NPT893V
i+2dvixW5BTXNEX9W/EzWV+gOEFxFeh9jE7v/FqawLkToPdSkHWtup5aRxro6HYOPXrJPMq9
MjKFsrGBhmpIFZlEEQ/38zXweJ0/XlgTF6/xNXIXHEV7yjQov5352uN8zVKxtrbI47N6KjKx
Of18rSvMfK1dG9HnbZSuWKbxNsrE0p/QRbrX29TV9ZBukQ2bFvsCJlc2Pc406AvGG/QFon5Y
X/BdciAQZ/IOl1kbVARlLLVYxiLIsyxCbVBHVpa5fdFr3bWvpQrroeSyRELO4/DumB2dLwF5
y7rZVgrthqOnbeht0CYyYc+A3enb0Nkgu9iGFgE3SoNzRTOC7Z2ZrF3ZbhnosdqiHsugvn39
oP/Ul6UncgYMyh3UOb0m6rzaps6rQV5fFNnurWC7XgPbvdXAdsugDNXBdZBpPbZdH+hxo0U9
+qC+m/uB7erLEinb3WhT5xtB3uYosN0ysMVVFCcpNhjY7irdGOEE2E0plFl7h/pAoCd22ww6
3GFRh81Q1y39wG71ZYmU3e6wqfMdIG9LFNmtH+x2m4Hd+g3sthnKsKOX7LYFdLjLog5boK5b
+4Hd6ssSKbvdZVPnu0De1igaKzwBY4VnDez2CYOxQguUYVdwrDClx2OFVtBjm0U9tkJ9t/cD
29WXJVK222ZT520gb3fkNKv3dpDhNYsytIOu9vWDeteXJRL1blfO47CGVmpTzr5qsyqhDXqZ
aN+qvWbQZr0M8ohtVjuUYS+kM5k+m+eTwmC75eqi/TL6dslpsK7H9cr0NkGQn/f9lYKO34f5
LX7PB9Q/UU2zQ4hl/D2CmRPrxkwm9l1EyU+6lqO730XsfoYQngazD+7n30Ww651d//wuAh26
K9lVVVUdZd/T4B4sCETfgvGM8U3kn9frPbRt27bAhx9+GDh37hwCgehDMJ4xvjHecQ4yXp44
cUL97fK33noLgUD0IRjPGN/EPV9Z/8j4uXfvXgQCEQEwvul/f+D8+fOBffv2IRCICIDxDTmI
QCAHEQjkoMzB/fv3IxCICAA5iEBEHwcvXLgQOHDgAAKBiAAY35CDCARyEIFADsocPHjwIAKB
iACQgwhE9HHwiy++CBw6dAiBQEQAjG/IQQQCOYhAIAdlDh4+fBiBQEQAyEEEAjmIQCAHO3Pw
6NGjCAQiAkAOIhDRx8GLFy8GTp06hUAgIgDGN+QgAoEcRCCQgzIH2Z5rCASi74EcRCCQgwgE
crAzB0+fPo1AICIA5CACEX0cvHTpUuDMmTMIBCICYHxDDiIQyEEEAjkoc7CjowOBQEQAyEEE
Ijo5+PnnnyMQiAgAOYhAIAcRCOSgzMHLly8Hzp49i0AgIgDGN5GD7LfpP/nkE3XtHvWDQPQt
GM8Y3xjvOAfvuqvqyOOPPx44efKkyk8EAtF3YDxjfGO8I4Jbvnz5nqamJrV/RCAQfQfGM8Y3
gg4duqhwCymKKQoo3BQeCgWQKsQ7TjHBIDyGYhiFC84rcHz11VfJaHpMgmtDIT0HXJ8G4aMQ
5nFjCfHnCfflgD9A3Uh6jKNIg3Msr8HgZ24pm19StPsu0PhiOdsgY6dDyVlMSmk5S0k5qSH1
qs9L6oiPVNnQ27w5y5pK4mYxlZGqqcuaZqsplJPV6tXryG7PdSQuMY+8kPOwk/l9NZW1npHX
0dIRcpYJTo/sfD2Va8aS0c6dl552n1NlzCMKvX7+oWVNXFdtNA3wOlYMH838X7L7V8P5QKwW
/4CPvFw9brRTAT1zXPaweJpWWTzm/5KeO5m8xb21MEmNkzk9ibyx+HtNd24sVL6iumNlYuef
nZZEtuzNa2T3VK5T1R88ivXLde820P12BXXfV7pnSuC8WCnwYqDgXyhwmcXPEOpN9M+nSIe0
ym4uKYmhNy+h/lco4iFeJnA5XuAdgfQZSqAt8UO7wtwm8lnwep4QVwm2FsaOmVHRV4TCDSCm
GAHHByguMluEtozJP8thT/5P2T1KqDH7K9lsIn9cJ5kn6+SfmB5D3ls/nRxuvpZMTIshVw+K
Je80FpKPt84j7907g16PIy/c4iHjBrrJGzUF5MgD15KD980gf64YR/70xzPE5/sHKRgcT6/l
k4P3FpL25aPIR++9Q958bjfxVp0nL90+kuypHEN+uyiLnP77cXJi/15y58rPyOYxMeSpKQnk
mamJZMvYWPLicx+TZd//iLzYdpac+uB9UrLsGLlxyX5y/cLXSeG8V8jEot+T3Jm/JsOu+QVJ
z/8pSR7/FOVCgegURZmUnZ09iR0B+ZmZmfnsCLhadDQ8kcafyI6ACTT+BHYEjBcdDY+j8cex
I2DM2LFjx9BjHsAzMicnd9RozdGwkjV06LDh2dkj6H0jaHBQekbG4KsyM4fQfIYoStKA5JSU
1IFpmlNiYuPiE5REJeicLrciOYcU0vMhVpH7I7H9ywza0yskG8Kcl8eAZ4MFTop92FBdXyv2
aWUU91NUQ1pPgkzsvk3lT8+uOfz8bH6NYVFnDqluOfWXkkbaUq6jbeU6tbWM0/pbVX52dMKR
+8PJZXXcMIqe2GMQFtuvTCFdUXcZoLucHujuxxR3QFo7IV1Rd3cIbaCZ7iqpfy7VWAOFh/Za
jWQN/SunurxX1WEM6Isf3eDndSKe70udiraZJ+hXHE9xmxwC5zo6OlQ9sbKPohhP8T7F9To9
iXpZBH0bj8/GgkVwfizUHx8P+nw+h36swPNm13jex2zmfcwgb6N0R0F6R22U6XpIn6c7OlRH
pmNTHsdpoGPWD4jyFEE5Sy3KUwTlLDPRMR9Wizq2IjOXU59eR1aWaZ2xa1yOo+poy3pZeHyx
LD2RM2BQ7qDO6TVR50y+IzZ0Xgry2pFT5LLQpjnE86KdWPGXQbvFnrOYsA/AGEUsA7+WDLK6
IH4R2HEp9B83qy3XSnXE7SG1dMztob5a0kTbtHho9xOFPsCl6xvEMI9vVuauOFAGdlNtsT7K
wG58EeKAnXbLTlmOGZQlUhyoBpu2qvNqkNcXBRx4G2z6VujTvQYcuBXsUeRAGZSBlWW92qeG
/nKDLFhJR0PsiXQV9a+m5a2h6dcH7V2PWANe6MdPPI7T4Hx3OeMDO9tosf58YGfNUcgZO2U5
ZlCWSHFmI3DGqs43grzNUcCZdEXjwCoowwYDzqyC8YrIGR+UgZVluwFneJ/hof/76Ki4mvp8
tGdZS8/X0z+fyicvPVsJo2bSJZf0/YoL/E5dPKeuj4rVcc+p46fo7y7vmsFWd1i0gWaw1ZYo
5J2dshwzKEukeLcDbNaqzneAvC1RwLsPgUdsDuzfKLYZ8M4PZRd51wxl2AHX9byroJxis6a1
lIFeyi3tWXQluZuGKijP6i3wLNYALhO/vk/rKY9awPZ2WazTFrC91ijkkZ2yHDMoS6R4tAt4
ZFXnu0De1ijg0d+AF09QPM3mww149ATM34g8aoEy7DIZ81VSvpSr/VY9mUT961Re2eePEW/c
vciXVrCxNot11wo21h6FfLFTlmMGZYkUX9qAL1Z13gbydkdOs3pvB129ZlGGdtDVviisdztl
OWZQlkjUu36+14rO94K8+6KgnWyFdu9lWCt4zaCdZNdSdO1kO5SBlYWtnS5WRxU+9UlYG1uI
qwXyuNsZph10C/PdPK5Z2UX9iP5kWOfga3Pp6vMAm/kvbaxb51tXvtpTW+WZ77tr6rdJAhlG
i7uUZrPIFapJxaEdxdqNxBsVCmiTu1xFqxHudtHu6i8Daa80b/F8Fvu2JxUyyamtEkir5vRE
Fi1PMb2/Q5/JCRfx/8oZnGnmq71x8NSUKqwKsFr7lnomEHCr8gVojQQCDvKCWhMO0jnvARTX
Bnk0i0yk/ydA2RzCU1nAxF0H73nsVCXia+mfBNMhBmnxVZNYoRxF6rslDmEdxKGrzWK19w/a
xNq62rW1dQ2+2pp6g5t5tqGbmVnmMkuqb1x5t7eiod5T3uCp89WvEu7mKRBXuuoP3c3UPodm
7fVU1K5ZW07vq60xupFar1O6kel3bnlDOc12zZryunuFm4IuLqRih3qTmpRxRLfViDFWI8Za
jRhnNWJ854jzyVwqebyHkHG/w1ex0KHrLy7Qy46/KtRVPEmIzf8ObyB1FAlniz/Y8FDR160f
sUfqDX39Su1aXV0Mc8Qcrd3hsH2H0/YdKBVKhVKhVCgVSoVSoVQoFUr1TZFqZvEHfi2FFeT4
k9pkoCiD/lXfb/Ikphjm08lsAlN8HTxDmBpPIPJr0/zVcr1uxWUYcRqfTZVXhtEBv3+kVDJ/
kbHf2In5GX3exs9x2fnzHlsimSAseXCbYa9zi+kqMOUvloMtx4wX0vqA+if2YjnMZK2jKPlJ
13LQM0pXcnAaMBudSrRXZHc/QwhPgy3BcL9CPKo9sOsGMxX8Hzp06KLEVVVVHWXb5eC2CQhE
34LxjPFN5J/X6z20bdu2wIcffhg4d+4cAoHoQzCeMb4x3nEOMl6eOHFC/bnht956C4FA9CEY
zxjfxG0aWf/I+Ll3714EAhEBML7ptww/f/58YN++fQgEIgJgfEMOIhDIQQQCOShzcP/+/QgE
IgJADiIQ0cfBCxcuBA4cOIBAICIAxjfkIAKBHEQgkIMyBw8ePIhAICIA5CACEX0c/OKLLwKH
Dh1CIBARAOMbchCBQA4iEMhBmYOHDx9GIBARAHIQgUAOIhDIwc4cPHr0KAKBiACQgwhE9HHw
4sWLgVOnTiEQiAiA8Q05iEAgBxEI5KDMQbbnGgKB6HsgBxEI5CACgRzszMHTp08jEIgIADmI
QEQfBy9duhQ4c+YMAoGIABjfkIMIBHIQgUAOyhzs6OhAIBARAHIQgYhODn7++ecIBCICQA4i
EMhBBAI5KHPw8uXLgbNnzyIQiAiA8U3kIPtt+k8++URdu0f9IBB9C8YzxjfGO87Bu+6qOvL4
448HTp48qfITgUD0HRjPGN8Y74jgli9fvqepqUntHxEIRN+B8YzxjaBDhy4q3EKKYooCCjeF
h0IBpArxjlNMMAiPoRhG4YDzChxfffVVMpoek+DaUEiPx5sG4aMQ5nFjCfHnCfflgD9A3Uh6
jKNIg3Msr8HgZ24pm19StPsu0PhiOdsgY6dDyVlMSmk5S0k5qSH1qs9L6oiPVNnQ27w5y5pK
4mYxlZGqqcuaZqsplJPV6tXryG7PdSQuMY+8kPOwk/l9NZW1npHX0dIRcpYJTo/sfD2Va8aS
0c6dl552n1NlzCMKvX7+oWVNXFdtNA3wOlYMH838X7L7V8P5QKwW/4CPvFw9brRTAd1xXPaw
eJpWWTzm/5KeO5m8xb21MEmNkzk9ibyx+HtNd24sVL6iumNlYuefnZZEtuzNa2T3VK5T1R88
ivXLde800P12BXXfV7pnQnBerBR4MVDwLxS4zJSWAddcOv98inRIq+zmkpIYevMS6n+FIh7i
ZQKX4wXeEUifoQTaEj+0K8xtIp8Fr+cJcZVga2HsmBkVfUUo3ABiihFwfIDiIrNFaMuY/LMc
9uT/lN2jhBqzv5LNJvLHdZJ5sk7+iekx5L3108nh5mvJxLQYcvWgWPJOYyH5eOs88t69M+j1
OPLCLR4ybqCbvFFTQI48cC05eN8M8ueKceRPfzxDfL5/kILB8fRaPjl4byFpXz6KfPTeO+TN
53YTb9V58tLtI8meyjHkt4uyyOm/Hycn9u8ld678jGweE0OempJAnpmaSLaMjSUvPvcxWfb9
j8iLbWfJqQ/eJyXLjpEbl+wn1y98nRTOe4VMLPo9yZ35azLsml+Q9PyfkuTxT1EuFIhOUZRJ
2dnZk9gRkJ+ZmZnPjoCrRUfDE2n8iewImEDjT2BHwHjR0fA4Gn8cOwLGjB07dgw95gE8I3Ny
ckeN1hwNK1lDhw4bnp09gt43ggYHpWdkDL4qM3MIzWeIoiQNSE5JSR2YpjklJjYuPkFJVILO
6XIrknNIIT0fYhW5PxLbv8ygPb1CsiHMeXkMeDZY4KTYhw3V9bVin1ZGcT9FNaT1JMjE7ttU
/vTsmsPPz+bXGBZ15pDqllN/KWmkLeU62lauU1vLOK2/VbkfC21JrOAPJ5fVccMoemKPQVhs
vzKFdEXdZYDucnqgux9T3AFp7YR0Rd3dIbSBZrqrpP65VGMNFB7aazWSNfSvnOryXlWHMVAO
fnSDn9eJeL4vdSraZp6gX3E8xW1yCJzr6OhQ9cTLPp4il+J6nZ5EvSwSxnEs/iiKIjg/FuqP
X/f5fA79WIHnza7p8yY281aEvI3SzbVZplyDMhmlq0B6ORbT5fFzhXRHh+redMxbx+zWpXF+
klAOHk4N2kZA6Ez9RUZ+Pixj46SpwAdGfuO+zaPajto4dO6Z+b9+5SoqKpq9Xm/g7rvvDqxa
tcoQ7Hq4NKqqqprvueceda5j/fr1nVBbW9ul2mj+zWyt4L777gvcf//9Eurr6y2pvaampnnD
hg0Bv98f+MEPfhAEk8GqPqgMzez+TZs2BX70ox+paG5utlXttAzN7P5HH300sHXr1sCDDz5o
22yo3M3sXjZ/+8gjj3TL7B5++OHm7du3Bx577LFumy3Nu7kn9zNH72/uT5wRn7nPhXnmlp/R
uuOS1Gczhq/z+e+io2fPfzOUnj3/if0oHzvEGPTrF3/zG6lfL4K+o9Ri31oEfWCZrl/nyuhI
SXHon0ODYwp6TZ83sZm3IuRtlG6uzTLlGpTJKF0F0suxmC6Pnyuka9SvO3X9ehnETwa5WH9+
sy6/NEEXi4SuWCxHifrMuY+ZYVh70I/zykDmaot1UgZ5+kzsQT/Oc4YZ55XB0U7eipC32TjP
TplyDcpkNs6rhrqrtmgP1ZC+r5v2UAb2UGFgD2UG9iCWg9nDFHLetj34QOaNFuvEB3k294I9
+OBoJ29FyNvMHuyUKdegTGb2sBHqbqNFe9gI6Td30x58YA/rDezBZ2APYjmYPVzTjfahGWTe
YbFOmiHPll6wBz5AspO3IuRtZg92ypRrUCYze9gBdbfDoj3sgPRbumkPzWAPjxnYQ7OBPYjl
KFGf/ezbQwvIvMtinbRAnq29YA8tcLSTtyLkbWYPdsqUa1AmM3vYBXW3y6I97IL0W7tpDy1g
Dz8zsIcWA3sQy8HsobAb9tAKMrdZrJNWyLO9F+yhlY/NbeStCHmb2YOdMuUalMnMHtqg7tos
2kMbpN/eTXtoBXv4vYE9tBrYg1iOEnVt1r49tIPMr1msk3bIc18v2EM7HO3krQh5m9mDnTLl
GpTJTF5xbtmKPeyF9Pd10x7awR5eM7CHdgN7EMvB7GE62a/aA7cBPkd/zGRO32HDdo5DGrlK
53UNI33w+Lco2rx9T23HTl2UKp3ztlIXfVH+0l4ov5g3sZm3EsbGj4O92SlTuq5MVvTK3z1x
hnn3RFzHOq579+QWxfzdEyfwhyED4g2nxxRdebIE3XEO6W2UcWg25VC87j2Jc2Hek8D5st6d
L9OvM4Zrn1i1iLacAbY8zqItZ0Ddj9fxU1hKkfjpMrF3l0k7ok9Pz3dXL7Z3+rJYkVNc0xT1
b8XPZH2B4gTFVaD3MTq982tpAudOgN5LQda16npqHWmgo9s59Ogl8yj3ysgUysYGGqohVWQS
RTzcz9fA43X+eGFNXLzG18hdcBTtKdOg/Hbma4/zNUvF2toij8/qqcjE5vTzta4w87V2bUSf
t1G6YpnG2ygTS39CF+leb1NX10O6RTZsWuwLmFzZ9DjToC8Yb9AXiPphfcF3yYFAnMk7XGZt
UBGUsdRiGYsgz7IItUEdWVnm9kWvdde+liqsh5LLEgk5j8O7Y3Z0vgTkLetmWym0G46etqG3
QZvIhD0DdqdvQ2eD7GIbWgTcKA3OFc0ItndmsnZlu2Wgx2qLeiyD+vb1g/5TX5aeyBkwKHdQ
5/SaqPNqmzqvBnl9UWS7t4Lteg1s91YD2y2DMlQH10Gm9dh2faDHjRb16IP6bu4HtqsvS6Rs
d6NNnW8EeZujwHbLwBZXUZyk2GBgu6t0Y4QTYDelUGbtHeoDgZ7YbTPocIdFHTZDXbf0A7vV
lyVSdrvDps53gLwtUWS3frDbbQZ26zew22Yow45estsW0OEuizpsgbpu7Qd2qy9LpOx2l02d
7wJ5W6NorPAEjBWeNbDbJwzGCi1Qhl3BscKUHo8VWkGPbRb12Ar13d4PbFdflkjZbptNnbeB
vN2R06ze20GG1yzK0A662tcP6l1flkjUu105j8MaWqlNOfuqzaqENuhlon2r9ppBm/UyyCO2
We1Qhr2QzmT6bJ5PCoPtlquL9svo2yWnwboe1yvT2wRBft73Vwo6fh/mt/g9H1D/RDXNDiGW
8fcIZk6sGzOZ2HcRJT/pWo7ufhex+xlCeBrMPriffxfBrnd2/fO7CHTormRXVVV1lH1Pg3uw
IBB9C8YzxjeRf16v99C2bdsCH374YeDcuXMIBKIPwXjG+MZ4xznIeHnixAn1t8vfeustBALR
h2A8Y3wT93xl/SPj5969exEIRATA+Kb//YHz588H9u3bh0AgIgDGN+QgAoEcRCCQgzIH9+/f
j0AgIgDkIAIRfRy8cOFC4MCBAwgEIgJgfEMOIhDIQQQCOShz8ODBgwgEIgJADiIQ0cfBL774
InDo0CEEAhEBML4hBxEI5CACgRyUOXj48GEEAhEBIAcRCOQgAoEc7MzBo0ePIhCICAA5iEBE
HwcvXrwYOHXqFAKBiAAY35CDCARyEIFADsocZHuuIRCIvgdyEIFADiIQyMHOHDx9+jQCgYgA
kIMIRPRx8NKlS4EzZ84gEIgIgPENOYhAIAcRCOSgzMGOjg4EAhEBIAcRiOjk4Oeff45AICIA
5CACgRxEIJCDMgcvX74cOHv2LAKBiAAY30QOst+m/+STT9S1e9QPAtG3YDxjfGO84xy8666q
I48//njg5MmTKj8RCETfgfGM8Y3xjghu+fLle5qamtT+EYFA9B0YzxjfCDp06KLCLaQopiig
cFN4KBRAqhDvOMUEg/AYimEULjivwPHVV18lo+kxCa4NhfQccH0ahI9CmMeNJcSfJ9yXA/4A
dSPpMY4iDc6xvAaDn7mlbH5J0e67QOOL5WyDjJ0OJWcxKaXlLCXlpIbUqz4vqSM+UmVDb/Pm
LGsqiZvFVEaqpi5rmq2mUE5Wq1evI7s915G4xDzyQs7DTub31VTWekZeR0tHyFkmOD2y8/VU
rhlLRjt3XnrafU6VMY8o9Pr5h5Y1cV210TTA61gxfDTzf8nuXw3nA7Fa/AM+8nL1uNFOBfTM
cdnD4mlaZfGY/0t67mTyFvfWwiQ1Tub0JPLG4u813bmxUPmK6o6ViZ1/dloS2bI3r5HdU7lO
VX/wKNYv173bQPfbFdR9X+meKYHzYqXAi4GCf6HAZRY/Q6g30T+fIh3SKru5pCSG3ryE+l+h
iId4mcDleIF3BNJnKIG2xA/tCnObyGfB63lCXCXYWhg7ZkZFXxEKN4CYYgQcH6C4yGwR2jIm
/yyHPfk/Zfcoocbsr2SzifxxnWSerJN/YnoMeW/9dHK4+VoyMS2GXD0olrzTWEg+3jqPvHfv
DHo9jrxwi4eMG+gmb9QUkCMPXEsO3jeD/LliHPnTH88Qn+8fpGBwPL2WTw7eW0jal48iH733
Dnnzud3EW3WevHT7SLKncgz57aIscvrvx8mJ/XvJnSs/I5vHxJCnpiSQZ6Ymki1jY8mLz31M
ln3/I/Ji21ly6oP3ScmyY+TGJfvJ9QtfJ4XzXiETi35Pcmf+mgy75hckPf+nJHn8U5QLBaJT
FGVSdnb2JHYE5GdmZuazI+Bq0dHwRBp/IjsCJtD4E9gRMF50NDyOxh/HjoAxY8eOHUOPeQDP
yJyc3FGjNUfDStbQocOGZ2ePoPeNoMFB6RkZg6/KzBxC8xmiKEkDklNSUgemaU6JiY2LT1AS
laBzutyK5BxSSM+HWEXuj8T2LzNoT6+QbAhzXh4Dng0WOCn2YUN1fa3Yp5VR3E9RDWk9CTKx
+zaVPz275vDzs/k1hkWdOaS65dRfShppS7mOtpXr1NYyTutvVfnZ0QlH7g8nl9Vxwyh6Yo9B
WGy/MoV0Rd1lgO5yeqC7H1PcAWnthHRF3d0htIFmuquk/rlUYw0UHtprNZI19K+c6vJeVYcx
oC9+dIOf14l4vi91KtpmnqBfcTzFbXIInOvo6FD1xMo+imI8xfsU1+v0JOplEfRtPD4bCxbB
+bFQf3w86PP5HPqxAs+bXeN5H7OZ9zGDvI3SHQXpHbVRpushfZ7u6FAdmY5NeRyngY5ZPyDK
UwTlLLUoTxGUs8xEx3xYLerYisxcTn16HVlZpnXGrnE5jqqjLetl4fHFsvREzoBBuYM6p9dE
nTP5jtjQeSnIa0dOkctCm+YQz4t2YsVfBu0We85iwj4AYxSxDPxaMsjqgvhFYMel0H/crLZc
K9URt4fU0jG3h/pqSRNt0+Kh3U8U+gCXrm8Qwzy+WZm74kAZ2E21xfooA7vxRYgDdtotO2U5
ZlCWSHGgGmzaqs6rQV5fFHDgbbDpW6FP9xpw4FawR5EDZVAGVpb1ap8a+ssNsmAlHQ2xJ9JV
1L+alreGpl8ftHc9Yg14oR8/8ThOg/Pd5YwP7GyjxfrzgZ01RyFn7JTlmEFZIsWZjcAZqzrf
CPI2RwFn0hWNA6ugDBsMOLMKxisiZ3xQBlaW7Qac4X2Gh/7vo6Piaurz0Z5lLT1fT/98Kp+8
9GwljJpJl1zS9ysu8Dt18Zy6PipWxz2njp+iv7u8awZb3WHRBprBVluikHd2ynLMoCyR4t0O
sFmrOt8B8rZEAe8+BB6xObB/o9hmwDs/lF3kXTOUYQdc1/OugnKKzZrWUgZ6Kbe0Z9GV5G4a
qqA8q7fAs1gDuEz8+j6tpzxqAdvbZbFOW8D2WqOQR3bKcsygLJHi0S7gkVWd7wJ5W6OAR38D
XjxB8TSbDzfg0RMwfyPyqAXKsMtkzFdJ+VKu9lv1ZBL1r1N5ZZ8/Rrxx9yJfWsHG2izWXSvY
WHsU8sVOWY4ZlCVSfGkDvljVeRvI2x05zeq9HXT1mkUZ2kFX+6Kw3u2U5ZhBWSJR7/r5Xis6
3wvy7ouCdrIV2r2XYa3gNYN2kl1L0bWT7VAGVha2drpYHVX41CdhbWwhrhbI425nmHbQLcx3
87hmZRf1I/qTYZ2Dr82lq88DbOa/tLFunW9d+WpPbZVnvu+uqd8mCWQYLe5Sms0iV6gmWVUF
hJXogG5Vuq+cAtrkLlfRaoS7XbS7+stA2ivNWzyfxb7tSYVMcmqrBNKqOT2RRctTTO/v0Gdy
wkX8v3IGZ5r5am8cPDWlCqsCrNa+pZ4ZoNaIQm3fSbXhIC+oNeEgnfMeQHGtmhpfoZ1FJtL/
E+CMQ3gyC5i461Qbc0p6UYS6WAZh5t+pzs84pPhybNEpJus03C0T7jW6/kmwLMSgPHz1JlbQ
Z5H6jotDKIVDZ1XF6igkaJtr62rX1tY1+Gpr6g1uJkLRtZsZPXKZRdc3rrzbW9FQ7ylv8NT5
6lcJd/MUiCtd9YfuZtU/h2bt9VTUrllbTu+rrTG6kbLIKd3I6nlueUM5zXbNmvK6e4Wbgi4u
VM0O9SY1KeOIbqsRY6xGjLUaMc5qxPjOEeeTuVTyeA8h436Hr4ShQ9dfXKCXHX9lqat4khCb
/x3ehOooEs4Wf7DhoaKvWz9KF12lXfc/g4PvXwZfUyHCMohLfSxv1DfLkPNib6WvvMbDe9Fe
KqN/Cn8RLRDKWt8N91HWC4ohEyFrXvJlfZW1VhVnHoBMAr9Sxzsu0nk8zLLWj7aYs3aHw/Yd
Ttt3oFQoFUqFUqFUKBVKhVKhVCjVN0WqD4pn+rWZSeOZ73kWZ76dvfckHXqouEImAEIz3051
5pvoZr5J2JnvFGnmOxVm2lldDAo7852lpj6H/s++52KYC35ttvsm4VFQjPWVQWr8TpzNxtls
nM1Ghw5ns3E2+2udzebdUOfZbCd06H03pUyuUdU/p9NsNst6biSmlOfilDJKhVKhVCgVSoVS
oVQoFUqFUl0RUs0sjvNrKcSrs1ZmL1CrE3P+Pp5GnnvlTCMnkgJQfIIAppFGAPvoiL1k/x9E
23QKEV0YBZPgS6BGM4Qjm22dBHT0/Ets8Kk/n2KrI58cdUwyPKefd+BMLF6r2cb/ULfwYd+Q
jCWhT8n4VL0bkKQuRnDXAjKydNY+wBYkMnUzHGvXahbHFgW0q4oAdvVl6apDW7EJXuU0TPHP
AumIbvrfK0wqs9uShPKJLl5rv1KF7we2qVk6IWGXronbDs3XjmBSzwd9KcWaQC6DJQUukCKo
sFcF4pmTMNpQwFLEzBUpc7YotLCuoXBOnXfe0rIpJQ3emqpJVRbFSQuK4wiKo/RInGGG4tyw
Zm1h6bxJpfMsyjU0KJcSlGtZF3UUF7aOhhrK5Vk6ZdqN10yaYFGsLEmsLeALzdjFQU+n0AzH
GiyefvtbhstbWld40qnBqPvqqnz9vSHtuitshK7w1xSPYdcT9V2hbklR3S+Od4XiAHCUWreK
4Tl9V8jXTovrHUJXyO/kE+wJuol6uStcInSFxVJXGAO5FNeH7g91hbGmV5nh3mZwVWvV3JD6
BKEsVUKzI/Y8PO4wQLDnuVXhpxVdv625FbND/rWC3y/4Nwv+7YL/acG/U/C3Cv7dgv8Fwf+2
4D8o+I8L/pOCn9wQ8rsEf5LgTxX86YI/U/B7BP9EwT9V8M8V/IsE/wrBv/6Gd4NNbahXYJXn
7qJPjzGpVn5fnEG1JgLC9OmPBCOGMt8TFLhh73NB///+2c+D/qu+v1nwrxYKeFPQ//NHv5ot
pBP0f79hoOB/vFgs9LvqSxdphsKaqyvNQF2xJupKDKOuEAu6HnMYEWTPDdH3yBdnusTI3KxZ
bcH6Wr9+9w18L+Du+TV39Mg/Bc9rfs1durjhhlC+s4JxNL9oAyNgvBamBsyNYaiBMdwmPKuI
xlBhYgx8S/bB1gZ6yWreg79WW4gT6jZO4HHXfjMb6Um+76o74GaFVZx5FWZJVbgFfJ0HxQ5a
OXmGg2Lj17a6GBVr1fkNqymZtTgqxlFx16PihD4dFfMeusRwVJxkepUZ7ncNrmpdQIJuPOCA
LiDGYFScgKPiaBkVJ3QxKk40qdZYg549oWej4t0mFbHTpEJFAygR/AViBQmj353iSFjw+4us
j4oTuhgVJ5moKymMuno6Kt48+wpZHSHGJPWb1OkKk/otFvwewZ8qEnC2cb37BX+xZA/dGBUn
dDEq/q5uVMyNoTKMMfRwVJw6++uvW7N68Ev67v18GY/tjooTujEqZt/Z5BqOijt9jhAdA+Lo
qiRZBnlAnERCW5Z5FA046Ow/A+JBcJ69Aj4+pojcF1NseE4/IE4R0nQEB8Ts7GWifWQ1SOh8
7Q6IU/lU7wNGA+KBBle19j1FV1ontO8Z/P0LYU00pVP7DkNeuRV/SxtKLtCThzUjDcTzbQUm
W0pcxQuYn6nBk+C/ifnZC+Ul7lT1/H0UHY7NC/i9bYrn250ISf9b7kgNprk7MZTm8cxQmruT
QmnujNHSvJPllVzSSc4/sTY09uACnubbqYKcuaE03x4YSrMgPiTnEZfn2wNJBfXdSTEn2JKy
NjbY3qrNbP2i2ruuriuvWeXJW1xe0+BdffWc2vXjPA3e+gZPXp2XNsJrvDWV3spxHs+cap+n
/p7G8jqvx1NZ5fGUeGgqjd6QBz4E83hm0ygN1ewEZFWhZuWp993lqfRVVXnrvDUNRTRnNWM1
r6raOk8DPV3Z/VxLfXfla2kU3eitLq+5+oY6b/3q2qarl/lWV9Sup6VXc+r1cryLio6MokNj
jhRh9ftORf+2w3JoCQgZDv/nkXm0CVlCxyC30CbjDtoY1WoNKnmKNrx/pNdeo9dep9f202v/
pX7bSMhZOngcoCSRIYqLDFfiyRhlIJmu5JHnyUloKrkbDk3VcGiomYzzSGhf0iUk9H3oLUT7
jpA90d8BDSNr+Gvh3nhVKq1DYJ35HyEd9pT3GqTDwq9DXCbrfkiH7eP5X3AuVS2BNqRm1wZA
M8qet4bA73ayMgxXtHTYJzdjFC0ua3qnK5o8fBieqnsm4810HJQ9jthqpq2Od8ZqDx9qk8dU
4Hf4b2R+JtIKQoLN4iuK1iyyLWf9ruKbukpzpyOUJhkQSnO3EkpzhSuU5ivx4dMsZH2b+3hI
zkwtTfYGU3HMKzfxn1KjdRT0+6l/oDo8ZDkXTs8vnDJllqcgv6CgYDL7jb7veuuvmZk/fcZk
3UkauKZw8pQpBfkzZ0yZVlN/c+27vZKKMcFmEXOCic5N/xRq1nG0iC5avtBQPYNeyaLXhtJr
ufTaWOHaeGr8k+m1KfTOGTSHb1E8T14AGZzCs59LWPUQf/QtBgyfb4ybBvclgCG7oUayhKm5
oXAvI0ou3JsMluEEwowX0psM9zLCTIE8GWFmgPGzfL4Ffk6YgSaEGRCGMGFerTKaehKrydpb
X+bPYy6a6QjD5zHpK+8unsUslO3rrJu+4bDc25k/ix0H4OJE/3kWEx2z0H/S/cyu/hx/FkvT
MUJ7FmNn24Qr3X0WGxT2WSzd9Coz3NtNn9TSdLpwQYuWYPCkxuPyrcqDLdrtwdN8eZt2tGqX
+89s5pLsVv2n1JbMpT5V/TtTuWOPev4p9YmstdMT0xr2BBS7dsFAson6fkhxc+Oald461orV
1TbVe1SnrreuXM0Gw6t9Nd7gWTVGk6+h2uNbs7a2vt63crXXU8maPYhQ4a2pr63zVoYWa+FC
pbe8obp+kncdHaDWw4fAfBT7bhTJEuoz0oQ+44ed+gxP8J2UZPo3mFJhJB3JDqEjVe0V7nra
nD+v7msv7mKeDLWQDAMDvm//SGEsPAQMhv8GbIyamtY98C5zkK7L5AYWb9CtdDYw02US2eTg
xlALDn51JAijS3GkqcZRyE16k/OoHj8dwaWCWFPpOKqgYMqUyTPyC99Vf4wgW3c23MKIWDFJ
uoURsWIc6p+LyqCNtxzQLrkMKoZ/ri7+SDp/wc4pjKdccJ9DGFe5hIpJN6mYZEsV0/WCjP0a
StNWn0J9tdN/o76G0jQV0BpKhlZq6oxrJhdMLpheOPldMo5oP+4QOmdpyUKspgTdkoVZNTno
OQWqydHNanIIQ1xFqCZxyHm7bqmEV5PXUjV1uVTSMx6p5w1qaY7a7KfSpjsdHjNpjcwsmFlw
S02lt4o2jZXvqiOw8QZXrCxQiBWWqlugCMcrBUob3wu84hXGf3Qv3EA8mcZgDWdJXS1r3j2+
mqpaz2TaSdBRJu0yKmpr6hvKaQtvMhR/ViemHbHkCrHTv1wJb8+LQ/EFAnDIG73gDc4Cm+8J
NRq8J9Ro8p5QcCedBxxq2Pg9oSRd7h+r+VeDnFrIJ4XulkKrpNBqKbRGCtVIoVoptFYK3SOF
6qRQvRRqkEKNUmidFGqSQuul0L1SaIMUuk8K3S+FNkqhZin0gBTyS6EfSKEfSqEHpdBDUuhh
KbRJCv1ICm2WQluk0CNS6FEptFUKPSaF/ocU2iaFtkuhx6XQDinUIoV+LIWekEJPSqGnpNDT
Uuh/SqFnpNBPpNA/SaGfSqF/lkL/lxTaKYX+RQr9TAr9XAo9K4V+IYV+KYV2SaFWKfQrKfS/
pND/LYX+VQr9Wgr9Rgr9VgrtlkL/jxT6Nyn071Lod1LoOSn0vBT6vRR6QQq9KIX+IIX+KIXa
pFC7FHpJCr0shV6RQn+SQv8hhV6VQn+WQn+RQn+VQq9JoT1S6P+VQv8phV6XQn+TQm9IoTel
0FtS6G0ptFcK7ZNC70ih/VLoXSl0QAq9J4UOSqH/TwodkkKHpdARKXRUCh2TQu9LoeNS6AMp
dEIK/V0KfSiF/ksKfSSFPpZCJ6XQ/5ZCn0ihU1LoUyl0Wgp9JoXOSKEOKfS5FDorhc5JofNS
6IIU+kIK/f9S6Esp9A8pdFEKXZJCl6XQf0uhr6RQAELy1B4fm3ae2isWpuf4ywja018RkX/F
LZnIH5e7hKe/ok4LDmz8PweeLUy+CmYJ8UxugAGY0XKD/mkpRVgJ4Ksfw+CJ0AlzpPznDPNB
SDfM2scJj7fFXRQwLmwBmUS3snVnC6VLAAmMSpeqe9c3oYvnuRRh9495Jrt/sHGPOuC0UBK9
dr55nzz/XBiqIa7s9ROn8Br4s0oauaAMMjynf2ibzxvHtQ7hXbZbhXVCJ+lq94+fE7PdP+aQ
0A4eSzqtn8w1uKq1ULcKqatnifn+HvO7XvMNNU63wg129/eYH0Yg/fckvSYQz3xOF5nH6TKX
N9QYYTwduaa2YhV7+6i8wWtRtBGk814fc/tCtIUFU6bMmOEpo8JZFG1kUDR32H01Uk321ZjX
W/tq6MuI+2r8BUb9j+Ei/Tf2C8IbSegLQgfp7S8IbyLh9tVYQMx2zuArKFeDxabCKs8C0vkb
wRu792IRy+zGLlr3m0zE+LbBdzmdxbDZur+rvgrU9U2V5mUYYVCGBSZlWNqTMph1A++qy40j
u7wpbClGWvy8ZqDJR+fzuvfRuSiciT6wy8AuA7uMhX3aZSwi4T46X0zMPitfqGvnBkI7t9Cg
y1jY/S5jYRddxiITMRYZNLcLv6YuY2EXXcZikzKU9qQMvd5lLOxGl5Fm8kXmPNtfZBr0Fgu/
0b2F+OrBfwOqhEVTRP96C/gxg7eAHzPoLb5j+EXmd2CpqKdvAZeEfQt4iel7vt/RvZucBta6
zOA9Xx43CxDsLa5XiPBiv9kXmX9Q15DeDn7puNYZ+tJxRVzoS8e1rtCXjn7hi8yHDL7IZKuW
N7lCX08WJ4TSJINDaRYnhtI86Q6lOcPZOU32hsaKlLVqHLbelxfXEfRnxnd0Khc7H5egxWFr
nF8mHA/mdTBxc6f4bE19RdLuYPzUAccXDCT/QYMv9eDDwl7/BC+i3/vpXjEL34uH7x9vKt9Q
XlfpWVre4KsN6ummcm9N/Qbv6nEefqG8ptLjow9Fdd4K39q62opydm1m4WjPnAXqy9sslpzU
au3byrBJvIv12C/qMTTC+o4wU/xSp+9PV0O7F/r+NItMpw3mHDriupE2kCV0zFgO359uIUPJ
s/Tabnrtd/RaO732Jlz7gqQQt5JNcpVsNTybHu9UhpH7FO3Tsq3KYPIzGn5ebUIyTL5HzQKZ
pwvfo84RPqe7UfgetUT4HrVc+B51C7znnABv6vDvUXcLq8q/E75HbRe+R30T0kmFlfYUuOZW
tNfjWeeSC/50ou2ikQ3fCLBve4fBNwX3wbepmWrJtXPsm4KfQRw+Pi/Rjc9557XY4B1oC51X
f/tOdaz6jdvOYCfY4Uhd0GW5YrX4TI1vO1eEja9udeBib3OzrreMPQxMzr9mmv7j08nT8qfP
7HRyJg0F3+2eXJg/eerU/Okzpngaaj1Tp+fPvEZ4I7wvUzcmehkxJ3pvfAfrJpPgJWyifr3o
JtepBNLcQvU99Gj5LtYN6U0C0mfA95ZuIOt1cN8QePKLFwi6xISgJX1H0P7q+EerhGgfrd6n
VsPmLgnqVxhB+dQCZcm0aQWF9DClYMY0RoeC/CkFMycLbLMc1Zg6Iy1Sp7dcLP0bGAxlqtTh
+zJkCG+VD4bjQDDVTAufZwwy+U56nt3vpMUMe6OIV5qJdv2dNM6n998Zkk8NZkg+NZghWWo4
Q7KU9M530qVhZ0jKTGdIlupmSAZBH/YdgxmSpUKDg19CR9GX0EtJ9H4JXaobJHEDu9lgkNTZ
wCytlJh/zak+ayjCF5yCX//9rd780tRnHPbN7QDo26ZcM5MOwqdOnvmu+gN6eeIpyyszYl3F
61Zm9B9xKvQOJfjlrVbIrr665UcnCX0tKf4SCf8Cl38tKX51W2ZSV0t6UlfyilCkvrydcs3k
qfKXt6zvnmxwxcZ6lFh3qbr1qOj6ADfN8s81ximhRd1v+le2g0gB/b8uZmvChgGzUrhe1pMp
6teD7Au/JKizSvWobYb9z2SqYNLi0npou2wjl0iNNU4YIAwmY1S9x8CjKd8aiPtvg5oYr36d
Vi3wXLzjq0BnF9vFdTFlo+uPq9auH/1nSGd5X3EVmdWppN8plsNlQjguVrtbgVQchil8V07B
/z0hvNul1YlmtS5qtd1LwQn2HUtr5Rcqmx1dPBL0Zqxf+5OIlR92DedaLeVkLd0EW+my2L8u
lsugWM5LsZWX9XQTbaWbaFAGh+W8HLbysp5ukq10k3RlUPqBLSn9wJaUfmBLjn5gS45+YEuO
K9aWRvs3GFwrK75q9Z8Gr/7TL4tC4wHxt0AK1DlWzU0t7iyxSb4BPgIlwRFoU3CE/HBwIyi9
JJsgvR/BcTMcR4P0SthxRVzs7WGkH2UqvdIL0jNJupLecUVLrxuB0jFck+p+XxQaxZlJv6C4
M1+V3rIcVZKupHeF1f1ulz3dh0bMkdG9+4qWPqZXLacX2xxLlhPbq7qPNGvjrlDpM/28jxsA
xxy1H0sQxha56rRVQqcxx8jgLuPirsEef7Z6fZ37cvy6ZFfqM25PwtLk4ynajMPsFLYrxOHg
nADrfbV0Ugl8Ua/2xulkvbQooHcPQQmM+3Gem9GdnmJNwnhyQ8x/JoxJGJ9YFfNZgiMhJvHm
mAMJWQnZiQ5aO7KEef7t8OR/m/r0TqSFg2m6Rm9usWwD3y1OUF8u4Hzy+/3SkcBMk4uWeT2p
pIl2aOkroatGC4bjgjX/T+qeOHx/aTWfH4YWQUhwxivZ3mqgy6BBF6fOuYvRWym4eKFw+gLk
FReoaT/kvME1GXK5wdWTSidhBnNypWckrU5hlf554k0prNLjk1akKCaVrv1odudKPx8IP/0j
VvqyZf8gO3dqW/3xI9eLs5crneu+R5XutFDpyT2o9Ho3m6bujUoXixu+0nfFaZX+YJxW6T+J
M690zai7rvTpnSr9kWCl/6O42LA82u64vVrpxb1S6Q4LlZ7Yg0p3OyJZ6Q7yQ3dZ/N3JJQm/
dK+Pn588MeEl9/b4/OR02nNNccqVnkP02wUKXVIwl/Sg9OxNKibf5oBWss001j1qilPh+gR/
WnAIOFbbp0t1E+V9AYRdAL7l6bSV/9Ww9TcfCyQHZ4DzhTn6GLKK/j+h2JJCPcYKZWky5YRX
6C/jfpMyP/Hp1P+M25eSk9iQeiLuk5SExOVUUwVK7yi0lWgKZfvEGSlUUf9ckkJZ/DLfGq9e
W0k91pYrjLZYycNr67grL/Ft9zPJLveixH91r0se5q5M/LH7juSeaushJ9dWLpjfJBPzc6ja
SpW0xdIt8dZV0MFjcJ3qanip0NlJczFqbn2hPy3lcPp7KTkp6TcpbQNOJBckPZLy9ICLyTcl
1aX4B/SUvlsTuP7+ANb2BxNrc6r6i5X0x55Svju5zNew2htObSyTvlHb1oRwaoujw+7MFG3Y
PStFG3bPStGG3fquThvWx0tTe/HqAplDeBAQXU+H5EyS8NJvpg8NP4lZkfKv9KGhicZnw3h2
dNiU3tnL0nNJwkmfRH42oDphRdrSxL8O2JowKy0/8aXkZxNGpQ2mDYXH1T2TnQRSFQSXp0NN
pmakLtVI07S9WMFIjX/U92p43UUR7DUfHuGc6oa3a8hCdTvbnnUmhGjlDq+rRwacTUhNP5L4
mwGDEz8d9ELiL5PzE/cP2tljXSmgq1gDXbnV0g+VdNXFj99GTmmaAroysPsTXelVSX8dsDPx
+KAbkl5KfiFxz6DxST1VWjIo7TYDpWWrpc+SlBb+12YjaWis/MY6yyz2q++HbFZ+oL0If8Pq
8opVHval0LJqX4OXDqVd0Gb8kHhiwo8qrSwCidMX7CmPPd7v37+frFixQg2z48mTJ6UnwSsh
Tn90WD/o0KGz4z7189cGT5NiZ2jOhj00BFA96NDZcqdJqkt+gSvQD3tnjINxMI71OKG+1SH0
ragpjINxusMiJ7II42CcHrLIhc956NB18zmPs8iNLEKHrocsikEWoUPXQxbFIovQoeuW+7TY
X/xg8DWR0JYcPw9upa/N6D+rvtzB5vGEd4LV90DipatxJPj2sXqVhdNgew9nF7/HyN64CG7v
ob19UcLPfz3aKZa/2uHKiZBA8vYerk7be8xVX8fJ7IPtPVjVDVZfDXKoGw3xzTgWCP6d6hX+
ca8Y67LBlhwLdNcTQnZCtC07koj83npG8Aw7spcNjbbJ0H/sdrMQ1j7NHaKWaCgZRoZ3c6ON
LDWFbDKCeLqZwlCibcaYQ3Jxqw7cqkN1uFXH129LuFUHbtXRW7aEW3V8/Vt1DCX60cBA1f1L
727VYeC6+nSbSdLVh+fDwo4rem2zi25Ib+Wz+eFXtPTZRD+G65OtOuxLb2nDhRFhdd9rm130
ke49V7T0I3vVcnqxzbFkOTm9qvtIszb3CpVe26rDJfTXvbtVB4GtOo5EdKuOI5a36mhO0rbq
uD1J26qjLik70ewD/gHqvEPXW3VwLvV0q47iaNi1IdxWHU5BeNHZ+YD/iLu3tuqwvmtDWby2
a0NBvLZrw03x5rs2JKlTSpHbtaE42ndt6I1K/7dv3K4NmT3atWFeH+zaQK7sXRuGXEG7Nux3
5SX+2f1M8peuRYk73euSU92ViZt7ddeGwWB+OSbml4W7NvRo14ahV+6uDQR2bTjS7V0bhvby
vgdHLO3a8ADs2vDzHu7akP217drw6SBt14Y9g7RdG3YP6vmuDUlgqGyVS/9R/TDVSEdIH9Vb
+O3zyG7hsNvCbgSfDtJ2I9gDuxHs7oXdCAaA4hYYKG64WvqRkuIs/eB6ZDcl2I2bEuBH73Yd
1g86dOjsONyUAB263nO4KQHGwTgYBzclwDgYBzclwDgYBzclQIeuvz3n4aYE6ND1FotwUwJ0
6HrKItyUAB267rnIbEoww6+di1ff5i2pq73bW9Hg8dVU1Xomm+xOIB675fryNd8I706gvcTD
swoVakLxGvVF0GQi/BBs8X8PnZvzrlKj6n/e+rXeOt8a9gbk3PIGL6lVv4KYPHVSwbRJUwom
zyQ16s1CtAVzaSS1zmvUt31urm3wrqytXSVdiAvVYujkACkhb13oSrwWvaG2onZ16Kx6gNAj
ZFRo8Yh9zVP0xt/+dr2RLkImOqPY6S8WKqy7Tin+PwAAAP//AwBJvCu1</Template></GraphPadPrismFile>
