# Supplementary material for: Regulation of stem/progenitor cell maintenance by BMP5 in prostate homeostasis and cancer initiation
Source: eLife journal article supplement (doi:10.7554/elife.54542), 2020-09-07
Supplement: fig4-data3 [file elife-54542-fig4-data3-v2.pzfx]

<?xml version="1.0" encoding="UTF-8"?>
<GraphPadPrismFile xmlns="http://graphpad.com/prism/Prism.htm" PrismXMLVersion="5.00">
<Created>
<OriginalVersion CreatedByProgram="GraphPad Prism" CreatedByVersion="6.0.1.298" RegisteredTo="      " Login="Admin" DateTime="2020-07-16T13:20:37-05:00"/>
<MostRecentVersion CreatedByProgram="GraphPad Prism" CreatedByVersion="6.0.1.298" RegisteredTo="      " Login="Admin" DateTime="2020-08-11T16:11:26-05:00"/>
</Created>
<DefGraphButton ButtonID="201"/>
<InfoSequence>
<Ref ID="Info0" Selected="1"/>
</InfoSequence>
<Info ID="Info0">
<Title>Project info 1</Title>
<Notes>
</Notes>
<Constant><Name>Experiment Date</Name><Value>2020-05-04</Value></Constant>
<Constant><Name>Experiment ID</Name><Value/></Constant>
<Constant><Name>Notebook ID</Name><Value/></Constant>
<Constant><Name>Project</Name><Value/></Constant>
<Constant><Name>Experimenter</Name><Value/></Constant>
<Constant><Name>Protocol</Name><Value/></Constant>
</Info>

<TableSequence>

<Ref ID="Table8" Selected="1"/>
</TableSequence>
<Table ID="Table8" XFormat="none" TableType="OneWay" EVFormat="AsteriskAfterNumber">
<Title>Sca1hi</Title>
<YColumn Width="81" Decimals="2" Subcolumns="1">
<Title>wt</Title>
<Subcolumn>
<d>7.48</d>
<d>8.05</d>
<d>14.4</d>
<d>6.39</d>
<d>10.1</d>
<d>9.19</d>
<d>6.85</d>
<d>3.81</d>
<d>5.06</d>
<d>5.45</d>
<d>3.01</d>
<d>10.7</d>
<d>13</d>
</Subcolumn>
</YColumn>
<YColumn Width="81" Decimals="2" Subcolumns="1">
<Title>bmp5 SE/SE</Title>
<Subcolumn>
<d>7.29</d>
<d>9.75</d>
<d>7.86</d>
<d>8.3</d>
<d>7.78</d>
<d>10.4</d>
<d>13.7</d>
<d>7.29</d>
<d>6.06</d>
</Subcolumn>
</YColumn>
<YColumn Width="117" Decimals="1" Subcolumns="1">
<Title>Krt5CreERT2Ptenf/f</Title>
<Subcolumn>
<d>18.2</d>
<d>17</d>
<d>32.5</d>
<d>25.7</d>
<d>23.9</d>
<d>39.1</d>
<d>40</d>
<d>24.7</d>
<d>12.2</d>
</Subcolumn>
</YColumn>
<YColumn Width="165" Decimals="2" Subcolumns="1">
<Title>Krt5CreERT2Ptenf/fBmp5ko</Title>
<Subcolumn>
<d>15.4</d>
<d>7.63</d>
<d>13.4</d>
<d>15.7</d>
<d>14.6</d>
<d>8</d>
<d>4.55</d>
<d>14.7</d>
</Subcolumn>
</YColumn>
<YColumn Width="169" Decimals="2" Subcolumns="1">
<Title>Krt5CreERT2Ptenf/fR26G3/+</Title>
<Subcolumn>
<d>15.4</d>
<d>6.87</d>
<d>3.88</d>
<d>3.61</d>
<d>7.73</d>
<d>6.47</d>
<d>9.5</d>
<d>9.93</d>
</Subcolumn>
</YColumn>
</Table>

<!--Analyses, graphs and layouts as compressed binary. Don't edit this part of the file.-->

<Template xmlns:dt="urn:schemas-microsoft-com:datatypes" dt:dt="bin.base64">eNrsnQtgVEWaqOv0u/MgJCQQXqFDeBNCnhBGhgQFRHkYIYLDMJom6ZCWkGAeBkRiOyqDishj
5+rOji47jgu6M+qdXR3dIWNmdUZ3HXVAREZkVMZVroJEHt4ruOlbVeev7jonp5PupEli5i/4
cqrOqVP1V9Vf9depU91dctWCBVcvm5uv+OIIITuVnYqJ/q0gN5r+iYyjZ240EY0TYYXyk1RC
WNDkK5lIiIX6rJS1cDxPoziIGsNM8VMn7hSIsIOgQ4cOHTp06L7tzoRVgA4dOnTo0H3rnRmr
AB06dOjQoUOHDh06dOjQoUOHDh06dOjQoYuKM5Mr6d9TQwh5bTghy8yELLZEcj/bb3ezohCr
utPOQv6unxbU5mPbBVzEzgusurl1Xnd1JwVmWxMHSeGd6m5Cs0kZC+moJ1Z46ircNe6QeU+k
DO40Hb7BkSzftH5NbTXpNJ0hhukkQTpmns5Kb83aCkp9J+UaZZiOCdJRq6TUu95T71rqaXIt
q13vrumQTgYlvlN52BbNraT4N0+9+cqRP73+JjFOZ1zI+hHy2Hg6LJnX3/zjf5NO0onrNB17
IB0uTrflUbeSXlXbWOf11LEaIqHSMW6vHEjHqdZznWdNY3mVp8G1ZDkxSGc8JaFT/Ynh5eJ1
00k6ri7LFctPFF/pbnDXrCWRpyPaPU5td97BXDfUeMtrKzwsMa2b2mX/ig/qj1o4w3S6bvdB
ajpv/uy10wd//+/vhUhnSpf1nMDTWdxY7q1wu66uc9dUeEjHdPRupxL0q+kMlvq7q9S71lNH
DNJh9ZzYaT3D1S7S6cyp6SRx/5W1tetcc2savLc2uo3SmRSyvYQ8Q/iYqDb7lbXVFa5rGtzV
3nJdOqdgk7ZwB0x6eZKldJa66+pqm4hBOud16YA89mA6KWr/clfRfk5CpqMfn0Eeqd2Hqv2d
3rumzkvCTaej/gxT67musb7Ktby8zruBdrFSYpROjC4dP0/nSkgnVe2nS9zVaxtrXFfXNlQx
YcoN+lfn+jycn7iedJ4Oc4dTVXN38kG/v6w0YPshnRFyu1e7y9cRo3TOdtnuI0EPK2prvLRm
XFfV0h5WU++p0KQzITByhtLDUQF9puOy6zqqiMsbNlV7iDadNp08N5r06YzmJxZ6qm/zNHjL
3cQ4na77exq0l7e8rra+trLB9T33Qo+X6NLpevwZw0+scm+odM2jBn6Nu6GedEynM3lsxVu4
dWcfq2gO+P4u8OEI1qhqSNGETJqQWROyQOgB7vNRfkwO24Oxui8tOnTo0KFDh66vHTPM/0DE
cskfyG0m3LSJri+cqXiWT10z+5jPTD/ylZFf3G0i4yjy9HEcDbymW67srZ4iL+Rl0BOvSuF9
9MH09/Th3TV/yQIWm8mdbFbXuTRzYXpiBO1wxfT+Nn0mJyzE96SZpMN6VCKsgjjg6WiwVP5Y
XXgoxE2FZ/84kDkF/GZ4ApWfZtMCz53auh0O97CqHR9cifEtJtqZvr4OxP3pmpL5ioz9xk7O
T9SDXB5xTsjuB7dDUZ+OJ8J5oTNtbW2adNl5o3JMkdJ6iIYzo1iOULLWMfmSlC7loGeUruQQ
3YDpaD5lL6WEpi3SYCs9wq8QF9eHkiSjBzO/+I8OHTp06NB121VWVh5vbGz0b9iwAUEQBEE0
MPvA7IRsNzwez3sPPfSQ/+OPP/afO3cOQRAEQTQw+8DsBLMXwnYwe3LixAn/qVOn/G+99RaC
IAiCaGD2gdkJZi+E7WDPI8yuHDx4EEEQBEEMYXaC2QvZdpw/f95/6NAhBEEQBDGE2Qm0HQiC
IAjaDgRBEKQvbMfhw4cRBEEQxBC0HQiCIEg0bMeFCxf8R44cQRAEQRBDmJ1A24EgCIKg7UAQ
BEH6wnYcPXoUQRAEQQxB24EgCIJEw3Z89dVX/vfeew9BEARBDGF2Am0HgiAIgrYDQRAE6Qvb
cezYMQRBEAQxBG0HgiAIgrYDQRAE6Svbcfz4cQRBEAQxBG0HgiAIEg3bcfHiRf/nn3+OIAiC
IIYwO4G2A0EQBEHbgSAIgvSF7Th16hSCIAiCGIK2A0EQBEHbgSAIgvSV7Th9+jSCIAiCGIK2
A0EQBImG7bh06ZL/zJkzCIIgCGIIsxNoOxAEQRC0HQiCIEhf2I62tjYEQRAEMQRtB4IgCBIt
2/Hll18iCIIgiCFoOxAEQRC0HQiCIEhf2I5vvvnGf/bsWQRBEAQxhNkJ2XY0Njb6P/vsM/6Z
QawfBEEQRA+zD8xOMHshbMfatZXv79q1y3/y5EluVxAEQRBEhtkHZieYvSCSW7169WtNTU38
eQRBEARBZJh9YHaCoEOHDh06dN10iyjFlGyKleKiKMBgKd44emKqQXgCZRTFBOcVOL788stk
PD3GwbWRkJ6INwPCD8ANIq6dEN8k6b6x4PdTl06PDkoSnGO3DgU/c8vYe39Fve8CjS+X8wBk
bDYpY5eQ5bScy4mb1JB67vOQOuIllRHU2/yrVjbduHmymfkr81c2zeUpuEk1v/q48qzrcWX7
qF1mVqPMz2Q9SY9xrl3mySzKtXH8/FPUWzY6y8yuT1Gg7tkfnwqLr7YKd6ajv5rA8vySXbPw
a7RuaKWdv2dl0/UbSHqJY7ZVkdqQsT1NpBHH4zH/Nnru6PZHraupHFy2RXHkjSXfbyo4M1Np
p3XHysTON9Dz9x2c1MjuqbiNV3/gKLevqHuzQd3vVLDuL1fdMyFEv1gj9YtEyb9I6susj6fA
NYvOv4CSDGmVLi0psdGbr6f+VooT4qVCX3ZK/Y5A+owSGEt8MK4wt5V8Ebg+SYqrBEYLY8fU
qKj9a0tR+xcUQv13jCxqn311Ubt7ZlH7088UtT+j0PMxRe1WMqa93Mzi3UnjXWS6CGMZk3+2
KTL5T7F7lOBg9geyLYT8jg4y5+jkz0y2kXc3ziTHmq8gmUk2Mm2InbzdWEA+3T6fvLupkF53
kBducJHJiVbyRk02ef/OK8jRzYXklfLJ5He/OUO83q9J9lAnvZZFjm4qIC2rx5FP3n2bvPnc
s8RTeZ78dlU6ea1iAnlm8Qhy+q8fkhOHD5Kb13xBtk2wkYdzY8hP8mPJfRPt5MXnPiUrf/AJ
efHAWfL5Rx+QkpV/IVdff5jMWfQ6KZjfSjKLfk0yZv2SjMp7giRnPUoGTXmY9oVs2SmKMj0t
LW06OwJZqampWewITJMdDWfS+JnsCEyl8aeyIzBFdjQ8mcafzI7AhIkTJ06gx0mAK33s2Ixx
41VHw8qIkSNHjU5LG0PvG0ODQ5JTUoYOS00dTvMZrihx8YMSEgYnJqlOsdkdzhglVgk4s8Wq
aJxJE9L3B7uitUfy+Jca0KdWkgZh0S+3K2o/Gyr1SdmGjdTZWtmmlVK2UZ6FtC6BTOy+re5H
5tYce36uuBZDWdyxD3FXxnWziY6Sm2i/mEuWkuvICnq0Q19gRxuMAw445wS/owsZI5lDvGYQ
lseyVClduR5ToB7H9qAeX6E8AWmxsS1dV4/iWnIn9dhA/UtII7U1DdTmbKBHDy1vOakl62nI
zS1RPQ0x6+aEOjVB2UxS2AbnbIBD8ou4Vumc9TK3gazXk6T2kOdiQp+Hw7m2tjZer6KuplAy
KHN09SrX42JpDsjij6MUwfmJ0N7iutfrNennGSJvdk2fN4kwb0XK2yjdjAjLlGFQJqN0FUhv
bJjpivgZUrrjg20fcr5cR497Lao+T5fKIcKDA7rhlwyxr8jIL6Z0bI6Vz9Il6mBhbBddXHf4
YNLRqov/A8qVl5c3ezwe/y233OJft26dIex6Z2lUVlY233rrrXx9b+PGjR2ora3tstpo/s1s
P8LmzZv9d9xxh4b6+vqwqr2mpqb59ttv9/t8Pv9dd90VgMkQbn1QGZrZ/Vu3bvX/6Ec/4jQ3
N0fU7LQMzez+Bx54wL99+3b/3XffHbHaULmb2b3sXdv999/fLbW79957m3fu3Ol/8MEHu622
NO/mntzPHL2/eSD1Gfl5/Vwnz+va57vuuDj+XMfoy2fHc6aePTsWKj17dpTtqJg72Azs+sWn
n9bY9SKwHcvDtK1FYANLdXbdDNfbEhJM+mfYwJyCXtPnTSLMW5HyNko3I8IyZRiUyShdBdIb
G2a6In6GlK6RXTfr7HopxB8EcjF7vlSXX5JUF4slUyyXowSeV+1d6IN+nlcKMleF2SalkKc3
hD7o53nmTuZ5pXCMJG9FyjvUPC+SMmUYlCnUPK8K2q4qTH2ogvS93dSHUtCHcgN9KDXQB7kc
TB9yu6EPXpB5S5ht4oU8m6OgD144RpK3IuUdSh8iKVOGQZlC6cMWaLstYerDFki/uZv64AV9
2GigD14DfZDLwfQhrxv60Awy7w6zTZohzz1R0AcxQYokb0XKO5Q+RFKmDIMyhdKH3dB2u8PU
h92Q/p5u6kMz6MODBvrQbKAPcjlK4NkvUn3YAzLvC7NN9kCe+6OgD3vgGEneipR3KH2IpEwZ
BmUKpQ/7oO32hakP+yD9/d3Uhz2gDz8z0Ic9Bvogl4PpQ0E39GE/yHwgzDbZD3m2REEf9ovn
iwjyVqS8Q+lDJGXKMChTKH04AG13IEx9OADpt3RTH/aDPvzaQB/2G+iDXI4SeK8bqT60gMyv
htkmLZDnoSjoQwscI8lbkfIOpQ+RlCnDoEyh5JXXosPRh4OQ/qFu6kML6MOrBvrQYqAPcjmY
PswEfRA6INb0tyvG7wBMEepOJPWxA/L8AN7H9FR3Isn7uEHe4bTF5Sj/8T4ov5y3EkUdZ+km
68oUTr2KfSvmTvatmKV3LkJ+sW/lg072rZih/5R2UZ7nlWDeog/pdbQE3uVYdHssznWyxwLX
y6K7Xia/l/T5fJ2OT6xZeqLLKdD2U3T9U3qVoumflhD6bgkxjujT0/d3SxTHO31ZwpFTfv/b
3fXKSOt8CshZFKLO9euVlk7WKyOtI33e0UhXlOk47NGLZrpzIN2iCNo03LFwisFYKNePPBYa
7X+KVh8sgjxLe6kPto0YEVq/6LXuluV9GuG7urL0Rzl3wD6z9yOUU97/II0bpqEGY4g5TH84
usps7Vydru4EvWF9Y3mItXW9nNHW21Joa+8AsB36svRETr9BuQN1Tq/1pM6rQF5vP9DbG8PQ
2xUgu6y3pVCGqoDeZnO97U3d9UJ7Nw8A3dWXpb/q7haQt7kf6G5FGLq7DuSRddcLZdgC6WST
LEoB110L6HBv6nEztP2eAaDH+rL0Vz3eDfJ2R85otfseqKv9A6Dd9WXpr+2+D+Td3w/Gr21h
jF8/JsE92mL82gNlYGUp43uLPfyzMS4yj38qppKOZ7HSOCbGNSfkLbD04hi3H/SjZQDour4s
/VXXD4C8LX04xrVAXR0aAO2uL0t/bfeDIO+hfjDGbQxjjHsJxih5jGuBMrCyrKZM47O0mXSW
lsffD1mkcc2uI1RZjD6HYzZ4zyTk3AFrYSKueHaX550ZsN4k7nmIhjN5mm1SLOP98aGc3F6h
ZGL79NuSlC7l6O4+/RKatkiD6Yzwi336JUlGn8MbmPv00aFDhw5d77rKysrj7HNJ+P1NCIIg
iB5mH5idkO2Gx+N576GHHvJ//PHH/nPnziEIgiCIBmYfmJ1g9kLYDmZPTpw44T916pT/rbfe
QhAEQRANzD4wOyH/jg97HmF25eDBgwiCIAhiCLMT+t+ePn/+vP/QoUMIgiAIYgizE2g7EARB
ELQdCIIgSF/YjsOHDyMIgiCIIWg7EARBkGjYjgsXLviPHDmCIAiCIIYwO4G2A0EQBEHbgSAI
gvSF7Th69CiCIAiCGIK2A0EQBImG7fjqq6/87733HoIgCIIYwuwE2g4EQRAEbQeCIAjSF7bj
2LFjCIIgCGII2g4EQRAEbQeCIAjSV7bj+PHjCIIgCGII2g4EQRAkGrbj4sWL/s8//xxBEARB
DGF2Am0HgiAIgrYDQRAE6QvbcerUKQRBEAQxBG0HgiAIgrYDQRAE6Svbcfr0aQRBEAQxBG0H
giAIEg3bcenSJf+ZM2cQBEEQxBBmJ9B2IAiCIGg7EARBkL6wHW1tbQiCIAhiCNoOBEEQJFq2
48svv0QQBEEQQ9B2IAiCIGg7EARBkL6wHd98843/7NmzCIIgCGIIsxOy7WhsbPR/9tln/DOD
WD8IgiCIHmYfmJ1g9kLYjrVrK9/ftWuX/+TJk9yuIAiCIIgMsw/MTjB7QSS3evXq15qamvjz
CIIgCILIMPvA7ARBhw4dOnTouukWUYop2RQrxUVRgMFSvHH0xFSD8ATKKIoFzitwfPnll8l4
eoyDayMhPRNcnwHhB+AGEddOiG+SdN9Y8PupS6dHByUJzrFbh4KfuWXsvb+i3neBxpfLeQAy
NpuUsUvIclrO5cRNakg993lIHfGSygjqbf5VK5tu3DzZzPyV+Sub5vIU3KSaX31cedb1uLJ9
1C4zq1HmZ7KepMc41y7zZBbl2jh+/inqLRudZWbXpyhQ9+yPT4XFV1uFO9PRX01geX7Jrln4
NVo3tNLO37Oy6foNJL3EMduqSG3I2J4m0ojj8Zh/Gz13dPuj1tVUDi7bojjyxpLvNxWcmam0
07pjZWLnG+j5+w5OamT3VNzGqz9wlNtX1L3VoO53Klj3l6vuWX2LfrFG6heJkn+R1JdZ/BSp
3WT/AkoypFW6tKTERm++nvpbKU6Ilwp92Sn1OwLpM0pgLPHBuMLcVvJF4PokKa4SGC2MHVOj
ovavLUXtX1AI9d8xsqh99tVF7e6ZRe1PP1PU/oxCz8cUtVvJmPZyM4t3J413kekijGVM/tmm
yOQ/xe5RgoPZH8i2EPI7Osico5M/M9lG3t04kxxrvoJkJtnItCF28nZjAfl0+3zy7qZCet1B
XrjBRSYnWskbNdnk/TuvIEc3F5JXyieT3/3mDPF6vybZQ530WhY5uqmAtKweRz55923y5nPP
Ek/lefLbVenktYoJ5JnFI8jpv35IThw+SG5e8wXZNsFGHs6NIT/JjyX3TbSTF5/7lKz8wSfk
xQNnyecffUBKVv6FXH39YTJn0eukYH4rySz6NcmY9UsyKu8Jkpz1KBk05WHaF7JlpyjK9LS0
tOnsCGSlpqZmsSMwTXY0nEnjZ7IjMJXGn8qOwBTZ0fBkGn8yOwITJk6cOIEeJwGu9LFjM8aN
Vx0NKyNGjhw1Oi1tDL1vDA0OSU5JGTosNXU4zWe4osTFD0pIGJyYpDrFZnc4Y5RYJeDMFqui
cSZNSN8f7IrWHsnjX2pAn1pJGoRFv9yuqP1sqNQnZRs2UmdrZZtWStlGeRbSugQysfu2uh+Z
W3Ps+bniWgxlccc+xF0Z180mOkpuov1iLllKriMr6NEOfYEdbVAWB5xzgt/RhYyRzCFeMwjL
Y1mqlK5cjylQj2N7UI+vUJ6AtNjYlq6rR3EtuZN6bKD+JaSR2poGanM20KOHlrec1JL1NOTm
lqiehph1c0KdsqmHGY426WiGow3q2CadN0F9iHPWy9wGsl5PktpDnosJfR4O59ra2ni9sroa
x2woJYOmN0dXr3I9Loayifg7aMQiOD8R2lvMJb1er0k/zxB5s2ulunYSbdRV3kyP9Hkbpctk
nBNhmeZA+iLd8cE2CjmvFXHMBnXMbIgsTxHIszxMeYqgnKUh6lhMyeU6DkdmIac+vbYRI0K2
GbvW3TZjzwnf1ZWlJ3L6DcodqHN6Ta7z5RHW+XKQNxI55b4sjYEm+bysJ+H4Wf4vwDMaE3Yn
zG/kMohrSSCrBeIXgR4vh7nUUjrmraczTDZbd9HxrZL+raTj3Xo63lVTPDDeMTsSC0c7pGcB
vxn8ZimeWULcE6ouuuobpdBOVWG2Uynok7eX+sblHM/0ZemtvlEVYZ1XgbzeftA34hRV11dQ
PqN4DPrGCrClct8ohTLwsoToG8YzAhc9o8YK9p1NYfcbe4h4ct+Rz+vTMup3PelvXmj7LWG2
vRd0tHkA9Dd9WXqrv22JsM63gLzN/aC/VUP/WQdrDbcb9Ld1MO+U+5sXysDKciO3V9W0H1XR
HrR1nNNA/7urz81Qt7vDrNtm0IE9A0Cf9WXpLX3eHWGd7wZ5uyNnqHbfAzLsC1OGPVBX+wdA
u+vL0lvtvi/COt8H8u7vB+PY+zAu/ZjyIuXnBuPYjyFPeRzbA2VgZbmDcgOdE7B5Qh3956G+
Bvq3gs4NFvAZQxWfKUzks4bFdB4+LzBPMJojGNl8h8HYaIE6leOLtZ7ujpv7oS0PhNmW+0Hn
WgZA/9GXpbf6z4EI6/wAyNsSxXGzBWR4NUwZWqCuDg2AdteXpTfaPVI5WZ0fBHkP9YNxsxXG
wZcoj5GOeiOuDdGNmy1QBlaWBv485iJN1Ocit9HRMYse1/BnrQL+PnE+mc7/ZvxZjI9Oaay0
Goyd+ucpp3RPV2OjXG+yfxCsI4t3S8k8HaYB19VVeGvcdZtctTWeaU3uTa65S69bMddVW+la
Xu7OqfKSGDKKFnYZrbXFlmCDKyb1KCtBb2wQUGDiLpzo8MLtSyHk94m0UeYvWcBij7vbRJLN
6qK15iUwPTGClqeY3t+mz+SEhfieNAcWP8XLS/EiYrC0UM0a6zv8DKsAE83xEoXVxgu8YcTi
uuyYQl0R6G6zSSa8LHHC0d+F+y5sW9jLJRJbGOZAPgpfPhBpijMm6cFdLOTbpTIV8W0TJoC/
abQkB1rWwpfz2T1cO4xiU5VSNLHZq4sljdUN3g3VHld57foN7jpvfW1NvXRzwDnUMLvZxG/m
SRpHNIcb0RJuRGu4EW3hRrSHG9ERbkRnx4gLyDwquYnq3uZ43DmEDt1Acf4ou5t1++HEThe+
ZYicV84rFm662KQo7+szV/fXoxgUb9bO0jU7/Yj0plk4s+Q/r6hYJOP1JDeXli6mMXKK4d1h
ivgOc8R3oFQoFUqFUqFUKBVKhVKhVCjV34pUs4o/8qmLUGXkF3eb+GKfLIN+d+nf8iKlHBar
x2yBUt6xnCKtkMcQ7U5dsftZX7fy2xh5NZ+tmFd0Ugfi/nRNyXxFxn5jJ+dn9GkscU7ILp6H
d8CnxcSbD6EzbAexnK4CK//6ckyR0nqIhjOjWI5QstYx+ZKULuWgZ5Su5BDdgOloPl9IJqSE
pi3SYG9ihF8hLq4PJUlGn47xi//o0KFDhw5dt11lZeVx9u2F+K0qCIIgiB5mH5idkO2Gx+N5
76GHHvJ//PHH/nPnziEIgiCIBmYfmJ1g9kLYDmZPTpw44T916pT/rbfeQhAEQRANzD4wOyH/
ugZ7HmF25eDBgwiCIAhiCLMT+l+EPX/+vP/QoUMIgiAIYgizE2g7EARBELQdCIIgSF/YjsOH
DyMIgiCIIWg7EARBkGjYjgsXLviPHDmCIAiCIIYwO4G2A0EQBEHbgSAIgvSF7Th69CiCIAiC
GIK2A0EQBImG7fjqq6/87733HoIgCIIYwuwE2g4EQRAEbQeCIAjSF7bj2LFjCIIgCGII2g4E
QRAEbQeCIAjSV7bj+PHjCIIgCGII2g4EQRAkGrbj4sWL/s8//xxBEARBDGF2Am0HgiAIgrYD
QRAE6QvbcerUKQRBEAQxBG0HgiAIgrYDQRAE6Svbcfr0aQRBEAQxBG0HgiAIEg3bcenSJf+Z
M2cQBEEQxBBmJ9B2IAiCIGg7EARBkL6wHW1tbQiCIAhiCNoOBEEQJFq248svv0QQBEEQQ9B2
IAiCIGg7EARBkL6wHd98843/7NmzCIIgCGIIsxOy7WhsbPR/9tln/DODWD8IgiCIHmYfmJ1g
9kLYjrVrK9/ftWuX/+TJk9yuIAiCIIgMsw/MTjB7QSS3evXq15qamvjzCIIgCILIMPvA7ARB
hw4dOnTouukWUYop2RQrxUVRgMFSvHH0xFSD8ATKKIoJzitwfPnll8l4eoyDayMhPRFvBoQf
gBtEXDshvknSfWPB76cunR4dlCQ4x24dCn7mlrH3/op63wUaXy7nAcjYbFLGLiHLaTmXEzep
IfXc5yF1xEsqI6i3+VetbLpx82Qz81fmr2yay1Nwk2p+9XHlWdfjyvZRu8ysRpmfyXqSHuNc
u8yTWZRr4/j5p6i3bHSWmV2fokDdsz8+FRZfbRXuTEd/NYHl+SW7ZuHXaN3QSjt/z8qm6zeQ
9BLHbKsitSFje5pII47HY/5t9NzR7Y9aV1M5uGyL4sgbS77fVHBmptJO646ViZ1voOfvOzip
kd1TcRuv/sBRbl9R92aDut+pYN1frrpnQoh+sUbqF4mSf5HUl1kfT4FrFp1/ASUZ0ipdWlJi
ozdfT/2tFCfES4W+7JT6HYH0GSUwlvhgXGFuK/kicH2SFFcJjBbGjqlRUfvXlqL2LyiE+u8Y
WdQ+++qidvfMovannylqf0ah52OK2q1kTHu5mcW7k8a7yHQRxjIm/2xTZPKfYvcowcHsD2Rb
CPkdHWTO0cmfmWwj726cSY41X0Eyk2xk2hA7ebuxgHy6fT55d1Mhve4gL9zgIpMTreSNmmzy
/p1XkKObC8kr5ZPJ735zhni9X5PsoU56LYsc3VRAWlaPI5+8+zZ587lniafyPPntqnTyWsUE
8sziEeT0Xz8kJw4fJDev+YJsm2AjD+fGkJ/kx5L7JtrJi899Slb+4BPy4oGz5POPPiAlK/9C
rr7+MJmz6HVSML+VZBb9mmTM+iUZlfcESc56lAya8jDtC9myUxRlelpa2nR2BLJSU1Oz2BGY
JjsazqTxM9kRmErjT2VHYIrsaHgyjT+ZHYEJEydOnECPkwBX+tixGePGq46GlREjR44anZY2
ht43hgaHJKekDB2Wmjqc5jNcUeLiByUkDE5MUp1iszucMUqsEnBmi1XROJMmpO8PdkVrj+Tx
LzWgT60kDcKiX25X1H42VOqTsg0bqbO1sk0rpWyjPAtpXQKZ2H1b3Y/MrTn2/FxxLYayuGMf
4q6M62YTHSU30X4xlywl15EV9GiHvsCONhgHHHDOCX5HFzJGMod4zSAsj2WpUrpyPaZAPY7t
QT2+QnkC0mJjW7quHsW15E7qsYH6l5BGamsaqM3ZQI8eWt5yUkvW05CbW6J6GmLWzQl1aoKy
maSwDc7ZAIfkF3Gt0jnrZW4DWa8nSe0hz8WEPg+Hc21tbbxeRV1NoWRQ5ujqVa7HxdIckMUf
RymC8xOhvcV1r9dr0s8zRN7smj5vEmHeipS3UboZEZYpw6BMRukqkN7YMNMV8TOkdMcH2z7k
fLmOHvdaVH2eLpVDhAcHdMMvGWJfkZFfTOnYHCufpUvUwcLYLrq47vDBpKNVF/8HlCsvL2/2
eDz+W265xb9u3TpD2PXO0qisrGy+9dZb+frexo0bO1BbW9tltdH8m9l+hM2bN/vvuOMODfX1
9WFVe01NTfPtt9/u9/l8/rvuuisAkyHc+qAyNLP7t27d6v/Rj37EaW5ujqjZaRma2f0PPPCA
f/v27f677747YrWhcjeze9m7tvvvv79banfvvfc279y50//ggw92W21p3s09uZ85en/zQOoz
8vP6uU6e17XPd91xcfy5jtGXz47nTD17dixUevbsKNtRMXewGdj1i08/rbHrRWA7lodpW4vA
Bpbq7LoZrrclJJj0z7CBOQW9ps+bRJi3IuVtlG5GhGXKMCiTUboKpDc2zHRF/AwpXSO7btbZ
9VKIPwjkYvZ8qS6/JKkuFkumWC5HCTyv2rvQB/08rxRkrgqzTUohT28IfdDP88ydzPNK4RhJ
3oqUd6h5XiRlyjAoU6h5XhW0XVWY+lAF6Xu7qQ+loA/lBvpQaqAPcjmYPuR2Qx+8IPOWMNvE
C3k2R0EfvHCMJG9FyjuUPkRSpgyDMoXShy3QdlvC1IctkH5zN/XBC/qw0UAfvAb6IJeD6UNe
N/ShGWTeHWabNEOee6KgD2KCFEneipR3KH2IpEwZBmUKpQ+7oe12h6kPuyH9Pd3Uh2bQhwcN
9KHZQB/kcpTAs1+k+rAHZN4XZpvsgTz3R0Ef9sAxkrwVKe9Q+hBJmTIMyhRKH/ZB2+0LUx/2
Qfr7u6kPe0AffmagD3sM9EEuB9OHgm7ow36Q+UCYbbIf8myJgj7sF88XEeStSHmH0odIypRh
UKZQ+nAA2u5AmPpwANJv6aY+7Ad9+LWBPuw30Ae5HCXwXjdSfWgBmV8Ns01aIM9DUdCHFjhG
krci5R1KHyIpU4ZBmULJK69Fh6MPByH9Q93UhxbQh1cN9KHFQB/kcjB9mAn6IHRArOlvV4zf
AZgi1J1I6mMH5PkBvI/pqe5Ekvdxg7zDaYvLUf7jfVB+OW8lijrO0k3WlSmcehX7Vsyd7Fsx
S+9chPxi38oHnexbMUP/Ke2iPM8rwbxFH9LraAm8y7Ho9lic62SPBa6XRXe9TH4v6fP5Oh2f
WLP0RJdToO2n6Pqn9CpF0z8tIfTdEmIc0aen7++WKI53+rKEI6f8/re765WR1vkUkLMoRJ3r
1ystnaxXRlpH+ryjka4o03HYoxfNdOdAukURtGm4Y+EUg7FQrh95LDTa/xStPlgEeZb2Uh9s
GzEitH7Ra90ty/s0wnd1ZemPcu6AfWbvRyinvP9BGjdMQw3GEHOY/nB0ldnauTpd3Ql6w/rG
8hBr63o5o623pdDW3gFgO/Rl6YmcfoNyB+qcXutJnVeBvN5+oLc3hqG3K0B2WW9LoQxVAb3N
5nrbm7rrhfZuHgC6qy9Lf9XdLSBvcz/Q3YowdHcdyCPrrhfKsAXSySZZlAKuuxbQ4d7U42Zo
+z0DQI/1Zemverwb5O2OnNFq9z1QV/sHQLvry9Jf230fyLu/H4xf28IYv35Mgnu0xfi1B8rA
ylLG9xZ7+GdjXGQe/1RMJR3PYqVxTIxrTshbYOnFMW4/6EfLANB1fVn6q64fAHlb+nCMa4G6
OjQA2l1flv7a7gdB3kP9YIzbGMYY9xKMUfIY1wJlYGVZTZnGZ2kz6Swtj78fskjjml1HqLIY
fQ7HbPCeSci5A9bCRFzx7C7POzNgvUnc8xANZ/I026RYxvvjQzm5vULJxPbptyUpXcrR3X36
JTRtkQbTGeEX+/RLkow+hzcw9+mjQ4cOHbredZWVlcfZ55Lw+5sQBEEQPcw+MDsh2w2Px/Pe
Qw895P/444/9586dQxAEQRANzD4wO8HshbAdzJ6cOHHCf+rUKf9bb72FIAiCIBqYfWB2Qv4d
H/Y8wuzKwYMHEQRBEMQQZif0vz19/vx5/6FDhxAEQRDEEGYn0HYgCIIgaDsQBEGQvrAdhw8f
RhAEQRBD0HYgCIIg0bAdFy5c8B85cgRBEARBDGF2Am0HgiAIgrYDQRAE6QvbcfToUQRBEAQx
BG0HgiAIEg3b8dVXX/nfe+89BEEQBDGE2Qm0HQiCIAjaDgRBEKQvbMexY8cQBEEQxBC0HQiC
IAjaDgRBEKSvbMfx48cRBEEQxBC0HQiCIEg0bMfFixf9n3/+OYIgCIIYwuwE2g4EQRAEbQeC
IAjSF7bj1KlTCIIgCGII2g4EQRAEbQeCIAjSV7bj9OnTCIIgCGII2g4EQRAkGrbj0qVL/jNn
ziAIgiCIIcxOoO1AEARB0HYgCIIgfWE72traEARBEMQQtB0IgiBItGzHl19+iSAIgiCGoO1A
EARB0HYgCIIgfWE7vvnmG//Zs2cRBEEQxBBmJ2Tb0djY6P/ss8/4ZwaxfhAEQRA9zD4wO8Hs
hbAda9dWvr9r1y7/yZMnuV1BEARBEBlmH5idYPaCSG716tWvNTU18ecRBEEQBJFh9oHZCYIO
HTp06NB10y2iFFOyKVaKi6IAg6V44+iJqQbhCZRRFAucV+D48ssvk/H0GAfXRkJ6Jrg+A8IP
wA0irp0Q3yTpvrHg91OXTo8OShKcY7cOBT9zy9h7f0W97wKNL5fzAGRsNiljl5DltJzLiZvU
kHru85A64iWVEdTb/KtWNt24ebKZ+SvzVzbN5Sm4STW/+rjyrOtxZfuoXWZWo8zPZD1Jj3Gu
XebJLMq1cfz8U9RbNjrLzK5PUaDu2R+fCouvtgp3pqO/msDy/JJds/BrtG5opZ2/Z2XT9RtI
eoljtlWR2pCxPU2kEcfjMf82eu7o9ketq6kcXLZFceSNJd9vKjgzU2mndcfKxM430PP3HZzU
yO6puI1Xf+Aot6+oe6tB3e9UsO4vV92z+hb9Yo3ULxIl/yKpL7P4KVK7yf4FlGRIq3RpSYmN
3nw99bdSnBAvFfqyU+p3BNJnlMBY4oNxhbmt5IvA9UlSXCUwWhg7pkZF7V9bitq/oBDqv2Nk
Ufvsq4va3TOL2p9+pqj9GYWejylqt5Ix7eVmFu9OGu8i00UYy5j8s02RyX+K3aMEB7M/kG0h
5Hd0kDlHJ39mso28u3EmOdZ8BclMspFpQ+zk7cYC8un2+eTdTYX0uoO8cIOLTE60kjdqssn7
d15Bjm4uJK+UTya/+80Z4vV+TbKHOum1LHJ0UwFpWT2OfPLu2+TN554lnsrz5Ler0slrFRPI
M4tHkNN//ZCcOHyQ3LzmC7Jtgo08nBtDfpIfS+6baCcvPvcpWfmDT8iLB86Szz/6gJSs/Au5
+vrDZM6i10nB/FaSWfRrkjHrl2RU3hMkOetRMmjKw7QvZMtOUZTpaWlp09kRyEpNTc1iR2Ca
7Gg4k8bPZEdgKo0/lR2BKbKj4ck0/mR2BCZMnDhxAj1OAlzpY8dmjBuvOhpWRowcOWp0WtoY
et8YGhySnJIydFhq6nCaz3BFiYsflJAwODFJdYrN7nDGKLFKwJktVkXjTJqQvj/YFa09kse/
1IA+tZI0CIt+uV1R+9lQqU/KNmykztbKNq2Uso3yLKR1CWRi9211PzK35tjzc8W1GMrijn2I
uzKum010lNxE+8VcspRcR1bQox36AjvaoCwOOOcEv6MLGSOZQ7xmEJbHslQpXbkeU6Aex/ag
Hl+hPAFpsbEtXVeP4lpyJ/XYQP1LSCO1NQ3U5mygRw8tbzmpJetpyM0tUT0NMevmhDplUw8z
HG3S0QxHG9SxTTpvgvoQ56yXuQ1kvZ4ktYc8FxP6PBzOtbW18XpldTWO2VBKBk1vjq5e5Xpc
DGUT8XfQiEVwfiK0t5hLer1ek36eIfJm10p17STaqKu8mR7p8zZKl8k4J8IyzYH0Rbrjg20U
cl4r4pgN6pjZEFmeIpBneZjyFEE5S0PUsZiSy3UcjsxCTn16bSNGhGwzdq27bcaeE76rK0tP
5PQblDtQ5/SaXOfLI6zz5SBvJHLKfVkaA03yeVlPwvGz/F+AZzQm7E6Y38hlENeSQFYLxC8C
PV4Oc6mldMxbT2eYbLbuouNbJf1bSce79XS8q6Z4YLxjdiQWjnZIzwJ+M/jNUjyzhLgnVF10
1TdKoZ2qwmynUtAnby/1jcs5nunL0lt9oyrCOq8Ceb39oG/EKaqur6B8RvEY9I0VYEvlvlEK
ZeBlCdE3jGcELnpGjRXsO5vC7jf2EPHkviOf16dl1O960t+80PZbwmx7L+ho8wDob/qy9FZ/
2xJhnW8BeZv7QX+rhv6zDtYabjfob+tg3in3Ny+UgZXlRm6vqmk/qqI9aOs4p4H+d1efm6Fu
d4dZt82gA3sGgD7ry9Jb+rw7wjrfDfJ2R85Q7b4HZNgXpgx7oK72D4B215elt9p9X4R1vg/k
3d8PxrH3YVz6MeVFys8NxrEfQ57yOLYHysDKcgflBjonYPOEOvrPQ30N9G8FnRss4DOGKj5T
mMhnDYvpPHxeYJ5gNEcwsvkOg7HRAnUqxxdrPd0dN/dDWx4Isy33g861DID+oy9Lb/WfAxHW
+QGQtyWK42YLyPBqmDK0QF0dGgDtri9Lb7R7pHKyOj8I8h7qB+NmK4yDL1EeIx31Rlwbohs3
W6AMrCwN/HnMRZqoz0Vuo6NjFj2u4c9aBfx94nwynf/N+LMYH53SWGk1GDv1z1NO6Z6uxka5
3mT/IFhHFu+Wknk6TAOuq6vw1rjrNrlqazzTmtybXHOXXrdirqu20rW83J1T5SUxZBQt7DJa
a4stwQZnLeqXXqz6dS9ZL5dTYOIunOjwwu1LIeT3ibRR5i9ZwGKPu9tEks3qorXmJTA9MYKW
p5je36bP5ISF+J40BxY/xctL8SJisLRQzRrrO/zMEMIqRSGXKKw2XuANIxbXZccU6gqemgKp
ziaZ8MLECUd/F+67fGnXyhcERP0vk/yrJP9NUt47JP9ebi7E0v4KXXfWu2W6NPTXV4V4RSHc
TV1c39HF9TlQjwpfHhH1Jc6YpIUJ8aLCLrVZEd8WYgL4m1RLciAfC39dwe7h2m8Um3YZRROb
vZpZ0ljd4N1Q7XGV167f4K7z1tfW1Es3B5xDDbObTfxmnqRxRHO4ES3hRrSGG9EWbkR7uBEd
4UZ0doy4gMyjkpto39ocjzuj0KEbKM4fZXezbr+f2MnDt0SR88p5xcJNM5v05X195ur+ehSD
4s3apxDNTkYivUkXziz5zysqFsl4/X0gtX8O7NZgbipg4SsajdKwzI7tMPdeEO3mX/1bR8of
Psnl+7Ha/WRoMGtFl3WJ6zZ3daMnelkvHb7gUPk1V85Rs1akrE1S1sPYxJJNgRtqG9zVGuPe
UzdOlHpYMGuzUdb13rU13kpvubumIaoC0FJLWVukrNn+lqYG1231Wa416zcUuJbPn758Pulh
1ql3JT4yMu3kS1DqtGDWVuOsF9U1FFxV55m/rDS3pMFTUzm9knQz65s+Svmv9K9yWqHUUta2
cLO+ktbDutrIs14z8bYfzlo0CLI2SVnbw816We6Mq/OmT4046z/9+o4Hdl37cZGatVnK2qHL
OtjIoSo+QrfihhtOZxeICrdIWTsjzTrSih/16q0//dVVDsjaKmUdE2nWkVZ8w6hXd63I/woq
3CZlHavLumNePSz9x4U78hq/lwlDil3KOq67WYdb+tGv3rritkfEGO6Qso7vMmu1eN0W4F+e
eursF08nQtZOKetBUtYjDEezHmb99os3/WP9c4ehrcmIYNYJxlkbdKpuZp37788eqT+aBqVW
pKwHh5s1qFXEWT/81fLD7cO/hlKbpKwTw81aZBJp1sUXv37z3x59U4xmUtZJuqy7Hs0izPqa
Xzxj+ThrJFS4Rcp6SKRZQ8WHnbXvfxfe//bDZ6HUVinr5EizFpmFm/X8rNPbd978gRjNpKxT
dFlHOpp1mfW+if/4/KQXU8RoJmU9tLtZi/J2lfUj04bszVkwQoxmUtbDusy6h0PKk9P2/SVl
zf+DCndKWadKWadfjtGMzPjZ3qlnPhWjWXow6+HGWUdvNHssZbB/8n+6xDxcynpEuFl3dzT7
058/bLjqry+J0UzKemS4WXd3NPu/3/23n5X/z/8Ro5mU9Shd1lEfzciqx0piKsuhwi1S1qMj
zTrS0ezj9YcTS8f+SYxmUtZpkWYd6WiWuvGGTx+PF5Nhm5T1GF3WUR/NEtvrXz53/jWocLuU
tau7WYc7mp377//6vSmzAbJ2SFmnd5l1D4eUvS9da7+t9HdiNJOyHitlzTralXW1TTXTFtTW
1W9qqPK4FpCeZl0/ZsPdl5rjxfP1yGDWGZ1nXdLjrO95IPPFRXu2QakVKetx+qzddQ3VnoYG
Wt7oZP2HxJR1ixbnQalNUtbjQ2VdEqWs72xrWnnUt0CMZlLWE3RZL3PV39rorvOQaGV96K5/
2Xr/adGvLVLWE6Ws2cg23lVSV7vGvcZb7W3YxNZVahqrq10LSQ8ef3y/v3L9z6FzkdHBrCd1
lbW7usFTV+Nu8N7moRJEnvW+lXX/4/ffKB4BpKwn67JeRjOpZVluCEjg9dST7metXUEySVlP
0WU9z1tZ6anz1JR7XN4a19xrrionPcs6e4b38dbProRSm0c/yd/9WXTvnEXWRsul4d1hivgO
c8R3oFQoFUqFUqFUKBVKhVKhVCjV34pUHxU7fOobUHXjKX04usVT3kCfEiprXTmuam99A3ti
Ka+tqW9w1zTUw8bTk2YV4X6uezyQs4jaM8a3ZB9NLMmGNomBd35if/M1Etcj/RYCWwKuMWhd
B6wpsJ7q+ie7pqM1chTDc/pdQksDCzbqHqgdfAVS3Cn2UMXpcv+U518FcqohryZ0iya0ThOq
1oTWa0I1mlCtJrRBE7pVE6rThOo1oQZNqFETuk0TatKENmpCmzSh2zWhzZrQHZrQFk2oWRO6
UxPyaUJ3aUI/1ITu1oTu0YTu1YS2akI/0oS2aUL3aUL3a0IPaELbNaEHNaEdmtBDmtBOTWiX
JrRbE9qjCf2dJvRjTeh/aUIPa0KPaEJ/rwn9RBP6B03op5rQo5rQY5rQP2pCezWhf9KEfqYJ
Pa4J/VwTekIT+mdNaJ8mtF8TelITekoT+hdN6Bea0C81oac1oWc0oWc1of+tCf1KE/pXTejf
NKHnNKHnNaFfa0IvaEIvakL/rgn9RhM6oAm1aEK/1YRe0oRaNaHfaUL/oQm9rAm9ogn9XhP6
gyb0qib0mib0n5rQf2lCr2tCf9SE3tCE3tSE3tKE/qQJHdSEDmlCb2tChzWhdzShI5rQu5rQ
UU3oz5rQe5rQMU3ofU3ouCb0F03oA03oQ03oI03ohCb0V03oY03ovzWhTzShTzWhk5rQ/9GE
PtOEPteETmlCpzWhLzShM5pQmyb0pSZ0VhM6pwmd14QuaEJfaUL/VxP6f5rQ15rQRU3okib0
jSb0P5pQuybkh1Ac388Q2FwDsJlH8Z1s05i4eh3MWtjZa+Fcgm82zGPE7Ibdx+ZNHhL82IiF
BL97baluNuPkWxCvgmcLMlj6TNZDPGvxqRuRyZUwAdsJTz27A1uon+cfBpQ/05UA9yRIu99G
keAXm0wkwQ/zZZHgl5l9B/JIKFYLeF0XBXR0WkAm0Qq+W7rr0sWABEalG6x7NozhEt4HMYNb
yR3wPOegeTNJQ35ckMgPimEURV89A23O3/GpLYYEP6E6XorZCHOFJ/FJqV8xDjr09WE8tVmk
8y2Kg1SanIbn9E9t8pOdVfPUppDg54VjpFfepg6jrJC34yi7QoyydcH71avs7DLpagm8240P
7EdbJa7eqmpo8CrT4Zuke5/QXLXAs4O4+iRcVQe/FZLcTF6HNPiJj8nGSHWjaAY/M9+u1cnI
J99iCox8SmDsXdaj7GM1m5fCFCMmIIYpIMaqHokxxHBLT5jiJAXEMQfEualH4gzvZIdRmEKl
GtTRDqkZwxHKpBHKeBOnWCIMT6rhGgUKbRrZrIP1rq4+Y/8d9VPHxguecgN0VbyBPvCGXvB8
QlG5WYq9GU3Vt9p0ym4iX+hSOj0nTGeZFCdoOtnZuxTtNFO7ABqe6VwjPaCI+4OmszzkVaa4
FSGvmknwCx87XmUDS6XBVXVAlMsrPm1VCYu3JqiYOF3djAacav0NJmsUcVqB22lkzbI0O38z
fwYvuUaBUbDVVryQ+a9i55XB/DzrdoXKNu7/s8LWdLdey/zsae5Zu6tDmmxVcpLlkWtEvj5n
2TUizbKYYJobrWqae9gfc8W1+nTYKvPOhA08DntWdlkc14p09iYF03nEGUxnsLVjOqzZ/zQs
m8dhqyvFcSe5n60WTYo/yv0FLHLhhwv197LvA9wwqpjHYWsOi+2Ey8DWsh5J+NM1iSSRtkg8
pdS9ptrjmlvjrt50u6dCNQj1jevXMzPhWuBywUdfg57Axbl1HldFYJddvcu9vrZmrWu9x11T
76KPtw3e+gZvubu6epP8GdIi16QS12xXdlZ2wWSXS2zI1O2EbfDUN7DMJ81bUJPpmregYnJn
ciwPpk7zEhI1MBlqKtx1Fa4Kz21ethGxpl7OXexDnVgP+UknAuK7JpXX1tV5yhs8l0UGtbob
eBO4Sus87ob17K5JazwNTR5Pjau8trpxfU09qylPvbei0V3tmtTkbajyypdK2YeD57kb3EFx
ljauX+Op458cFonWs6KIW4LXeTnoNf4J48nvoFqgWnRUi+AMtEya38bDFCi4eLMRRm71E5Ds
bzwZSe9L4/PPRFJIx8DN8HU599KnhEdojH+m156h11rJLH7+a5JAHMpYMkVxkjwlkcxT1PNb
lFiyTRlNJ1cjSauiGuVXlTjytuIi55QR5Hn+VUiy6RSfwhwEy2Fm+GiN+HqeNDBRVjDhibCc
VghjtR3GafF1SOxt1xAIPwLpxsJ7E/G7Kc9AOvGwxj8LluO+hiNb1HLA7zWweOz3dZzw0JOn
qOdYHvMU9d4UXnI1H/bps22KWsPDYKo5Ep5NWhVV3hG8VlRZ2LW3FfVzHmwZ8JyiXhfPL2uk
976yuS4nwc9pR2ius3ik1oWhNgooUNWtZC8317PVVz3cTPG5kcm3MGDSrapJZ2kWmztP82Y+
5VCnAyz+Xmsrv5dVm2+472qRJokv7lK2D217A/n67K0BeXyDiwP+4sTiDiY3SX14XSjKUuz0
Bfytkr84xtepDExmMlWVmaXZmkIWJpIfUN/3AqubOYVZs7L5YJGdncN+JOZ7nvrsrBkF+dl5
WTMKZ7om5We68rMn0+s5udnsYs6srLxsHn2mGnv58tycwpycnIL8vLw8emPBO5c/C+Nh5Hsk
9DASfAi20W4aS1VyCO26w2gaI6RrLtrdptFwHq2/fGkjzkx6z2x6/kp6bj6cX0hzuZamsZSy
TPpykxX03pX02vP8FUay1CbyT5JYYeiIhe5hhe5qgevDSPCrRUfAuRho93i4bxqcZ10rD9qc
XcuHewdzydW0E6GP2EAXroQ4LM/54E/hpQp+QPVakGcYLGmLn+FZRoI/OSeW3diwsBLuFcNC
eYhhoaKTYWE4EBgWchVx+m/ZBYYFQgLDEVGkrg3nmb9YYd1cfOfivAX5+dn5+e/oTxh3IXuH
LlR1WWvfxL/FyEz/WnmXySfBX00jRPtZaUXqFuLTxFadylWEUDlPJyqXCgRUboIiTqPKBVWO
WbRisLbculF/Ih9jWIUuWU6H5az83MKsQmoAjM4aK1xcB4WruKx1b+KqZqc8z1dmzCGUzQrK
Zge/UDBPCAWr7ETBhgEBBRuhiNN/6wp2I/cVB1Yyysi2axL5ZlpmtuUHtAVinuD6rovPKN4J
L5qx2o3uoHZll7VF4ui/RKpy4lPxKdKSnfjm20RJzSpDqNlaVLPuqBlf3CIfLhSLdhuIi6pZ
ClQ6PGzDQzOdpL4T+pKxOiX2sjrZ6b8YA3USP85hD2OXQwxVlBnhvMox/ErYLt7sRKmE317t
Ujp5s8O+1nwH/PTrjbA8+0N8kzKg3uxsNHizs9HgzY5bl6b6ZoedvSUKb3bWdvpmp6rTNzve
Tt/s3NLpm511Ia+yuVR1yKs2eOlhfJXVck3Id0Zu3TujGDCZtxq8MxJx0wKLd2AyaxRxWoFO
SQf1wLsP+nB8bWAqbNvbYeGG7VF+QWk1fB+00fRI4J3LYLP6zoXtsDyvWK4V73c2mtT3O2yN
j5jjuJ99Hfx287hrxW9oZ1smcf/36Z+jlnncz5bOfmpdyP3se/wrbGXXdjXrGjy62FDOk4OC
cvoSgnJmOoJyPusIylnoDMr5ijMoZ1VMUM7BsUE5D8cG5fxpXNm1iaSc6tPNlOCacaV7vbfa
66kPnpFMj2sDPcVjbJpbvaHKfUNNYAXdtcBbX+Wpm1jvWrx8nsvV4eulAqcMvqDG1cXXMnUS
AbZauFxdfttPGFFEbuF+c5DLFeEX/URwQydZhPN1J6XsrUeFp8Htra7H1ujr1ngHOxp2NGyN
y98awUdEt/SIeLNZ/4h4B8w02DJbEp325fLJEVuyT4XPDQwha8hIsoWkk8fIWNJKMshfyWQS
p0whM5QcslbJJX+vFAYs+EFFnSYeV4aQNmUkiTWlk0zTWLLUlEFuNU0mPzFNIa+YcsgFUy6Z
aC6kj4/ZinZtN0la9nPBtClXelkxE5bmbLC1fwhMytbAywDxycF0WLFgnzsbC1Mx9g4zA1au
2SdZJouHIvitcPbiYgb158D70LWKmjd71/n3ivouNYmXUr0vmZdUlYE9/rbBO0z2+BtrUmVg
D+CZJlUGJvdSkyoDK/OtJlUG9nLlJyZVBnb/KyZVBvZofcGkysBWiyaaVRnECs1a3QqNmG56
DVZowpxu8kV9ElzULybBd4BlxNdhuimeNY2eR12mDwPvHom5NeBvlfw+S9BfbA36ia01sMrb
aguu+JbZg37iCPr3OvZ2+h6Sp+9sXWj0jpTESOlI/uJYaaVZ8vvign5XfNDfKvnLBklyJkjp
J7AV660wsc/JYe8YC5Z43DUu9gn/rGnZWTML8mZOy5mZNWvGtLysmYUzs7Nm5OXnsDO5OfRM
dl5eTlZeYWFOflbOzJzCrBnZ+Vn5uTk8CX6X/k9h1syc/OCf3IKsWbn8T04OzeudfiSL8aD1
QxJ60GI/SWGid1igG6irNYnUl0oHiDTKOMoUSjZlBh1ErqAUU+bDQEe4DqtvX0vouRsoqyg3
UyooXkoNpZ6ykbKFr9rrBy1FQnxowEy0P0AWA4NWIgn+EJkYyBxQIhsMWuOkt61TwM96Zrb0
tnUGDIps0LoC/IPUHqu+LYC3qlboydfCvclE/fiBFQatG8A/FDbKi7cON4M/FV5pWWHQ8oJ/
BDwJW2HQqgf/KKJ+ANwKg9YW3duLqhCD1i3dG7R6suJv+KrJTIKbJMzFwTealuDbzVZLME6x
NRiH1m/A77MF4xB7cLNFqz0Y3+cgXQ5abIA0GrSKrdLgJPl90mDpkgbLVslfJg2cxCkNTpK/
WBoIP4xhgxZbTl7NdlRIG92W1n6Pztxr5QP38SEgN9jJef+emZWXO1MXDPr4n3d6JRfjgWZ1
JwNNx3cp6l8T7XJm2qVNdA5got3JTFM20a5hot3ATMZQxkpf8DIOBpoptENMp+RTZlHmUK6i
LKQsoSyjrOQDDZuZDCXB362JkwYA8cMXg6As4kf1xLuaIVIHS4E4sST4DdhxJPi90PHQcc2Q
3hjwJ5Dgd8wmSQNTMgxMYhCZLg0i+dIgMksaROZIg8hV0iCyUBpElkiDyDJpEFmpG0S8IQaR
db03iIgVd6NBpFUJzppcii84iJilQcQsxTFJcaxSHKsUxxzcdbXXLMXvYhBh4362yXiGttca
nKH5bNJMzC7NxBzSzE3y+5ytIQeLwGAkzZpccWwQuQUaarm6i7Omnm3GqqnXHlV/FGYi7/Ry
fsYDS2UEA4sd/poI+0BjPPuAFiWR+lPocRhlOPWPpqRLA0sGzHym0TvzaQf9DoX98uICymKK
GFBWU9yGA4udBH/dUQws4udRHST4CWwnCf4qRwwMOGIPWYo0sAyTBpbhEGcQdGYLpJEuDSwZ
kF4y7CmzQ3r5IBeT9TvSvrRi8LP6XgB+lo/4FPkIaQAZKQ0go2CgFwOLWzew3BJiYKnuvYFF
rPgbPsKYWgNbTX0KCWwRJdJjVKslGKfVFIxj1MFn83vVODxNi5RmTOfbVNnrnjJr9jVGsxOX
9IjUKvnLpEckIj0i7ZX8xdLj0oeS3zdYGkwSpfQT2cDCvsGGffvNNTUV3tvUXeQlLv7JfdqZ
82fOEi/Ps7NycvNnZGcV5uTmBs/lFuTSvzNyZ8wU56T4eQX5y+ezhUm25T0rl84gZsGffDrx
yJpRkJObVZCXS3052blZhXk5sm8We5Xfj4UzHrL2RDBkJcFfG03JQc2TjUygZFJ/cChiNspB
Hzts0hZVdamBDUeVlHWUDZRGyu2UOyn3UO6j7DAcspKkraQ26YHKAbikB6oJ0gNVJlyPlYaX
OGl4iYfhxQFD1kLwJ8CDk8hzBaSRLA0jKTBciLnQOmkutEGaCzVKc6HbpbnQndKQdY80ZN0n
DVk7dEPWuhBD1vreGbK+jXsJjc77pO2rRJEe5CQ/rc/g1lerukrGd+VLfmKTzkt+YpfOU38i
Vxy2S7EmJydP/TeLucJ3Ql4x7qyDI+is3d+zKHYush/9tFEclBjC9pgoVL0U2m0U2l0U2k0U
2lm3QUmTpPuTpdWRFBL8mcShJPjjgcNI8Cf1UknwM9nDIT0FOopQ6JHQYcX+70HgH02kb5CB
jlIdoqPUYEcJt6PIe765Ikt+YpLOS35ils5LfmKRzkt+fccKbvCtyaV9YAb9XzhjxjuGZ407
SFwvdhC2k1yhqq3QMVqhaq1QdVOoailchUSH6byDKNITu0KCVk/sPreCXywfig5ilzqIQ+og
TqmDxEgdJFbXQdaH6CC12EEMOwLxXW00SXeRVs0O9cAEVgl+FstlkuKYpDhmKY5FimOR4kjL
fS4bm/x+B9aDG7Lp1C9vxsysmTk5OVkFM2bRyWPerNwZWTNnzcjJypmRm52VPys7tyArPy9n
BrtOI+Xmv9PD+4073Yxe6HTih6ltfDd9HCWR+ofR4yhKOvVPpMdMSg6fQuo7nQKdToGOlCLt
thdbosX0LVF64hwmTd9GSdO3dIgzElpHTN8ypelbjm76VhOi023ATne5pm/8vOQn0rKcT/IT
ac3fJ/nZUm0ib3CmJPMW5Gd3/PdOF9eNO83QPpzKmWA920T1yUTLaaJdwxTlqZz4GUSxfj2C
BD/ZPJIEf3V1FAn+FuloKT/jzeRzfeq5K/latdjurHaqwYFylwR8V8G9SWQe+Gz8VRkhc4uT
fOrLuzC+fs9BtF8oRnqpEvpjBxvC303W2bbH3B4/O8HM68VC2kgu33FspQ0TZ1FfmFTQKrdA
OR7jD+Bi2iJ2Fqs9T1/SmmISeKPKVFNMcBy8xtWXCysgFfYFaMsk/yrJf5PkF1+cxvx7+dcC
i89dySm1w9dh+SW3rIvrq3TX9e6mLu6XJTO6viuwk1kh2t+7VyeP4mouWOLvwAuYEq6Ts0Nq
QVuRekwuDoYdfFE6HqaTo6guBlL48PZkB8ScV6xN6Rop/CzvNYN4CmlkDJ0hGcnwPW0KrWs6
pJDAU0in2pRBnghsD+rMRTPWL31xJJxfeOjM7Q8rp/DSjYkoXRb7l8XaMihh56VElFf46cZG
lG6sQRlMYedliiiv8NONiyjdOF0ZlAGgS8oA0CVlAOiSaQDokmkA6JLpW6tL4323wyxUOxsY
Vv27odW/qyxis2OHPVhqtf6zA2urwXuCR5OUr1XOMjALIoFZThMv1TT+/KzqUZWygs+C1HCV
UqUsk8J/MlUpq6RwoaVKuUkK77VWKTt4+F7N96AIx0q2FeT7ERy38WMxGQ+1MSr0PIXXxqpO
amNcccf2M3XQ3M5rgzlj6ZkkXUk/+lstvf7R95riG7h7oig4KwxfeqWj3N2WnkliLD0JSD+m
0xnus5ZV3ZL+8tZ9UHrXt1r6dGL8NNEahuZcE1Lvo6A5XJKupB8b1brvnV4blD7jWyp9qk98
Pl7YzrGBnxIQc5UMvuoR02EOkx5cakoIXnH50vj1X1m/cT4Wv3TIEasr5vb4KUPUlZK5CezH
SY4F1jJYWdR0BhMoFrfuyWRjp99Hcw+UwHheIHIzutNVrEroJPfbXor/D3tZwtO2v8Y/Zp+d
8L9sr8c/by9NUGjraCWc5NvJVxYU/j1j0hyGffzWeDYi1gla//jHzGIHX3oMNKLBDMZJ8xtM
a2YjqaCJViks/WJHsLZjpPuFmxw491P+00wJctombV7qy7Qu19IsHULJnUzKzAZ3W6RlGycJ
fs24/mslJhVnB3LLCfh60uikk8lhsNHP2v8UP8VZljDUcT7e5pyd0G5/Pz7NGbrRZ9Dwsg6N
vrrdUMC9G76byhq9rLJyKm09WyeNrtZPbzS6LXqNbvuWNvoq542xu2PKEpqdd8TWxMxOqHRW
xG6NCd3o36HhVR0a/fw3hgLSxp4UWBF0kPh+0dPjo9fo8d/SRv+PmL3xF2PLEj6JeSX+SOzs
hDdjfhH/RWzoRp9Dwzd1aPTtlwwFLM7LS4KePr3Ywfc/9H1PT4teo6d9Sxt9Sty++DXxZQlL
416PnxM/O2FG3L/Gr4hnjZ5j2OglNLyjQ6OPu2g8vF/9URzY9CzaepZ+0dMt0Wt0S5iNbu9X
jW4iVfZS5z1xJTHb7RudZXGZMT+373QujEum4uWatY0+luh/n1aafAZySZakn87l2+ZXS7aN
xrqVp5gP16f6kvjkWVEtbatII5MbS/Vt6jTYciEm9eqrT3XTSxy0bAWNv47+nVocVn25jOuL
pcnK3nl9zXB+k/R8zCdDVjldQ3bH/MeQOmfhkNtjnhoSvfr6yqzW11dm9lVAHesrPkR93Vjq
baj26Osr7rLWFyt75/V1ynJj7EXrLYMGW++IPWJdMGiS9e9if2vNos2YrfSkvu4xi/paDPp1
Ywj9GsT32CWoW6ShvtjQMB6+Ls5V7qmurndN428/zdCJ5Yqz8cwU2Daurv47iPj0zeWoVjXH
zqr1t4Pi4p5OOBB/YlB23P0Jj8RfHLQwri7BF99TNdweI6r134larexnM4yqNYGroV2jhqxG
vpcDejiCC2FUnSyT7labpdNq296pNjrIUltqAnuwrrPNTlAfrNmRPVjr5zXqg7v2N+FYaAps
vBgb2JAhrEtPH7qZJJ1Lz5YF/sFWlsCWBZpofPagzo6mCKVPi7L0QhJj6VOLfXyXzDblLvV7
/6+sdpevc7lrKlwrq7wNHmqtLSDeD4nLpt3Z0WERJ4w3VPJayN69Pyc+n48cPnyYlJWV8TA7
njx5kvu/TXEGosP2QYcOXSTulE98vOE0+4x84AmUzU/8WD3o0EXkTpPBFu3uMv8AtM4YB+Ng
nPDjBG2rSbKtWFMYB+N0pxeZsRdhHIzTw15kwec8dOi6+ZwnepEVexE6dD3sRTbsRejQ9bAX
2bEXoUPXLXeq2Fd8d2D7WPBLTh4PfHGXuqL/88DXeAe3hKgfQHFqrorvHhFXWTipuBC+MMWp
fqllXe0tnvIGl7emstaVY/BlJ2LrRbh7ES+/W6jwr8HUu14SSN0uJbIKfoxkavF6vldP/LyD
6uac/+f0I0oNr//5Gzd46rzrPTUNrnnuBg+pVX/WIX96dsH03OzcbFLDt0NK0a6ZRyPxNq/h
O3yW1jZ41tTWrtNccARbMXgyXpOQpy54xalGb6gtr60OnuUHCN3Pv+kdXh6xD8wVvfHHP84x
qougihYWm33FRPs1Jd1xSvH/BwAA//8DAH6cjOA=</Template></GraphPadPrismFile>
