# Supplementary material for: Regulation of stem/progenitor cell maintenance by BMP5 in prostate homeostasis and cancer initiation
Source: eLife. 2020 Sep 7;9:e54542. doi: 10.7554/eLife.54542 (PMC7525654; doi:10.7554/eLife.54542)
Supplement: Figure 1—source data 2. [file elife-54542-fig1-data2.xlsx]

## Sheet: Fig1C
Analysis Name: Control
Iterations: 5
Proportion: 0.0001163 Frequency: 1 in 8,600
Proportion - 1 S.E.: 0.0000892 Frequency - 1 S.E.: 1 in 11,211
Proportion + 1 S.E.: 0.0001516 Frequency + 1 S.E.: 1 in 6,597
95% Confidence Interval
Lower Proportion: 0.0000692 Lower Frequency: 1 in 14,461
Upper Proportion: 0.0001955 Upper Frequency: 1 in 5,114
Log Proportion: -9.05950 S.E. of Log Prop.: 0.2652
Test for internal inconsistency in the assay
Chi-square (Pearson): 7.741 p-value: 0.3560
Chi-square (Deviance): 11.984 p-value: 0.1011
Degrees of Freedom: 7
END
Row		Dose		Responses	Tested
1		125000		2	2
2		25000		5	5
3		10000		4	4
4		7500		2	2
5		6000		1	5
6		5000		4	9
7		2500		0	4
8		1000		0	11
Analysis Name: PbCre Gata3f/f
Iterations: 5
Proportion: 0.0002537 Frequency: 1 in 3,942
Proportion - 1 S.E.: 0.0001975 Frequency - 1 S.E.: 1 in 5,063
Proportion + 1 S.E.: 0.0003258 Frequency + 1 S.E.: 1 in 3,070
95% Confidence Interval
Lower Proportion: 0.0001554 Lower Frequency: 1 in 6,437
Upper Proportion: 0.0004142 Upper Frequency: 1 in 2,414
Log Proportion: -8.27952 S.E. of Log Prop.: 0.2501
Test for internal inconsistency in the assay
Chi-square (Pearson): 5.687 p-value: 0.5767
Chi-square (Deviance): 7.285 p-value: 0.3998
Degrees of Freedom: 7
END
Row		Dose		Responses	Tested
1		25000		6	6
2		10000		2	2
3		7500		5	5
4		6250		2	4
5		5000		5	6
6		2500		3	5				Analysis Name	Log Prop.	S.E. of Log Prop.	Difference in Log Prop.'s	Ratio of Prop.'s	95% C.I. for Ratio of Prop.'s	Ratio of Prop.'s=1
7		1250		0	4				PbCre Gata3f/f	-8.27952	0.2501
8		1000		1	7				Control	-9.0595	0.2652	0.77998	2.18143	1.06770 to 4.45691	0.0162
Analysis Name: Krt5CreERT2Gataf/f
Iterations: 5
Proportion: 0.0002537 Frequency: 1 in 3,942
Proportion - 1 S.E.: 0.0001975 Frequency - 1 S.E.: 1 in 5,063
Proportion + 1 S.E.: 0.0003258 Frequency + 1 S.E.: 1 in 3,070
95% Confidence Interval
Lower Proportion: 0.0001554 Lower Frequency: 1 in 6,437
Upper Proportion: 0.0004142 Upper Frequency: 1 in 2,414
Log Proportion: -8.27952 S.E. of Log Prop.: 0.2501
Test for internal inconsistency in the assay
Chi-square (Pearson): 5.687 p-value: 0.5767
Chi-square (Deviance): 7.285 p-value: 0.3998
Degrees of Freedom: 7									Analysis Name	Log Prop.	S.E. of Log Prop.	Difference in Log Prop.'s	Ratio of Prop.'s	95% C.I. for Ratio of Prop.'s	Ratio of Prop.'s=1
									K5CreERT2 Gata3f/f	-7.53875	0.3624	1.52075	4.57566	1.89756 to 11.03342	0.0004
END									Control	-9.0595	0.2652
Row		Dose		Responses	Tested		Comments
1		25000		6		6
2		10000		2		2
3		7500		5		5
4		6250		2		4
5		5000		5		6
6		2500		3		5			Analysis Name	Log Prop.	S.E. of Log Prop.	Difference in Log Prop.'s	Ratio of Prop.'s	95% C.I. for Ratio of Prop.'s	Ratio of Prop.'s=1
7		1250		0		4			K5CreERT2 Gata3f/f	-7.53875	0.3624	-0.74077	0.47675	0.20113 to 1.13005	0.0463
8		1000		1		7			PbCre Gata3f/f	-8.27952	0.2501
