# Supplementary material for: Regulation of stem/progenitor cell maintenance by BMP5 in prostate homeostasis and cancer initiation
Source: eLife. 2020 Sep 7;9:e54542. doi: 10.7554/eLife.54542 (PMC7525654; doi:10.7554/eLife.54542)
Supplement: Figure 2—figure supplement 1—source data 1. [file elife-54542-fig2-figsupp1-data1.xlsx]

## Sheet: Fig2S1A
Ensembl_id	gene_symbol	Wild type_Passage0	Wild type_Passage2	Wild type_Passage3	Wild type_Passage4	PbCreGata3f/f_Passage0	PbCreGata3f/f_Passage2	PbCreGata3f/f_Passage3	PbCreGata3f/f_Passage4
ENSMUST00000106804	1700024P16Rik	350.125	251.27	102.988	116.347	315.392	716.388	465.011	910.503
ENSMUST00000101295	9930111J21Rik2	655.635	1257.26	3269.98	3471.82	625.059	1774.65	1558.41	1209.32
ENSMUST00000114294	ABCG2	742.31	1087.8	1467.73	2346.18	731.552	743.681	492.501	319.527
ENSMUST00000124933	ACTG2	5.03091	5.03091	5.03091	5.03091	6.83984	55.4785	68.7206	199.577
ENSMUST00000188497	ACTR3	25.161	25.161	25.161	25.1612	25.161	25.161	394.584	196.588
ENSMUST00000001920	AIF1L	281.138	820.765	960.306	1672.37	166.096	469.48	172.745	182.995
ENSMUST00000032175	ALDH1L1	201.677	511.321	305.609	286.367	139.891	940.275	668.522	722.426
ENSMUST00000125271	AMOT	230.3	1245.48	4038.03	5014.62	306.656	870.402	969.04	644.939
ENSMUST00000022921	ANGPT1	14.1966	7.77473	11.4444	9.60956	13.2792	77.4981	49.0583	161.9
ENSMUST00000022875	ANK	1877.4	2550.79	2713.83	2743.61	2413.29	1358.53	349.146	441.295
ENSMUST00000096554	APCDD1	607.552	689.789	410.528	516.749	581.853	533.882	160.392	112.421
ENSMUST00000175849	Apobec3	54292.8	51803.8	50806.4	50500.6	58065.4	62969.9	65823.2	68099.6
ENSMUST00000093976	ARSJ	51.872	35.928	14.1861	17.085	72.1645	69.2656	76.5129	170.728
ENSMUST00000129411	ATN1	119.281	45.143	571.287	242.483	45.143	45.143	45.1435	45.1545
ENSMUST00000026120	BHLHE22	73.1213	188.546	150.071	160.394	77.8134	440.04	531.066	602.385
ENSMUST00000012281	BMP5	105.162	43.3229	22.6186	22.6531	133.784	141.048	241.512	457.478
ENSMUST00000009143	BMP7	1909.46	578.901	348.351	529.754	2427.4	1020.79	838.817	1111.88
ENSMUST00000040971	CAPN5	595.7	1949.72	3246.99	2916.74	505.012	1627.69	1161.1	1233.76
ENSMUST00000005488	CASP14	105.197	99.3995	146.936	272.152	84.3271	36.7911	50.7041	46.0664
ENSMUST00000016638	CD34	44.2739	217.511	126.484	266.368	21.9175	497.709	580.919	659.38
ENSMUST00000110815	CD34	19.339	210.203	67.1174	78.0436	46.4334	349.4	402.39	385.021
ENSMUST00000115816	CELF4	3.78804	126.613	120.216	96.2861	63.7808	80.3178	3.78804	3.78804
ENSMUST00000036267	CHST2	224.077	542.494	138.895	202.069	251.279	700.341	499.292	561.695
ENSMUST00000029929	Clca3a2	557.192	1539.77	754.049	650.549	364.451	1679.68	331.891	321.741
ENSMUST00000073942	CNBD2	82425.4	74706.5	69174.6	71776.5	93660.8	98777.1	102499	128686
ENSMUST00000028280	COL5A1	69.7284	30.2993	28.4241	21.7724	210.967	206.851	218.081	227.365
ENSMUST00000086430	COL5A2	326.325	1603.49	2256.24	2215.23	330.817	4691.81	7162.64	11794.9
ENSMUST00000174803	CP	169.428	505.058	350.871	341.1	97.4568	1324.55	955.183	720.657
ENSMUST00000097816	CROCC	18.3238	18.767	190.315	262.741	18.6126	18.5213	18.4595	18.8983
ENSMUST00000035661	CSPG4	1010.19	634.255	540.722	546.118	1033.57	1037.17	618.067	747.574
ENSMUST00000073350	CTSE	2.6176	2.6176	67.2152	70.8545	3.52743	12.6257	2.6176	2.6176
ENSMUST00000031322	Cxcl15	64.2337	453.184	346.441	652.109	35.4406	256.973	77.914	49.8705
ENSMUST00000035625	CYP7B1	553.088	507.989	305.044	257.126	577.047	1219.71	989.984	1204.2
ENSMUST00000020249	DRAM1	998.924	1088.18	727.922	762	882.085	2197.68	1402.99	1529.57
ENSMUST00000025025	DUSP1	2283.33	2722.97	6123.49	9274.31	2897.37	2139.15	2991.1	2483.09
ENSMUST00000021796	EDN1	3076.57	16008.1	14315.5	19078.7	2199.4	23352	29653.5	27822.5
ENSMUST00000051014	EXPH5	27.7516	28.7179	42.2458	33.5493	41.2796	67.3691	150.469	170.761
ENSMUST00000059193	F2R	205.51	704.169	693.982	1184.09	198.216	357.812	155.698	175.579
ENSMUST00000020938	FAM20A	12.3969	64.5853	70.2093	52.929	8.64216	98.7934	188.155	274.753
ENSMUST00000022317	FAM213A	1288.92	2588.38	3782.42	3609.32	1222.94	1911.49	1486.63	1370.24
ENSMUST00000118466	FAM213A	948.431	1413.11	1966.48	2197	848.015	1086.33	736.773	488.013
ENSMUST00000079413	FKBP5	6430.95	1441.76	1394.93	1557.56	8560.35	2472.07	2576.84	3169.5
ENSMUST00000186129	FN1	3673.65	10916.3	49956.8	51578.8	2300.47	28130.8	22797.2	20032.7
ENSMUST00000022287	FST	470.436	774.374	404.746	341.017	1069.49	868.497	1830.31	1645.01
ENSMUST00000024858	GALNT14	28.0073	167.647	204.438	376.405	27.8032	148.62	43.8329	67.1395
ENSMUST00000131475	GGCT	1062.63	449.843	643.576	670.345	765.792	247.904	164.499	181.616
ENSMUST00000078223	GIMAP8	15.3232	46.2669	38.986	35.3456	16.2333	202.805	96.3228	160.03
ENSMUST00000068581	GJA1	11886.6	6238.37	7123.04	9878.24	13910.7	9468.19	11755.8	15817.9
ENSMUST00000055698	GJB2	4824.15	2112.43	2552.12	3080.12	4327.43	1678.26	1251.45	1490.61
ENSMUST00000074805	GLIPR1	141.504	1852.93	2637.43	4108.5	118.872	986.483	1101.35	1409.62
ENSMUST00000024823	GLO1	3328.08	2415.29	2745.05	3989.05	5425.19	3824.03	6222.24	7514.45
ENSMUST00000060833	GPA33	243.157	844.445	1985.59	2363.72	264.163	456.614	446.789	339.886
ENSMUST00000188404	Gsdmc2	77.8129	43.2549	134.97	323.855	20.8924	51.3489	20.8924	24.0322
ENSMUST00000131558	H60b	10.291	0.393689	1.63086	1.63086	42.0207	123.082	115.156	58.5406
ENSMUST00000179928	HCFC1R1	348.355	18.3876	33.9989	61.4939	1637.32	990.453	2395.89	2754.16
ENSMUST00000105046	Hmga1-rs1	399.942	358.07	369.613	358.039	7642.65	2360.79	3162.49	2904.83
ENSMUST00000113203	HNRNPH2	185.04	43.3219	179.708	106.229	241.502	55.9272	10.5528	10.5528
ENSMUST00000053116	HS3ST1	324.546	583.881	585.735	692.953	146.099	462.72	205.527	123.816
ENSMUST00000085065	IFI27	378.814	267.328	228.543	221.648	1145.48	433.823	551.384	633.441
ENSMUST00000026565	IFITM3	4556.18	27501.2	18501.5	19585.6	11013.3	39560.6	32040.8	32625.8
ENSMUST00000053107	IVL	850.71	1900.49	4892.9	5558	804.143	994.459	999.521	581.433
ENSMUST00000057262	KCNE4	39.673	282.9	585.151	506.333	117.71	393.302	174.982	135.807
ENSMUST00000028102	KIF5C	376.997	429.616	446.456	403.551	613.937	701.443	788.949	1166.9
ENSMUST00000057632	LARP4	337.142	16.3886	16.4002	16.383	16.5242	91.4986	163.839	383.762
ENSMUST00000043722	LGALS3BP	697.539	1408.81	969.823	1057.62	2885.75	2474.65	1689.38	1735.49
ENSMUST00000108268	lgals9	-32.806	360.566	135.782	186.495	340.375	729.026	354.687	605.651
ENSMUST00000111037	LGR4	25.6645	25.7414	25.5205	25.5187	39.055	114.657	146.626	377.041
ENSMUST00000171588	LIFR	83.632	83.135	24.6561	50.7854	135.023	170.976	140.386	228.441
ENSMUST00000055922	LURAP1L	1002.2	4213.3	3441.33	4206.32	961.506	4869.01	5895.58	6769.86
ENSMUST00000065408	Ly6c1	344.737	296.127	757.961	870.621	179.617	186.424	139.104	114.671
ENSMUST00000028103	LYPD6B	133.382	77.9852	54.6602	40.082	210.646	149.418	216.478	156.707
ENSMUST00000028854	MAL	622.532	2257	6105	5789.57	659.532	1464.28	1690.9	2158.95
ENSMUST00000038361	MGAT5	1904.07	3496.9	4815.28	5048.4	1851.9	2838.97	2073.02	1937.47
ENSMUST00000052730	Mrgprb2	4.65293	40.8848	74.3994	162.262	4.65293	23.6747	6.46452	4.65293
ENSMUST00000021922	MSX2	305.996	927.888	858.028	1467.96	301.998	486.889	254.741	345.909
ENSMUST00000048898	MTMR7	-11.7744	362.041	121.619	187.793	-15.6383	611.938	345.791	468.439
ENSMUST00000125053	NCOR2	2735.91	3043.44	1176.44	2017.71	3668.61	3702.07	3464.28	3094.68
ENSMUST00000082411	ND3	2633.29	2348.48	2058.5	2454.45	11045.8	11218.3	14436.4	22810.2
ENSMUST00000175858	nptxr	1063.05	534.438	1025.7	1027.57	673.021	257.485	156.808	239.787
ENSMUST00000080322	Oas1a	152.713	182.242	62.4467	52.5971	716.33	258.027	208.135	215.136
ENSMUST00000034692	OLFM2	29.7993	456.443	351.099	403.771	21.3718	267.877	83.5248	105.647
ENSMUST00000170127	OXR1	2439.87	4556.03	5405.7	7378.51	2746.34	7589.56	8860.65	10895
ENSMUST00000058016	P2RX2	274.003	564.412	117.393	97.7301	206.186	574.61	255.081	375.282
ENSMUST00000030765	PADI2	116.601	2343.04	2402.07	3192.49	115.625	1264.12	529.396	292.108
ENSMUST00000026381	PADI4	798.757	2634.47	2757.37	3669.05	668.404	2453.24	1680.13	1548.68
ENSMUST00000049507	PCSK9	2675.42	3388.12	1754.04	2014.01	1465.78	3250.18	3994.71	2758.54
ENSMUST00000093800	PLS1	58.3149	358.883	380.128	432.281	52.5414	231.976	107.39	84.2957
ENSMUST00000034941	PLSCR4	107.205	26.7291	20.346	44.4021	122.901	70.659	114.038	168.481
ENSMUST00000035813	PPP1R9A	95.0653	194	408.056	369.385	77.1074	120.444	71.2306	60.3203
ENSMUST00000036497	PRKAR2B	429.347	345.464	338.55	498.573	587.804	1069.3	874.722	1237.36
ENSMUST00000023629	PROS1	961.054	941.641	1162.27	1728.08	1045.61	589.065	473.816	447.544
ENSMUST00000152184	PSMD1	13.9966	60.0831	289.567	340.164	21.0246	76.4799	75.923	105.128
ENSMUST00000097442	PTPN14	7836.3	4785.17	10012.5	12625	9328.95	4982.75	5558.71	3914.65
ENSMUST00000097648	RAMP1	56.9437	315.497	131.616	143.263	52.3078	453.95	303.891	557.227
ENSMUST00000050004	RNF125	63.9766	133.713	89.3355	88.2789	62.92	353.49	234.092	382.019
ENSMUST00000115371	RNPS1	4092.34	2995.42	3266.27	5158.82	2251.9	1732.59	974.164	1297.43
ENSMUST00000039630	ROR1	478.306	325.898	59.9618	55.2962	594.945	325.898	316.567	241.918
ENSMUST00000151289	SGMS1	589.113	440.083	420.694	505.102	500.893	637.819	951.592	1249.11
ENSMUST00000023616	SLC15A2	105.952	412.981	144.485	144.256	131.029	869.024	475.563	397.223
ENSMUST00000064889	SLC29A1	2303.63	1213.92	678.089	843.411	2875.48	2168.63	1883.61	2395.54
ENSMUST00000000809	slc5a5	139.483	43.8068	21.5132	14.082	203.578	59.5981	94.8963	129.266
ENSMUST00000109241	SNX18	1192.71	2151.84	3023.77	3934.07	1288.04	1401.98	1424.06	1179.92
ENSMUST00000030636	STMN1	8086.2	6726.26	5568.31	7757.78	7970.88	4281.33	2862.11	2808.33
ENSMUST00000036370	TAGAP	38.0624	17.547	1.04045	26.1878	149.781	66.1673	189.672	195.276
ENSMUST00000063683	Tagap1	1071.22	476.179	850.288	1167.59	868.713	453.27	427.388	278.688
ENSMUST00000127543	tap2	839.382	929.592	429.632	553.931	1196.16	1470.44	1154.74	1410.01
ENSMUST00000111118	TCP11L1	668.776	1011.76	1402.89	1910.37	750.152	905.34	566.606	526.496
ENSMUST00000031224	TGFBR3	2852.67	440.671	478.117	498.776	3883.06	678.256	673.091	799.63
ENSMUST00000020234	TIMP3	7904.43	8127.86	7399.91	8480.24	7832.5	12115.3	17501.7	20008.3
ENSMUST00000066166	TLL1	58.7217	128.55	129.505	96.9613	64.3148	247.818	353.918	546.699
ENSMUST00000101429	TMEM176B	4113.32	6799.54	5970.7	5973.18	3787.06	10847.6	10223.6	11774.7
ENSMUST00000164733	TMEM176B	277.56	697.341	591.509	566.127	272.418	1203.27	1124.11	1539.88
ENSMUST00000032233	TUBA8	57.5079	122.163	216.406	316.128	70.6581	121.067	66.2747	89.2875

## Sheet: Fig2S1B
Bmp5 expression levels	Wild type	PbCre GATA3 f/f	R26G3/G3
Passage 0	1	1.27217	0.558199
Passage 2	0.411964	1.34124	0.210212
Passage 3	0.215084	2.29657	nd
Passage 4	0.215412	4.35022	nd

## Sheet: Fig2S1C
Term	Overlap	P-value	Adjusted P-value	Old P-value	Old Adjusted P-value	Z-score	Combined Score	Genes
Encode and ChEA consensus: SMAD4	11/584	0.00357525	0.106066	0.000596314	0.0176906	-1.67356	9.42839	ACTR3 PTPRD KCNF1 EDN1 TENM2 SGMS1 ANGPT1 COL5A2 ROR1 LIFR CTNNBL1	ENCODE_and_ChEA_TF_up
Protein Protein interactions network: SMAD1	5/192	0.0130954	0.590345	0.00819238	0.525038	-1.74477	7.56442	COL3A1 COL5A1 STAT3 PLEKHB1 BMP7	Transcription_Factor_PPIs_up
BMP2 coexpression	7/299	0.00623068	0.225083	0.000341662	0.0123425	-1.48525	7.54251	GJA1 FST PCDH7 PCSK9 LIFR SGK1 LGR4	ARCHS4_TFs_Coexp_up
SMAD5 coexpression	6/299	0.0219821	0.540667	0.00197002	0.0484542	-1.50318	5.73843	SLC16A1 GLO1 LIFR LARP4 RND3 LGR4	ARCHS4_TFs_Coexp_up
SMAD6 coexpression	5/299	0.066899	0.888316	0.0097635	0.129731	-1.41055	3.81494	NCOR2 LIFR SGK1 LGR4 PLEC	ARCHS4_TFs_Coexp_up
SMAD4 coexpression	5/584	0.198194	0.999902	0.118288	0.999412	-1.4206	2.29925	DAB1 TCP11L1 CELF4 CD55 AMOT	ARCHS4_TFs_Coexp_down
Bmpr2 R899X/+ gene expression	10/385	3.83654e-05	0.0112849	4.01546e-07	0.000118112	-1.8081	18.3854	CASP14 TRIM7 SERPINE2 PPP2R2C MCAM PROS1 LY6A APCDD1 IVL LY6C1	Single_Gene_Downperturb_down
Bmpr1a -/- gene expression	7/321	0.00161382	0.132594	7.08684e-05	0.0056997	-1.68058	10.8047	RNF128 GPA33 F2R FN1 SOX11 BIRC6 PTPN14	Single_Gene_Downperturb_down
