# Supplementary material for: Regulation of stem/progenitor cell maintenance by BMP5 in prostate homeostasis and cancer initiation
Source: eLife. 2020 Sep 7;9:e54542. doi: 10.7554/eLife.54542 (PMC7525654; doi:10.7554/eLife.54542)
Supplement: Figure 2—figure supplement 2—source data 2. [file elife-54542-fig2-figsupp2-data2.xlsx]

## Sheet: Fig2S2C
		Bmp5 -8450	Bmp5-5992	Bmp5 +11859	Bmp5+11268	Bmp5+24561	Nkx3.1+984	Ccnd1prom	Tmprss2 igg	Muc1	Cdh1	Foxc1	Lim-2 igg	Lim-3	Lim-4	Ret-1-up	Cyp19a1	Hprt	Nkx3.1-121	Pou3f3	NpntL	Ret3	Bmp5-5992	Bmp5 +11854	cdh1	cdkn2c
	Bead 1	0.51365	0.140035	0.151129	0.2	0.280069											2.46888								0.137153	0.0517241
	Bead 1	0.282997	0.203607	0.146997	0.202902	0.3545											2.20971								0.125335	0.0477506
	Bead 2	0.204313	0.176025	0.0676323	0.150607	0.187356											0.652412								0.102511	1.64927
	Bead 2	0.414331	0.167689	0.145981	0.144471	0.173602											0.78125								0.116878	1.03477
	Streptavidin anti-Gata3bio/bio 1	11.6226	5.63282	5.00669	8.86952	8.59714											0.529924								0.670754
	Streptavidin anti-Gata3bio/bio 1	9.1823	7.43254	10.3665	8.04926	8.77778											2.57372								0.439476
	Streptavidin anti-Gata3bio/bio 2	8.33312	10.5843	9.02456	8.56739	9.15054											2.10505								0.323953
	Streptavidin anti-Gata3bio/bio 2	12.2004	11.0338	7.43254	8.56739	11.1878											1.67465								0.302259
	ratio over IgG	32.8486	32.7796	39.1346	50.8296	34.543	#DIV/0!	#DIV/0!	#DIV/0!	#DIV/0!	#DIV/0!	#DIV/0!	#DIV/0!	#DIV/0!	#DIV/0!	#DIV/0!	0.346794	#DIV/0!	#DIV/0!	#DIV/0!	#DIV/0!	#DIV/0!	#DIV/0!	#DIV/0!	5.56785	cdkn2c
	ratio over IgG	25.9517	43.253	81.0294	46.1289	35.2689	#DIV/0!	#DIV/0!	#DIV/0!	#DIV/0!	#DIV/0!	#DIV/0!	#DIV/0!	#DIV/0!	#DIV/0!	#DIV/0!	1.6843	#DIV/0!	#DIV/0!	#DIV/0!	#DIV/0!	#DIV/0!	#DIV/0!	#DIV/0!	3.64804	0.695878
	ratio over IgG	23.5517	61.5944	70.5402	49.0982	36.7666	#DIV/0!	#DIV/0!	#DIV/0!	#DIV/0!	#DIV/0!	#DIV/0!	#DIV/0!	#DIV/0!	#DIV/0!	#DIV/0!	1.3776	#DIV/0!	#DIV/0!	#DIV/0!	#DIV/0!	#DIV/0!	#DIV/0!	#DIV/0!	2.6891	#DIV/0!
	ratio over IgG	34.4817	64.2101	58.0963	49.0982	44.9523	#DIV/0!	#DIV/0!	#DIV/0!	#DIV/0!	#DIV/0!	#DIV/0!	#DIV/0!	#DIV/0!	#DIV/0!	#DIV/0!	1.09593	#DIV/0!	#DIV/0!	#DIV/0!	#DIV/0!	#DIV/0!	#DIV/0!	#DIV/0!	2.50902
	average 1	29.4001	38.0163	60.082	48.4793	34.906	#DIV/0!	#DIV/0!	#DIV/0!	#DIV/0!	#DIV/0!	#DIV/0!	#DIV/0!	#DIV/0!	#DIV/0!	#DIV/0!	1.01555	#DIV/0!	#DIV/0!	#DIV/0!	#DIV/0!	#DIV/0!	#DIV/0!	#DIV/0!	4.60795	0.00280975
	average 2	29.0167	62.9023	64.3182	49.0982	40.8594	#DIV/0!	#DIV/0!	#DIV/0!	#DIV/0!	#DIV/0!	#DIV/0!	#DIV/0!	#DIV/0!	#DIV/0!	#DIV/0!	1.23676	#DIV/0!	#DIV/0!	#DIV/0!	#DIV/0!	#DIV/0!	#DIV/0!	#DIV/0!	2.59906	0.434515
	average	Bmp5 -8450	Bmp5-5992	Bmp5 +11859	Bmp5+11268	Bmp5+24561	Nkx3.1+984	Ccnd1prom	Tmprss2 igg	Muc1	Cdh1	Foxc1	Lim-2 igg	Lim-3	Lim-4	Ret-1-up	Cyp19a1	Hprt	Nkx3.1-121	Pou3f3	NpntL	Ret3	Bmp5-5992	Bmp5 +11854	cdh1	cdkn2c
	ratio	29.2084	50.4593	62.2001	48.7887	37.8827	#DIV/0!	#DIV/0!	#DIV/0!	#DIV/0!	#DIV/0!	#DIV/0!	#DIV/0!	#DIV/0!	#DIV/0!	#DIV/0!	1.12616	#DIV/0!	#DIV/0!	#DIV/0!	#DIV/0!	#DIV/0!	#DIV/0!	#DIV/0!	3.6035	#DIV/0!
	stdev	0.271145	17.597	2.99546	0.437657	4.20975	#DIV/0!	#DIV/0!	#DIV/0!	#DIV/0!	#DIV/0!	#DIV/0!	#DIV/0!	#DIV/0!	#DIV/0!	#DIV/0!	0.156421	#DIV/0!	#DIV/0!	#DIV/0!	#DIV/0!	#DIV/0!	#DIV/0!	#DIV/0!	1.4205	#DIV/0!
	pvalue
	compared to Cdh1	0.0001	0.0008	0.0006	0.0001	0.0001											0.0182								na
	compared to Cyp19a1	0.0001	0.0006	0.0005	0.0001	0.0001											na								0.0182
