# Supplementary material for: Regulation of stem/progenitor cell maintenance by BMP5 in prostate homeostasis and cancer initiation
Source: eLife. 2020 Sep 7;9:e54542. doi: 10.7554/eLife.54542 (PMC7525654; doi:10.7554/eLife.54542)
Supplement: Figure 2—source data 1. [file elife-54542-fig2-data1.xlsx]

## Sheet: Fig2C
P3-P4 and P2-P3-P4	P3-P4 and P2-P3-P4 and P0-P2	P2-P3-P4 only	P3-P4 only
Actg2	Gm6311	5730507C01Rik	1700024P16Rik
Angpt1	Rps3a2	A630095E13Rik	2700081O15Rik
Apobec3	Rps3a3	Ankrd35	9930111J21Rik2
Bhlhe22	mt-Nd3	Ano1	AI464131
Bmp5	Rps2-ps6	Bmp2	Abcg2
Casp14	Hmga1-rs1	Caprin1	Actr3
Cd34	Gm7336	Cep85	Adamtsl4
Clec2f	Gm12191	Col2a1	Aebp1
Cnbd2	Gm12671	Col8a1	Agmo
Col5a1	Gm13394	Coro2a	Aif1l
Col5a2	Gm10359	Cyp2f2	Aig1
Edn1		Def8	Aldh1l1
Exph5		Esyt3	Amot
F2r		Fam195b	Ank
Fam213a		Gm15920	Apcdd1
Fignl2		Gm20796	Arsj
Fkbp5		Gm2539	Atn1
Flot1		Gm5921	Bmp7
Ggct		Gm6472	Capn5
Gimap8		Grasp	Car9
Gja1		H2-T10	Cd55
Glipr1		Il15ra	Cd55
Glo1		Kif1a	Celf4
Gm11249		Kitl	Cep97
Gm12663		Matn2	Chst11
Gm13408		Matn2	Chst2
Gm13443		Meis2	Ckap4
Gm14292		Nox4	Clca3a2
Gm15264		Osmr	Col11a1
Gm15487		Pex2	Col11a1
Gm28438		Piezo2	Col3a1
Gm6969		Plekho1	Cp
Gm7293		Ppap2b	Crocc
Gm8276		Ppp2r2c	Crocc
Gm8822		Prnd	Cspg4
Gm9825		Prss12	Ctnnbl1
Gpa33		Pxdc1	Ctse
H60b		Rnaset2a	Cxcl15
Hcfc1r1		Rnls	Cyp7b1
Hrsp12		Rps7	Dram1
Ifi27		Sema4f	Dusp1
Ivl		Sema7a	Dusp1
Kcnf1		Senp6	E130012A19Rik
Kcnj15		Shisa4	Fads1
Kctd11		Slc16a1	Fam20a
Kif5c		Slpi	Fn1
Larp4		Sprr1b	Fst
Lbp		Tenm2	Galnt14
Lgr4		Tlr2	Gjb2
Ly6a		Tmprss11e	Gm9747
Ly6c1		Wfdc18	Gpx3
Lypd6b		Zfp182	Gsdmc2
Mcam			H2-T22
Mnd1			Hebp1
Msx2			Hnrnph2
NA			Hs3st1
Nptxr			Ifitm2
Nyap1			Ifitm3
Oxr1			Kcne4
Pcdh7			Lgals3bp
Plec			Lgals9
Plscr4			Lifr
Ppp1r9a			Llgl2
Prkar2b			Lox
Pros1			Lurap1l
Rbm46			Mal
Rnf125			Mgat5
Rnps1			Mlph
Rpl3-ps1			Mmp2
Rpl30-ps10			Mrgprb2
Rps2-ps10			Mtmr7
Sgk1			Ncoa7
Sgms1			Ncor2
Snx18			Nhsl1
Stat3			Nme3
Tagap			Oas1a
Tgfbr3			Olfm2
Timp3			P2rx2
Tll1			Padi2
Tmem176a			Padi4
Tmem176b			Papln
Unc5a			Pcsk9
			Pls1
			Prrg3
			Psmd1
			Ptpn14
			Ramp1
			Rbp1
			Rnd3
			Rnf180
			Ror1
			Skint7
			Slc15a2
			Slc29a1
			Slc29a1
			Slc5a5
			Snx24
			Sptbn2
			Sptlc3
			Stmn1
			Stom
			Syvn1
			Tagap1
			Tap2
			Tcp11l1
			Tgfb3
			Tmem8b
			Tnpo1
			Trim7
			Tuba8
			Unc13d
			Zfp422
