# Supplementary material for: Regulation of stem/progenitor cell maintenance by BMP5 in prostate homeostasis and cancer initiation
Source: eLife. 2020 Sep 7;9:e54542. doi: 10.7554/eLife.54542 (PMC7525654; doi:10.7554/eLife.54542)
Supplement: Figure 2—source data 2. [file elife-54542-fig2-data2.xlsx]

## Sheet: Fig2D
gene_symbol	Wild type_Passage0	Wild type_Passage2	Wild type_Passage3	Wild type_Passage4	PbCreGata3f/f_Passage0	PbCreGata3f/f_Passage2	PbCreGata3f/f_Passage3	PbCreGata3f/f_Passage4
ACTG2	0	0	0	0	2	55.78	70.42	215.1
KIF5C	1	1.31	1.41	1.16	2.4	2.92	3.44	5.68
ND3	1	0.87	0.73	0.92	4.97	5.05	6.56	10.51
BMP5	1	0.26	0.01	0.01	1.34	1.43	2.63	5.22
LGR4	1	1.52818	0.0127251	7.36328	92.8635	611.52	830.836	2411.56
COL5A1	1	0.3	0.27	0.15	3.51	3.43	3.63	3.8
MEIS2	1	390.582	271.71	219.938	27.6187	0.348557	2.81027	0.0259379
CEP97	1	1.39	1.54	1.86	1.23	1.08	0.53	0.49
PROS1	1	0.98	1.18	1.7	1.08	0.66	0.56	0.53
ABCG2	1	1.54	2.13	3.51	0.98	1	0.61	0.34
SNX18	1	1.76	2.46	3.18	1.08	1.17	1.18	0.99
TRIM7	1	0.98	1.66	3.03	1.25	1.19	0.9	0.7
UNC13D	1	15.3	66.15	95.78	74.08	21.24	1	1
Zfp422	1	0.84	1.29	2.28	2.46	1.36	0.03	0.03
TNPO1	1	0.0127048	524.467	737.381	769.523	3.67193e-06	0.000502757	0.00111086
