# Supplementary material for: Regulation of stem/progenitor cell maintenance by BMP5 in prostate homeostasis and cancer initiation
Source: eLife. 2020 Sep 7;9:e54542. doi: 10.7554/eLife.54542 (PMC7525654; doi:10.7554/eLife.54542)
Supplement: Figure 3—source data 2. [file elife-54542-fig3-data2.xlsx]

## Sheet: Fig3E
Analysis Name: UGSM wt
Proportion: 0.0001269 Frequency: 1 in 7,878
Proportion - 1 S.E.: 0.0000957 Frequency - 1 S.E.: 1 in 10,454
Proportion + 1 S.E.: 0.0001684 Frequency + 1 S.E.: 1 in 5,937
Dose	Responses	Tested
25000	5	5
20000	2	2
10000	2	3
5000	2	7
2000	2	11
1000	3	14
Analysis Name: UGSM+BMP5
Proportion: 0.0004856 Frequency: 1 in 2,059
Proportion - 1 S.E.: 0.0002749 Frequency - 1 S.E.: 1 in 3,638
Proportion + 1 S.E.: 0.0008578 Frequency + 1 S.E.: 1 in 1,166
Dose	Responses	Tested
10000	4	4
5000	4	4
2000	4	4						Basal cells	UGSM	Log Prop.	S.E. of Log Prop.	Difference in Log Prop.'s	Ratio of Prop.'s	95% C.I. for Ratio of Prop.'s	Ratio of Prop.'s=1
1000	0	4						wt	UGSM+BMP5	-7.63021	0.5691
500	0	4						wt	UGSM wt	-9.02924	0.241	1.39903	4.05127	1.20647 to 13.60395	0.0118
Analysis Name: UGSM Bmp5SE/SE
Proportion: 0.0001403 Frequency: 1 in 7,127
Proportion - 1 S.E.: 0.0001004 Frequency - 1 S.E.: 1 in 9,961
Proportion + 1 S.E.: 0.0001961 Frequency + 1 S.E.: 1 in 5,099
Dose	Responses	Tested
20000	1	2
10000	3	3
5000	5	8						Basal cells	UGSM	Log Prop.	S.E. of Log Prop.	Difference in Log Prop.'s	Ratio of Prop.'s	95% C.I. for Ratio of Prop.'s	Ratio of Prop.'s=1
2000	2	6						wt	UGSM Bmp5SE/SE	-8.87168	0.3348
1000	0	5						wt	UGSM wt	-8.97188	0.2829	0.1002	1.10539	0.46818 to 2.60988	0.4096
Analysis Name: bmp5SE/SE
Proportion: 0.0000496 Frequency: 1 in 20,175
Proportion - 1 S.E.: 0.0000350 Frequency - 1 S.E.: 1 in 28,532
Proportion + 1 S.E.: 0.0000701 Frequency + 1 S.E.: 1 in 14,266
Dose	Responses	Tested
75000	1	1
25000	2	3
15000	4	4
10000	1	4
7500	0	4						Basal cells	UGSM	Log Prop.	S.E. of Log Prop.	Difference in Log Prop.'s	Ratio of Prop.'s	95% C.I. for Ratio of Prop.'s	Ratio of Prop.'s=1
5000	1	4						Bmp5SE/SE	wt	-9.91219	0.3466	1.14047	3.12824	1.24639 to 7.85139	0.0076
2500	0	4						Wt	wt	-8.77172	0.3167
