# Supplementary material for: Regulation of stem/progenitor cell maintenance by BMP5 in prostate homeostasis and cancer initiation
Source: eLife. 2020 Sep 7;9:e54542. doi: 10.7554/eLife.54542 (PMC7525654; doi:10.7554/eLife.54542)
Supplement: Figure 4—figure supplement 2—source data 1. [file elife-54542-fig4-figsupp2-data1.xlsx]

## Sheet: CaP2
Elapsed	0	2	4	6	8	10	12	14	16	18	20	22	24
CaP2 (1) 35K / well (A5)	17.9592	27.8597	34.5697	37.175	39.4727	42.6694	45.0324	45.6589	47.1443	51.0183	57.3287	64.5323	69.1119
CaP2 (1) 35K / well (A6)	19.3109	30.3606	36.6589	39.9441	42.3811	45.0551	47.002	48.0553	49.3168	53.4939	60.3083	67.4709	72.2195
k02288 10uM CaP2 (1) 35K / well (B5)	14.3225	22.0059	25.4579	27.4724	30.0584	32.5359	35.9497	39.1266	42.1958	44.1088	45.4528	48.3061	51.7308
k02288 10uM CaP2 (1) 35K / well (B6)	14.5426	22.0706	25.5257	27.64	30.0342	32.5116	36.207	39.5037	42.5763	44.4262	46.0471	49.2551	52.1605
k02288 20uM CaP2 (1) 35K / well (C4)	11.6581	15.5564	17.1476	17.9127	17.8122	18.303	18.8031	19.287	19.8194	20.2023	20.6093	21.014	21.6095
k02288 20uM CaP2 (1) 35K / well (C5)	12.6073	17.1272	18.8874	19.2444	19.5836	20.1918	20.8129	21.4164	22.0114	22.5973	22.7202	23.2605	24.3115
k02288 20uM CaP2 (1) 35K / well (C6)	14.1807	19.1207	21.1831	21.626	21.8998	22.3319	22.8489	23.6984	24.2657	24.5424	24.7245	25.3417	26.1639
k02288 50uM CaP2 (1) 35K / well (D4)	11.4752	13.3667	14.3932	14.5587	14.4259	14.1424	13.7858	13.7011	13.7411	13.8633	13.7552	13.8182	13.7989
k02288 50uM CaP2 (1) 35K / well (D5)	12.298	14.5116	15.4796	15.4813	15.1873	14.9117	14.709	14.5392	14.5664	14.7282	14.7267	14.7194	14.7965
k02288 50uM CaP2 (1) 35K / well (D6)	12.1561	15.1154	16.3117	16.3766	16.2152	15.7895	15.4597	15.4706	15.2729	15.3386	15.3937	15.3908	15.2715
	0	2	4	6	8	10	12	14	16	18	20	22	24
caP2 control	18.6351	29.1101	35.6143	38.5595	40.9269	43.8622	45.0324	46.8571	49.3168	53.4939	60.3083	66.0016	70.6657
10uM K02288	14.4325	22.0383	25.4918	27.5562	30.0463	32.5237	36.0784	39.3151	42.3861	44.2675	45.7499	48.7806	51.9457
20uM K02288	12.8154	17.2681	19.0727	19.5944	19.7652	20.2756	20.8216	21.4672	22.0321	22.4474	22.6847	23.2054	24.0283
50uM K02288	11.9764	14.3312	15.3949	15.4722	15.2761	14.9479	14.6515	14.5703	14.5268	14.6434	14.6252	14.6428	14.6223
caP2	0	2	4	6	8	10	12	14	16	18	20	22	24
Control	10	20.4751	26.9792	29.9245	32.2919	35.2272	36.3974	38.2221	40.6818	44.8589	51.6733	57.3665	62.0307
10uM K02288	10	17.6057	21.0593	23.1237	25.6138	28.0912	31.6458	34.8826	37.9535	39.835	41.3174	44.348	47.5131
20uM K02288	10	14.4527	16.2573	16.779	16.9498	17.4602	18.0063	18.6519	19.2168	19.632	19.8693	20.39	21.2129
50uM K02288	10	12.3548	13.4184	13.4958	13.2997	12.9715	12.6751	12.5939	12.5504	12.667	12.6488	12.6664	12.6459
Table Analyzed	caP2
Kruskal-Wallis test
P value	< 0.0001
Exact or approximate P value?	Approximate
P value summary	****
Do the medians vary signif. (P < 0.05)	Yes
Number of groups	4
Kruskal-Wallis statistic	30.44
Data summary
Number of treatments (columns)	4
Number of values (total)	52
Number of families	1
Number of comparisons per family	6
Alpha	0.05
Dunn's multiple comparisons test	Mean rank diff.	Significant?	Summary
Control vs. 10uM K02288	3.923	No	ns
Control vs. 20uM K02288	17.54	Yes	*
Control vs. 50uM K02288	29.31	Yes	****
10uM K02288 vs. 20uM K02288	13.62	No	ns
10uM K02288 vs. 50uM K02288	25.38	Yes	***
20uM K02288 vs. 50uM K02288	11.77	No	ns
Test details	Mean rank 1	Mean rank 2	Mean rank diff.	n1	n2
Control vs. 10uM K02288	39.19	35.27	3.923	13	13
Control vs. 20uM K02288	39.19	21.65	17.54	13	13
Control vs. 50uM K02288	39.19	9.885	29.31	13	13
10uM K02288 vs. 20uM K02288	35.27	21.65	13.62	13	13
10uM K02288 vs. 50uM K02288	35.27	9.885	25.38	13	13
20uM K02288 vs. 50uM K02288	21.65	9.885	11.77	13	13

## Sheet: caP8
Elapsed	0	2	4	6	8	10	12	14	16	18	20	22	24
k02288 10uM CaP8 (1) 35K / well (B10)	15.0636	22.5898	24.6547	25.7322	27.3779	28.8829	31.7996	34.331	37.2728	39.3111	41.7271	44.2241	47.2301
k02288 10uM CaP8 (1) 35K / well (B11)	13.8967	19.8094	22.2384	23.0552	23.7267	25.347	28.0082	30.6566	32.9313	35.0966	36.6393	39.0754	42.0245
k02288 10uM CaP8 (1) 35K / well (B12)	13.5411	19.4466	22.2219	22.5553	23.928	26.1322	27.8841	29.9251	32.6601	34.7706	36.0566	38.8506	41.6562
CaP8 (1) 35K / well (A11)	13.9291	21.0618	25.2268	28.0309	31.0814	33.2306	34.4564	36.0977	37.58	40.6879	46.1287	53.3388	59.1257
CaP8 (1) 35K / well (A12)	16.0363	23.9124	28.5372	30.7384	34.5551	35.9355	37.4286	38.7204	40.5071	44.7982	50.0883	57.5772	63.179
k02288 20uM CaP8 (1) 35K / well (C10)	11.4423	14.5131	15.5781	15.6364	15.7893	15.3964	15.4017	15.2015	15.1102	15.2652	15.232	15.3377	15.2531
k02288 20uM CaP8 (1) 35K / well (C11)	14.624	18.1716	19.5071	19.4881	19.124	18.6204	18.387	18.153	18.2596	18.3416	18.0175	18.2805	18.2499
k02288 20uM CaP8 (1) 35K / well (C12)	15.0524	18.4338	20.0462	20.0995	19.7113	19.1346	18.9147	18.7432	18.697	18.7121	18.6018	18.6777	18.5421
k02288 50uM CaP8 (1) 35K / well (D10)	11.9575	13.8593	14.5698	15.0194	14.3305	13.804	13.4153	13.2199	13.0164	12.8682	12.8822	12.9929	12.9095
k02288 50uM CaP8 (1) 35K / well (D11)	12.4243	14.4053	15.3067	15.4475	14.8491	14.0735	13.665	13.2352	13.3588	13.3257	13.2223	13.36	13.2393
k02288 50uM CaP8 (1) 35K / well (D12)	10.6276	11.9353	12.6019	12.6607	12.2041	11.8042	11.4822	11.2779	11.1293	11.1577	11.2431	11.2102	11.0848
	0	2	4	6	8	10	12	14	16	18	20	22	24
caP8 control	14.9827	22.4871	26.882	29.3847	32.8183	34.5831	35.9425	37.409	39.0436	42.743	48.1085	55.458	61.1523
10uM K02288	14.1672	20.6152	23.0383	23.7809	25.0109	26.7874	29.2306	31.6375	34.2881	36.3928	38.141	40.7167	43.637
20uM K02288	13.7062	17.0395	18.3771	18.408	18.2082	17.7172	17.5678	17.3659	17.3556	17.4396	17.2838	17.432	17.3484
50uM K02288	11.6698	13.4	14.1595	14.3759	13.7946	13.2272	12.8542	12.5777	12.5015	12.4505	12.4492	12.521	12.4112
caP8	0	2	4	6	8	10	12	14	16	18	20	22	24
Control	10	17.5044	21.8993	24.402	27.8356	29.6004	30.9599	32.4264	34.0609	37.7604	43.1259	50.4753	56.1697
10uM K02288	10	16.4481	18.8712	19.6137	20.8437	22.6202	25.0635	27.4704	30.1209	32.2256	33.9738	36.5495	39.4698
20uM K02288	10	13.3333	14.6709	14.7018	14.502	14.0109	13.8616	13.6597	13.6494	13.7334	13.5775	13.7257	13.6422
50uM K02288	10	11.7301	12.4896	12.706	12.1247	11.5574	11.1843	10.9079	10.8317	10.7807	10.7794	10.8512	10.7414
Table Analyzed	caP8
Kruskal-Wallis test
P value	< 0.0001
Exact or approximate P value?	Approximate
P value summary	****
Do the medians vary signif. (P < 0.05)	Yes
Number of groups	4
Kruskal-Wallis statistic	31.72
Data summary
Number of treatments (columns)	4
Number of values (total)	52
Number of families	1
Number of comparisons per family	6
Alpha	0.05
Dunn's multiple comparisons test	Mean rank diff.	Significant?	Summary
Control vs. 10uM K02288	4	No	ns
Control vs. 20uM K02288	18.62	Yes	*
Control vs. 50uM K02288	29.69	Yes	****
10uM K02288 vs. 20uM K02288	14.62	No	ns
10uM K02288 vs. 50uM K02288	25.69	Yes	****
20uM K02288 vs. 50uM K02288	11.08	No	ns
Test details	Mean rank 1	Mean rank 2	Mean rank diff.	n1	n2
Control vs. 10uM K02288	39.58	35.58	4	13	13
Control vs. 20uM K02288	39.58	20.96	18.62	13	13
Control vs. 50uM K02288	39.58	9.885	29.69	13	13
10uM K02288 vs. 20uM K02288	35.58	20.96	14.62	13	13
10uM K02288 vs. 50uM K02288	35.58	9.885	25.69	13	13
20uM K02288 vs. 50uM K02288	20.96	9.885	11.08	13	13
